# Supplementary material for: Palladium-catalyzed Ugi-type reaction of 2-iodoanilines with isocyanides and carboxylic acids affording N-acyl anthranilamides
Source: Royal Society of Chemistry journal article supplement (doi:10.1039/d1cc01226f), 2021-01-01
Supplement: d1cc01226f1.pdf [file d1cc01226f1.pdf]

## Supporting Information

**Palladium-catalyzed Ugi-type reaction of 2-iodoanilines with isocyanides and carboxylic acids affording *N*-acyl anthranilamides**

## Content

|                                                                            |     |
|----------------------------------------------------------------------------|-----|
| 1. General .....                                                           | 3   |
| 2. General Procedure for Synthesis of <i>N</i> -acyl Anthranilamides ..... | 4   |
| 3. Gram Scale Preparation of <b>4aaa</b> .....                             | 22  |
| 4. References .....                                                        | 23  |
| 5. <sup>1</sup> H, <sup>13</sup> C and <sup>19</sup> F NMR Spectra.....    | 24  |
| 6. X-ray of <b>4aaa</b> .....                                              | 158 |

## 1. General

All reagents and all solvents were used directly as obtained commercially unless otherwise noted. The products were purified by column chromatography with silica gel (pore size 60Å, 200-300 Mesh). <sup>1</sup>H NMR and <sup>13</sup>C NMR spectra were recorded from solution in CDCl<sub>3</sub> or DMSO on 400 MHz spectrometers using the solvent residual proton signal. The infrared (IR) spectra were acquired as thin films using a universal ATR sampling accessory on a Bruker Vertex 80 FT-IR spectrometer and the absorption frequencies are reported in cm<sup>-1</sup> using KBr plates. High-resolution mass analysis was performed using a Thermo Scientific™ Q Exactive™ Hybrid Quadrupole-Orbitrap Mass Spectrometer. 2-Isocyano-1,3-dimethyl benzene (**1a**)<sup>1</sup>, isocyanobenzene (**1b**)<sup>2</sup>, 1-isocyano-2-methylbenzene (**1c**)<sup>3</sup>, 1-(*tert*-butyl)-2-isocyanobenzene (**1d**)<sup>4</sup>, 1-chloro-2-isocyanobenzene (**1e**)<sup>5</sup>, 1-isocyano-2-(trifluoromethyl)benzene (**1f**)<sup>6</sup>, ethyl (*E*)-3-(2-isocyanophenyl)acrylate (**1g**)<sup>7</sup>, 1-bromo-3-isocyanobenzene (**1h**)<sup>6</sup>, 1-isocyano-4-methylbenzene (**1i**)<sup>5</sup>, 1-isocyano-3,5-dimethoxybenzene (**1j**)<sup>8</sup>, 2-isocyano-1-methoxy-4-methylbenzene (**1k**)<sup>9</sup>, 1-chloro-2-isocyano-3-methylbenzene (**1l**)<sup>1</sup>, 1-chloro-3-isocyano-2,4-dimethylbenzene (**1m**)<sup>9</sup>, 1-isocyano-naphthalene (**1n**)<sup>5</sup> were prepared according to literature procedure.

## 2. General Procedure for Synthesis of *N*-acyl Anthranilamides

Carboxylic acid **3** (0.3 mmol, 1.5 equiv.) and Cs<sub>2</sub>CO<sub>3</sub> (0.15 mmol, 0.75 equiv.) were added to a solution of TBAC (0.2 mmol, 1.0 equiv.) in water (0.4 mL). The resulting mixture was stirred at 80 °C for 0.5 h, then cooled down to room temperature (solution A).

Under Ar atmosphere, Pd(dba)<sub>2</sub> (0.02 mmol, 10 mol %) and BINAP (0.04 mmol, 20 mol %) were added to toluene (1.0 mL). After stirring for 15 min at RT, aniline **2** (0.3 mmol, 1.5 equiv.) was added followed by solution A. The resulting mixture was heated at 100 °C with stirring for 0.5 h by using a heating block before a solution of isocyanide **1** (0.2 mmol, 1.0 equiv.) in toluene (2.0 mL) was added over 2 hours by using a syringe pump. The reaction was further stirred for 0.5 h at 100 °C. The completed reaction was cooled down to RT, quenched with brine (20.0 mL) and extracted with DCM (3 × 20 mL). The combined organic layers were dried (anhydrous MgSO<sub>4</sub>), filtered, and concentrated under reduced pressure. The residue was purified by column chromatography (silica gel, petroleum ether/EtOAc).

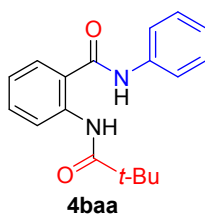

### *N*-Phenyl-2-pivalamidobenzamide (**4baa**)

Compound **4baa** was prepared following the general procedure using isocyanide **1b** (0.2 mmol, 20.6 mg), aniline **2a** (0.3 mmol, 65.7 mg) and carboxylic acid **3a** (0.3 mmol, 30.6 mg). Purification by flash column chromatography (silica gel, PE/EA = 5:1) afforded **4baa** as a yellow solid (44.5 mg, 75%): m.p.: 226-227 °C; <sup>1</sup>H NMR (400 MHz, CDCl<sub>3</sub>) δ 10.84 (s, 1H), 8.62 (s, 1H), 8.35 (d, *J* = 8.4 Hz, 1H), 7.70 (d, *J* = 8.3 Hz, 2H), 7.48 (d, *J* = 7.8 Hz, 1H), 7.40 (t, *J* = 7.8 Hz, 2H), 7.30 (t, *J* = 7.9 Hz, 1H), 7.18 (t, *J* = 7.4 Hz, 1H), 6.99 (t, *J* = 7.6 Hz, 1H), 1.31 (s, 9H); <sup>13</sup>C NMR (101 MHz, CDCl<sub>3</sub>) δ 178.2, 167.4, 139.4, 138.0, 132.3, 129.3, 127.2, 125.0, 123.0, 122.3, 122.2, 120.7, 40.2, 27.8; IR (neat) 3289, 2961, 1652, 1521, 1438, 755 cm<sup>-1</sup>; HRMS(ESI) *m/z*: Calcd for C<sub>18</sub>H<sub>20</sub>N<sub>2</sub>NaO<sub>2</sub> [M+Na]<sup>+</sup>: 319.1417; Found 319.1416.

The spectral data match those previously reported<sup>[10]</sup>.

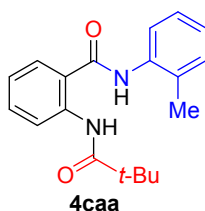

### 2-Pivalamido-*N*-(*o*-tolyl)benzamide (**4caa**)

Compound **4caa** was prepared following the general procedure using isocyanide **1c** (0.2 mmol, 23.4 mg), aniline **2a** (0.3 mmol, 65.7 mg) and carboxylic acid **3a** (0.3 mmol, 30.6 mg). Purification by

flash column chromatography (silica gel, PE/EA = 5:1) afforded **4caa** as a white solid (49.5 mg, 80%): m.p.: 180-181 °C; <sup>1</sup>H NMR (400 MHz, CDCl<sub>3</sub>) δ 11.08 (s, 1H), 8.61 (d, *J* = 8.4 Hz, 1H), 7.87 (s, 1H), 7.71 (d, *J* = 7.9 Hz, 1H), 7.63 (d, *J* = 7.8 Hz, 1H), 7.47 (t, *J* = 7.9 Hz, 1H), 7.29 – 7.23 (m, 2H), 7.19 – 7.13 (m, 1H), 7.09 (t, *J* = 7.6 Hz, 1H), 2.32 (s, 3H), 1.29 (s, 9H); <sup>13</sup>C NMR (101 MHz, CDCl<sub>3</sub>) δ 178.1, 167.7, 140.4, 135.3, 133.0, 131.2, 131.0, 127.1, 126.8, 126.5, 124.4, 122.9, 122.2, 121.3, 40.3, 27.8, 18.1; IR (neat) 2957, 2922, 2856, 1655, 1516, 1439, 754 cm<sup>-1</sup>; HRMS(ESI) *m/z*: Calcd for C<sub>19</sub>H<sub>22</sub>N<sub>2</sub>NaO<sub>2</sub> [M+Na]<sup>+</sup>: 333.1573 found 333.1570.

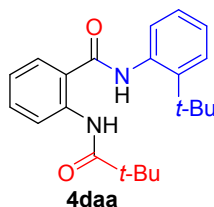

#### ***N*-(2-(*tert*-Butyl)phenyl)-2-pivalamidobenzamide (4daa)**

Compound **4daa** was prepared following the general procedure using isocyanide **1d** (0.2 mmol, 31.9 mg), aniline **2a** (0.3 mmol, 65.7 mg) and carboxylic acid **3a** (0.3 mmol, 30.6 mg). Purification by flash column chromatography (silica gel, PE/EA = 10:1) afforded **4daa** as a white solid (53.5 mg, 76%): m.p.: 188-190 °C; <sup>1</sup>H NMR (400 MHz, CDCl<sub>3</sub>) δ 11.12 (s, 1H), 8.66 (d, *J* = 8.4 Hz, 1H), 7.84 (s, 1H), 7.64 (d, *J* = 7.8 Hz, 1H), 7.51 (t, *J* = 7.9 Hz, 1H), 7.46 (d, *J* = 7.6 Hz, 2H), 7.33 – 7.25 (m, 2H), 7.14 (t, *J* = 7.5 Hz, 1H), 1.41 (s, 9H), 1.27 (s, 9H). <sup>13</sup>C NMR (101 MHz, CDCl<sub>3</sub>) δ 178.1, 168.3, 144.8, 140.3, 134.7, 133.0, 129.5, 127.6, 127.3, 127.2, 126.5, 123.0, 122.1, 121.4, 40.3, 35.0, 30.9, 27.7; IR (neat) 2961, 2923, 1656, 1590, 1511, 1437, 756 cm<sup>-1</sup>; HRMS(ESI) *m/z*: Calcd for C<sub>22</sub>H<sub>28</sub>N<sub>2</sub>NaO<sub>2</sub> [M+Na]<sup>+</sup>: 375.2043; Found 375.2040.

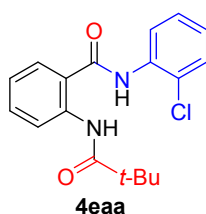

#### ***N*-(2-Chlorophenyl)-2-pivalamidobenzamide (4eaa)**

Compound **4eaa** was prepared following the general procedure using isocyanide **1e** (0.2 mmol, 27.5 mg), aniline **2a** (0.3 mmol, 65.7 mg) and carboxylic acid **3a** (0.3 mmol, 30.6 mg). Purification by flash column chromatography (silica gel, PE/EA = 10:1) afforded **4eaa** as a white solid (54.4 mg, 82%): m.p.: 138-139 °C; <sup>1</sup>H NMR (400 MHz, CDCl<sub>3</sub>) δ 11.10 (s, 1H), 8.69 (d, *J* = 8.5 Hz, 1H), 8.44 – 8.37 (m, 2H), 7.67 (d, *J* = 7.9 Hz, 1H), 7.52 (t, *J* = 7.9 Hz, 1H), 7.41 (d, *J* = 8.0 Hz, 1H), 7.33 (t, *J* = 7.8 Hz, 1H), 7.17 – 7.07 (m, 2H), 1.32 (s, 9H); <sup>13</sup>C NMR (101 MHz, CDCl<sub>3</sub>) δ 178.0, 167.3, 140.7, 134.4, 133.5, 129.4, 128.0, 126.7, 125.6, 124.0, 123.1, 122.2, 122.1, 120.7, 40.4, 27.8; IR (neat) 2957, 2922, 2859, 1662, 1516, 1433, 753 cm<sup>-1</sup>; HRMS(ESI) *m/z*: Calcd for C<sub>18</sub>H<sub>19</sub>ClN<sub>2</sub>NaO<sub>2</sub> [M+Na]<sup>+</sup>: 353.1027; Found 353.1023.

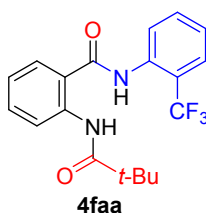

### 2-Pivalamido-N-(2-(trifluoromethyl)phenyl)benzamide (4faa)

Compound **4faa** was prepared following the general procedure using isocyanide **1f** (0.2 mmol, 34.2 mg), aniline **2a** (0.3 mmol, 65.7 mg) and carboxylic acid **3a** (0.3 mmol, 30.6 mg). Purification by flash column chromatography (silica gel, PE/EA = 5:1) afforded **4faa** as a white solid (30.7 mg, 42%): m.p.: 152-153 °C; <sup>1</sup>H NMR (400 MHz, CDCl<sub>3</sub>) δ 11.02 (s, 1H), 8.69 (d, *J* = 8.5 Hz, 1H), 8.22 (d, *J* = 8.2 Hz, 1H), 8.16 (s, 1H), 7.68 (d, *J* = 7.9 Hz, 1H), 7.66 – 7.57 (m, 2H), 7.53 (td, *J* = 7.9, 1.2 Hz, 1H), 7.31 (t, *J* = 7.7 Hz, 1H), 7.14 (td, *J* = 7.6, 1.0 Hz, 1H), 1.32 (s, 9H); <sup>13</sup>C NMR (101 MHz, CDCl<sub>3</sub>) δ 178.01, 167.72, 140.84, 135.03, 133.69, 133.25, 126.6 (q, *J*<sub>C-F</sub> = 5.1 Hz), 126.43, 125.60, 125.4, 124.3 (q, *J*<sub>C-F</sub> = 273.7 Hz), 123.2, 122.25, 121.6 (q, *J*<sub>C-F</sub> = 30.3 Hz), 120.47, 40.46, 27.81; <sup>19</sup>F NMR (376 MHz, CDCl<sub>3</sub>) δ -60.45 (s, 3F); IR (neat) 2958, 2922, 2858, 1661, 1516, 1318, 759 cm<sup>-1</sup>; HRMS(ESI) *m/z*: Calcd for C<sub>19</sub>H<sub>20</sub>F<sub>3</sub>N<sub>2</sub>O<sub>2</sub> [M+H]<sup>+</sup>: 365.1471; Found 365.1472.

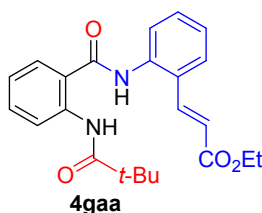

### Ethyl (*E*)-3-(2-(2-pivalamidobenzamido)phenyl)acrylate (4gaa)

Compound **4gaa** was prepared following the general procedure using isocyanide **1g** (0.2 mmol, 40.3 mg), aniline **2a** (0.3 mmol, 65.7 mg) and carboxylic acid **3a** (0.3 mmol, 30.6 mg). Purification by flash column chromatography (silica gel, PE/EA = 10:1) afforded **4gaa** as a white solid (49.1 mg, 62%): m.p.: 190-192 °C; <sup>1</sup>H NMR (400 MHz, CDCl<sub>3</sub>) δ 11.01 (s, 1H), 8.60 (d, *J* = 8.4 Hz, 1H), 8.13 (s, 1H), 7.83 (d, *J* = 15.9 Hz, 1H), 7.67 (t, *J* = 7.1 Hz, 2H), 7.61 (d, *J* = 7.8 Hz, 1H), 7.50 – 7.39 (m, 2H), 7.27 (t, *J* = 7.6 Hz, 1H), 7.09 (t, *J* = 7.5 Hz, 1H), 6.41 (d, *J* = 15.9 Hz, 1H), 4.20 (q, *J* = 7.1 Hz, 2H), 1.30 – 1.24 (m, 3H), 1.27 (s, 9H); <sup>13</sup>C NMR (101 MHz, CDCl<sub>3</sub>) δ 178.1, 168.2, 166.7, 140.6, 139.3, 135.6, 133.3, 131.0, 129.5, 127.7, 127.1, 127.0, 126.2, 123.0, 122.1, 121.4, 120.6, 60.9, 40.4, 27.8, 14.5; IR (neat) 2957, 2925, 2856, 1514, 1440, 1266, 1173, 744 cm<sup>-1</sup>; HRMS(ESI) *m/z*: Calcd for C<sub>23</sub>H<sub>26</sub>N<sub>2</sub>NaO<sub>4</sub> [M+Na]<sup>+</sup>: 417.1785; Found 417.1780.

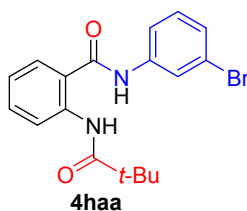

### ***N*-(3-Bromophenyl)-2-pivalamidobenzamide (4haa)**

Compound **4haa** was prepared following the general procedure using isocyanide **1h** (0.2 mmol, 36.4 mg), aniline **2a** (0.3 mmol, 65.7 mg) and carboxylic acid **3a** (0.3 mmol, 30.6 mg). Purification by flash column chromatography (silica gel, PE/EA = 5:1) afforded **4haa** as a white solid (50.5 mg, 67%): m.p.: 193-194 °C; <sup>1</sup>H NMR (400 MHz, CDCl<sub>3</sub>) δ 10.68 (s, 1H), 8.99 – 8.89 (m, 1H), 8.23 – 8.16 (m, 1H), 8.02 (s, 1H), 7.64 (d, *J* = 7.8 Hz, 1H), 7.41 (d, *J* = 7.7 Hz, 1H), 7.33 – 7.20 (m, 3H), 6.96 (t, *J* = 7.5 Hz, 1H), 1.32 (s, 9H). <sup>13</sup>C NMR (101 MHz, CDCl<sub>3</sub>) δ 178.4, 167.4, 139.6, 139.1, 132.3, 130.6, 127.8, 127.4, 123.4, 123.2, 122.9, 122.6, 122.2, 119.0, 40.2, 27.8; IR (neat) 2957, 2922, 2859, 1657, 1588, 1520, 751 cm<sup>-1</sup>; HRMS(ESI) *m/z*: Calcd for C<sub>18</sub>H<sub>20</sub>BrN<sub>2</sub>O<sub>2</sub> [M+H]<sup>+</sup>: 375.0703; Found 375.0702.

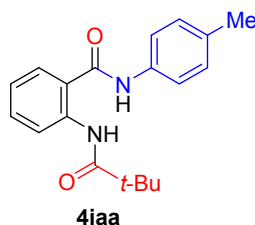

### **2-Pivalamido-*N*-(*p*-tolyl)benzamide (4iaa)**

Compound **4iaa** was prepared following the general procedure using isocyanide **1i** (0.2 mmol, 23.4 mg), aniline **2a** (0.3 mmol, 65.7 mg) and carboxylic acid **3a** (0.3 mmol, 30.6 mg). Purification by flash column chromatography (silica gel, PE/EA = 5:1) afforded **4iaa** as a white solid (43.7 mg, 70%): m.p.: 185-187 °C; <sup>1</sup>H NMR (400 MHz, CDCl<sub>3</sub>) δ 10.86 (s, 1H), 8.62 (s, 1H), 8.33 (d, *J* = 8.3 Hz, 1H), 7.57 (d, *J* = 7.8 Hz, 2H), 7.46 (d, *J* = 7.7 Hz, 1H), 7.28 (t, *J* = 7.8 Hz, 1H), 7.19 (d, *J* = 7.8 Hz, 2H), 6.96 (t, *J* = 7.4 Hz, 1H), 2.35 (s, 3H), 1.30 (s, 9H). <sup>13</sup>C NMR (101 MHz, CDCl<sub>3</sub>) δ 178.2, 167.4, 139.3, 135.4, 134.7, 132.1, 129.8, 127.2, 123.0, 122.3, 122.2, 120.9, 40.2, 27.8, 21.2; IR (neat) 2957, 2922, 2859, 1657, 1515, 1446, 753 cm<sup>-1</sup>; HRMS(ESI) *m/z*: Calcd for C<sub>19</sub>H<sub>22</sub>N<sub>2</sub>NaO<sub>2</sub> [M+Na]<sup>+</sup>: 311.1573; Found 311.1573.

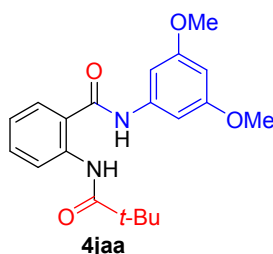

### ***N*-(3,5-Dimethoxyphenyl)-2-pivalamidobenzamide (4jaa)**

Compound **4jaa** was prepared following the general procedure using isocyanide **1j** (0.2 mmol, 32.6 mg), aniline **2a** (0.3 mmol, 65.7 mg) and carboxylic acid **3a** (0.3 mmol, 30.6 mg). Purification by flash column chromatography (silica gel, PE/EA = 5:1) afforded **4jaa** as a white solid (56.9 mg, 80%): m.p.: 214-215 °C; <sup>1</sup>H NMR (400 MHz, CDCl<sub>3</sub>) δ 10.84 (s, 1H), 8.44 (d, *J* = 8.4 Hz, 1H), 8.26 (s, 1H), 7.49 (d, *J* = 7.8 Hz, 1H), 7.36 (t, *J* = 7.8 Hz, 1H), 7.02 (t, *J* = 7.6 Hz, 1H), 6.90 (d, *J* = 1.9 Hz, 2H), 6.30 (s, 1H), 3.81 (s, 6H), 1.31 (s, 9H); <sup>13</sup>C NMR (101 MHz, CDCl<sub>3</sub>) δ 178.2, 167.4, 161.4, 139.7, 139.7, 132.6, 127.0, 123.0, 122.4, 122.1, 99.3, 97.2, 55.7, 40.3, 27.8; IR (neat) 2957, 2922,

2857, 1657, 1453, 1160, 754  $\text{cm}^{-1}$ ; HRMS(ESI)  $m/z$ : Calcd for  $\text{C}_{20}\text{H}_{24}\text{N}_2\text{NaO}_4$   $[\text{M}+\text{Na}]^+$ : 379.1628; Found 379.1622.

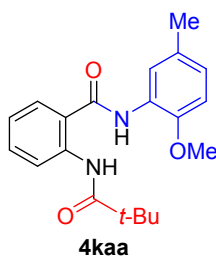

#### ***N*-(2-Methoxy-5-methylphenyl)-2-pivalamidobenzamide (4kaa)**

Compound **4kaa** was prepared following the general procedure using isocyanide **1k** (0.2 mmol, 29.4 mg), aniline **2a** (0.3 mmol, 65.7 mg) and carboxylic acid **3a** (0.3 mmol, 30.6 mg). Purification by flash column chromatography (silica gel, PE/EA = 10:1) afforded **4kaa** as a white solid (64.5 mg, 95%): m.p.: 109-111  $^{\circ}\text{C}$ ;  $^1\text{H}$  NMR (400 MHz,  $\text{CDCl}_3$ )  $\delta$  11.17 (s, 1H), 8.68 (d,  $J = 8.4$  Hz, 1H), 8.47 (s, 1H), 8.23 (s, 1H), 7.61 (d,  $J = 7.8$  Hz, 1H), 7.49 (t,  $J = 7.9$  Hz, 1H), 7.11 (t,  $J = 7.6$  Hz, 1H), 6.90 (d,  $J = 8.3$  Hz, 1H), 6.80 (d,  $J = 8.3$  Hz, 1H), 3.87 (s, 3H), 2.35 (s, 3H), 1.33 (s, 9H);  $^{13}\text{C}$  NMR (101 MHz,  $\text{CDCl}_3$ )  $\delta$  177.8, 166.9, 146.4, 140.3, 132.7, 130.6, 127.0, 126.6, 124.7, 122.7, 121.7, 121.5, 120.8, 110.0, 56.0, 40.2, 27.6, 21.0; IR (neat) 2960, 2924, 2865, 1683, 1530, 1413, 755  $\text{cm}^{-1}$ ; HRMS(ESI)  $m/z$ : Calcd for  $\text{C}_{20}\text{H}_{25}\text{N}_2\text{O}_3$   $[\text{M}+\text{H}]^+$ : 341.1860; Found 341.1859.

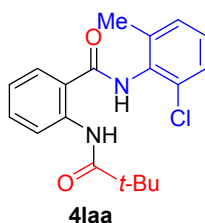

#### ***N*-(2-Chloro-6-methylphenyl)-2-pivalamidobenzamide (4laa)**

Compound **4laa** was prepared following the general procedure using isocyanide **1l** (0.2 mmol, 30.3 mg), aniline **2a** (0.3 mmol, 65.7 mg) and carboxylic acid **3a** (0.3 mmol, 30.6 mg). Purification by flash column chromatography (silica gel, PE/EA = 5:1) afforded **4laa** as a white solid (45.7 mg, 66%): m.p.: 196-197  $^{\circ}\text{C}$ ;  $^1\text{H}$  NMR (400 MHz,  $\text{CDCl}_3$ )  $\delta$  10.99 (s, 1H), 8.62 (t,  $J = 6.7$  Hz, 1H), 7.77 (d,  $J = 7.7$  Hz, 1H), 7.69 (s, 1H), 7.54 – 7.45 (m, 1H), 7.32 (d,  $J = 5.9$  Hz, 1H), 7.22 – 7.17 (m, 2H), 7.15 – 7.08 (m, 1H), 2.32 (s, 3H), 1.26 (s, 9H);  $^{13}\text{C}$  NMR (101 MHz,  $\text{CDCl}_3$ )  $\delta$  178.1, 167.9, 140.39, 140.37, 138.5, 133.34, 133.32, 132.3, 132.2, 132.12, 132.08, 129.6, 128.7, 127.5, 127.20, 127.16, 123.0, 122.01, 121.98, 120.6, 40.3, 27.8, 19.1; IR (neat) 2957, 2922, 2856, 1657, 1590, 1511, 1441, 760  $\text{cm}^{-1}$ ; HRMS(ESI)  $m/z$ : Calcd for  $\text{C}_{19}\text{H}_{21}\text{ClN}_2\text{NaO}_2$   $[\text{M}+\text{Na}]^+$ : 367.1184; Found 367.1175.



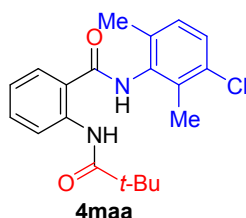

### *N*-(3-Chloro-2,6-dimethylphenyl)-2-pivalamidobenzamide (**4maa**)

Compound **4maa** was prepared following the general procedure using isocyanide **1m** (0.2 mmol, 33.1 mg), aniline **2a** (0.3 mmol, 65.7 mg) and carboxylic acid **3a** (0.3 mmol, 30.6 mg). Purification by flash column chromatography (silica gel, PE/EA = 5:1) afforded **4maa** as a white solid (59.1 mg, 82%): m.p.: 196-197 °C; <sup>1</sup>H NMR (400 MHz, CDCl<sub>3</sub>) δ 11.06 (s, 1H), 8.57 (d, *J* = 8.3 Hz, 1H), 7.82 – 7.70 (m, 2H), 7.46 (t, *J* = 7.8 Hz, 1H), 7.26 (d, *J* = 8.2 Hz, 1H), 7.14 – 7.03 (m, 2H), 2.29 (s, 3H), 2.24 (s, 3H), 1.23 (s, 9H); <sup>13</sup>C NMR (101 MHz, CDCl<sub>3</sub>) δ 178.2, 168.1, 140.4, 134.7, 134.6, 134.4, 133.3, 132.8, 128.9, 128.8, 127.0, 123.0, 122.1, 120.5, 40.3, 27.7, 18.6, 15.9; IR (neat) 2958, 2923, 2859, 1657, 1510, 1439, 756 cm<sup>-1</sup>; HRMS(ESI) *m/z*: Calcd for C<sub>20</sub>H<sub>23</sub>ClN<sub>2</sub>NaO<sub>2</sub> [M+Na]<sup>+</sup>: 381.1340; Found 381.1337.

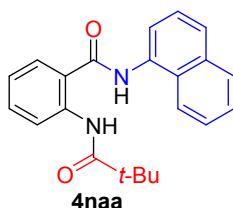

### *N*-(Naphthalen-1-yl)-2-pivalamidobenzamide (**4naa**)

Compound **4naa** was prepared following the general procedure using isocyanide **1n** (0.2 mmol, 26.2 mg), aniline **2a** (0.3 mmol, 65.7 mg) and carboxylic acid **3a** (0.3 mmol, 30.6 mg). Purification by flash column chromatography (silica gel, PE/EA = 5:1) afforded **4naa** as a white solid (59.9 mg, 86%): m.p.: 206-207 °C; <sup>1</sup>H NMR (400 MHz, CDCl<sub>3</sub>) δ 11.06 (s, 1H), 8.65 (d, *J* = 8.3 Hz, 1H), 8.26 (s, 1H), 7.93 – 7.81 (m, 3H), 7.78 (d, *J* = 8.1 Hz, 2H), 7.55 – 7.48 (m, 4H), 7.15 (t, *J* = 7.5 Hz, 1H), 1.27 (s, 9H). <sup>13</sup>C NMR (101 MHz, CDCl<sub>3</sub>) δ 178.1, 168.4, 140.3, 134.4, 133.1, 132.1, 129.0, 128.3, 127.2, 127.0, 126.8, 126.5, 125.8, 123.0, 122.5, 122.2, 121.5, 121.3, 40.3, 27.7. IR (neat) 2956, 2922, 2857, 1511, 1440, 761 cm<sup>-1</sup>; HRMS(ESI) *m/z*: Calcd for C<sub>22</sub>H<sub>22</sub>N<sub>2</sub>NaO<sub>2</sub> [M+Na]<sup>+</sup>: 369.1573; Found 369.1570.

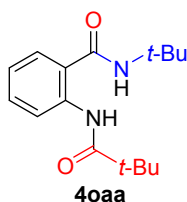

### *N*-(*tert*-Butyl)-2-pivalamidobenzamide (**4oaa**)

Compound **4oaa** was prepared following the general procedure using isocyanide **1o** (0.2 mmol, 16.6 mg), aniline **2a** (0.3 mmol, 65.7 mg) and carboxylic acid **3a** (0.3 mmol, 30.6 mg). Purification by

flash column chromatography (silica gel, PE/EA = 10:1) afforded **4oaa** as a white solid (29.7 mg, 54%): m.p. 180-181 °C; <sup>1</sup>H NMR (400 MHz, CDCl<sub>3</sub>) δ 10.93 (s, 1H), 8.48 (d, *J* = 8.3 Hz, 1H), 7.37 (dd, *J* = 19.7, 7.8 Hz, 2H), 6.99 (t, *J* = 7.5 Hz, 1H), 5.99 (s, 1H), 1.44 (s, 9H), 1.28 (s, 9H). <sup>13</sup>C NMR (101 MHz, CDCl<sub>3</sub>) δ 177.8, 169.2, 139.3, 132.0, 126.4, 123.2, 122.7, 121.9, 52.3, 40.2, 28.9, 27.8; IR (neat) 2958, 2922, 2858, 1651, 1518, 1444, 755 cm<sup>-1</sup>; HRMS(ESI) *m/z*: Calcd for C<sub>16</sub>H<sub>24</sub>N<sub>2</sub>NaO<sub>2</sub> [M+Na]<sup>+</sup>: 299.1730; Found 299.1729.

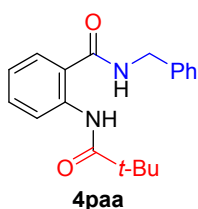

#### ***N*-Benzyl-2-pivalamidobenzamide (4paa)**

Compound **4paa** was prepared following the general procedure using isocyanide **1p** (0.2 mmol, 23.4 mg), aniline **2a** (0.3 mmol, 65.7 mg) and carboxylic acid **3a** (0.3 mmol, 30.6 mg). Purification by flash column chromatography (silica gel, PE/EA = 10:1) afforded **4paa** as a white solid (37.1 mg, 60%): m.p.: 130-131 °C; <sup>1</sup>H NMR (400 MHz, CDCl<sub>3</sub>) δ 11.24 (s, 1H), 8.63 (d, *J* = 8.7 Hz, 1H), 7.44 (t, *J* = 6.8 Hz, 2H), 7.38 – 7.27 (m, 5H), 7.02 (t, *J* = 7.6 Hz, 1H), 6.44 (s, 1H), 4.62 (d, *J* = 5.7 Hz, 2H), 1.31 (d, *J* = 4.9 Hz, 9H); <sup>13</sup>C NMR (101 MHz, CDCl<sub>3</sub>) δ 178.0, 169.2, 140.2, 137.9, 132.8, 129.1, 128.0, 128.0, 126.6, 122.7, 121.8, 120.8, 44.2, 40.4, 27.8; IR (neat) 2961, 1724, 1645, 1515, 1440, 1363, 1290, 754 cm<sup>-1</sup>; HRMS(ESI) *m/z*: Calcd for C<sub>19</sub>H<sub>23</sub>N<sub>2</sub>O<sub>2</sub> [M+H]<sup>+</sup>: 311.1754; Found 311.1755.

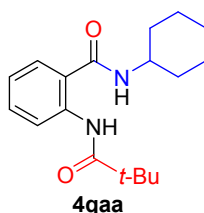

#### ***N*-Cyclohexyl-2-pivalamidobenzamide (4qaa)**

Compound **4qaa** was prepared following the general procedure using isocyanide **1q** (0.2 mmol, 21.8 mg), aniline **2a** (0.3 mmol, 65.7 mg) and carboxylic acid **3a** (0.3 mmol, 30.6 mg). Purification by flash column chromatography (silica gel, PE/EA = 10:1) afforded **4qaa** as a white solid (27.5 mg, 46%): m.p.: 136-137 °C; <sup>1</sup>H NMR (400 MHz, CDCl<sub>3</sub>) δ 11.19 (s, 1H), 8.59 (d, *J* = 8.3 Hz, 1H), 7.40 (dd, *J* = 8.1, 3.8 Hz, 2H), 7.01 (td, *J* = 7.6, 0.9 Hz, 1H), 6.03 (d, *J* = 6.4 Hz, 1H), 4.00 – 3.85 (m, 1H), 2.00 (dd, *J* = 12.3, 3.0 Hz, 2H), 1.79 – 1.69 (m, 2H), 1.69 – 1.62 (m, 1H), 1.49 – 1.35 (m, 2H), 1.30 (s, 9H), 1.29 – 1.13 (m, 3H); <sup>13</sup>C NMR (101 MHz, CDCl<sub>3</sub>) δ 178.0, 168.5, 140.1, 132.5, 126.4, 122.6, 121.8, 121.5, 48.9, 40.3, 33.2, 27.8, 25.7, 25.1; IR (neat) 2939, 1640, 1595, 1519, 1440, 754 cm<sup>-1</sup>; HRMS(ESI) *m/z*: Calcd for C<sub>18</sub>H<sub>27</sub>N<sub>2</sub>O<sub>2</sub> [M+H]<sup>+</sup>: 303.2067; Found 303.2067.

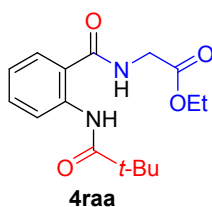

### Ethyl (2-pivalamidobenzoyl)glycinate (**4raa**)

Compound **4raa** was prepared following the general procedure using isocyanide **1r** (0.2 mmol, 23.4 mg), aniline **2a** (0.3 mmol, 65.7 mg) and carboxylic acid **3a** (0.3 mmol, 30.6 mg). Purification by flash column chromatography (silica gel, PE/EA = 5:1) afforded **4raa** brown oil (29.6 mg, 48%): <sup>1</sup>H NMR (400 MHz, CDCl<sub>3</sub>) δ 11.19 (s, 1H), 8.65 (d, *J* = 8.5 Hz, 1H), 7.54 – 7.50 (dd, *J* = 7.8, 1.2 Hz, 1H), 7.45 (td, *J* = 7.9, 1.2 Hz, 1H), 7.05 (td, *J* = 7.6, 1.0 Hz, 1H), 6.75 (s, 1H), 4.25 (q, *J* = 7.1 Hz, 2H), 4.18 (d, *J* = 5.0 Hz, 2H), 1.33 – 1.30 (s, 9H), 1.30 (t, *J* = 7.1 Hz, 3H); <sup>13</sup>C NMR (101 MHz, CDCl<sub>3</sub>) δ 178.0, 169.9, 169.3, 140.5, 133.2, 126.9, 122.7, 121.7, 119.8, 62.0, 42.1, 40.4, 27.8, 14.4; IR (neat) 2938, 1744, 1642, 1520, 1441, 1199, 754 cm<sup>-1</sup>; HRMS(ESI) *m/z*: Calcd for C<sub>16</sub>H<sub>23</sub>N<sub>2</sub>O<sub>4</sub> [M+H]<sup>+</sup>: 307.1652; Found 307.1652.

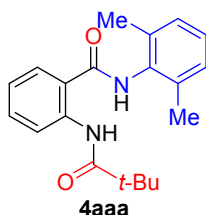

### *N*-(2,6-Dimethylphenyl)-2-pivalamidobenzamide (**4aaa**)

Compound **4aaa** was prepared following the general procedure using isocyanide **1a** (0.2 mmol, 26.2 mg), aniline **2a** (0.3 mmol, 65.7 mg) and carboxylic acid **3a** (0.3 mmol, 30.6 mg). Purification by flash column chromatography (silica gel, PE/EA = 5:1) afforded **4aaa** as a yellow solid (55.1 mg, 85%): m.p.: 189-191 °C; <sup>1</sup>H NMR (400 MHz, CDCl<sub>3</sub>) δ 11.10 (s, 1H), 8.63 (dd, *J* = 8.4, 0.7 Hz, 1H), 7.71 (dd, *J* = 7.8, 1.3 Hz, 1H), 7.59 – 7.41 (m, 2H), 7.21 – 7.07 (m, 4H), 2.27 (s, 6H), 1.25 (s, 9H); <sup>13</sup>C NMR (101 MHz, CDCl<sub>3</sub>) δ 178.1, 168.0, 140.3, 135.9, 133.4, 133.1, 128.7, 128.2, 126.9, 122.9, 122.0, 120.9, 40.3, 27.8, 18.7; IR (neat) 2957, 2922, 2856, 1655, 1515, 1445 cm<sup>-1</sup>; HRMS(ESI) *m/z*: Calcd for C<sub>20</sub>H<sub>24</sub>N<sub>2</sub>NaO<sub>2</sub> [M+Na]<sup>+</sup>: 347.1730; Found 347.1724.

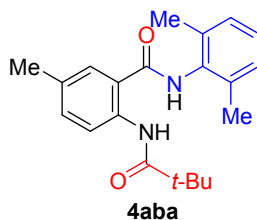

### *N*-(2,6-Dimethylphenyl)-5-methyl-2-pivalamidobenzamide (**4aba**)

Compound **4aba** was prepared following the general procedure using isocyanide **1a** (0.2 mmol, 26.2 mg), aniline **2b** (0.3 mmol, 69.9 mg) and carboxylic acid **3a** (0.3 mmol, 30.6 mg). Purification by

flash column chromatography (silica gel, PE/EA = 5:1) afforded **4aba** as a white solid (52.7 mg, 78%): m.p.: 156-157 °C; <sup>1</sup>H NMR (400 MHz, CDCl<sub>3</sub>) δ 10.94 (s, 1H), 8.55 – 8.46(m, 1H), 7.48 (s, 1H), 7.42 – 7.27 (m, 2H), 7.19 – 7.08 (m, 3H), 2.37 (s, 3H), 2.28 (s, 6H), 1.26 (s, 9H); <sup>13</sup>C NMR (101 MHz, CDCl<sub>3</sub>) δ 177.9, 168.1, 138.0, 136.0, 133.8, 133.5, 132.5, 128.7, 128.2, 127.0, 122.2, 121.0, 40.28, 27.83, 21.08, 18.66; IR (neat) 2957, 2922, 2856, 1655, 1515, 1445 cm<sup>-1</sup>; HRMS(ESI) *m/z*: Calcd for C<sub>21</sub>H<sub>27</sub>N<sub>2</sub>O<sub>2</sub> [M+H]<sup>+</sup>:339.2067; Found 339.2068.

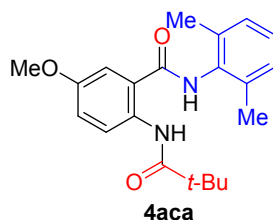

#### ***N*-(2,6-dimethylphenyl)-5-methoxy-2-pivalamidobenzamide (4aca)**

Compound **4aca** was prepared following the general procedure using isocyanide **1a** (0.2 mmol, 26.2 mg), aniline **2c** (0.3 mmol, 74.7 mg) and carboxylic acid **3a** (0.3 mmol, 30.6 mg). Purification by flash column chromatography (silica gel, PE/EA = 10:1 to 5:1) afforded **4aca** as a white solid (27.4 mg, 39%): m.p.: 177-179°C; <sup>1</sup>H NMR (400 MHz, CDCl<sub>3</sub>) δ 10.68 (s, 1H), 8.53 (d, *J* = 9.1 Hz, 1H), 7.39 (s, 1H), 7.21 (d, *J* = 2.3 Hz, 1H), 7.18 – 7.09 (m, 3H), 7.06 (dd, *J* = 9.1, 2.6 Hz, 1H), 3.84 (s, 3H), 2.27 (s, 6H), 1.25 (s, 9H); <sup>13</sup>C NMR (101 MHz, CDCl<sub>3</sub>) δ 177.7, 167.7, 155.1, 135.9, 133.5, 133.4, 128.7, 128.2, 123.8, 122.7, 117.2, 113.2, 56.0, 40.1, 27.8, 18.6; IR (neat) 2925, 2854, 1726, 1659, 1240, 739 cm<sup>-1</sup>; HRMS(ESI) *m/z*: Calcd for C<sub>21</sub>H<sub>27</sub>N<sub>2</sub>O<sub>3</sub> [M+H]<sup>+</sup>:355.2016; Found 355.2015.

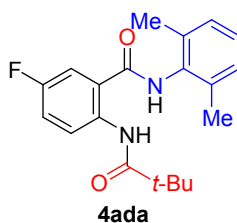

#### ***N*-(2,6-Dimethylphenyl)-5-fluoro-2-pivalamidobenzamide (4ada)**

Compound **4ada** was prepared following the general procedure using isocyanide **1a** (0.2 mmol, 26.2 mg), aniline **2d** (0.3 mmol, 71.1 mg) and carboxylic acid **3a** (0.3 mmol, 30.6 mg). Purification by flash column chromatography (silica gel, PE/EA = 5:1) afforded **4ada** as a white solid (51.1 mg, 75%): m.p.: 171-173 °C; <sup>1</sup>H NMR (400 MHz, CDCl<sub>3</sub>) δ 10.88 (s, 1H), 8.53 (dd, *J* = 9.1, 5.2 Hz, 1H), 7.69 (s, 1H), 7.40 (dd, *J* = 8.6, 2.6 Hz, 1H), 7.20 – 7.09(m, 4H), 2.26 (s, 6H), 1.23 (s, 9H); <sup>13</sup>C NMR (101 MHz, CDCl<sub>3</sub>) δ 178.1, 166.9, 157.8 (d, *J*<sub>C-F</sub> = 245.4 Hz), 136.5, 135.9, 133.3, 128.7, 128.3, 124.0 (d, *J*<sub>C-F</sub> = 7.1 Hz), 122.4 (d, *J*<sub>C-F</sub> = 6.1 Hz), 119.6 (d, *J*<sub>C-F</sub> = 22.2 Hz), 113.6 (d, *J*<sub>C-F</sub> = 24.2 Hz), 40.2, 27.7, 18.6; <sup>19</sup>F NMR (376 MHz, CDCl<sub>3</sub>) δ -118.34 to -118.44 (m, 1F); IR (neat) 2957, 2923, 2858, 1658, 1516, 1460, 771 cm<sup>-1</sup>; HRMS(ESI) *m/z*: Calcd for C<sub>20</sub>H<sub>24</sub>FN<sub>2</sub>O<sub>2</sub> [M+H]<sup>+</sup>:343.1816; Found 343.1816.

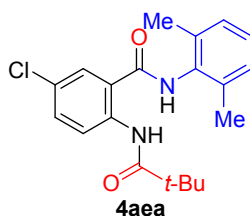

#### 5-Chloro-*N*-(2,6-dimethylphenyl)-2-pivalamidobenzamide (**4aea**)

Compound **4aea** was prepared following the general procedure using isocyanide **1a** (0.2 mmol, 26.2 mg), aniline **2e** (0.3 mmol, 76.0 mg) and carboxylic acid **3a** (0.3 mmol, 30.6 mg). Purification by flash column chromatography (silica gel, PE/EA = 15:1 to 10:1) afforded **4aea** as a white solid (41.7 mg, 58%): m.p.: 215-217 °C; <sup>1</sup>H NMR (400 MHz, CDCl<sub>3</sub>) δ 10.99 (s, 1H), 8.67 – 8.53 (m, 1H), 7.66 (s, 1H), 7.59 (d, *J* = 23.5 Hz, 1H), 7.49 – 7.39 (m, 1H), 7.21 – 7.09 (m, 3H), 2.27 (s, 6H), 1.24 (s, 9H); <sup>13</sup>C NMR (101 MHz, CDCl<sub>3</sub>) δ 178.2, 166.9, 139.0, 135.9, 133.2, 132.8, 128.7, 128.4, 127.9, 126.8, 123.5, 122.3, 40.4, 27.7, 18.6; IR (neat) 2924, 1725, 1655, 1264, 748 cm<sup>-1</sup>; HRMS(ESI) *m/z*: Calcd for C<sub>20</sub>H<sub>24</sub>ClN<sub>2</sub>O<sub>2</sub> [M+H]<sup>+</sup>: 359.1521; Found 359.1519.

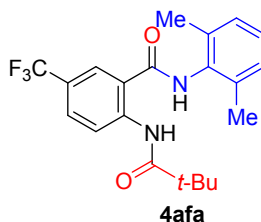

#### *N*-(2,6-Dimethylphenyl)-2-pivalamido-5-(trifluoromethyl)benzamide (**4afa**)

Compound **4afa** was prepared following the general procedure using isocyanide **1a** (0.2 mmol, 26.2 mg), aniline **2f** (0.3 mmol, 86.1 mg) and carboxylic acid **3a** (0.3 mmol, 30.6 mg). Purification by flash column chromatography (silica gel, PE/EA = 10:1) afforded **4afa** as a white solid (58.1 mg, 70%): m.p.: 196-197 °C; <sup>1</sup>H NMR (400 MHz, CDCl<sub>3</sub>) δ 11.28 (s, 1H), 8.79 (d, *J* = 8.8 Hz, 1H), 7.94 (s, 1H), 7.71 (d, *J* = 8.8 Hz, 1H), 7.66 (s, 1H), 7.22 – 7.10 (m, 3H), 2.28 (s, 6H), 1.25 (s, 9H); <sup>13</sup>C NMR (101 MHz, CDCl<sub>3</sub>) δ 178.51, 167.05, 143.45, 135.85, 133.10, 129.83 (q, *J*<sub>C-F</sub> = 4.0 Hz), 128.74, 128.43, 124.7 (q, *J*<sub>C-F</sub> = 33.3 Hz), 123.96 (q, *J*<sub>C-F</sub> = 3.0 Hz), 123.94 (q, *J*<sub>C-F</sub> = 272.7 Hz), 122.03, 120.63, 40.5, 27.6, 18.6; <sup>19</sup>F NMR (376 MHz, CDCl<sub>3</sub>) δ -62.06 (s, 3F); IR (neat) 2958, 2921, 2856, 1655, 1516, 1310, 765 cm<sup>-1</sup>; HRMS(ESI) *m/z*: Calcd for C<sub>21</sub>H<sub>24</sub>F<sub>3</sub>N<sub>2</sub>O<sub>2</sub><sup>+</sup> [M+H]<sup>+</sup>: 393.1784; Found 393.1781.

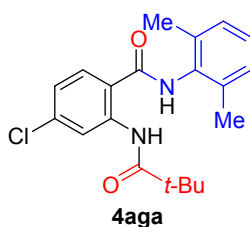

#### 4-Chloro-*N*-(2,6-dimethylphenyl)-2-pivalamidobenzamide (**4aga**)

Compound **4aga** was prepared following the general procedure using isocyanide **1a** (0.2 mmol, 26.2 mg), aniline **2g** (0.3 mmol, 76.0 mg) and carboxylic acid **3a** (0.3 mmol, 30.6 mg). Purification by

flash column chromatography (silica gel, PE/EA = 10:1) afforded **4aga** as a white solid (52.8 mg, 74%): m.p.: 173-175 °C; <sup>1</sup>H NMR (400 MHz, CDCl<sub>3</sub>) δ 11.23 (s, 1H), 8.75 (s, 1H), 7.73 – 7.44 (m, 2H), 7.21 – 7.09 (m, 3H), 7.05 (dd, *J* = 8.3, 1.5 Hz, 1H), 2.26 (s, 6H), 1.23 (s, 9H). <sup>13</sup>C NMR (101 MHz, CDCl<sub>3</sub>) δ 178.3, 167.4, 141.4, 139.2, 135.8, 133.2, 128.7, 128.3, 128.0, 122.9, 121.8, 118.8, 40.4, 27.6, 18.6; IR (neat) 2959, 2922, 2858, 1657, 1510, 1434, 773 cm<sup>-1</sup>; HRMS(ESI) *m/z*: Calcd for C<sub>20</sub>H<sub>23</sub>ClN<sub>2</sub>NaO<sub>2</sub> [M+Na]<sup>+</sup>:381.1340; Found 381.1336.

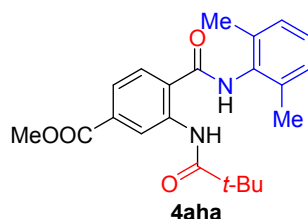

#### Methyl 4-((2,6-dimethylphenyl)carbamoyl)-3-pivalamidobenzoate (**4aha**)

Compound **4aha** was prepared following the general procedure using isocyanide **1a** (0.2 mmol, 26.2 mg), aniline **2h** (0.3 mmol, 83.1 mg) and carboxylic acid **3a** (0.3 mmol, 30.6 mg). Purification by flash column chromatography (silica gel, PE/EA = 10:1) afforded **4aha** as a white solid (55.8 mg, 73%): m.p.: 187-188 °C; <sup>1</sup>H NMR (400 MHz, CDCl<sub>3</sub>) δ 10.98 (s, 1H), 9.20 (dd, *J* = 4.9, 1.2 Hz, 1H), 7.95 (d, *J* = 28.0 Hz, 1H), 7.73 (d, *J* = 8.1 Hz, 1H), 7.68 – 7.61 (m, 1H), 7.14 (q, *J* = 5.7 Hz, 3H), 3.88 (s, 3H), 2.28 (s, 6H), 1.25 (s, 9H); <sup>13</sup>C NMR (101 MHz, CDCl<sub>3</sub>) δ 178.2, 167.4, 166.5, 140.2, 135.9, 133.9, 133.3, 128.7, 128.3, 127.1, 124.7, 123.8, 122.9, 52.6, 40.3, 27.7, 18.6; IR (neat) 2938, 1725, 1653, 1578, 1519, 1240, 761 cm<sup>-1</sup>; HRMS(ESI) *m/z*: Calcd for C<sub>22</sub>H<sub>27</sub>N<sub>2</sub>O<sub>4</sub> [M+H]<sup>+</sup>:383.1965; Found 383.1964.

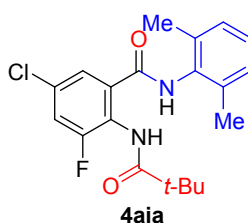

#### 5-Chloro-*N*-(2,6-dimethylphenyl)-3-fluoro-2-pivalamidobenzamide (**4aia**)

Compound **4aia** was prepared following the general procedure using isocyanide **1a** (0.2 mmol, 26.2 mg), aniline **2i** (0.3 mmol, 81.4 mg) and carboxylic acid **3a** (0.3 mmol, 30.6 mg). Purification by flash column chromatography (silica gel, PE/EA = 5:1) afforded **4aia** as a white solid (31.7 mg, 42%): m.p.: 219-220 °C; <sup>1</sup>H NMR (400 MHz, CDCl<sub>3</sub>) δ 8.79 (s, 1H), 7.65 (s, 1H), 7.45 (s, 1H), 7.28 – 7.24 (m, 1H), 7.12 (q, *J* = 6.2 Hz, 3H), 2.24 (s, 6H), 1.25 (s, 9H); <sup>13</sup>C NMR (101 MHz, CDCl<sub>3</sub>) δ 177.82, 165.07, 157.5 (d, *J*<sub>C-F</sub> = 258.6 Hz), 135.66, 133.08, 132.4 (d, *J*<sub>C-F</sub> = 2.0 Hz), 131.8 (d, *J*<sub>C-F</sub> = 10.1 Hz), 128.66, 128.23, 124.7 (d, *J*<sub>C-F</sub> = 14.1 Hz), 122.9 (d, *J*<sub>C-F</sub> = 3.0 Hz), 119.9 (d, *J*<sub>C-F</sub> = 25.3 Hz), 39.7, 27.7, 18.6; <sup>19</sup>F NMR (376 MHz, CDCl<sub>3</sub>) δ -110.46 to -110.54 (m, 1F); IR (neat) 2958, 2921, 2851, 1660, 1508, 1094 cm<sup>-1</sup>; HRMS(ESI) *m/z*: Calcd for C<sub>20</sub>H<sub>22</sub>ClFN<sub>2</sub>NaO<sub>2</sub> [M+Na]<sup>+</sup>: 399.1246; Found 399.1244.

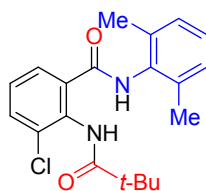

**4aja**

### 3-Chloro-*N*-(2,6-dimethylphenyl)-2-pivalamidobenzamide (**4aja**)

Compound **4aja** was prepared following the general procedure using isocyanide **1a** (0.2 mmol, 26.2 mg), aniline **2j** (0.3 mmol, 76.0 mg) and carboxylic acid **3a** (0.3 mmol, 30.6 mg). Purification by flash column chromatography (silica gel, PE/EA = 10:1 to 2:1) afforded **4aja** as a white solid (27.4 mg, 38%): m.p.: 205-206 °C; <sup>1</sup>H NMR (400 MHz, CDCl<sub>3</sub>) δ 8.37 (s, 1H), 7.73 (s, 1H), 7.58 (d, *J* = 7.6 Hz, 1H), 7.52 (d, *J* = 8.1 Hz, 1H), 7.27 – 7.20 (m, 1H), 7.15 – 7.05 (m, 3H), 2.25 (s, 6H), 1.26 (s, 9H); <sup>13</sup>C NMR (101 MHz, CDCl<sub>3</sub>) δ 178.0, 166.1, 135.6, 134.7, 133.7, 133.5, 133.2, 132.6, 128.6, 127.8, 127.5, 126.4, 39.7, 27.6, 18.7; IR (neat) 2956, 2921, 2854, 1656, 1462, 761 cm<sup>-1</sup>; HRMS(ESI) *m/z*: Calcd for C<sub>20</sub>H<sub>24</sub>ClN<sub>2</sub>O<sub>2</sub> [M+H]<sup>+</sup>:359.1521; Found 359.1521.

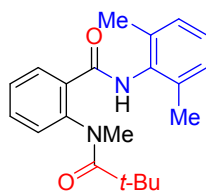

**4aka**

### *N*-(2,6-Dimethylphenyl)-2-(*N*-methylpivalamido)benzamide (**4aka**)

Compound **4aka** was prepared following the general procedure using isocyanide **1a** (0.2 mmol, 26.2 mg), aniline **2k** (0.3 mmol, 69.9 mg) and carboxylic acid **3a** (0.3 mmol, 30.6 mg). Purification by flash column chromatography (silica gel, PE/EA = 5:1 to 2:1) afforded **4aka** as a white solid (43.9 mg, 65%): m.p.: 185-187 °C; <sup>1</sup>H NMR (400 MHz, CDCl<sub>3</sub>) δ 7.95 (s, 2H), 7.51 (td, *J* = 7.6, 1.5 Hz, 1H), 7.43 (t, *J* = 7.5 Hz, 1H), 7.15 (d, *J* = 7.8 Hz, 1H), 7.11 – 7.06 (m, 3H), 3.39 (s, 3H), 2.28 (s, 6H), 1.20 (s, 9H); IR (neat) 2962, 2922, 1666, 1625, 1487, 1262, 741 cm<sup>-1</sup>; HRMS(ESI) *m/z*: Calcd for C<sub>21</sub>H<sub>27</sub>N<sub>2</sub>O<sub>2</sub> [M+H]<sup>+</sup>:339.2067; Found 339.2072.

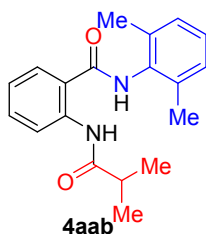

**4aab**

### *N*-(2,6-Dimethylphenyl)-2-isobutyramidobenzamide (**4aab**)

Compound **4aab** was prepared following the general procedure using isocyanide **1a** (0.2 mmol, 26.2 mg), aniline **2a** (0.3 mmol, 65.7 mg) and carboxylic acid **3b** (0.3 mmol, 26.43 mg). Purification by flash column chromatography (silica gel, PE/EA = 5:1) afforded **4aab** as a white solid (32.3 mg, 52%): m.p. 170-171 °C; <sup>1</sup>H NMR (400 MHz, CDCl<sub>3</sub>) δ 11.01 (s, 1H), 8.64 (d, *J* = 8.4 Hz, 1H), 7.72 (d, *J* = 7.8 Hz, 1H), 7.57 (s, 1H), 7.49 (t, *J* = 7.9 Hz, 1H), 7.19 – 7.08 (m, 4H), 2.56 – 2.44 (m, 1H),

2.27 (s, 6H), 1.19 (d,  $J = 6.9$  Hz, 6H).  $^{13}\text{C}$  NMR (101 MHz,  $\text{CDCl}_3$ )  $\delta$  176.4, 168.0, 140.5, 135.8, 133.5, 133.2, 128.7, 128.2, 126.8, 122.9, 122.1, 120.4, 37.4, 19.7, 18.6; IR (neat) 2957, 2922, 2856, 1647, 1513, 1440, 760  $\text{cm}^{-1}$ ; HRMS(ESI)  $m/z$ : Calcd for  $\text{C}_{19}\text{H}_{22}\text{N}_2\text{NaO}_2$   $[\text{M}+\text{Na}]^+$ : 333.1573; Found 333.1570.

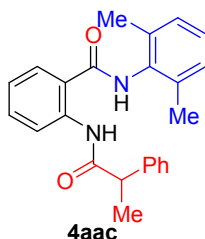

**(*RS*)-*N*-(2,6-Dimethylphenyl)-2-(2-phenylpropanamido)benzamide (4aac)**

Compound **4aac** was prepared following the general procedure using isocyanide **1a** (0.2 mmol, 26.2 mg), aniline **2a** (0.3 mmol, 65.7 mg) and carboxylic acid **3c** (0.3 mmol, 45.1 mg). Purification by flash column chromatography (silica gel, PE/EA = 5:1) afforded **4aac** as a colorless oil (48.6 mg, 65%):  $^1\text{H}$  NMR (400 MHz,  $\text{CDCl}_3$ )  $\delta$  11.08 (s, 1H), 8.55 (d,  $J = 8.4$  Hz, 1H), 7.82 (d,  $J = 10.0$  Hz, 1H), 7.68 (d,  $J = 7.7$  Hz, 1H), 7.40 (t,  $J = 7.8$  Hz, 1H), 7.32 (d,  $J = 7.3$  Hz, 2H), 7.28 – 7.24 (m, 2H), 7.22 – 7.10 (m, 4H), 7.04 (t,  $J = 7.5$  Hz, 1H), 3.63 (q,  $J = 7.0$  Hz, 1H), 2.19 (s, 6H), 1.52 (d,  $J = 7.1$  Hz, 3H);  $^{13}\text{C}$  NMR (101 MHz,  $\text{CDCl}_3$ )  $\delta$  173.2, 167.9, 141.13, 140.05, 135.9, 133.5, 132.9, 128.8, 128.5, 128.0, 127.6, 127.2, 127.0, 123.0, 121.7, 120.6, 48.9, 18.5, 18.4; IR (neat) 2958, 2922, 2855, 1681, 1513, 1440, 760  $\text{cm}^{-1}$ ; HRMS(ESI)  $m/z$ : Calcd for  $\text{C}_{24}\text{H}_{24}\text{N}_2\text{NaO}_2$   $[\text{M}+\text{Na}]^+$ : 395.1730; Found 395.1729.

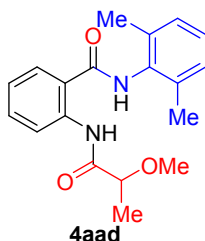

**(*RS*)-*N*-(2,6-Dimethylphenyl)-2-(2-methoxypropanamido)benzamide (4aad)**

Compound **4aad** was prepared following the general procedure using isocyanide **1a** (0.2 mmol, 26.2 mg), aniline **2a** (0.3 mmol, 65.7 mg) and carboxylic acid **3d** (0.3 mmol, 31.2 mg). Purification by flash column chromatography (silica gel, PE/EA = 10:1) afforded **4aad** as a yellow solid (27.5 mg, 41%): m.p. 147-149  $^{\circ}\text{C}$ ;  $^1\text{H}$  NMR (400 MHz,  $\text{CDCl}_3$ )  $\delta$  11.33 (s, 1H), 8.64 (t,  $J = 9.5$  Hz, 1H), 7.72 (d,  $J = 7.7$  Hz, 1H), 7.54 – 7.47 (m, 1H), 7.40 (s, 1H), 7.19 – 7.07 (m, 4H), 3.84 – 3.74 (m, 1H), 3.39 (d,  $J = 7.9$  Hz, 3H), 2.28 (d,  $J = 5.0$  Hz, 6H), 1.40 (t,  $J = 7.2$  Hz, 3H);  $^{13}\text{C}$  NMR (101 MHz,  $\text{CDCl}_3$ )  $\delta$  173.0, 167.3, 139.1, 135.9, 133.6, 132.9, 128.6, 128.0, 126.9, 123.5, 122.2, 122.1, 79.2, 58.1, 18.7, 18.6; IR (neat) 2955, 2923, 2856, 1658, 1514, 1444, 760  $\text{cm}^{-1}$ ; HRMS(ESI)  $m/z$ : Calcd for  $\text{C}_{19}\text{H}_{22}\text{N}_2\text{NaO}_3$   $[\text{M}+\text{Na}]^+$ : 349.1523; Found 349.1524.



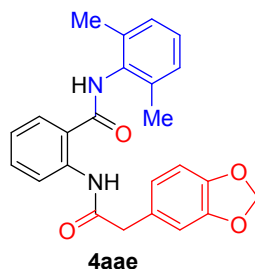

### 2-(2-(Benzo[*d*][1,3]dioxol-5-yl)acetamido)-*N*-(2,6-dimethylphenyl)benzamide (4aae)

Compound **4aae** was prepared following the general procedure using isocyanide **1a** (0.2 mmol, 26.2 mg), aniline **2a** (0.3 mmol, 65.7 mg) and carboxylic acid **3e** (0.3 mmol, 54.1 mg). Purification by flash column chromatography (silica gel, PE/EA = 10:1) afforded **4aae** as a white solid (37.0 mg, 46%): m.p.: 166-168 °C; <sup>1</sup>H NMR (400 MHz, CDCl<sub>3</sub>) δ 10.97 (s, 1H), 8.61 (d, *J* = 8.4 Hz, 1H), 7.67 (d, *J* = 7.8 Hz, 1H), 7.51 – 7.45 (m, 2H), 7.20 – 7.08 (m, 4H), 6.78 (s, 1H), 6.75 – 6.67 (m, 2H), 5.82 (s, 2H), 3.54 (s, 2H), 2.23 (s, 6H); <sup>13</sup>C NMR (101 MHz, CDCl<sub>3</sub>) δ 170.3, 167.7, 148.2, 147.0, 140.1, 135.9, 133.4, 133.2, 128.6, 128.4, 128.1, 126.8, 123.2, 122.8, 122.0, 120.6, 109.9, 108.7, 101.2, 45.4, 18.6; IR (neat) 2955, 2920, 2853, 1678, 1504, 1449, 1160, 755 cm<sup>-1</sup>; HRMS(ESI) *m/z*: Calcd for C<sub>24</sub>H<sub>23</sub>N<sub>2</sub>O<sub>4</sub> [M+H]<sup>+</sup>: 403.1652; Found 403.1653.

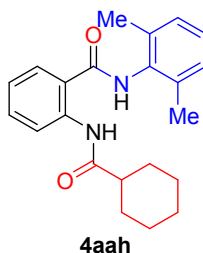

### 2-(Cyclohexanecarboxamido)-*N*-(2,6-dimethylphenyl)benzamide (4aah)

Compound **4aah** was prepared following the general procedure using isocyanide **1a** (0.2 mmol, 26.2 mg), aniline **2a** (0.3 mmol, 65.7 mg) and carboxylic acid **3h** (0.3 mmol, 38.5 mg). Purification by flash column chromatography (silica gel, PE/EA = 5:1) afforded **4aah** as a white solid (62.4 mg, 89%): m.p.: 173-175 °C; <sup>1</sup>H NMR (400 MHz, CDCl<sub>3</sub>) δ 11.03 (s, 1H), 8.72 (d, *J* = 8.4 Hz, 1H), 7.78 (d, *J* = 7.8 Hz, 1H), 7.63 (s, 1H), 7.55 (t, *J* = 7.9 Hz, 1H), 7.27 – 7.14 (m, 4H), 2.34 (s, 6H), 2.33 – 2.24 (m, 1H), 1.98 (d, *J* = 12.0 Hz, 2H), 1.82 (d, *J* = 12.0 Hz, 2H), 1.69 (d, *J* = 12.9 Hz, 1H), 1.54 (t, *J* = 12.0 Hz, 2H), 1.37 – 1.19 (m, 3H); <sup>13</sup>C NMR (101 MHz, CDCl<sub>3</sub>) δ 175.6, 168.0, 140.6, 135.8, 133.5, 133.2, 128.7, 128.2, 126.9, 122.9, 122.1, 120.4, 47.1, 29.8, 25.90, 25.87, 18.6; IR (neat) 2925, 2855, 1764, 1649, 1513, 1440, 1242, 758 cm<sup>-1</sup>; HRMS(ESI) *m/z*: Calcd for C<sub>22</sub>H<sub>26</sub>N<sub>2</sub>NaO<sub>2</sub> [M+Na]<sup>+</sup>: 373.1886; Found 373.1878.

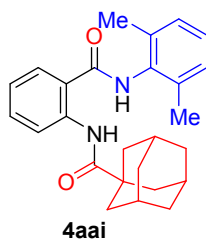

**(3*r*,5*r*,7*r*)-*N*-(2-((2,6-Dimethylphenyl)carbamoyl)phenyl)adamantane-1-carboxamide (4aai)**

Compound **4aai** was prepared following the general procedure using isocyanide **1a** (0.2 mmol, 26.2 mg), aniline **2a** (0.3 mmol, 65.7 mg) and carboxylic acid **3i** (0.3 mmol, 54.1 mg). Purification by flash column chromatography (silica gel, PE/EA = 5:1) afforded **4aai** as a yellow oil (79.5 mg, 99%): m.p.: 219-221 °C; <sup>1</sup>H NMR (400 MHz, CDCl<sub>3</sub>) δ 10.89 (s, 1H), 8.67 (d, *J* = 8.4 Hz, 1H), 7.69 (d, *J* = 7.8 Hz, 1H), 7.51 (t, *J* = 7.9 Hz, 1H), 7.35 (s, 1H), 7.20 – 7.09 (m, 4H), 2.30 (s, 6H), 2.04 (s, 3H), 1.95 (s, 6H), 1.71 (s, 6H); <sup>13</sup>C NMR (101 MHz, CDCl<sub>3</sub>) δ 177.7, 168.0, 140.3, 136.0, 133.5, 133.0, 128.7, 128.2, 126.8, 122.9, 122.4, 121.4, 42.3, 39.3, 36.7, 28.4, 18.7; IR (neat) 2913, 2853, 1650, 1513, 1440, 1372, 759 cm<sup>-1</sup>; HRMS(ESI) *m/z*: Calcd for C<sub>26</sub>H<sub>31</sub>N<sub>2</sub>O<sub>2</sub> [M+H]<sup>+</sup>: 403.2380; Found 403.2379.

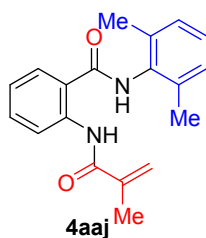

***N*-(2,6-Dimethylphenyl)-2-methacrylamidobenzamide (4aaj)**

Compound **4aaj** was prepared following the general procedure using isocyanide **1a** (0.2 mmol, 26.2 mg), aniline **2a** (0.3 mmol, 65.7 mg) and carboxylic acid **3j** (0.3 mmol, 25.8 mg). Purification by flash column chromatography (silica gel, PE/EA = 5:1) afforded **4aaj** as a white solid (45.7 mg, 74%): m.p.: 173-175 °C; <sup>1</sup>H NMR (400 MHz, CDCl<sub>3</sub>) δ 11.47 (s, 1H), 8.72 (d, *J* = 8.4 Hz, 1H), 7.73 (dd, *J* = 7.8, 1.1 Hz, 1H), 7.59 – 7.40 (m, 2H), 7.22 – 7.05 (m, 4H), 5.91 (s, 1H), 5.43 (s, 1H), 2.27 (s, 6H), 2.02 (s, 3H); <sup>13</sup>C NMR (101 MHz, CDCl<sub>3</sub>) δ 167.9, 167.1, 140.5, 140.4, 135.8, 133.3, 128.7, 128.2, 126.9, 123.1, 122.0, 121.5, 120.5, 18.8, 18.7. (one carbon missing due to overlap); IR (neat) 2956, 2924, 2856, 1675, 1594, 1515, 1441 cm<sup>-1</sup>; HRMS(ESI) *m/z*: Calcd for C<sub>19</sub>H<sub>20</sub>N<sub>2</sub>NaO<sub>2</sub> [M+Na]<sup>+</sup>: 331.1417; Found 331.1416.

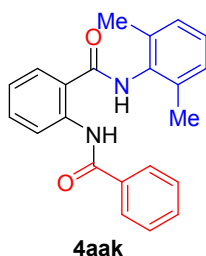

**2-Benzamido-*N*-(2,6-dimethylphenyl)benzamide (4aak)**

Compound **4aak** was prepared following the general procedure using isocyanide **1a** (0.2 mmol, 26.2

mg), aniline **2a** (0.3 mmol, 65.7 mg) and carboxylic acid **3k** (0.3 mmol, 36.6 mg). Purification by flash column chromatography (silica gel, PE/EA = 5:1) afforded **4aak** as a light white solid (36.6 mg, 53%): m.p.: 206-208 °C; <sup>1</sup>H NMR (400 MHz, CDCl<sub>3</sub>) δ 12.00 (s, 1H), 8.86 (d, *J* = 8.4 Hz, 1H), 8.05 – 7.91 (m, 2H), 7.78 (d, *J* = 7.8 Hz, 1H), 7.58 (t, *J* = 7.8 Hz, 2H), 7.52 – 7.38 (m, 3H), 7.22 – 7.10 (m, 4H), 2.28 (s, 6H); <sup>13</sup>C NMR (101 MHz, CDCl<sub>3</sub>) δ 168.1, 165.9, 140.6, 135.9, 134.7, 133.5, 133.4, 132.1, 129.0, 128.7, 128.2, 127.6, 127.0, 123.2, 122.1, 120.4, 18.7; IR (neat) 3271, 2922, 1652, 1511, 1435, 755 cm<sup>-1</sup>; HRMS(ESI) *m/z*: Calcd for C<sub>22</sub>H<sub>20</sub>N<sub>2</sub>NaO<sub>2</sub> [M+Na]<sup>+</sup>: 367.1417; Found 367.1415.

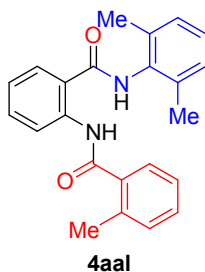

#### ***N*-(2,6-Dimethylphenyl)-2-(2-methylbenzamido)benzamide (4aal)**

Compound **4aal** was prepared following the general procedure using isocyanide **1a** (0.2 mmol, 26.2 mg), aniline **2a** (0.3 mmol, 65.7 mg) and carboxylic acid **3l** (0.3 mmol, 40.9 mg). Purification by flash column chromatography (silica gel, PE/EA = 5:1) afforded **4aal** as a light white solid (47.8 mg, 64%): m.p.: 187-189 °C; <sup>1</sup>H NMR (400 MHz, DMSO) δ 11.55 (s, 1H), 10.08 (s, 1H), 8.61 (d, *J* = 8.2 Hz, 1H), 8.06 (dd, *J* = 7.9, 1.1 Hz, 1H), 7.64 (td, *J* = 7.9, 1.2 Hz, 1H), 7.49 (d, *J* = 7.6 Hz, 1H), 7.41 – 7.35 (m, 1H), 7.33 – 7.26 (m, 3H), 7.15 – 7.09 (m, 3H) 2.43 (s, 3H), 2.19 (s, 6H); <sup>13</sup>C NMR (101 MHz, DMSO) δ 167.19, 167.15, 139.2, 136.3, 135.7, 135.5, 134.5, 132.3, 131.1, 130.2, 128.4, 127.8, 126.9, 126.6, 126.0, 123.2, 121.0, 120.7, 19.49, 17.85; IR (neat) 3056, 2983, 1675, 1126, 756 cm<sup>-1</sup>; HRMS(ESI) *m/z*: Calcd for C<sub>23</sub>H<sub>22</sub>N<sub>2</sub>O<sub>3</sub> [M+H]<sup>+</sup>: 359.1754; Found 359.1749.

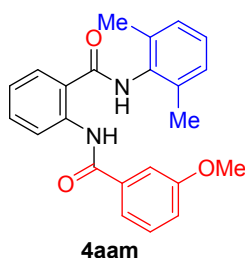

#### ***N*-(2,6-Dimethylphenyl)-2-(3-methoxybenzamido)benzamide (4aam)**

Compound **4aam** was prepared following the general procedure using isocyanide **1a** (0.2 mmol, 26.2 mg), aniline **2a** (0.3 mmol, 65.7 mg) and carboxylic acid **3m** (0.3 mmol, 45.6 mg). Purification by flash column chromatography (silica gel, PE/EA = 5:1 to 3:1) afforded **4aam** as a white solid (48.7 mg, 65%): m.p.: 161-162 °C; <sup>1</sup>H NMR (400 MHz, CDCl<sub>3</sub>) δ 11.95 (s, 1H), 8.83 (d, *J* = 8.4 Hz, 1H), 7.77 (d, *J* = 7.6 Hz, 1H), 7.60 – 7.53 (m, 3H), 7.49 (d, *J* = 7.7 Hz, 1H), 7.31 (t, *J* = 7.9 Hz, 1H), 7.19 – 7.10 (m, 4H), 7.02 (dd, *J* = 8.2, 2.0 Hz, 1H), 3.81 (s, 3H), 2.27 (s, 6H); <sup>13</sup>C NMR (101 MHz, CDCl<sub>3</sub>) δ 168.2, 165.8, 160.2, 140.6, 136.4, 135.9, 133.5, 133.4, 130.0, 128.7, 128.2, 127.0, 123.3,

122.2, 120.6, 119.4, 118.6, 112.8, 55.60, 18.68; IR (neat) 2956, 2922, 2853, 1649, 1514, 1444, 1278, 755  $\text{cm}^{-1}$ ; HRMS(ESI)  $m/z$ : Calcd for  $\text{C}_{23}\text{H}_{22}\text{N}_2\text{NaO}_3$   $[\text{M}+\text{Na}]^+$ : 397.1523; Found 379.1514.

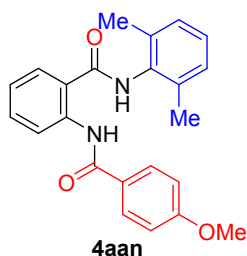

#### ***N*-(2,6-Dimethylphenyl)-2-(4-methoxybenzamido)benzamide (4aan)**

Compound **4aan** was prepared following the general procedure using isocyanide **1a** (0.2 mmol, 26.2 mg), aniline **2a** (0.3 mmol, 65.7 mg) and carboxylic acid **3n** (0.3 mmol, 45.6 mg). Purification by flash column chromatography (silica gel, PE/EA = 5:1 to 3:1) afforded **4aan** as a white solid (60.6 mg, 81%); m.p.: 209-210 °C;  $^1\text{H}$  NMR (400 MHz,  $\text{CDCl}_3$ )  $\delta$  11.90 (s, 1H), 8.85 (d,  $J = 7.8$  Hz, 1H), 8.01 – 7.89 (m, 2H), 7.76 (dd,  $J = 7.8, 1.2$  Hz, 1H), 7.65 – 7.53 (m, 1H), 7.50 (s, 1H), 7.21 – 7.09 (m, 4H), 6.97 – 6.81 (m, 2H), 3.82 (s, 3H), 2.28 (s, 6H);  $^{13}\text{C}$  NMR (101 MHz,  $\text{CDCl}_3$ )  $\delta$  168.2, 165.5, 162.7, 140.7, 135.9, 133.5, 133.3, 129.5, 128.6, 128.1, 127.1, 127.0, 122.9, 121.9, 120.2, 114.1, 55.6, 18.7; IR (neat) 2956, 2922, 2854, 1648, 1509, 1411, 761  $\text{cm}^{-1}$ ; HRMS(ESI)  $m/z$ : Calcd for  $\text{C}_{23}\text{H}_{22}\text{N}_2\text{NaO}_3$   $[\text{M}+\text{Na}]^+$ : 397.1523; Found 397.1517.

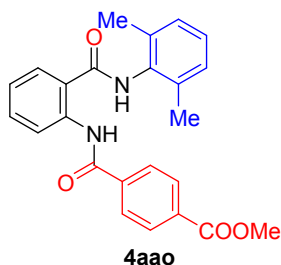

#### **Methyl 4-((2-((2,6-dimethylphenyl)carbamoyl)phenyl)carbamoyl)benzoate (4aao)**

Compound **4aao** was prepared following the general procedure using isocyanide **1a** (0.3 mmol, 39.4 mg), aniline **2a** (0.45 mmol, 98.6 mg) and carboxylic acid **3o** (0.3 mmol, 81.1 mg). Purification on a Biotage prep-HPLC with UV detector and Biotage<sup>®</sup> Sfar C-18 D-Duo 100Å, 30 $\mu\text{m}$  (CV 17 mL, Capacity 100-1000 mg) to afforded **4aap** as a white solid (33.5 mg, 28%); m.p.: 250-251 °C;  $^1\text{H}$  NMR (400 MHz,  $\text{CDCl}_3$ )  $\delta$  12.15 (s, 1H), 8.87 (d,  $J = 8.4$  Hz, 1H), 8.06 (dd,  $J = 22.8, 8.4$  Hz, 4H), 7.79 (d,  $J = 7.8$  Hz, 1H), 7.60 (t,  $J = 7.9$  Hz, 1H), 7.55 (s, 1H), 7.23 – 7.09 (m, 4H), 3.91 (s, 3H), 2.28 (s, 6H);  $^{13}\text{C}$  NMR (101 MHz,  $\text{CDCl}_3$ )  $\delta$  168.1, 166.6, 164.9, 140.6, 138.7, 135.9, 133.6, 133.3, 133.2, 130.2, 128.8, 128.3, 127.7, 127.0, 123.6, 122.2, 120.4, 52.6, 18.7; IR (neat) 2953, 2923, 2851, 1726, 1649, 1440, 1281, 757  $\text{cm}^{-1}$ ; HRMS(ESI)  $m/z$ : Calcd for  $\text{C}_{24}\text{H}_{23}\text{N}_2\text{O}_4$   $[\text{M}+\text{H}]^+$ : 403.1652; Found 403.1651.

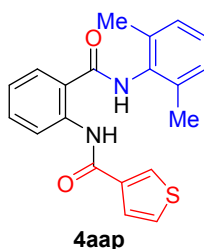

***N*-(2-((2,6-Dimethylphenyl)carbamoyl)phenyl)thiophene-3-carboxamide (4aap)**

Compound **4aap** was prepared following the general procedure using isocyanide **1a** (0.2 mmol, 26.2 mg), aniline **2a** (0.3 mmol, 65.7 mg) and carboxylic acid **3p** (0.3 mmol, 38.4 mg). Purification by flash column chromatography (silica gel, PE/EA = 10:1) afforded **4aap** as a yellow solid (23.1 mg, 33%): m.p.: 235-237 °C; <sup>1</sup>H NMR (400 MHz, CDCl<sub>3</sub>) δ 11.93 (s, 1H), 8.84 (d, *J* = 8.4 Hz, 1H), 8.04 (s, 1H), 7.76 (d, *J* = 7.8 Hz, 1H), 7.58 (t, *J* = 6.0 Hz, 2H), 7.51 (s, 1H), 7.31 – 7.27 (m, 1H), 7.21 – 7.11 (m, 4H), 2.29 (s, 6H); <sup>13</sup>C NMR (101 MHz, CDCl<sub>3</sub>) δ 168.2, 161.5, 140.8, 138.4, 135.9, 133.51, 133.46, 129.7, 128.7, 128.2, 127.0, 126.8, 126.7, 123.1, 121.9, 119.9, 18.7; IR (neat) 2957, 2921, 2852, 1675, 1511, 1443, 760, cm<sup>-1</sup>; HRMS(ESI) *m/z*: Calcd for C<sub>20</sub>H<sub>18</sub>N<sub>2</sub>NaO<sub>2</sub>S [M+Na]<sup>+</sup>: 373.0981; Found 373.0977.

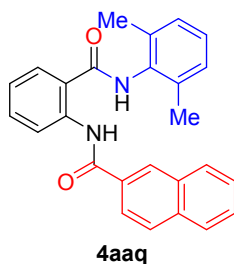

***N*-(2-((2,6-Dimethylphenyl)carbamoyl)phenyl)-2-naphthamide (4aaq)**

Compound **4aaq** was prepared following the general procedure using isocyanide **1a** (0.2 mmol, 26.2 mg), aniline **2a** (0.3 mmol, 65.7 mg) and carboxylic acid **3q** (0.3 mmol, 51.7 mg). Purification by flash column chromatography (silica gel, PE/EA = 5:1) afforded **4aaq** as a white solid (42.9 mg, 54%): m.p.: 195-197 °C; <sup>1</sup>H NMR (400 MHz, CDCl<sub>3</sub>) δ 12.09 (s, 1H), 8.91 (d, *J* = 8.4 Hz, 1H), 8.52 (s, 1H), 8.02 (d, *J* = 8.6 Hz, 1H), 7.95 (d, *J* = 7.8 Hz, 1H), 7.86 (dd, *J* = 15.5, 8.3 Hz, 2H), 7.79 (d, *J* = 7.8 Hz, 1H), 7.62 (t, *J* = 7.8 Hz, 1H), 7.57 – 7.47 (m, 3H), 7.23 – 7.11 (m, 4H), 2.30 (s, 6H); <sup>13</sup>C NMR (101 MHz, CDCl<sub>3</sub>) δ 168.1, 166.0, 140.7, 135.9, 135.2, 133.5, 133.4, 133.0, 132.1, 129.7, 128.9, 128.7, 128.2, 128.0, 127.9, 126.9, 126.8, 123.9, 123.3, 122.4, 120.7, 18.7 (one carbon missing due to overlap); IR (neat) 2955, 2922, 2856, 1661, 1511, 1438, 1318, 763 cm<sup>-1</sup>; HRMS(ESI) *m/z*: Calcd for C<sub>26</sub>H<sub>23</sub>N<sub>2</sub>O<sub>2</sub> [M+H]<sup>+</sup>: 395.1754; Found 395.1755.

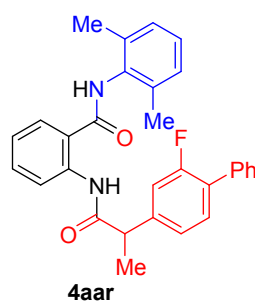

**(*RS*)-*N*-(2,6-Dimethylphenyl)-2-(2-(2-fluoro-[1,1'-biphenyl]-4-yl)propanamido)benzamide (4aar)**

Compound **4aar** was prepared following the general procedure using isocyanide **1a** (0.2 mmol, 26.2 mg), aniline **2a** (0.3 mmol, 65.7 mg) and carboxylic acid **3r** (0.3 mmol, 73.3 mg). Purification by flash column chromatography (silica gel, PE/EA = 5:1) afforded **4aar** as a white solid (53.7 mg, 58%): m.p.: 127-128 °C; <sup>1</sup>H NMR (400 MHz, CDCl<sub>3</sub>) δ 11.16 (s, 1H), 8.65 (d, *J* = 8.4 Hz, 1H), 7.68 (d, *J* = 7.8 Hz, 1H), 7.53 – 7.43 (m, 4H), 7.40 (t, *J* = 7.6 Hz, 2H), 7.33 (t, *J* = 7.7 Hz, 2H), 7.22 – 7.08 (m, 6H), 3.70 (q, *J* = 7.1 Hz, 1H), 2.21 (s, 6H), 1.58 (d, *J* = 7.0 Hz, 3H); <sup>13</sup>C NMR (101 MHz, CDCl<sub>3</sub>) δ 172.7, 167.8, 160.0 (d, *J*<sub>C-F</sub> = 249.5 Hz), 142.6 (d, *J*<sub>C-F</sub> = 7.1 Hz), 140.2, 135.9, 133.4, 133.3, 131.14, 131.11, 129.18, 129.16, 128.7, 128.6, 128.2, 128.1 (d, *J*<sub>C-F</sub> = 14.1 Hz), 127.8, 126.8, 123.8 (d, *J*<sub>C-F</sub> = 3.0 Hz), 123.2, 122.0, 120.5, 115.4 (d, *J*<sub>C-F</sub> = 23.2 Hz), 48.5, 18.6, 18.4; <sup>19</sup>F NMR (376 MHz, CDCl<sub>3</sub>) δ -117.25 to -117.46 (m, 1F); IR (neat) 3956, 2922, 2854, 1665, 1513, 1441, 763 cm<sup>-1</sup>; HRMS(ESI) *m/z*: Calcd for C<sub>30</sub>H<sub>28</sub>FN<sub>2</sub>O<sub>2</sub> [M+H]<sup>+</sup>: 467.2129; Found 467.2130.

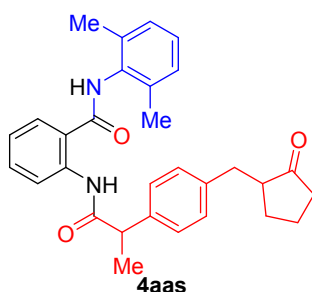

***N*-(2,6-Dimethylphenyl)-2-(2-(4-((2-oxocyclopentyl)methyl)phenyl)propanamido)benzamide (4aas)**

Compound **4aas** was prepared following the general procedure using isocyanide **1a** (0.2 mmol, 26.2 mg), aniline **2a** (0.3 mmol, 65.7 mg) and carboxylic acid **3s** (0.3 mmol, 73.9 mg). Purification by flash column chromatography (silica gel, PE/EA = 5:1 to 3:1) afforded **4aas** as a colorless oil (59.9 mg, 64%): <sup>1</sup>H NMR (400 MHz, CDCl<sub>3</sub>) δ 10.99 (s, 1H), 8.59 (d, *J* = 8.4 Hz, 1H), 7.68 (d, *J* = 7.6 Hz, 1H), 7.56 (d, *J* = 10.9 Hz, 1H), 7.45 (t, *J* = 7.8 Hz, 1H), 7.24 (d, *J* = 7.8 Hz, 2H), 7.20 – 7.07 (m, 4H), 7.05 (d, *J* = 7.8 Hz, 2H), 3.63 (q, *J* = 7.0 Hz, 1H), 3.06 (dd, *J* = 13.9, 3.7 Hz, 1H), 2.43 (dd, *J* = 13.8, 9.7 Hz, 1H), 2.33 – 2.23 (m, 2H), 2.21 (s, 6H), 2.12 – 1.97 (m, 2H), 1.95 – 1.84 (m, 1H), 1.68 (m, 1H), 1.52 (d, *J* = 7.0 Hz, 3H), 1.50 – 1.39 (m, 1H); <sup>13</sup>C NMR (101 MHz, CDCl<sub>3</sub>) δ 220.4, 173.4, 167.8, 140.2, 139.1, 139.0, 135.9, 133.5, 133.0, 129.4, 128.6, 128.1, 127.8, 126.9, 123.0, 121.9, 120.7, 51.2, 48.6, 38.3, 35.4, 29.4, 20.7, 18.6, 18.5; IR (neat) 2957, 2923, 2858, 1735, 1512, 1440, 761 cm<sup>-1</sup>; HRMS(ESI) *m/z*: Calcd for C<sub>30</sub>H<sub>32</sub>N<sub>2</sub>NaO<sub>3</sub> [M+Na]<sup>+</sup>: 491.2305; Found 491.2300.

### 3. Gram Scale Preparation of 4aaa

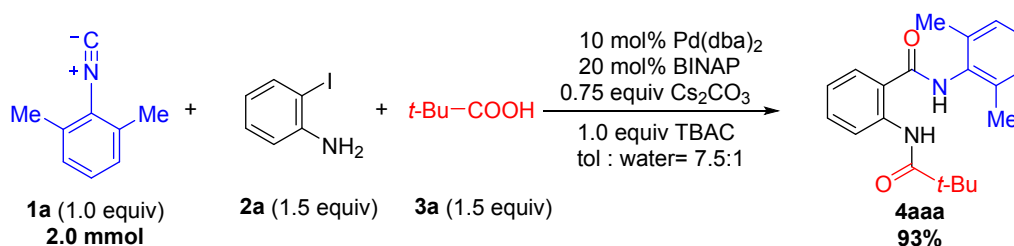

Pivalic acid **3a** (306.4 mg, 3.0 mmol, 1.5 equiv.) and Cs<sub>2</sub>CO<sub>3</sub> (488.7 mg, 1.5 mmol, 0.75 equiv.) were added to a solution of TBAC (555.8 g, 2.0 mmol, 1.0 equiv.) in water (4.0 mL). The resulting mixture was stirred at 80 °C for 0.5 h, then cooled down to room temperature (Solution A).

Under Ar atmosphere, to a 50 mL round flask were added Pd(dba)<sub>2</sub> (115.0 mg, 0.2 mmol, 10mol%) and BINAP (249.1 mg, 0.6 mmol, 20mol%) and toluene (10.0 mL). After stirring for 15 min at RT, 2-iodoaniline **2a** (657.1 mg, 3.0 mmol, 1.5 equiv.) was added followed by solution A. The resulting mixture was heated at 100 °C with stirring for 0.5 h by using an oil bath before a solution of 2-isocyanato-1,3-dimethylbenzene **1a** (262.4 mg, 2.0 mmol, 1.0 equiv.) in toluene (20.0 mL) was added over 2 hours by using a syringe pump. The reaction mixture was further stirred for 0.5 h at 100 °C.

The completed reaction was cooled down to RT, quenched with sat. NaCl (50 mL) and extracted with DCM (3 × 50 mL). The combined organic layers were dried (anhydrous MgSO<sub>4</sub>), filtered, and concentrated under reduced pressure. The residue was purified by flash column chromatography (silica gel, petroleum ether/EtOAc = 15:1, v/v) to afford **4aaa** (586.8 mg, 90%).

#### 4. References

- (1) T. Nanjo, C. Tsukano, Y. Takemoto, *Org. Lett.* 2012, **14**, 4270-4273.
- (2) J. Zakrzewski, B. Huras, A. Kielczewska, *Synthesis*, 2016, **48**, 85-96.
- (3) B. Janza, A. Studer, *Org. Lett.* 2006, **8**, 1875-1878.
- (4) Y. Wang, H. Wang, J. Peng, Q. Zhu, *Org. Lett.* 2011, **13**, 4604-4607.
- (5) Y. Yao, W.-H. Dong, X.-S. Gao, X.-M. Xie, Z.-G. Zhang, *Chem. Comm.* **2019**, 55, 11900-11903.
- (6) J. G. Polisar, J. R. Norton, *Tetrahedron*, 2012, **68**, 10236-1024.
- (7) C. J. Evoniuk, G. P. Gomes, M. Ly, F. D. White, I. V. Alabugin, *J. Org. Chem.* **2017**, 82, 4265-4278.
- (8) D. Riedel, T. Wurm, K. Graf, M. Rudolph, F. Rominger, S. K. Hashmi, *Adv. Syn. Catal.* 2015, **357**, 1515-1523.
- (9) B. Wang, D. He, B. Ren, T. Yao, *Chem. Comm.* 2020, **56**, 900-903.
- (10) A. Guijarro, D. J. Ramon, M. Yus, *Tetrahedron*, 1992, **49**, 469-82
- (11) P. Grammaticakis, *Bulletin de la Societe Chimique de France*, 1962, 487-496.



## 5. $^1\text{H}$ , $^{13}\text{C}$ and $^{19}\text{F}$ NMR Spectra

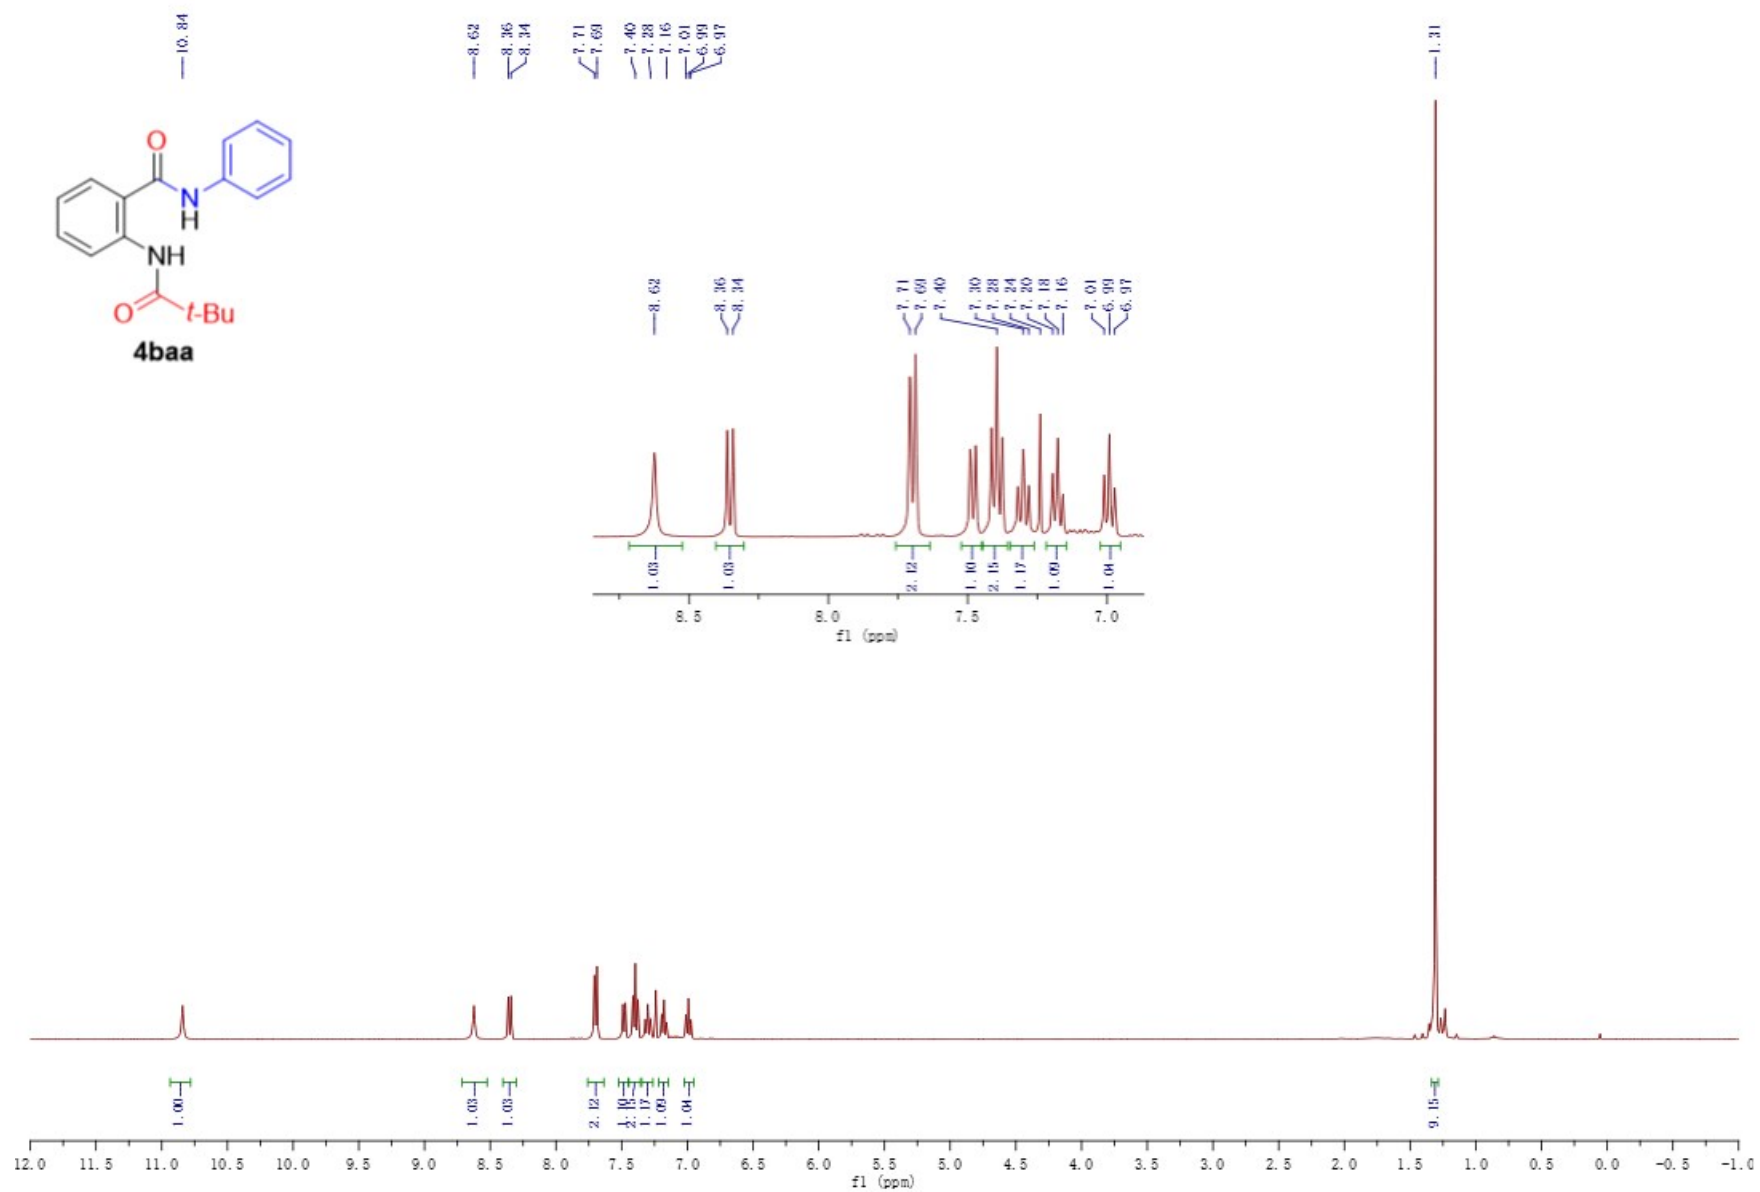

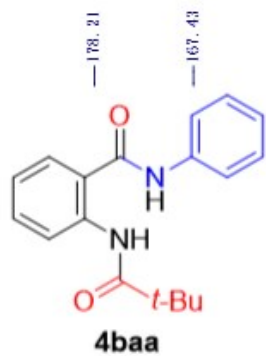

139.39  
137.99  
132.34  
129.33  
127.18  
124.99  
123.62  
122.30  
122.15  
120.71

40.21

27.77

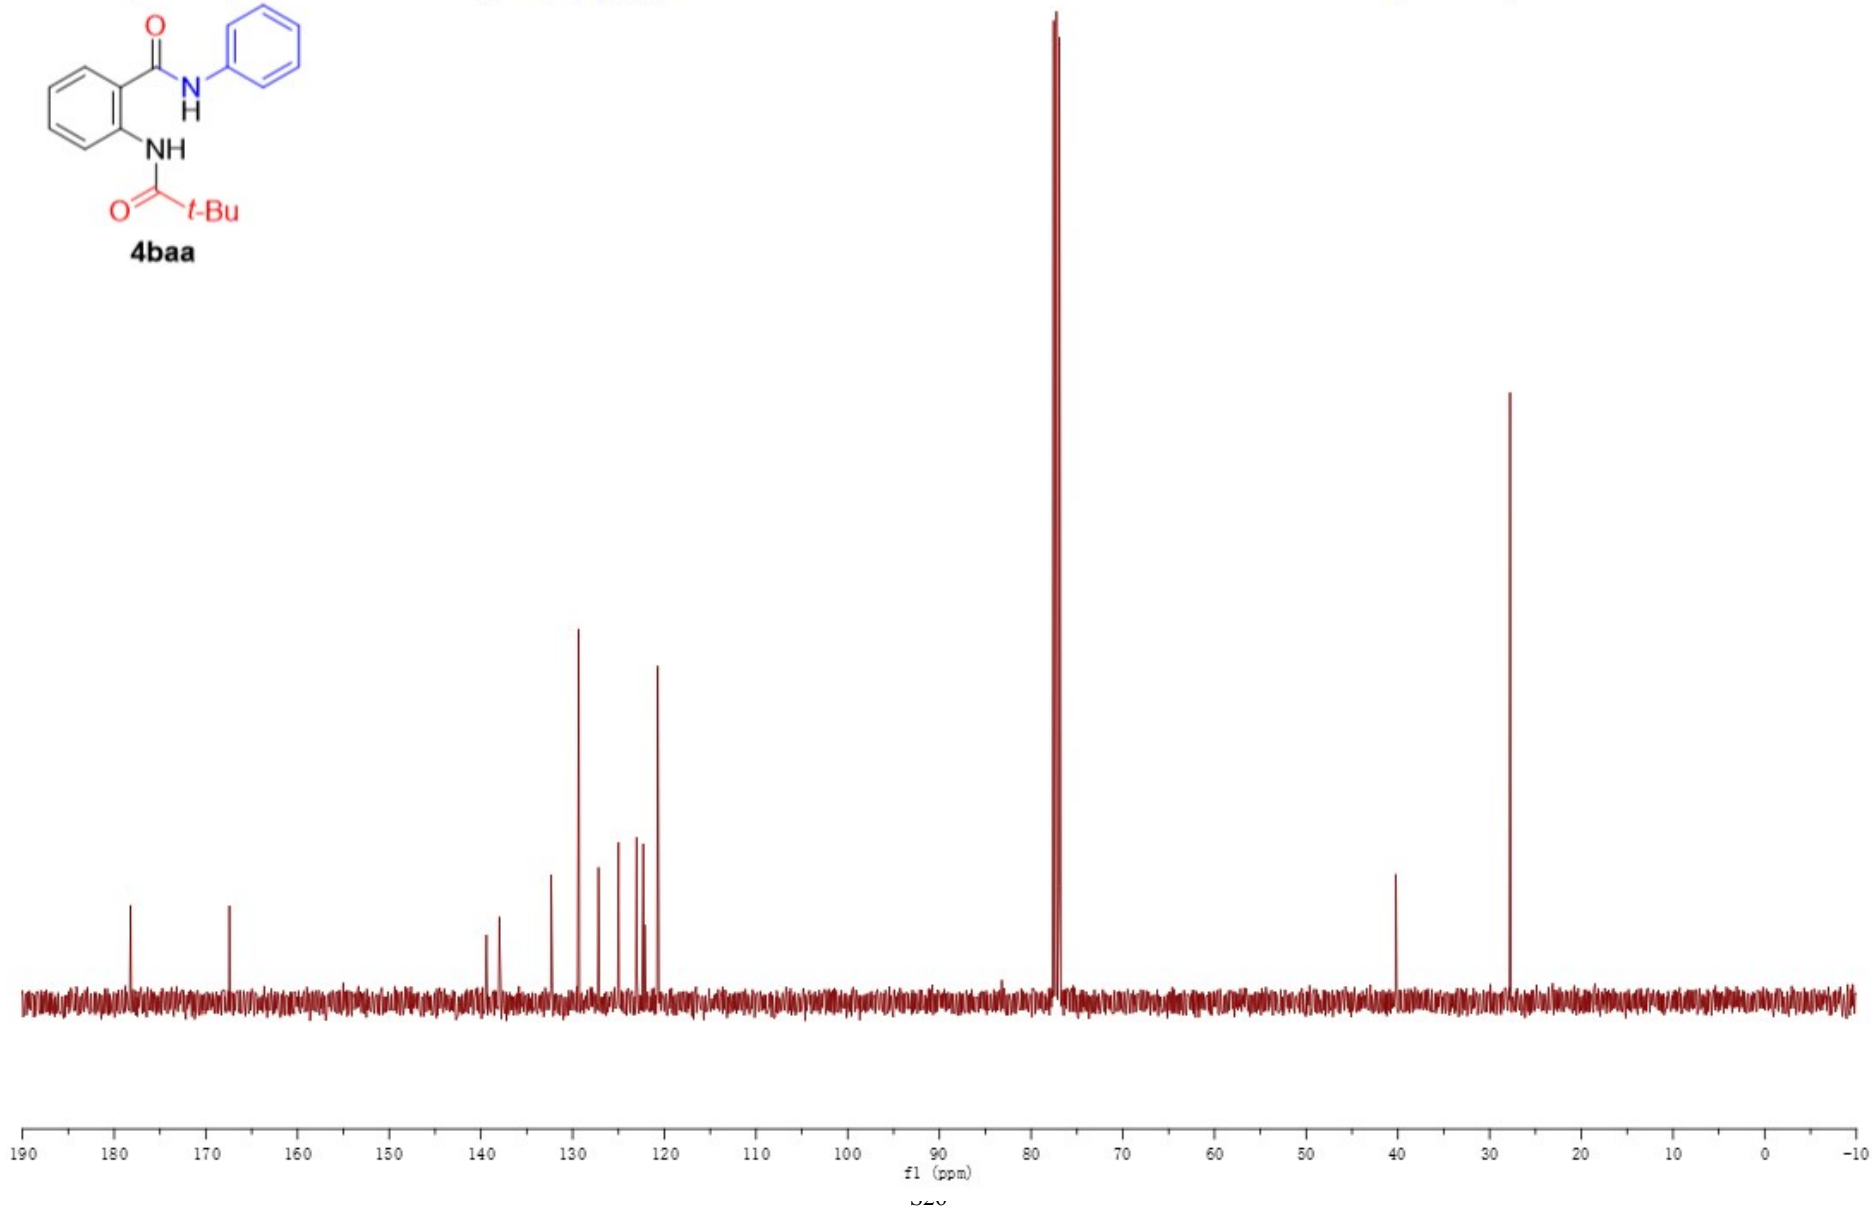

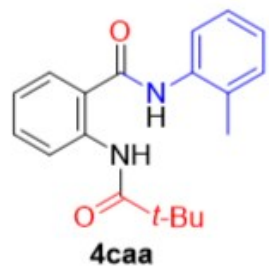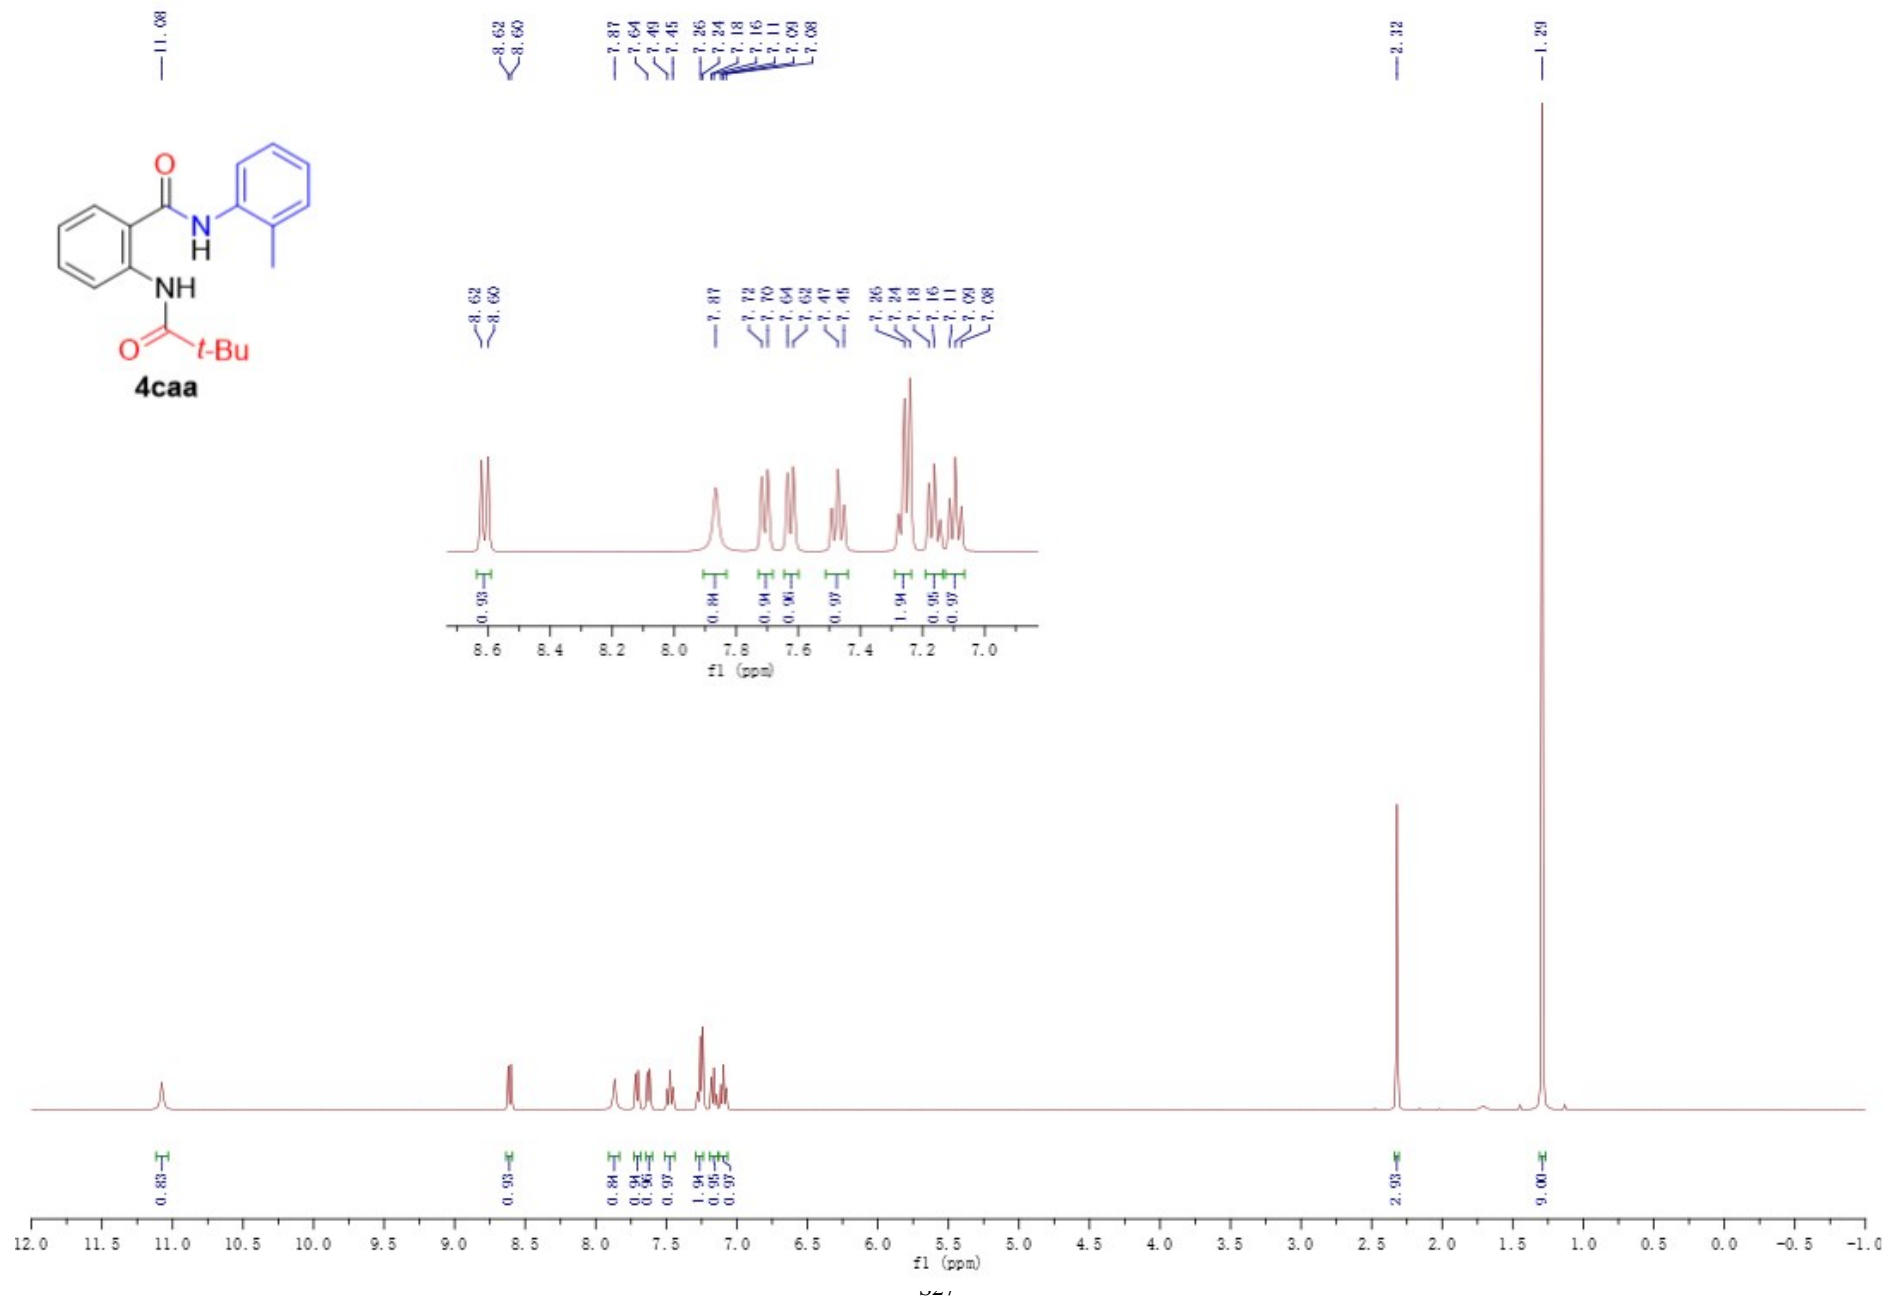

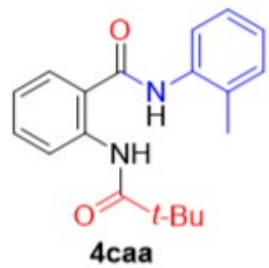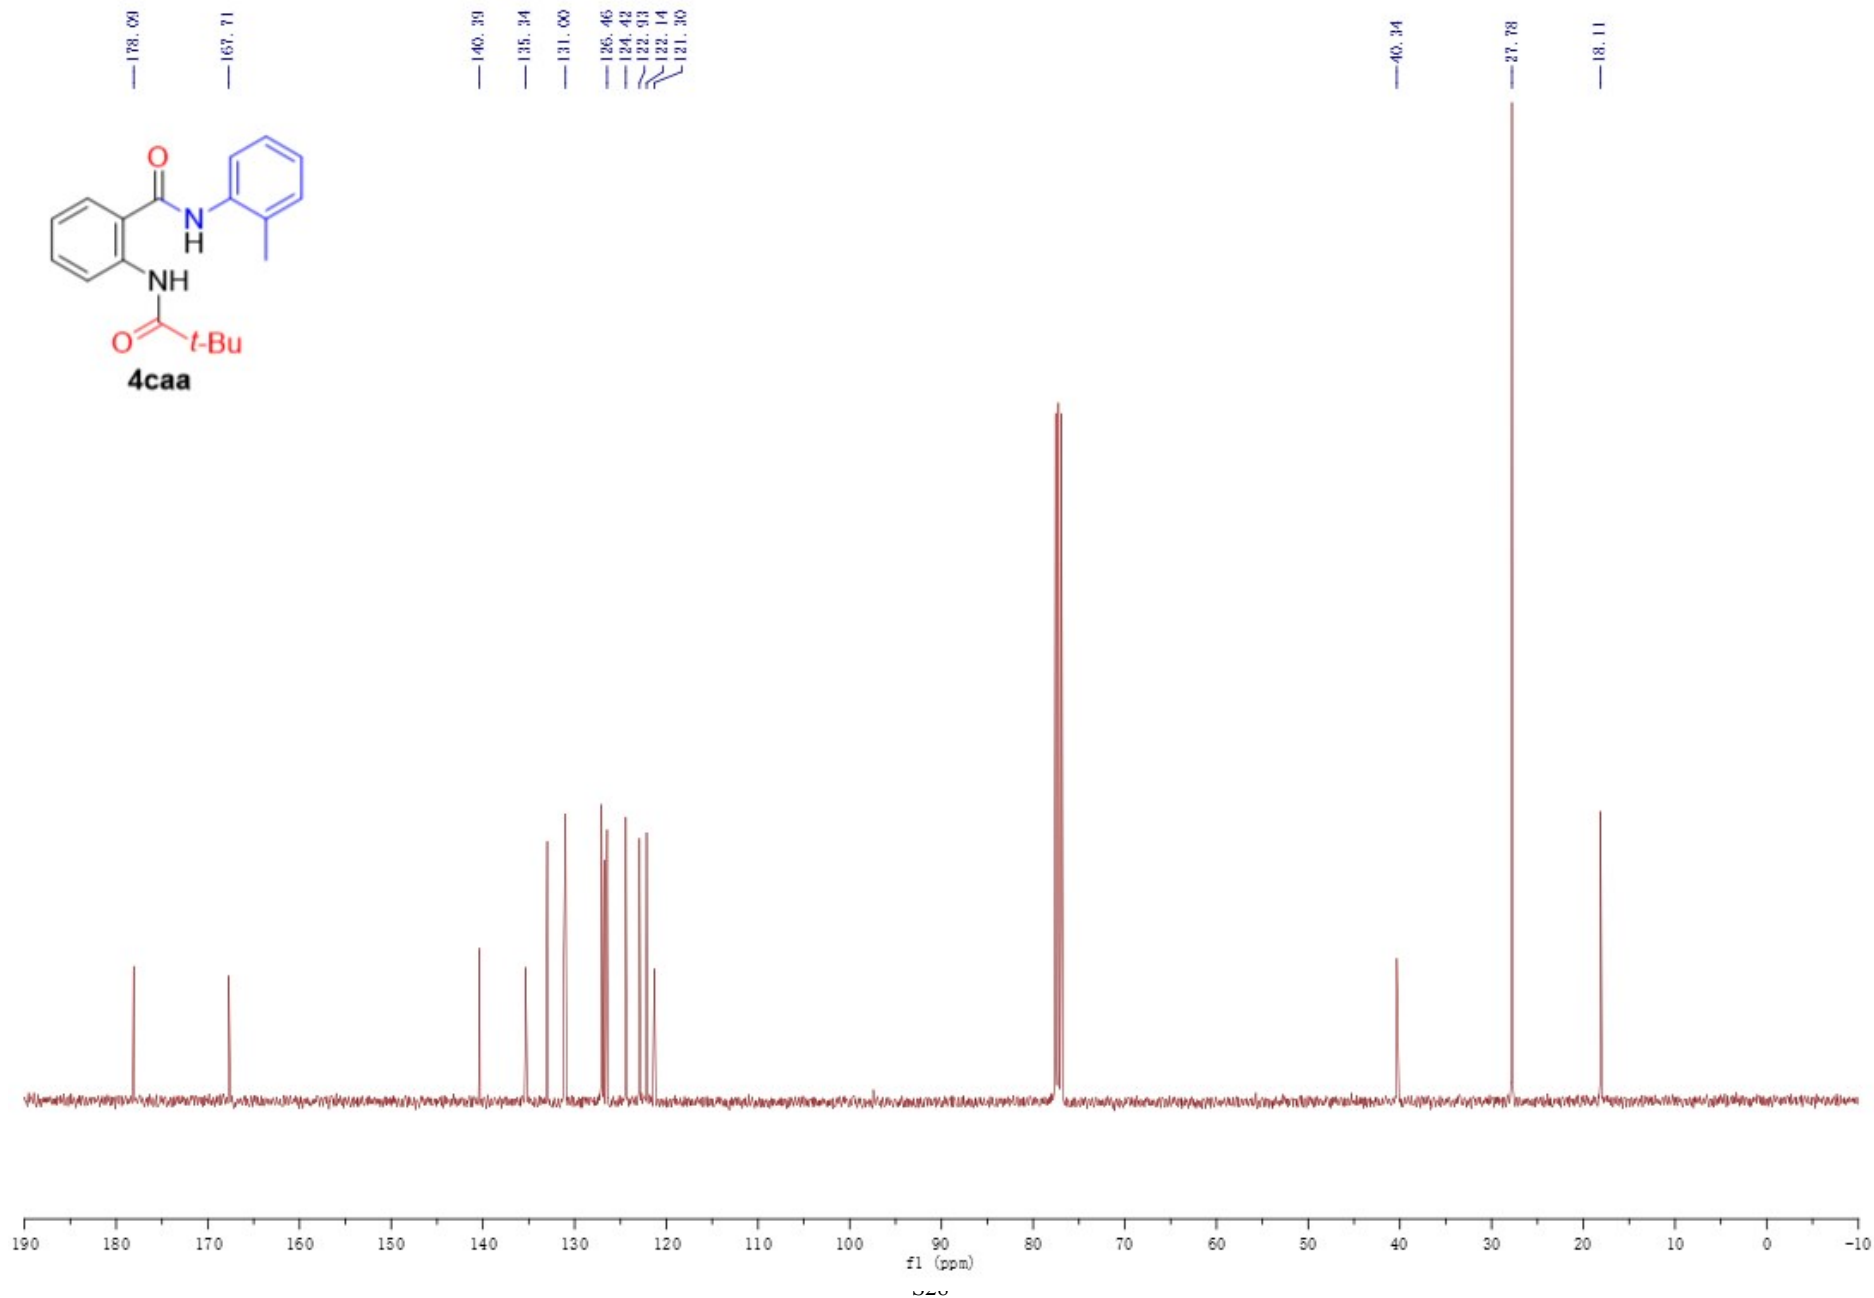

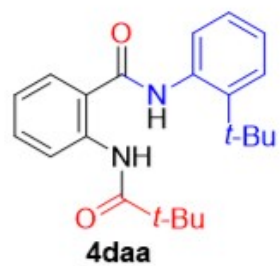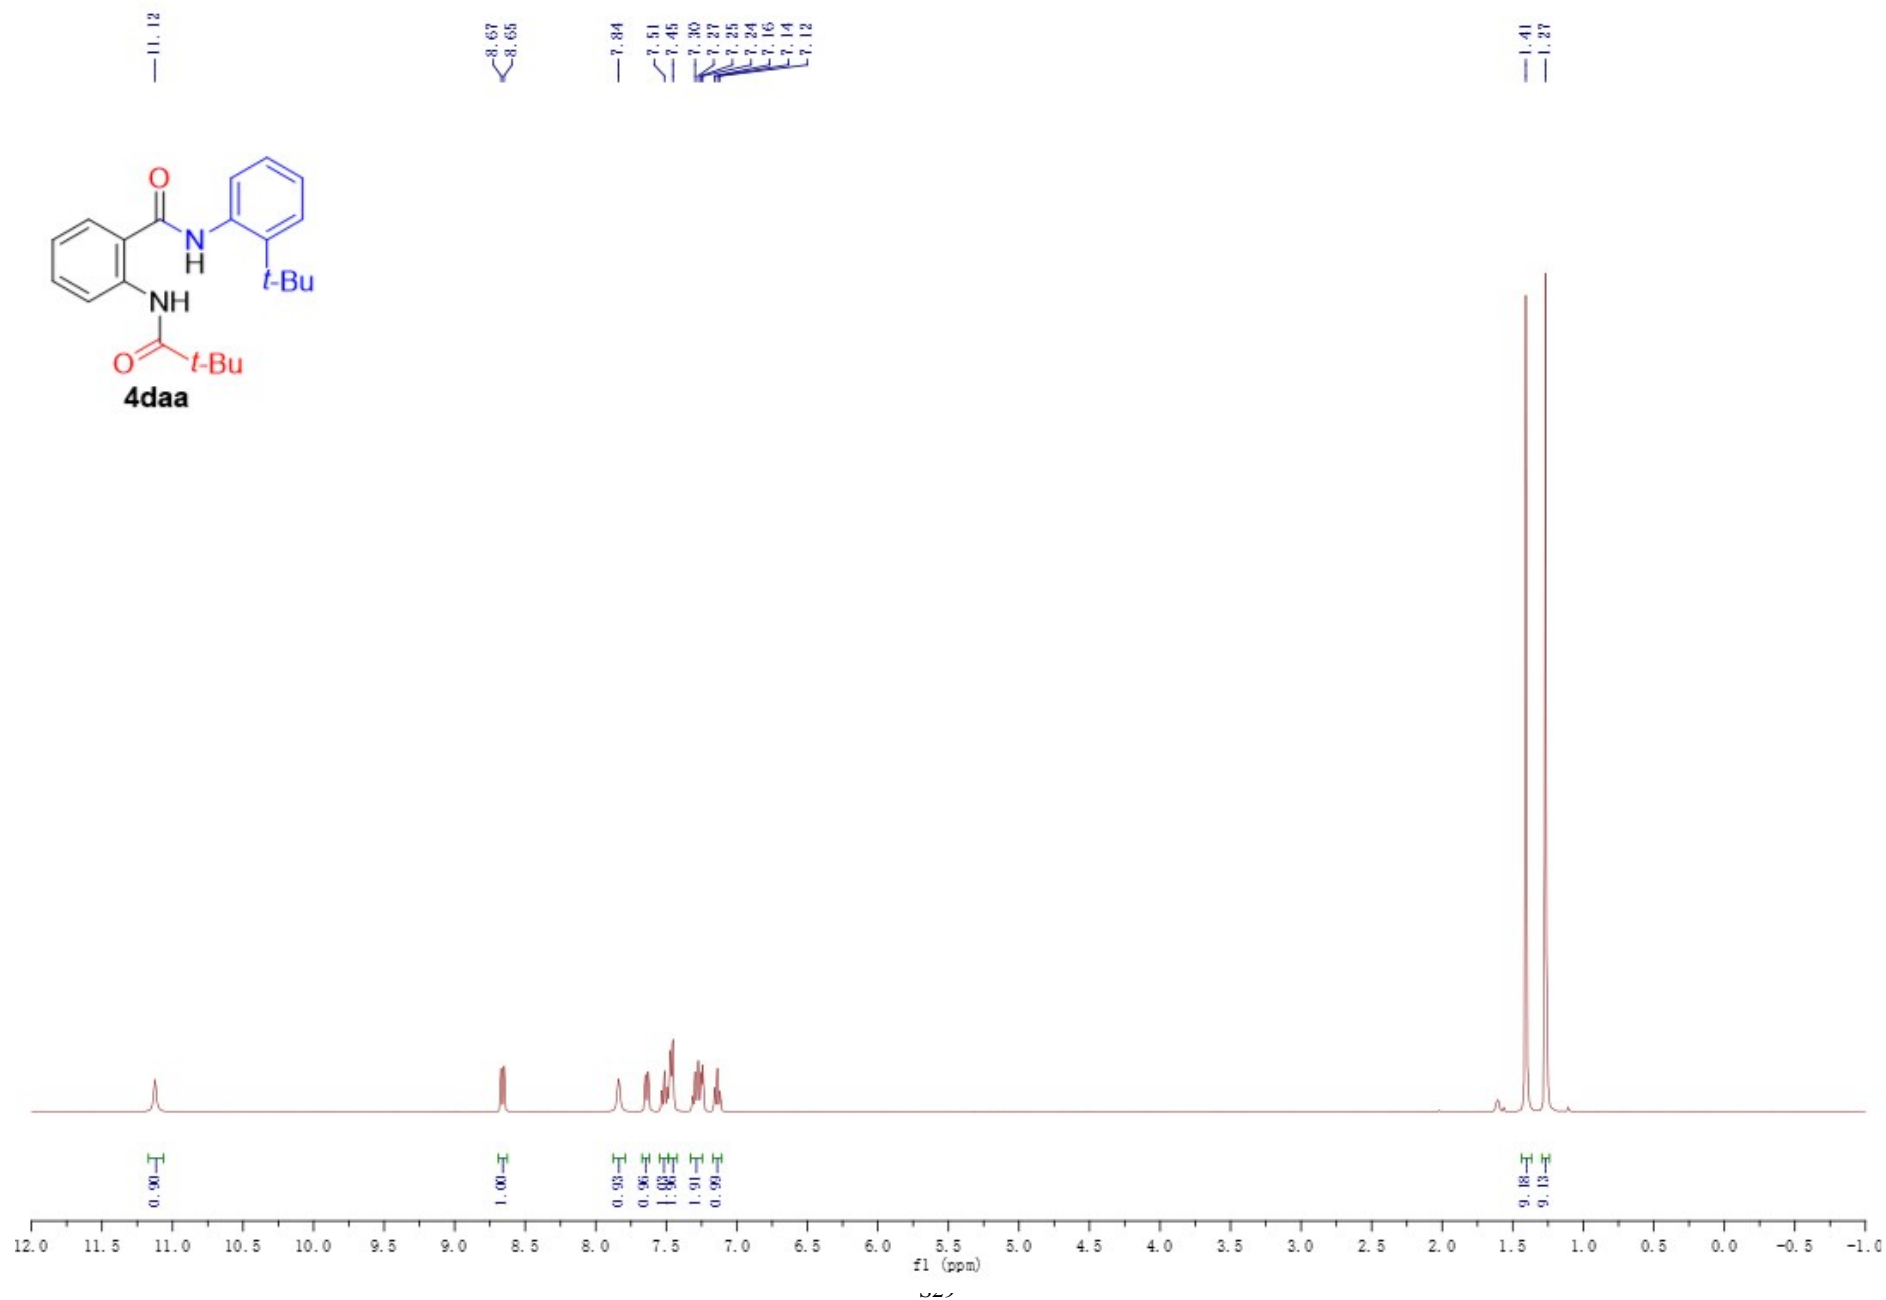

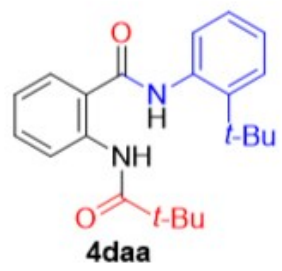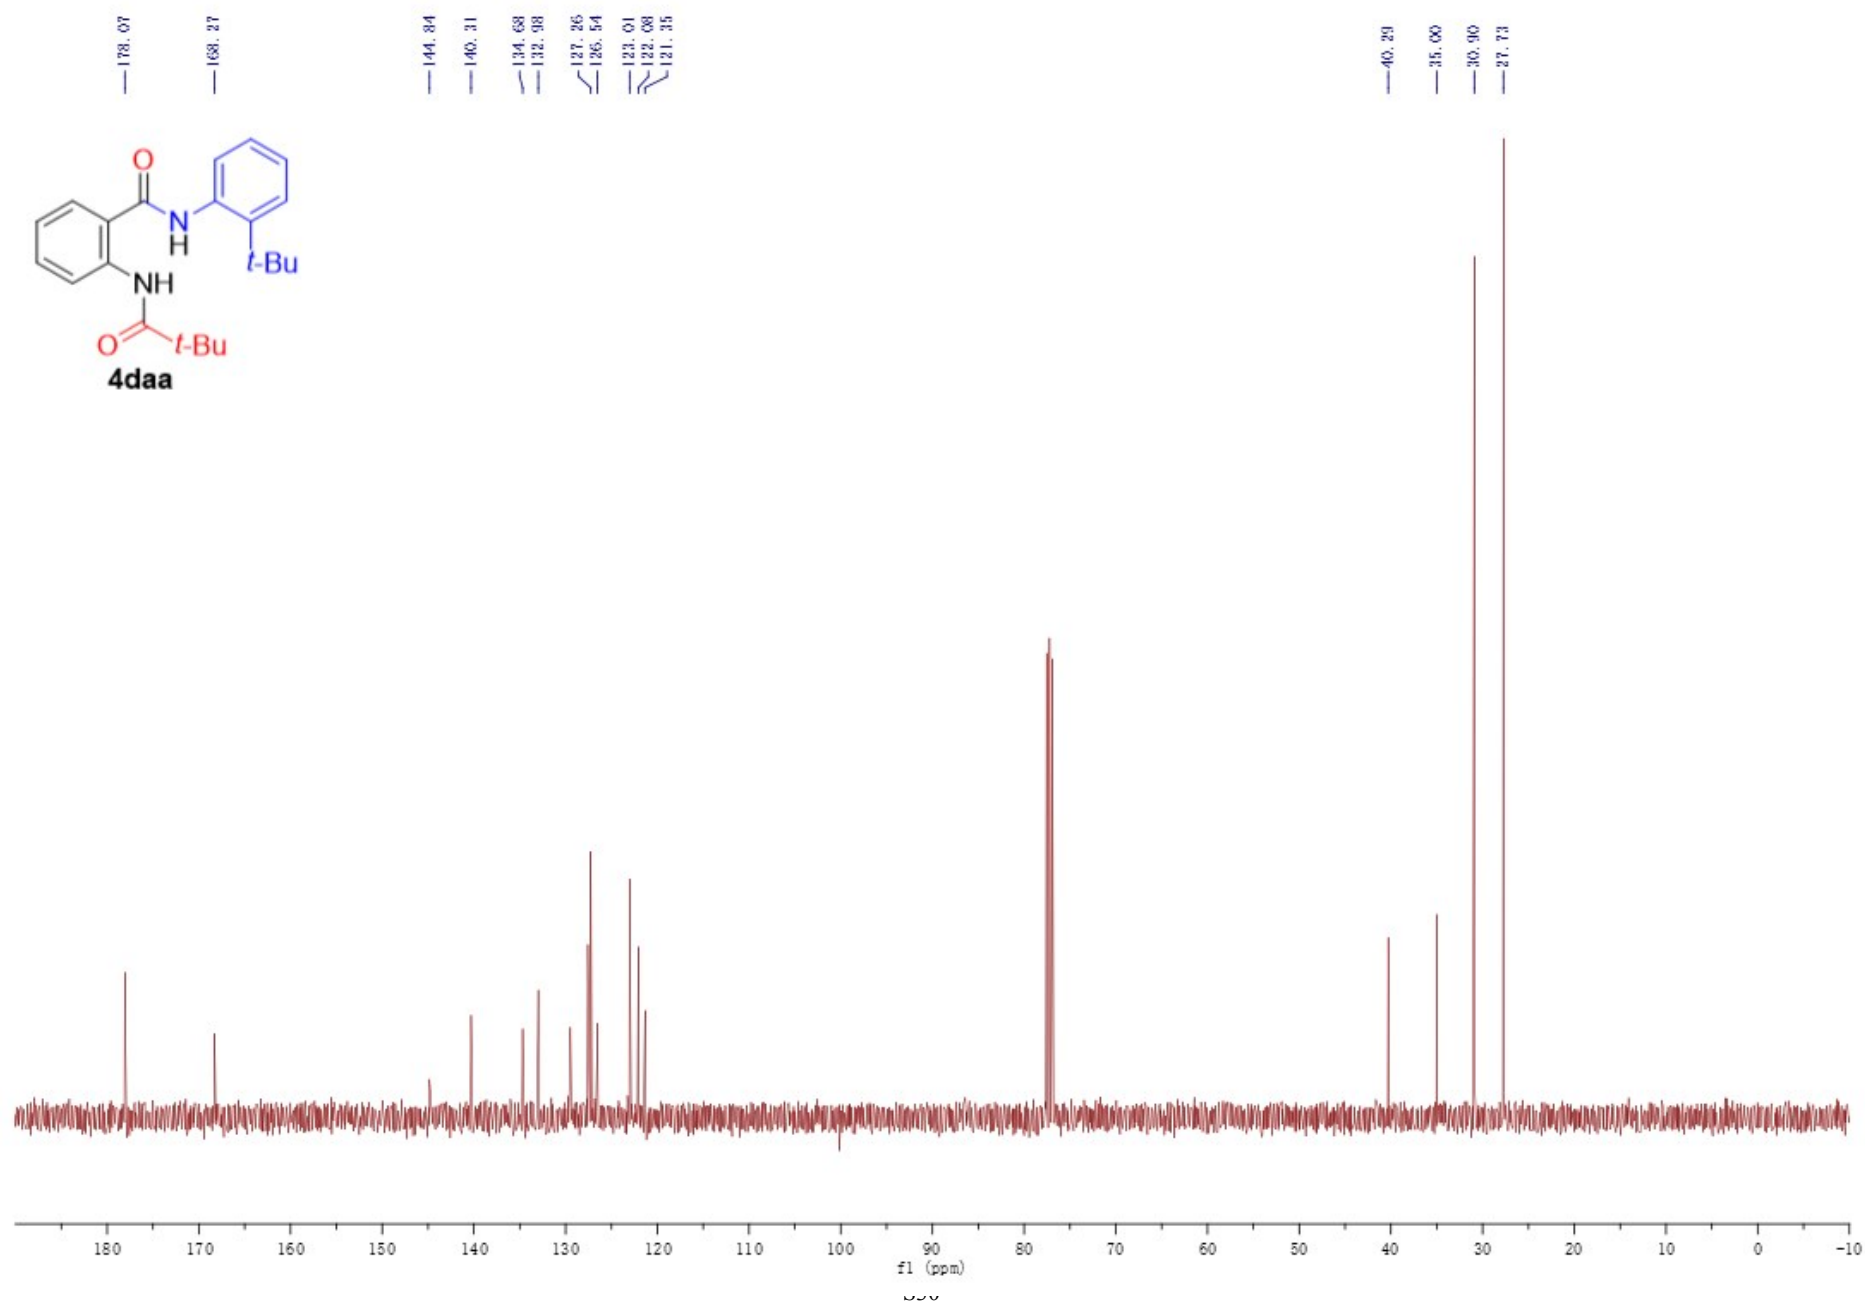

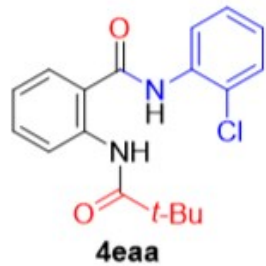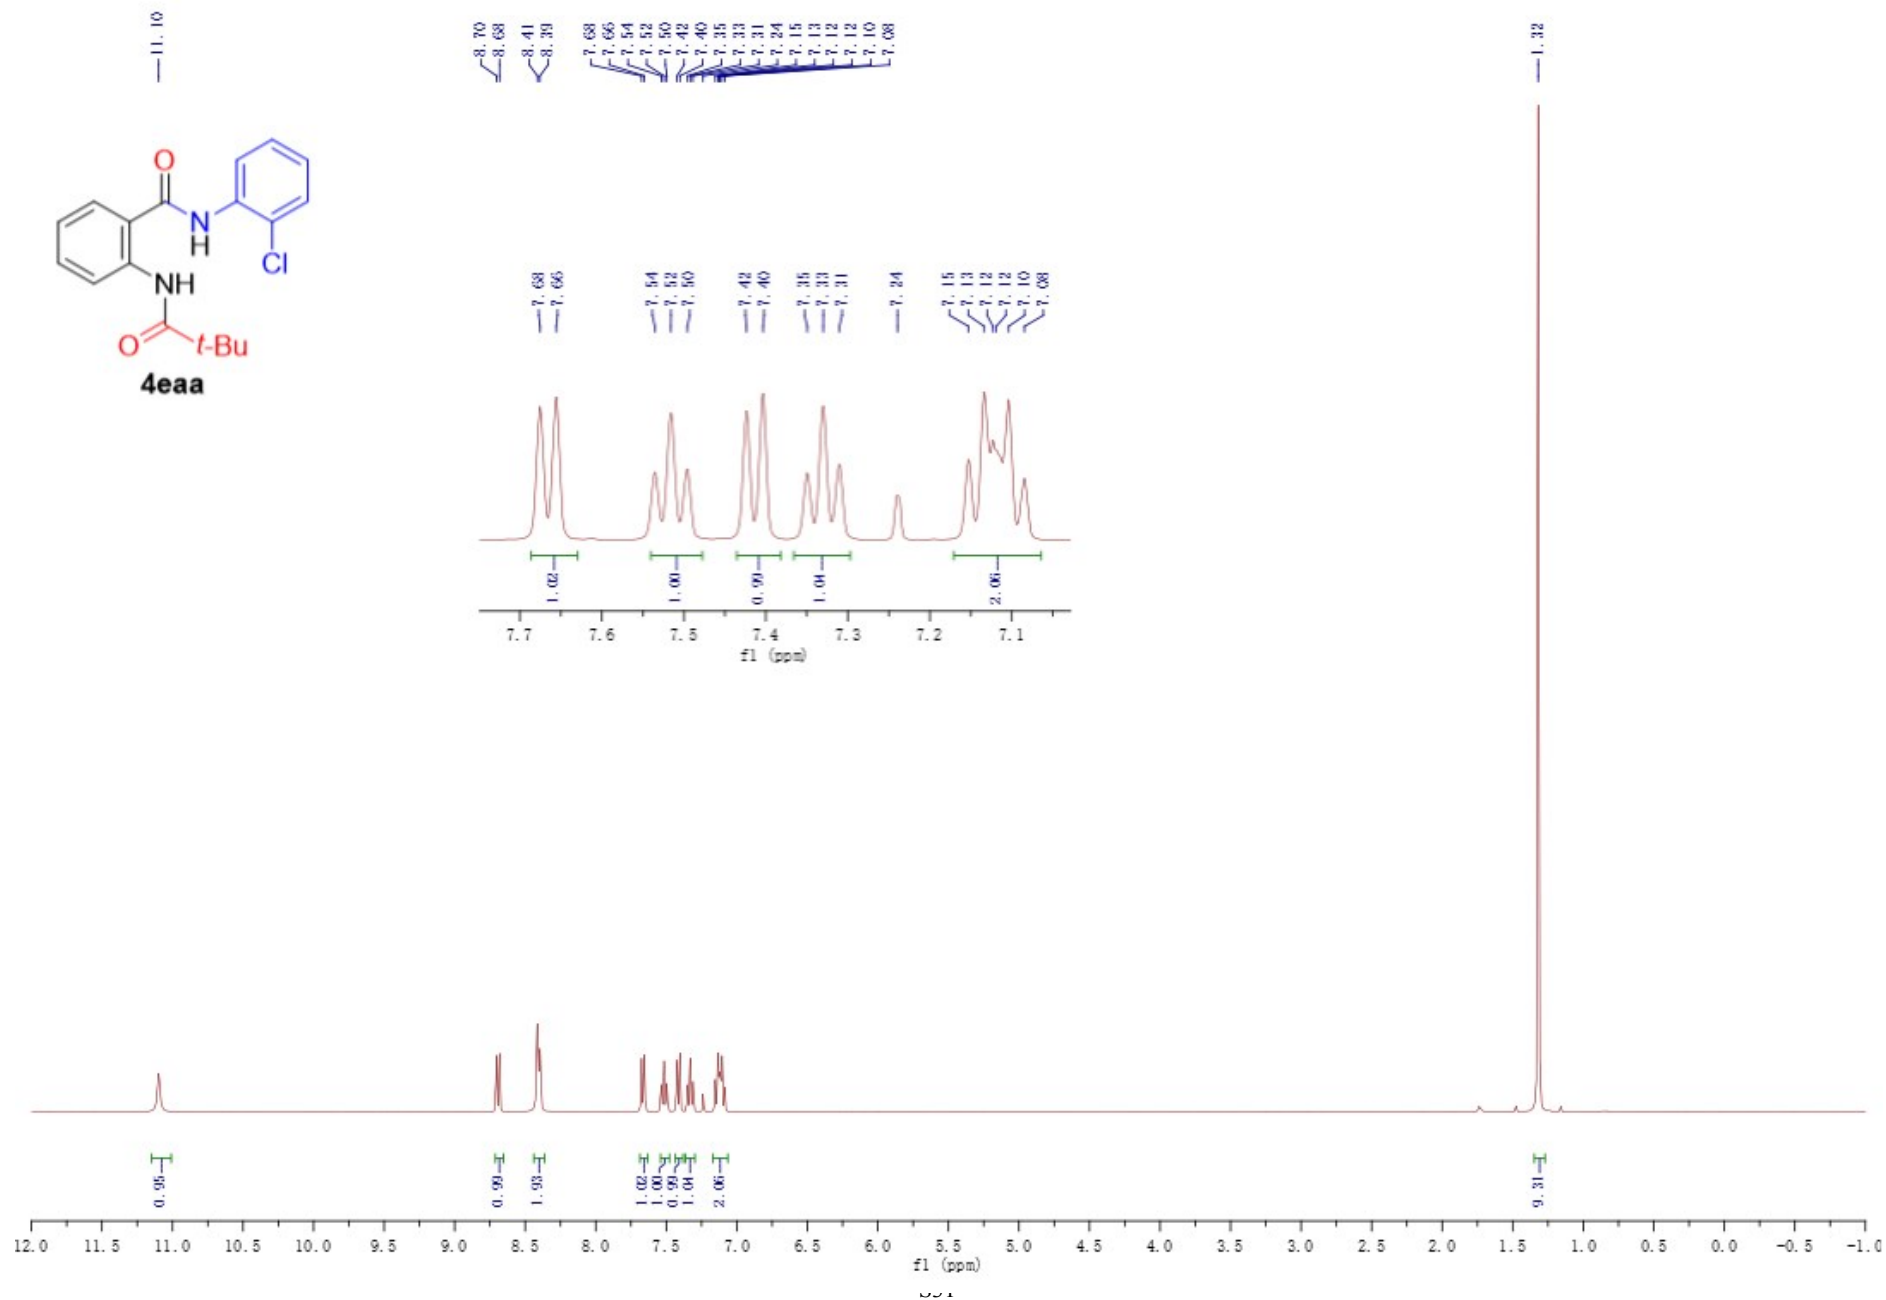

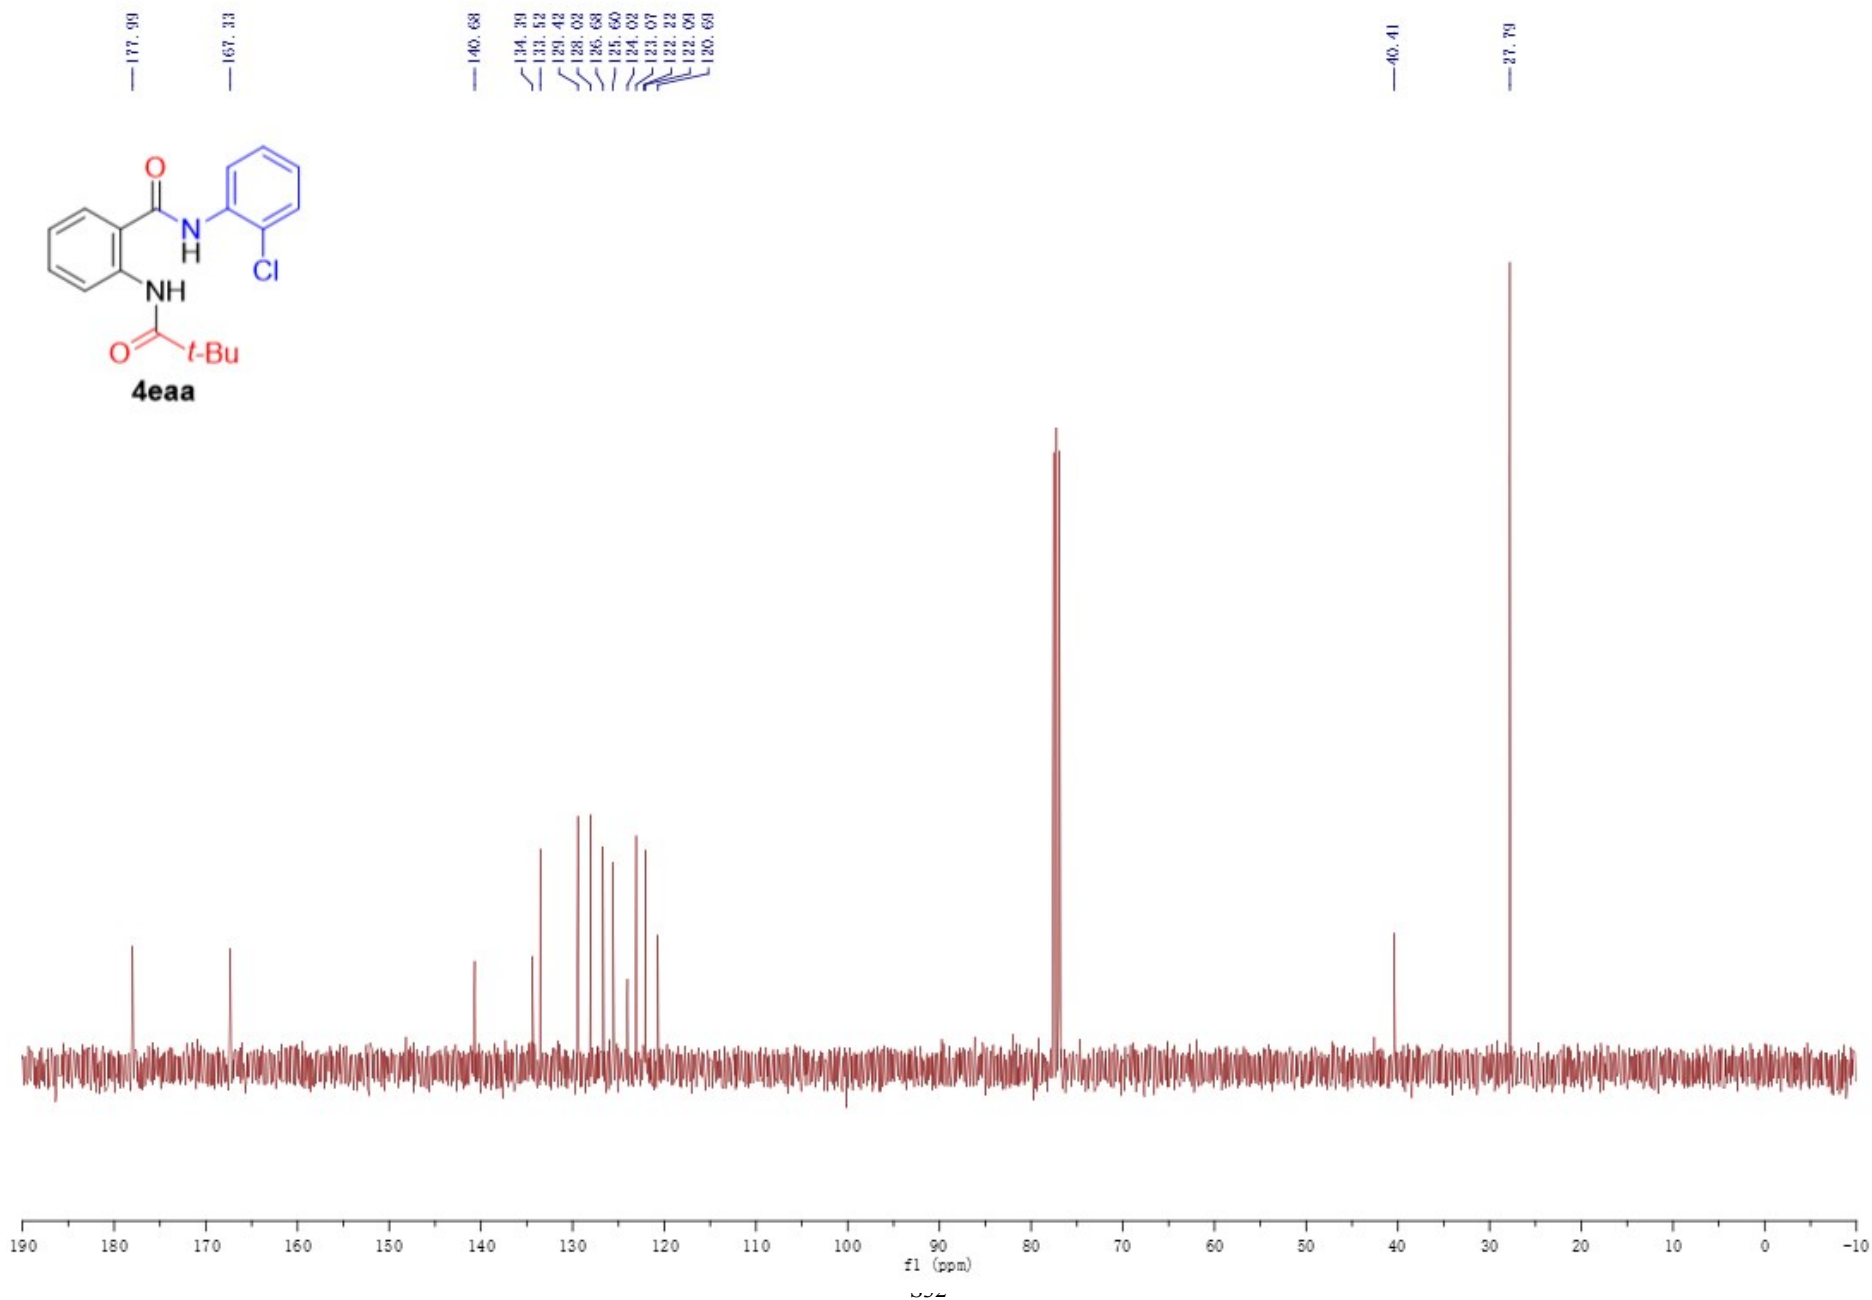



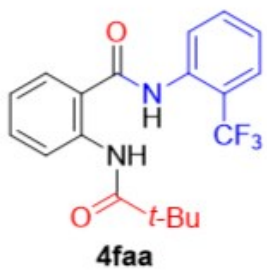

— 11.02

8.71  
 8.68  
 8.23  
 8.21  
 8.16  
 7.60  
 7.62  
 7.55  
 7.51  
 7.33  
 7.31  
 7.29  
 7.24  
 7.16  
 7.16  
 7.14  
 7.12

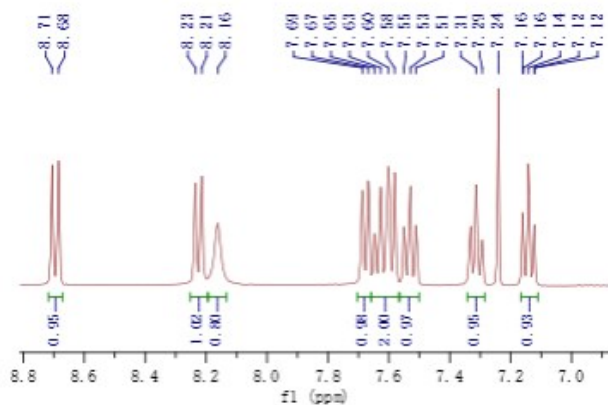

— 1.55  
— 1.32

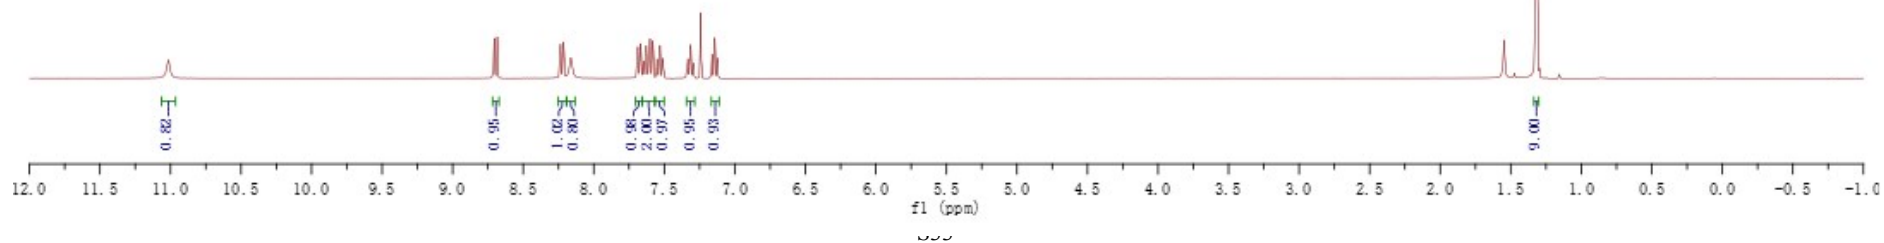

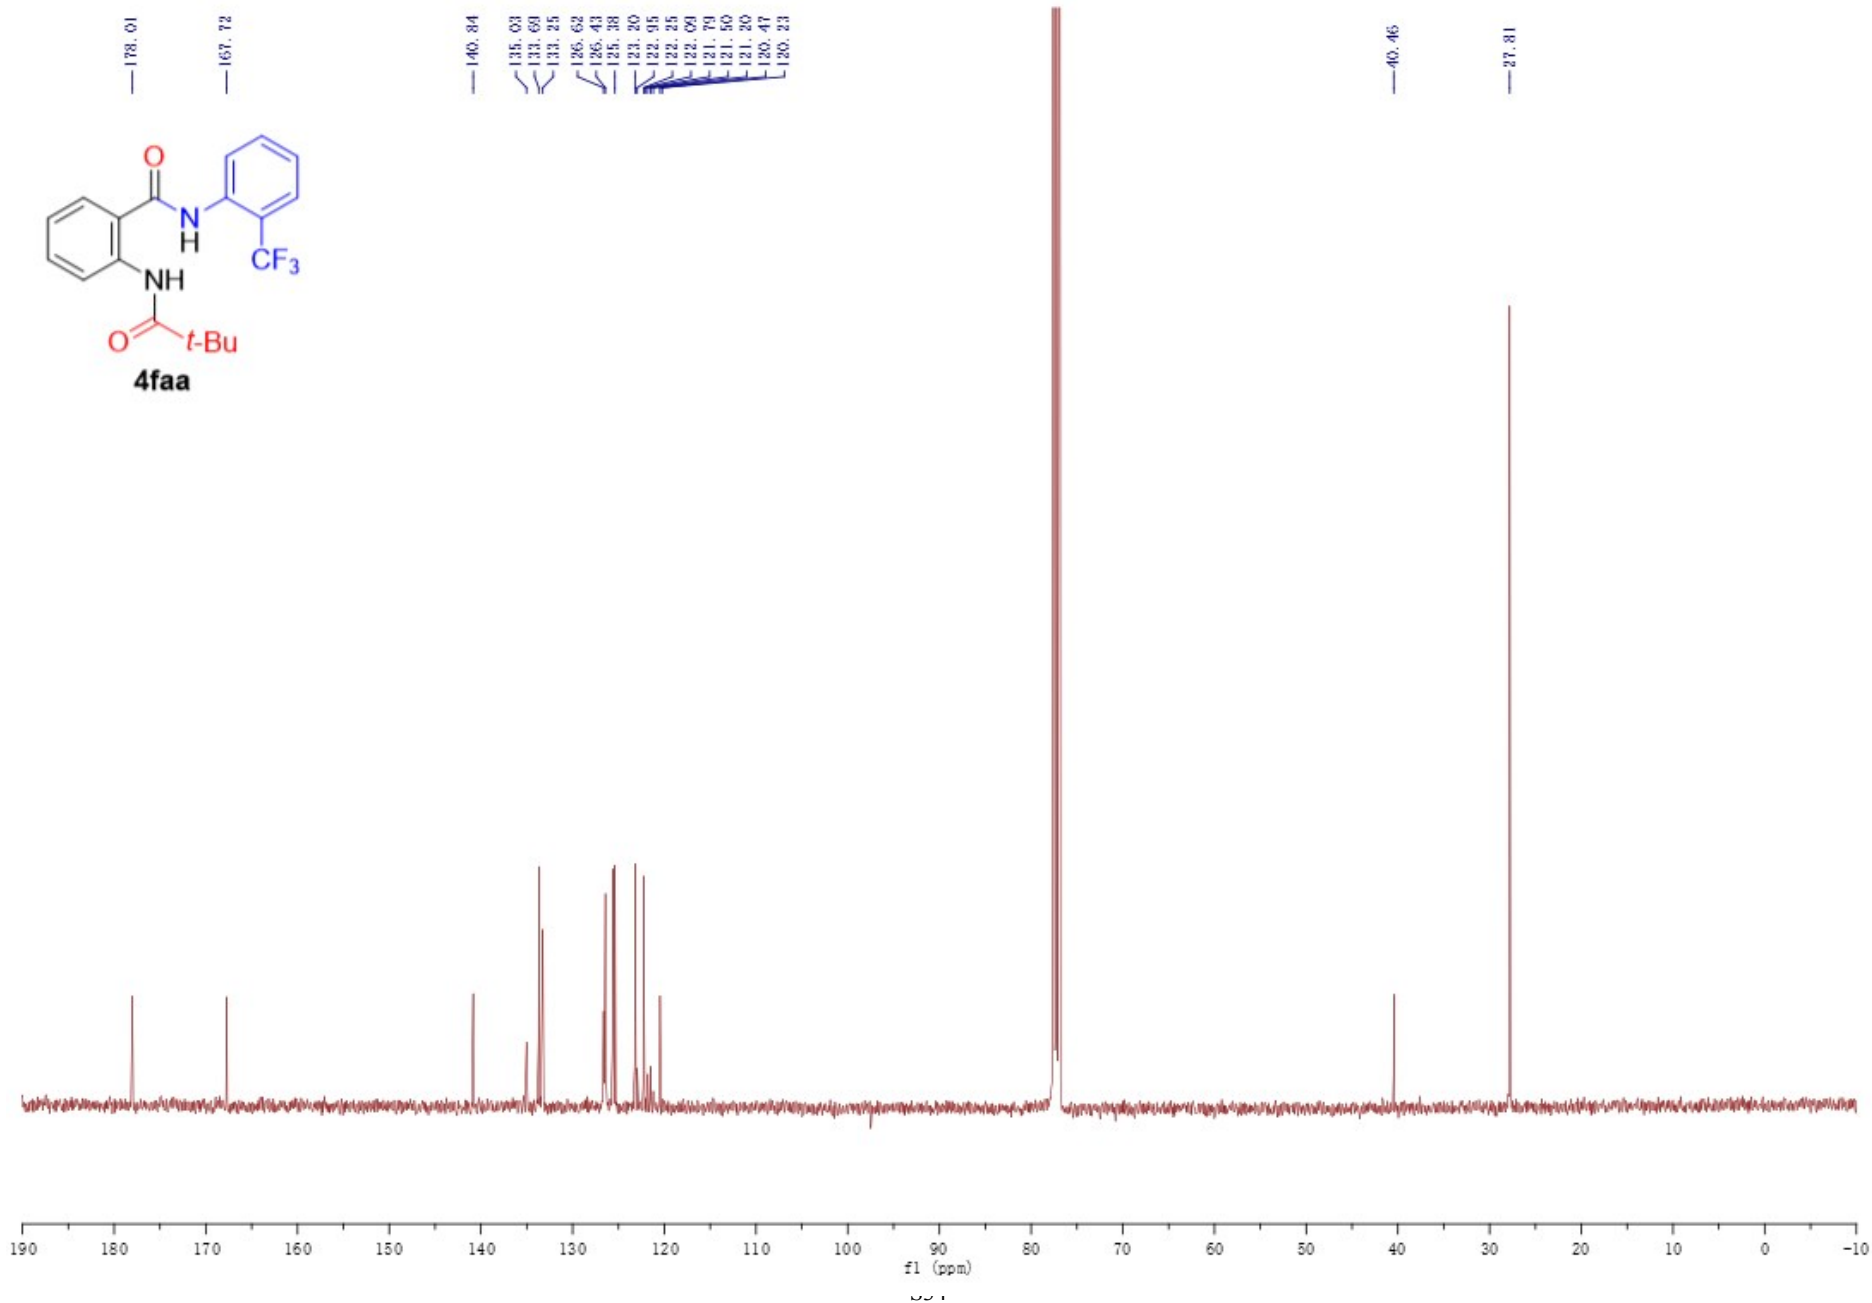

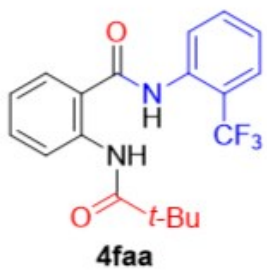

— 60.45

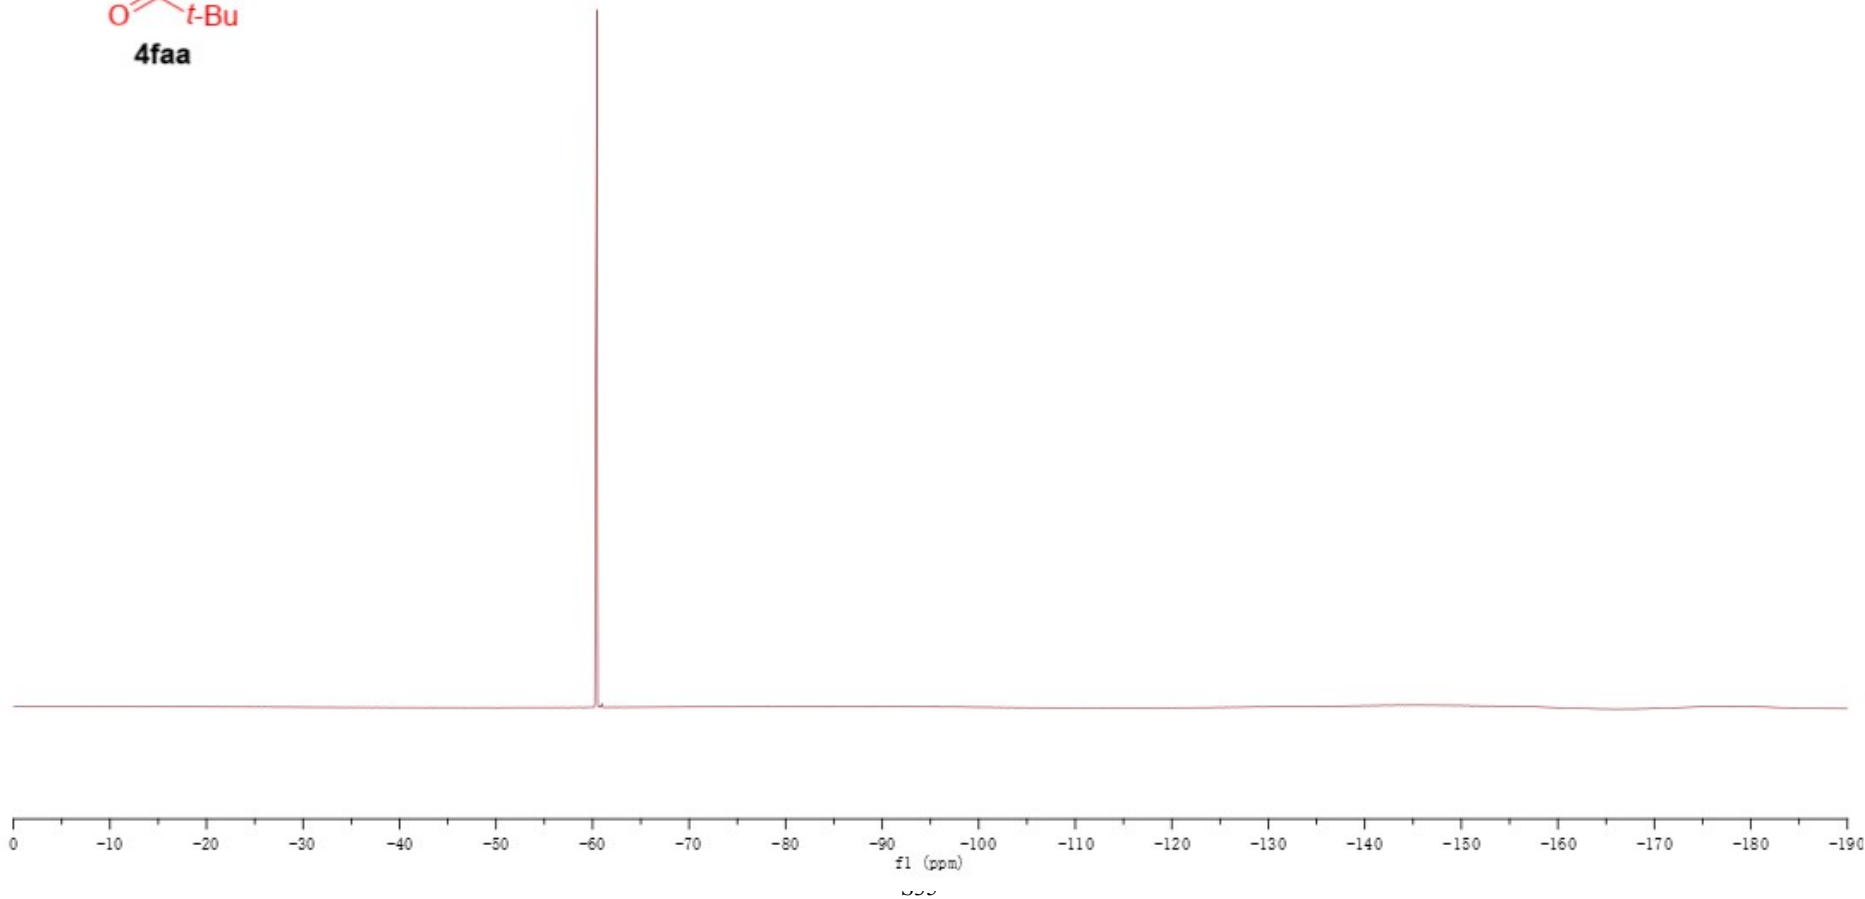

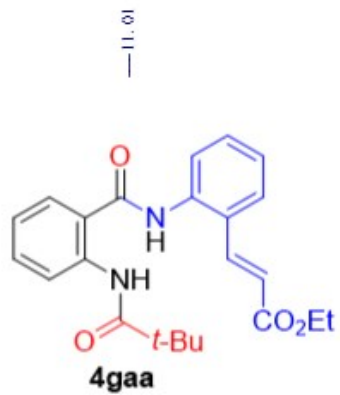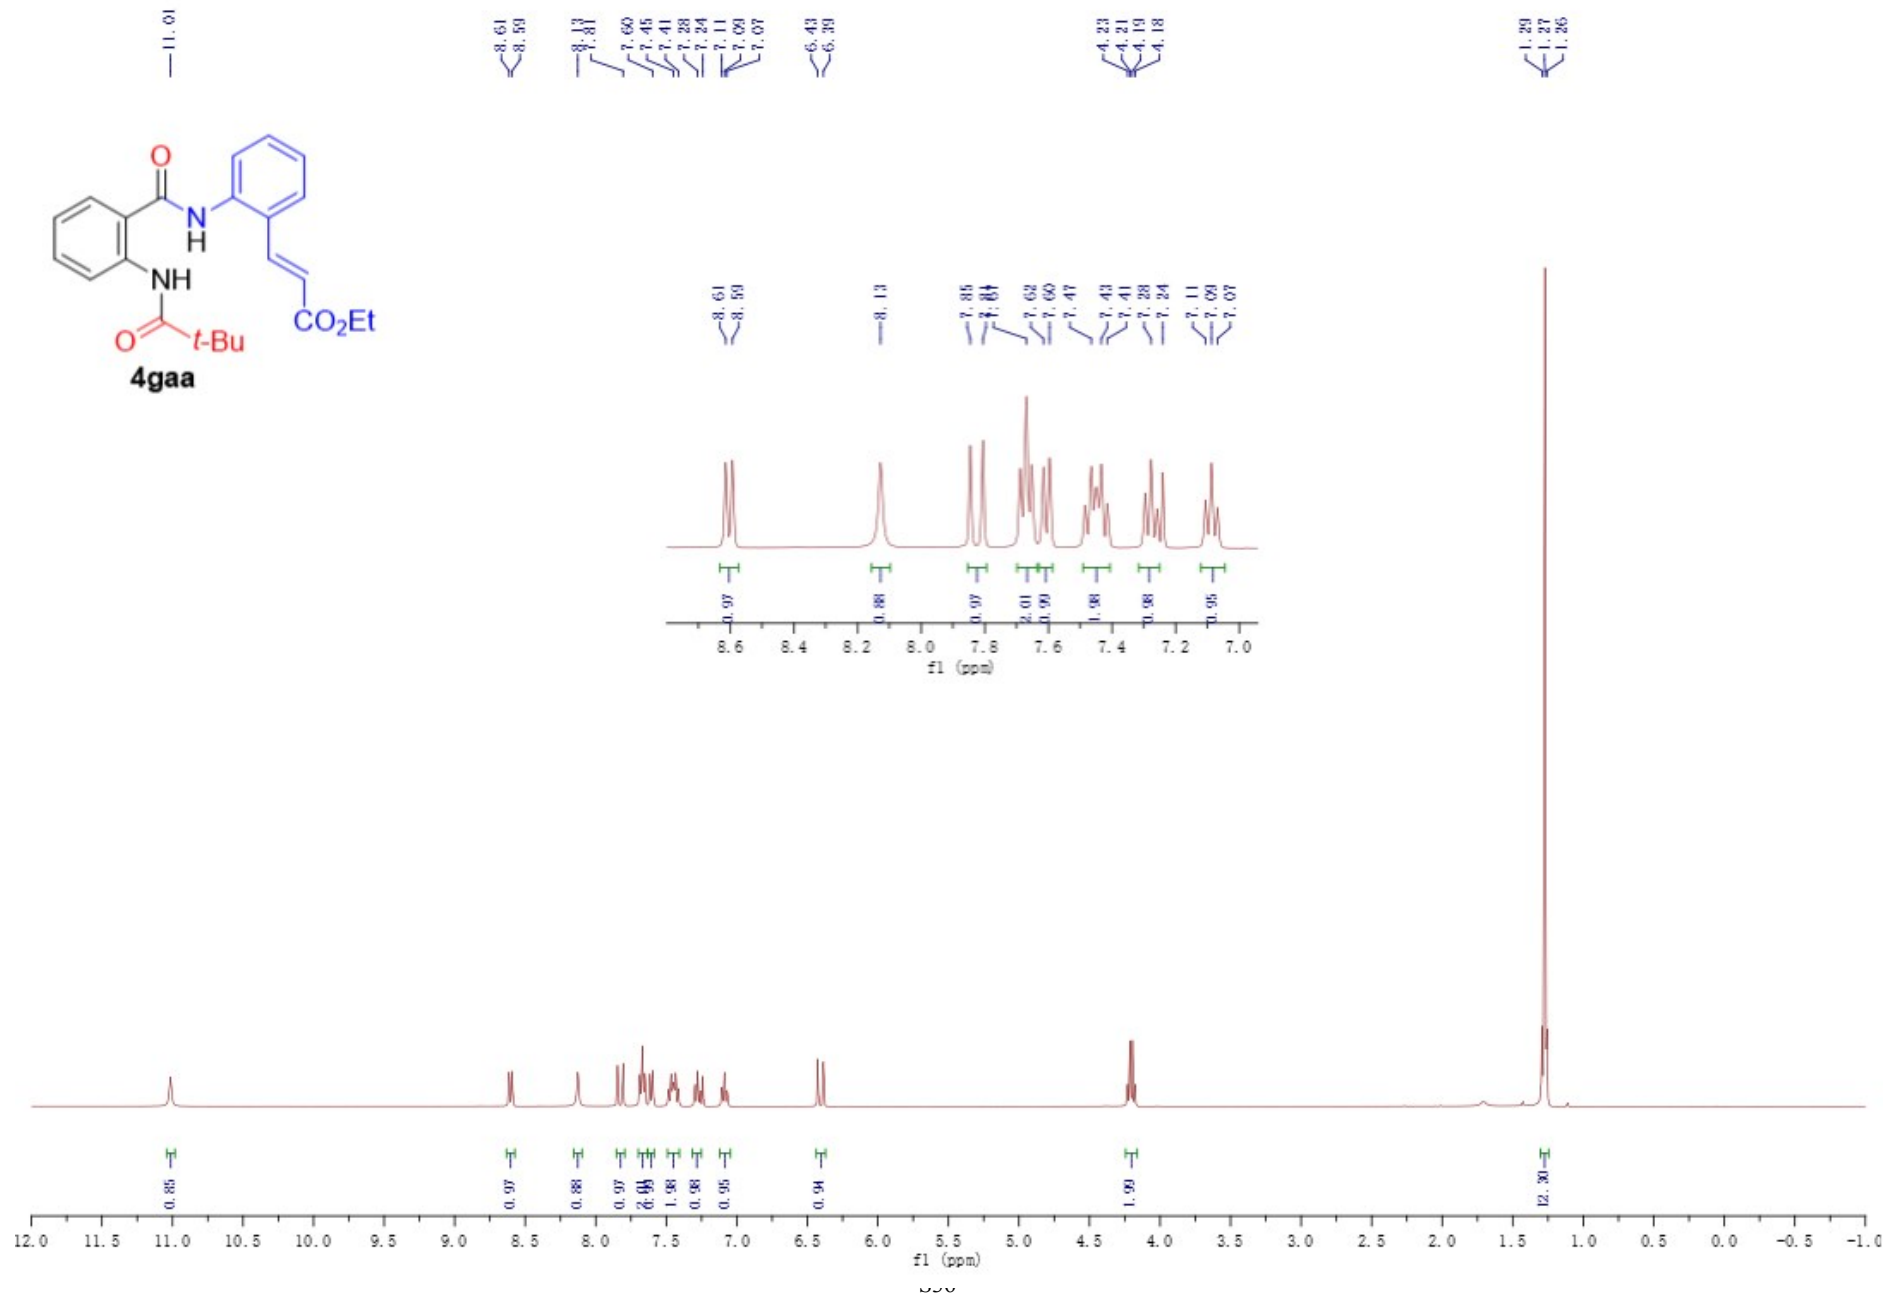

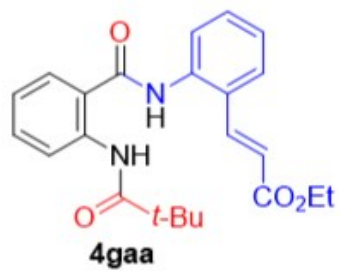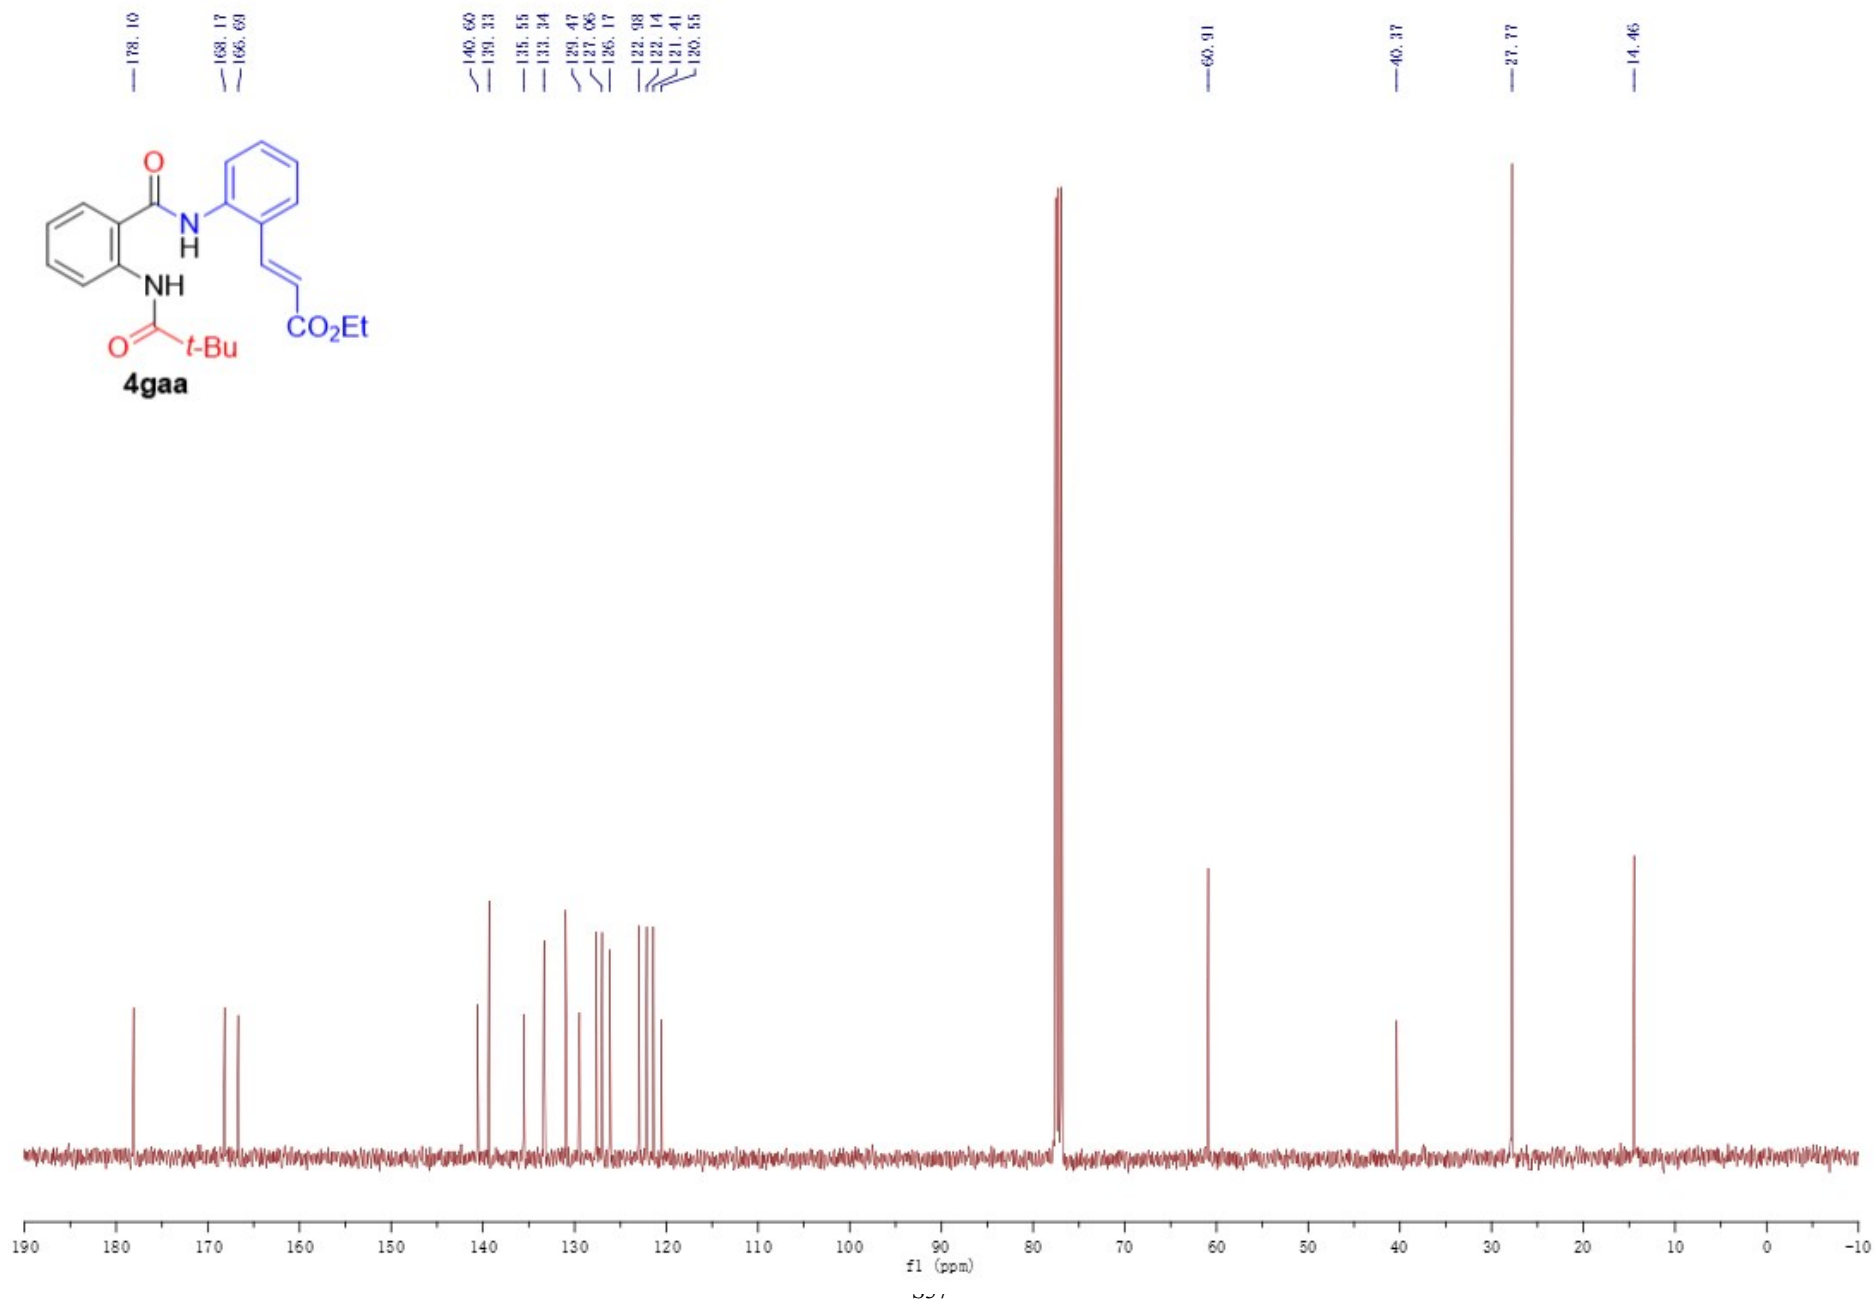

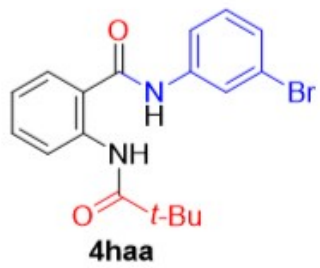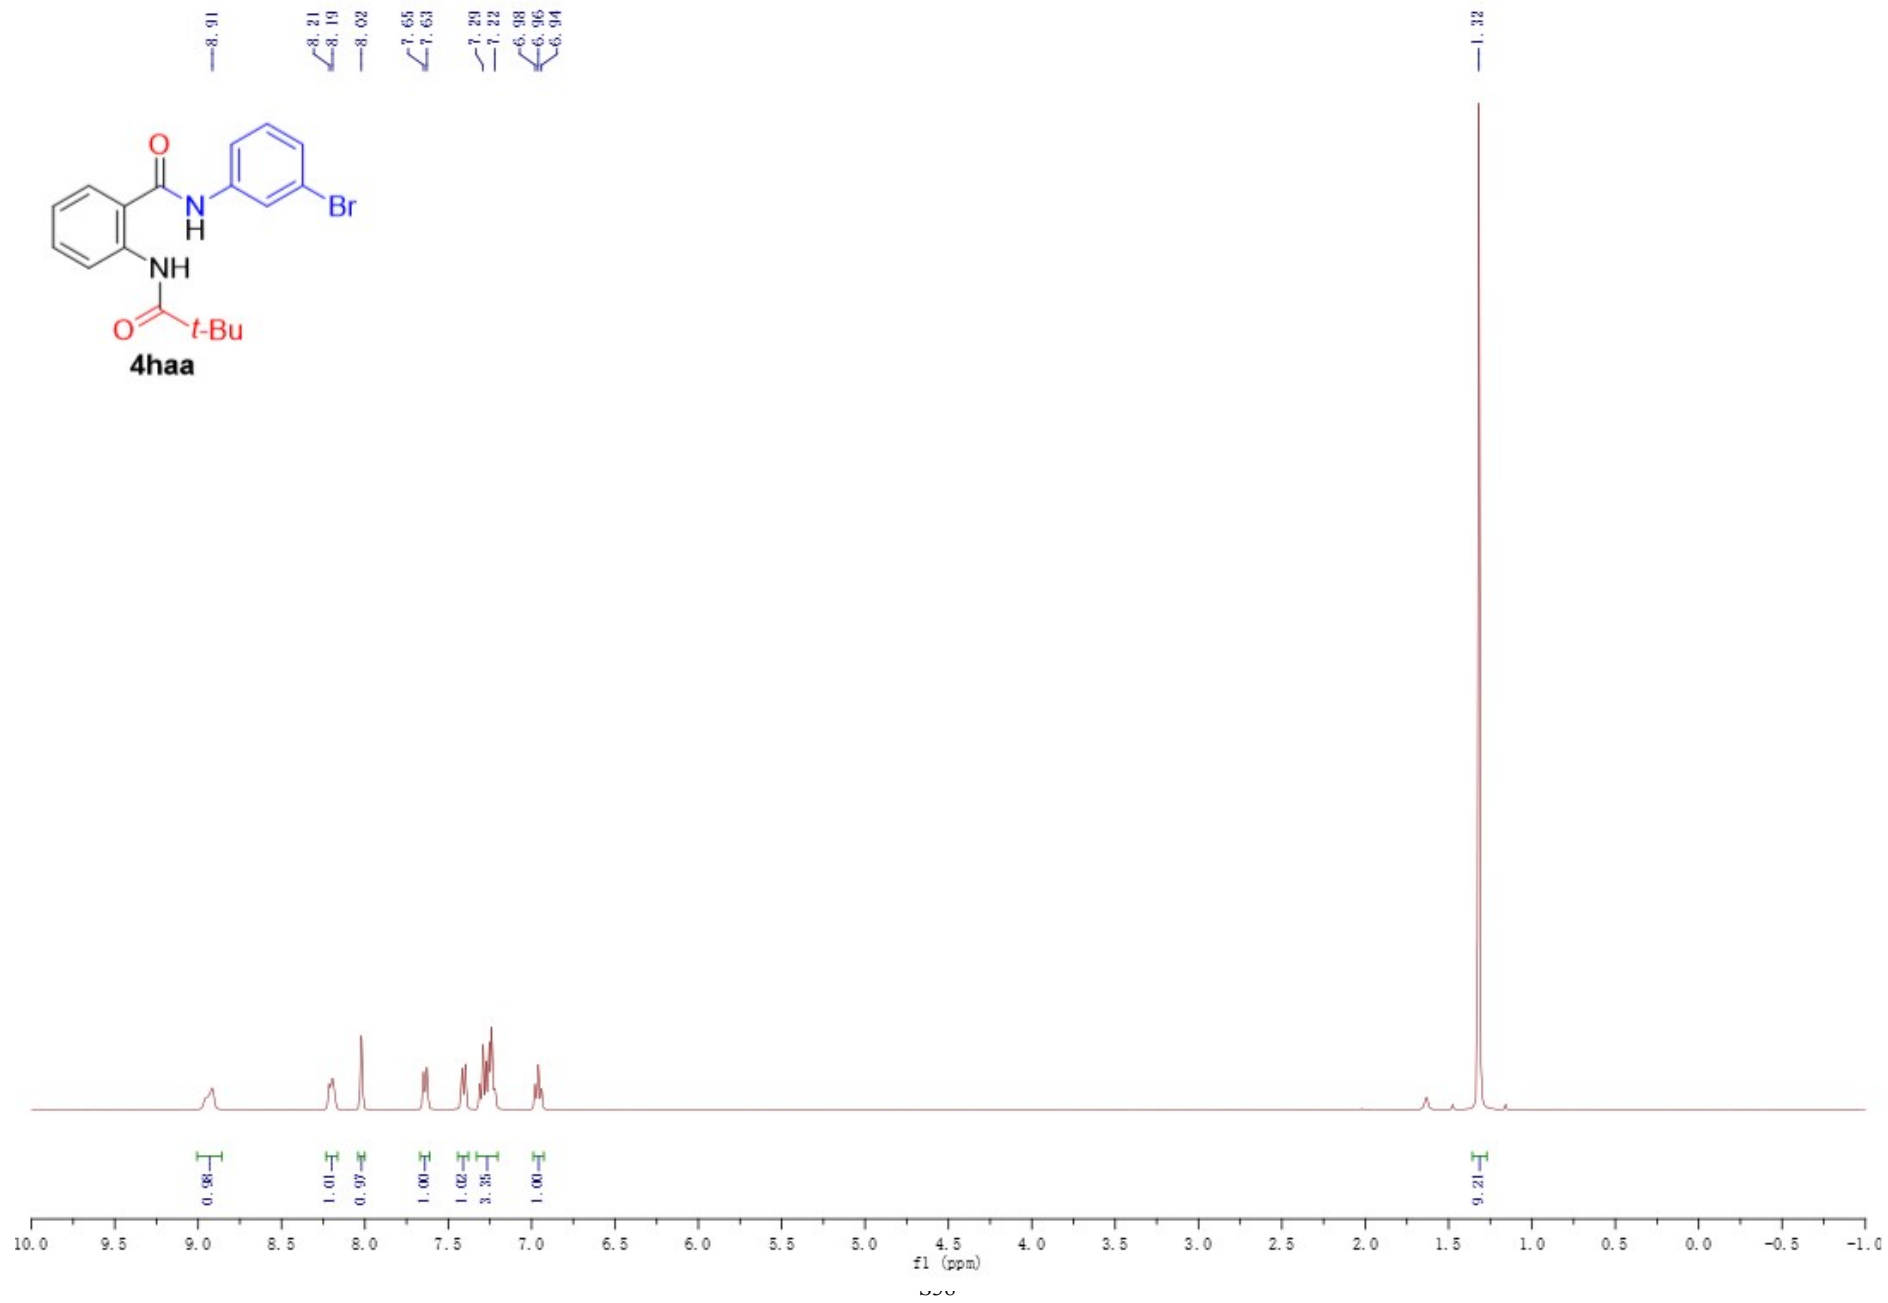

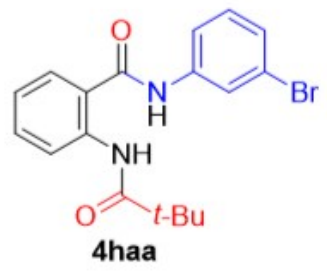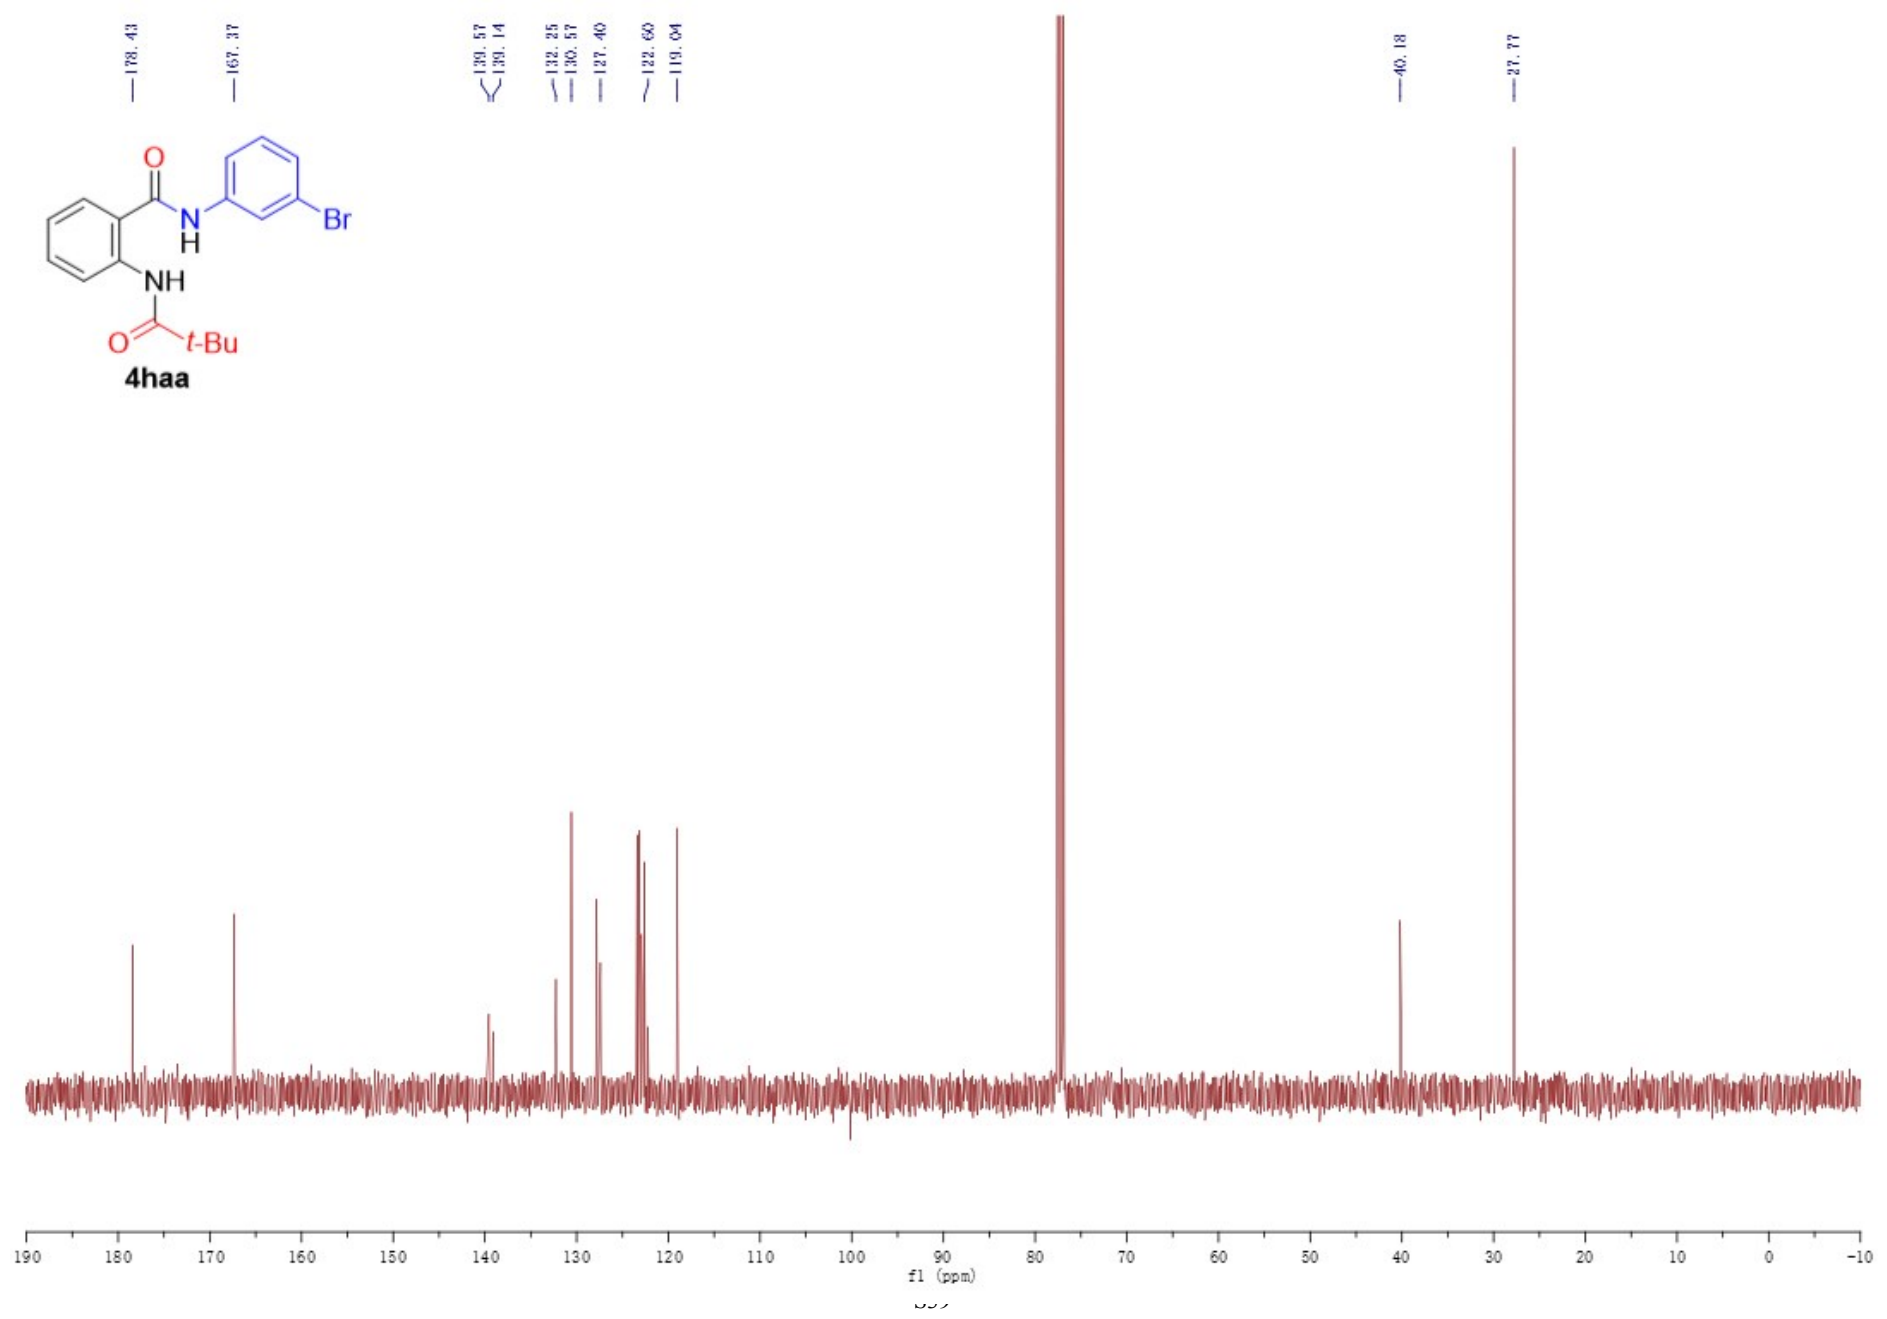

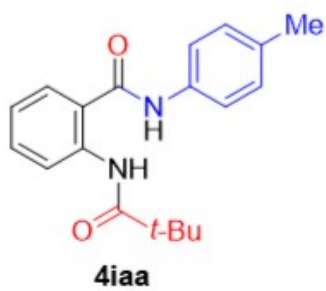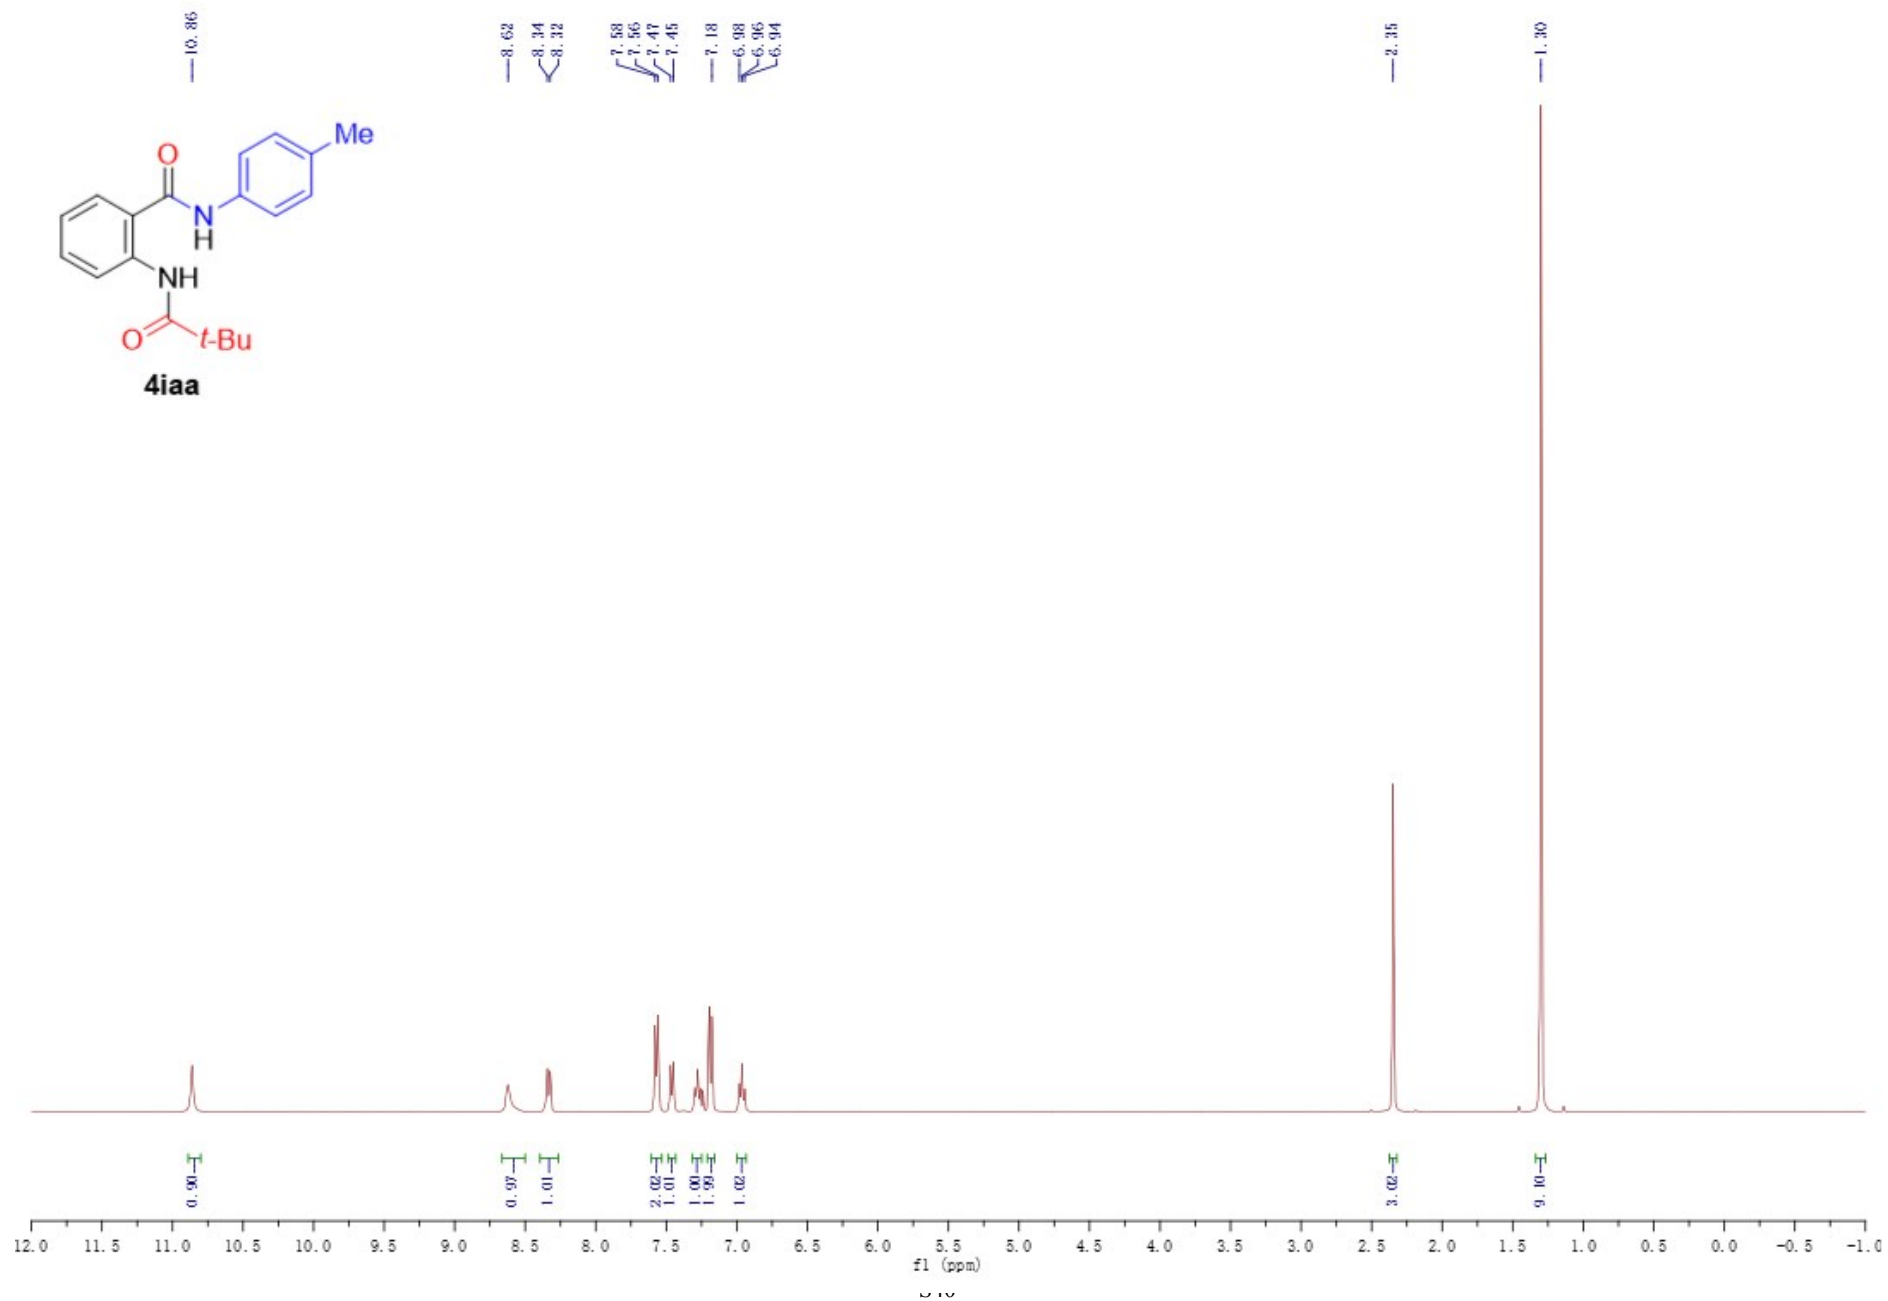



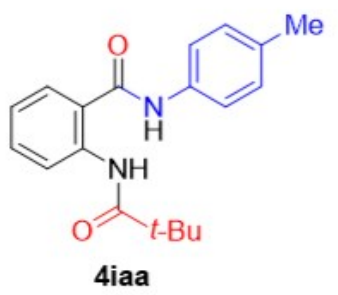

178.18  
167.36  
139.33  
134.66  
132.14  
129.79  
127.20  
122.96  
122.26  
122.23  
120.86

40.18  
27.76  
21.17

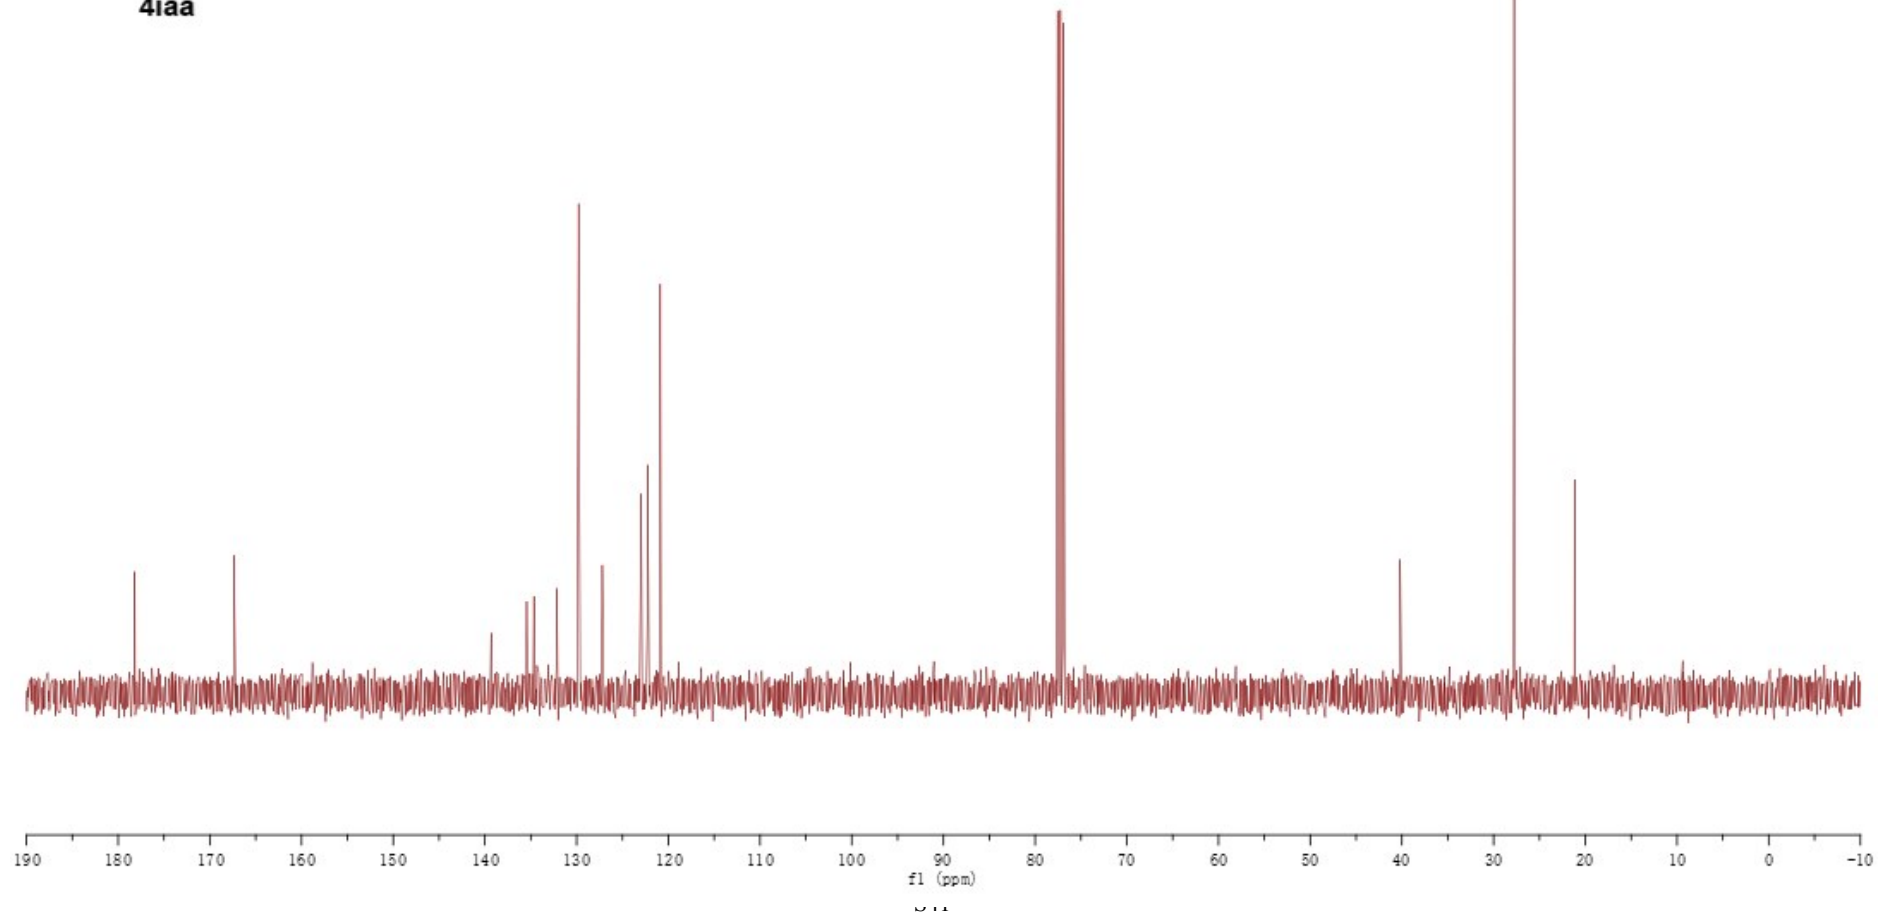

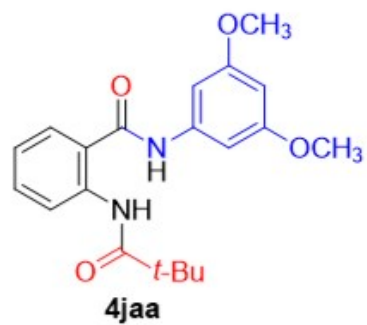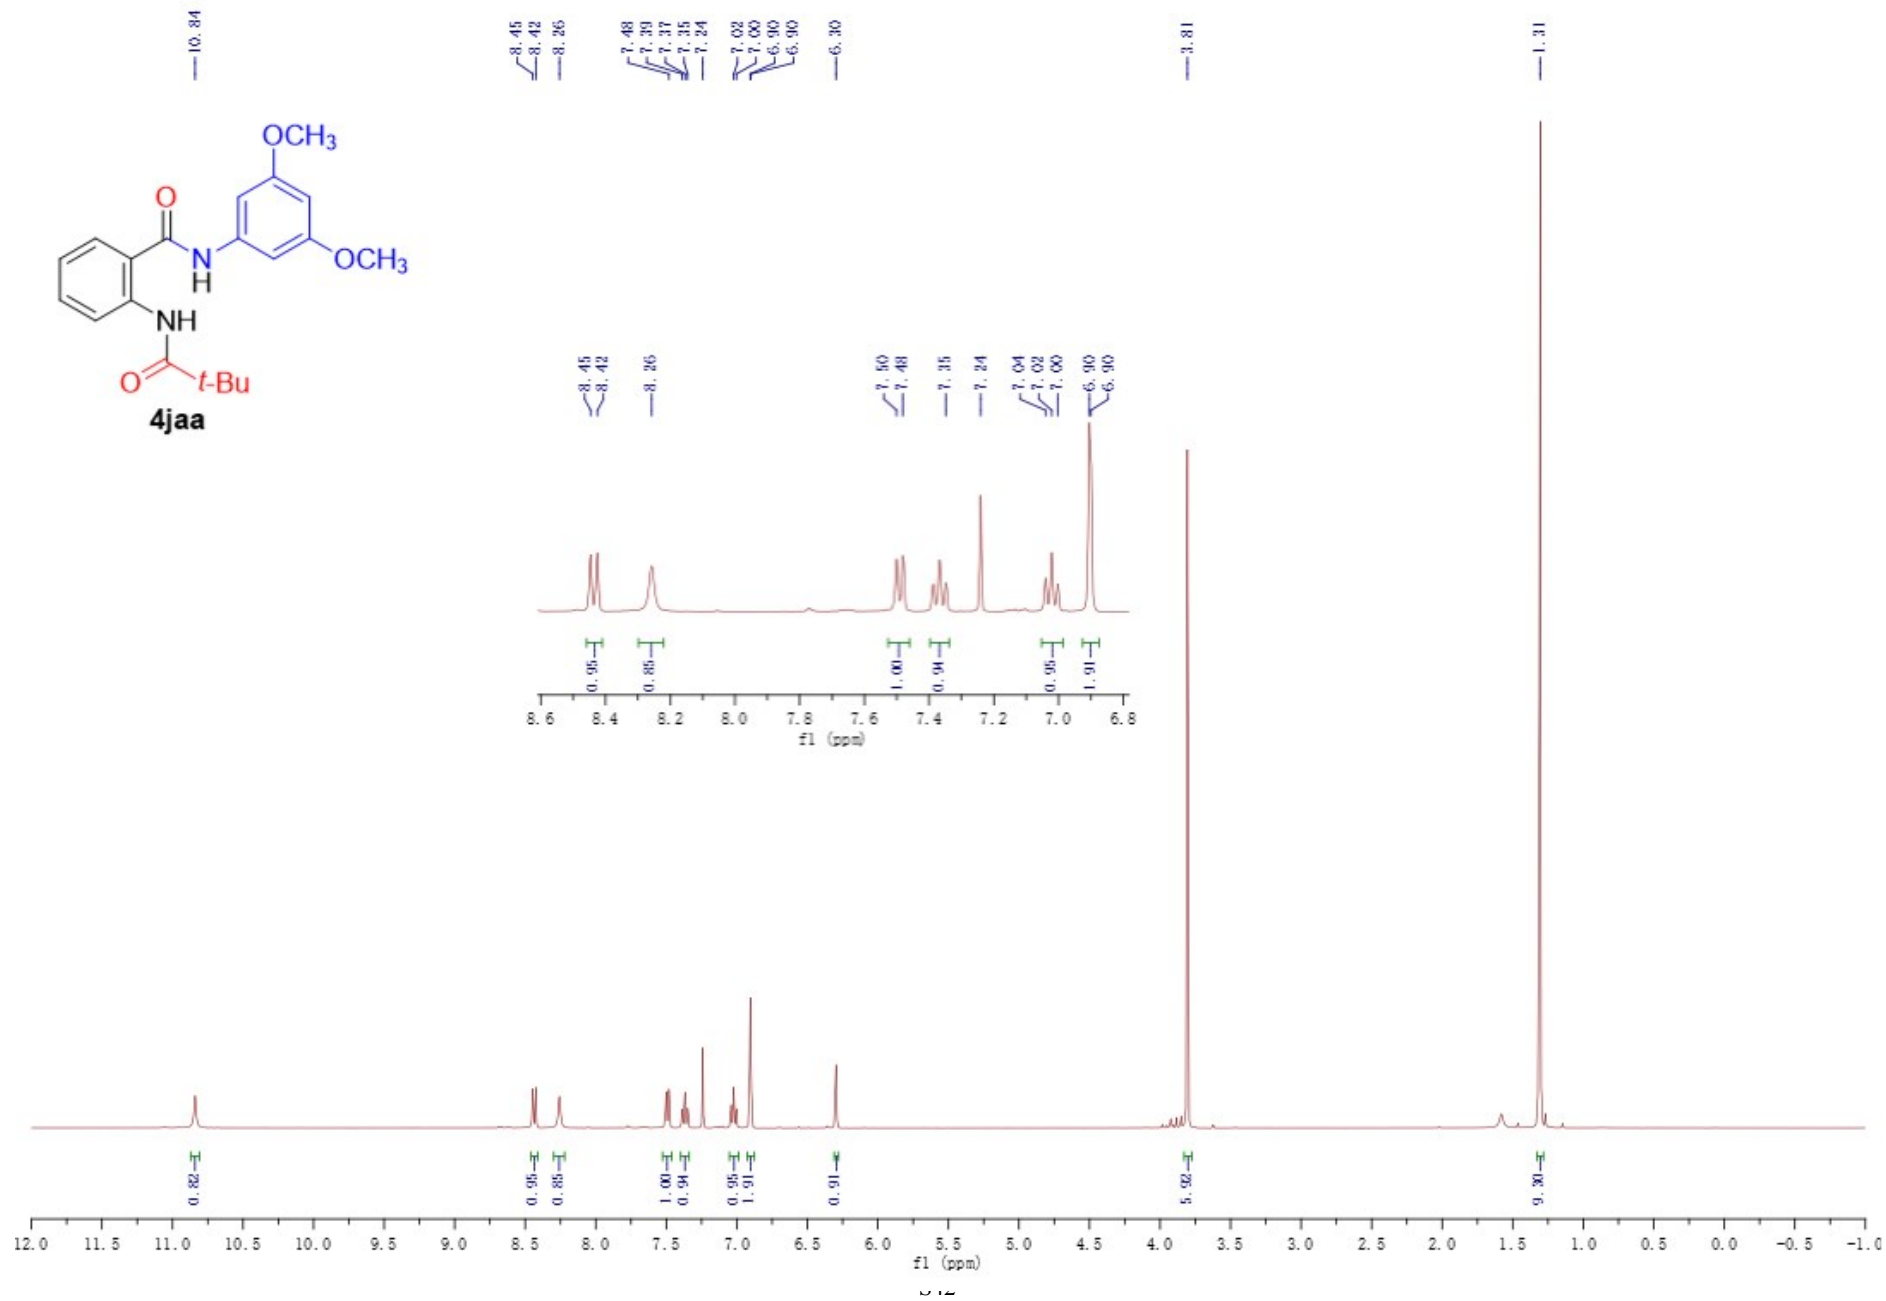

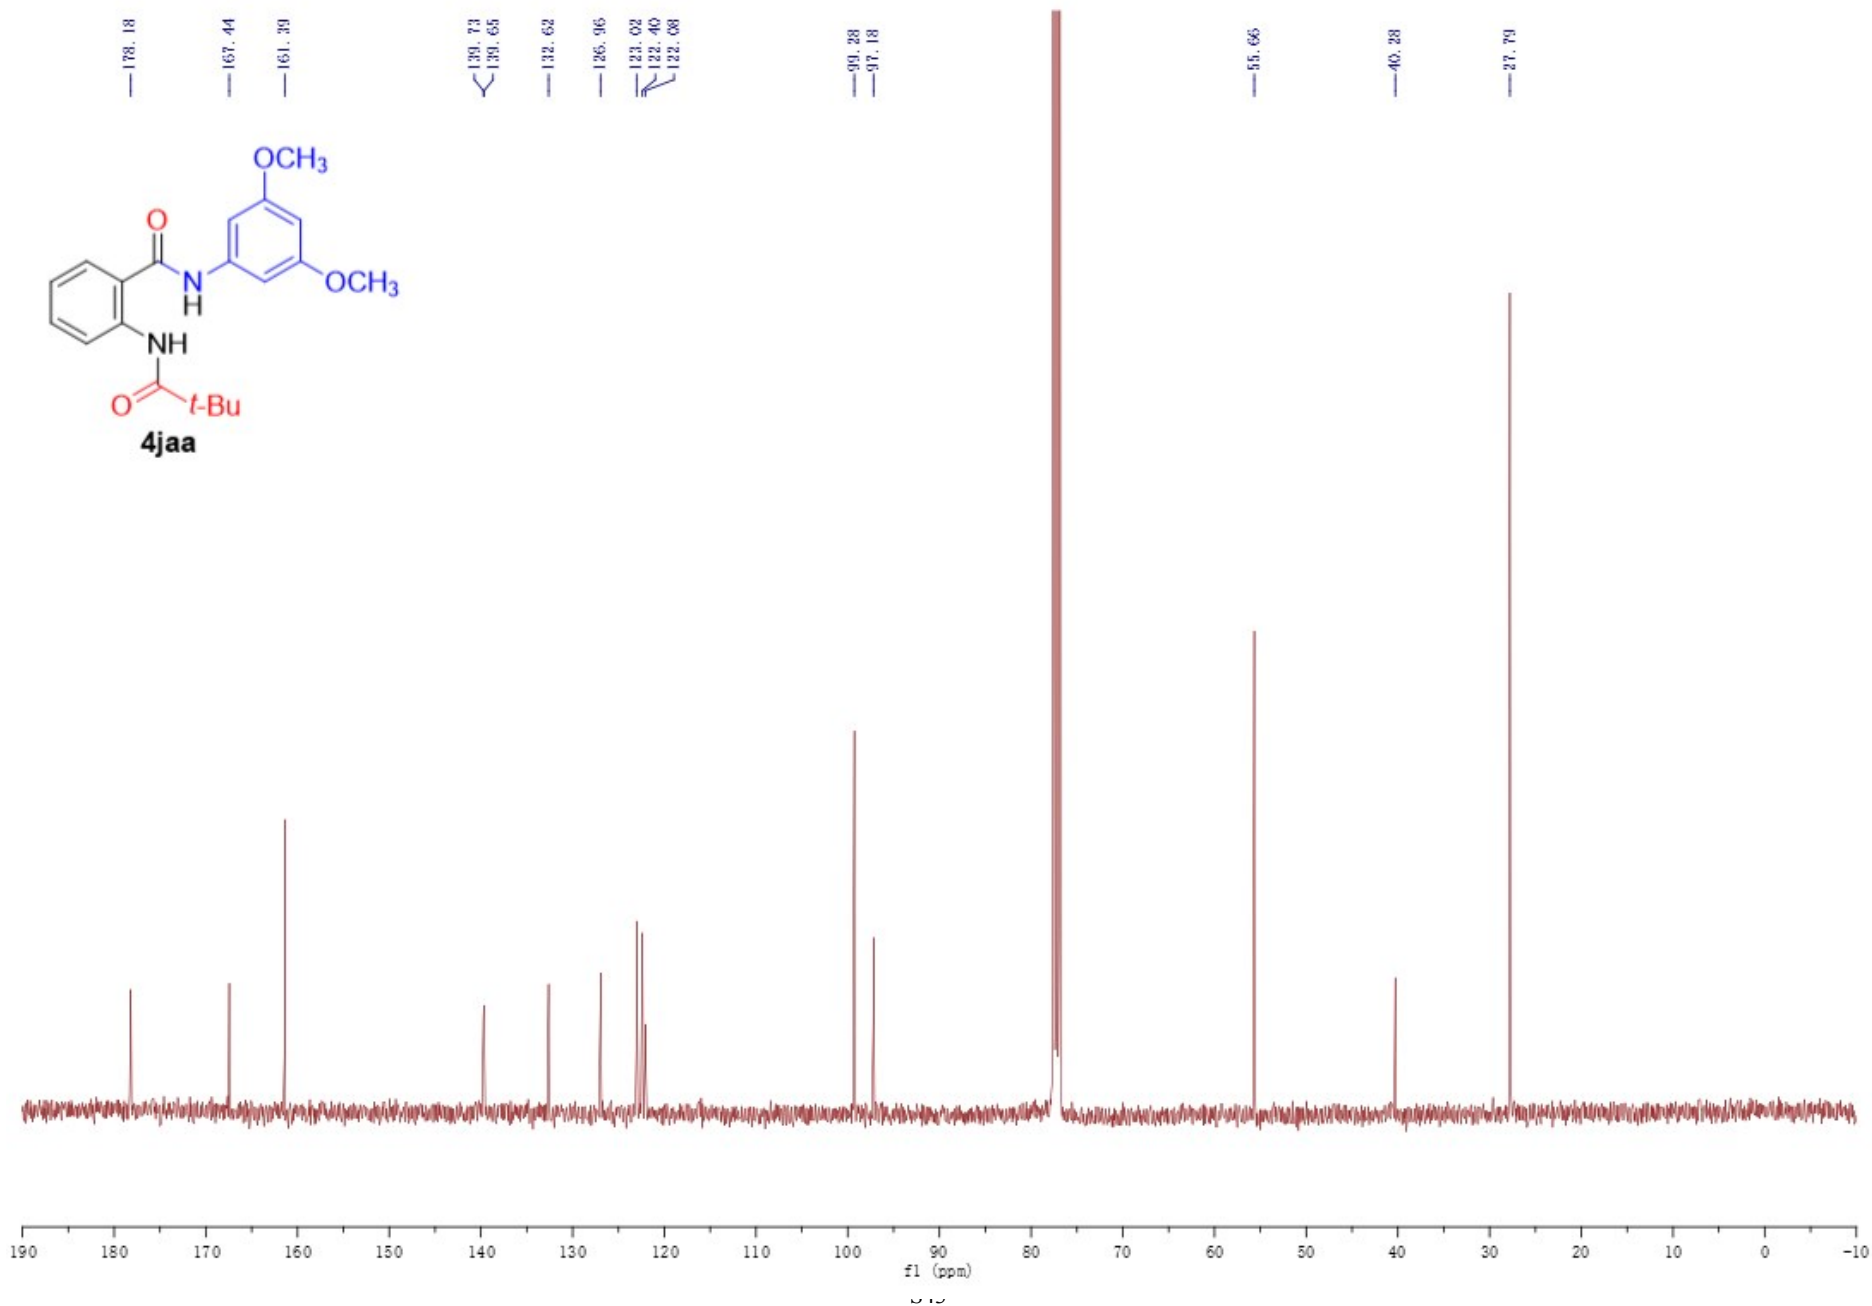

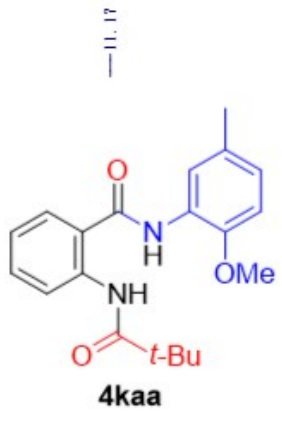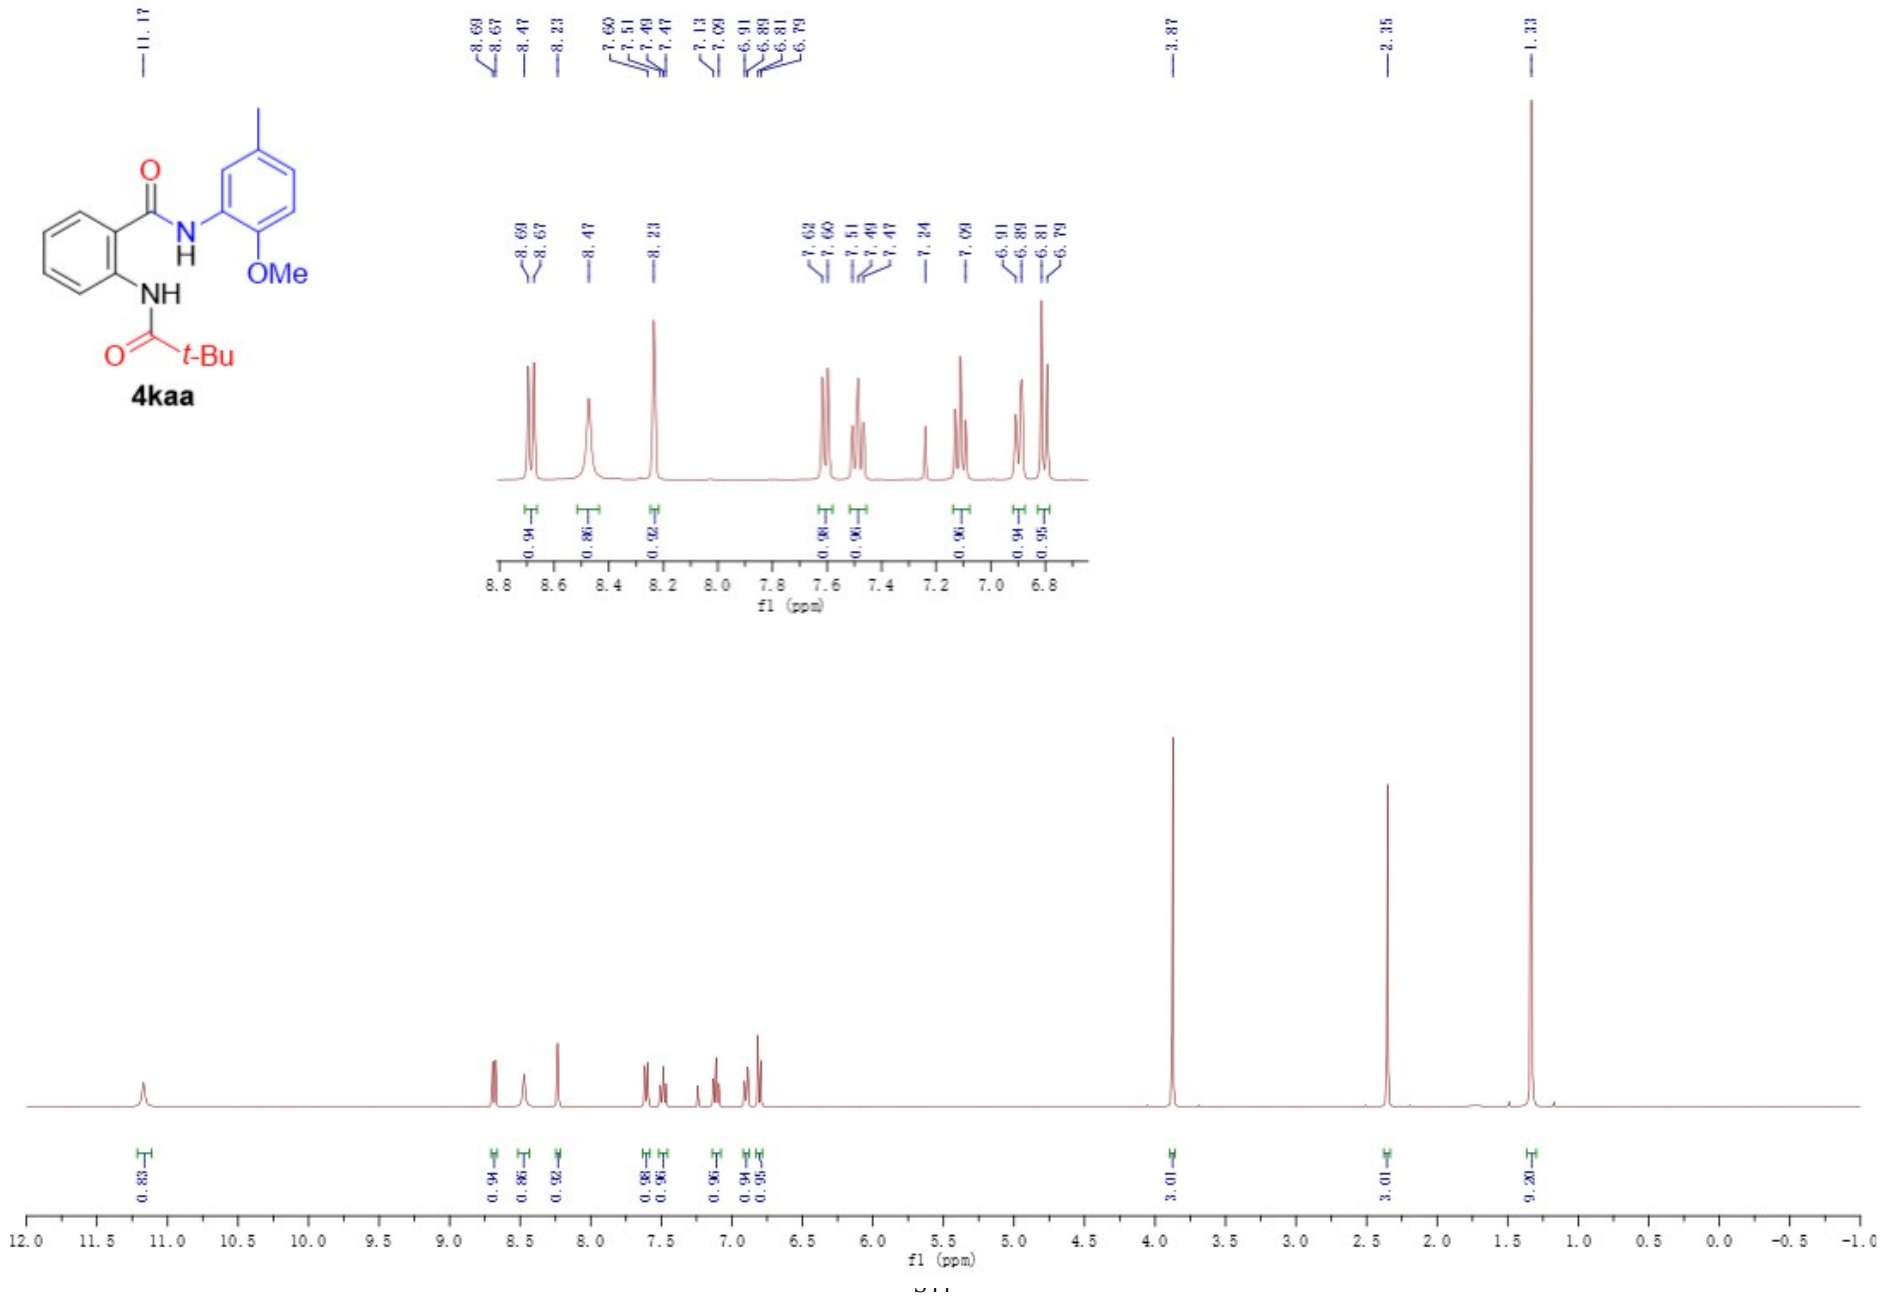

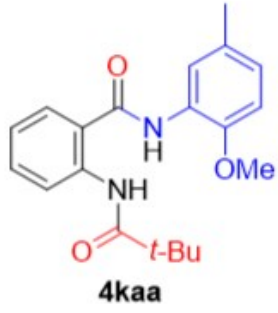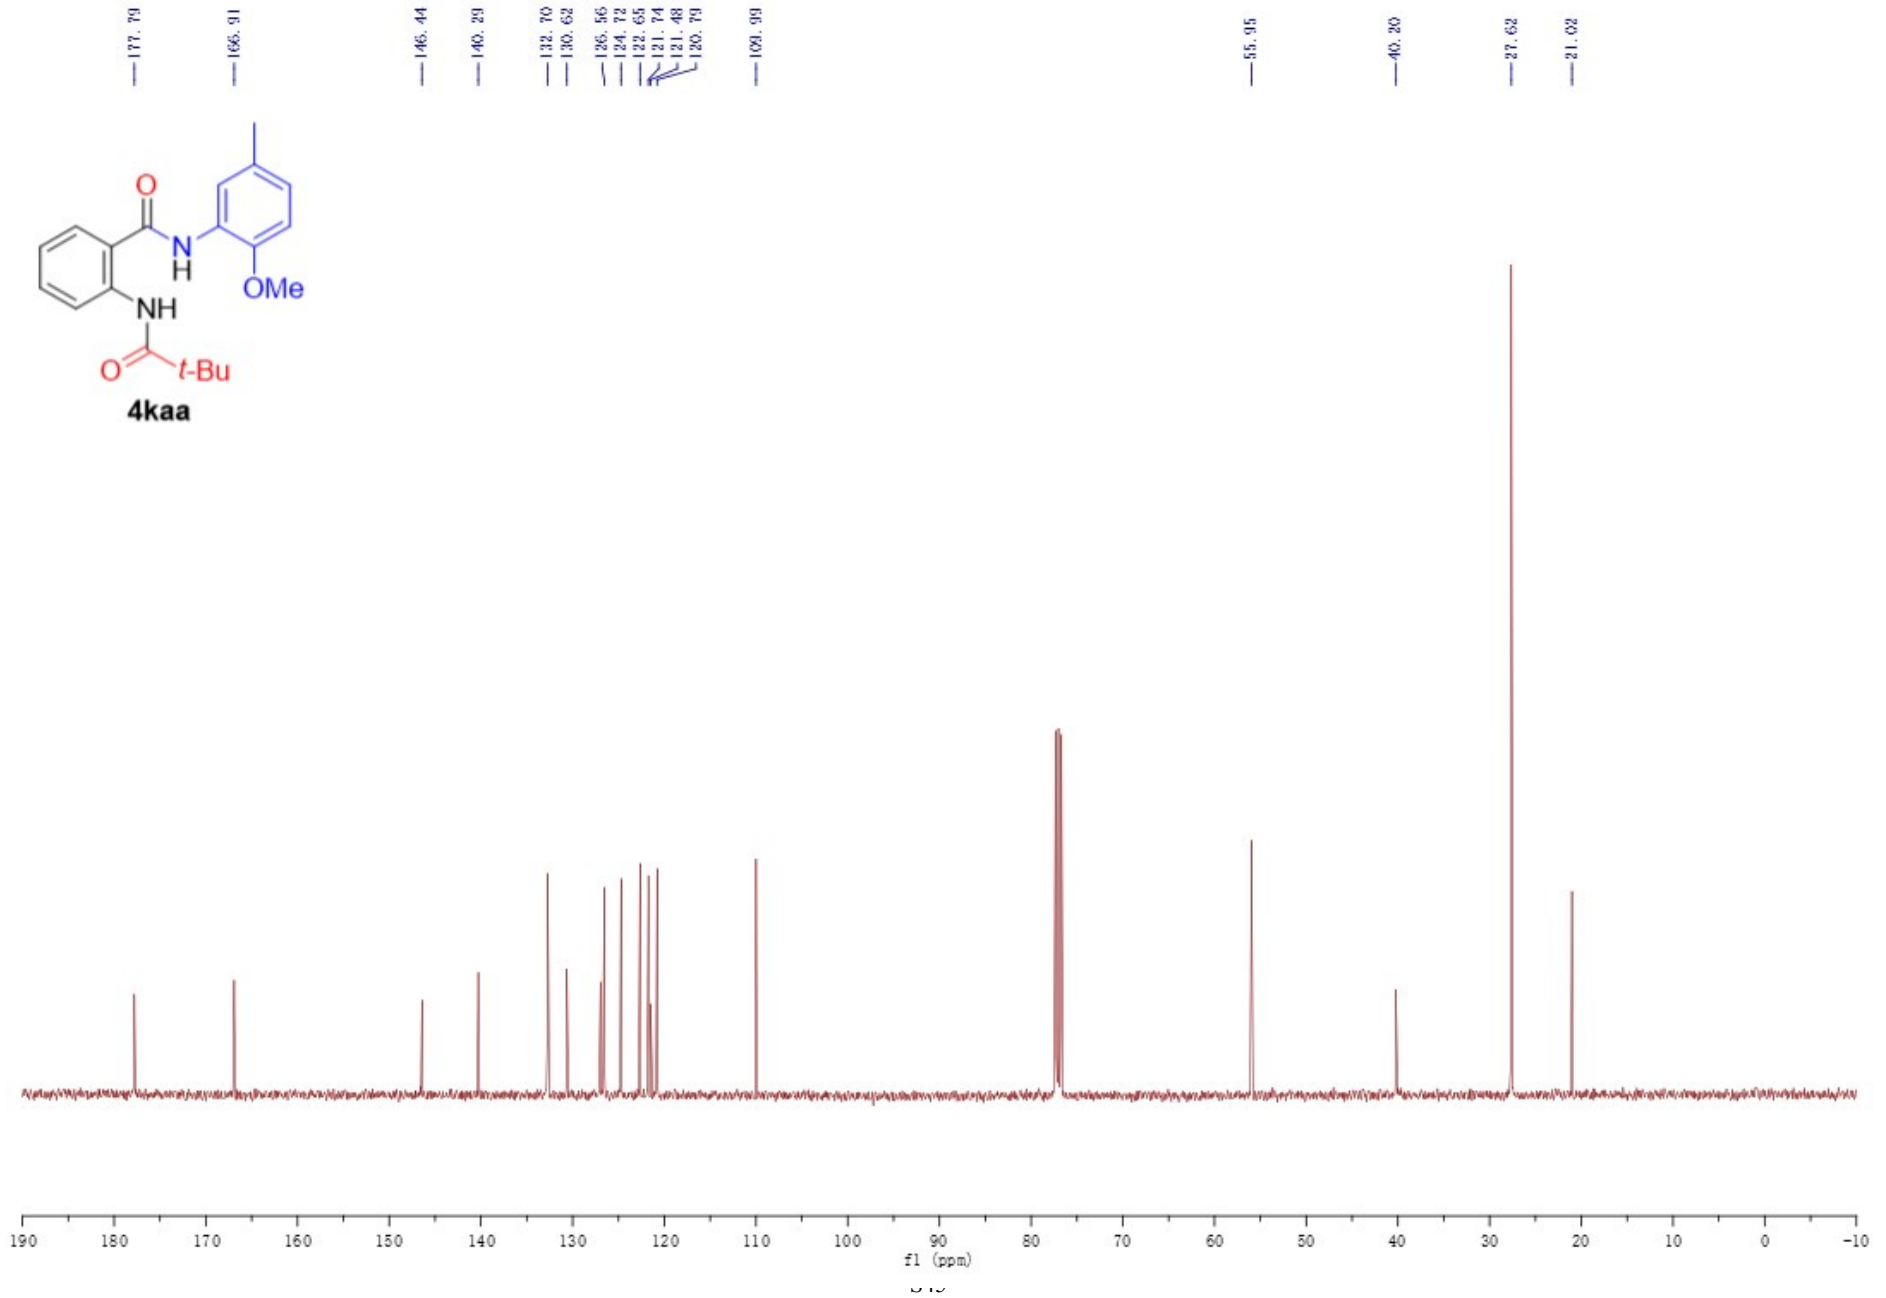

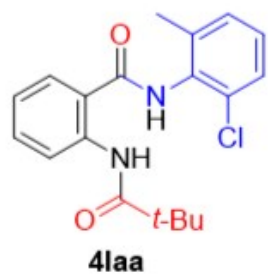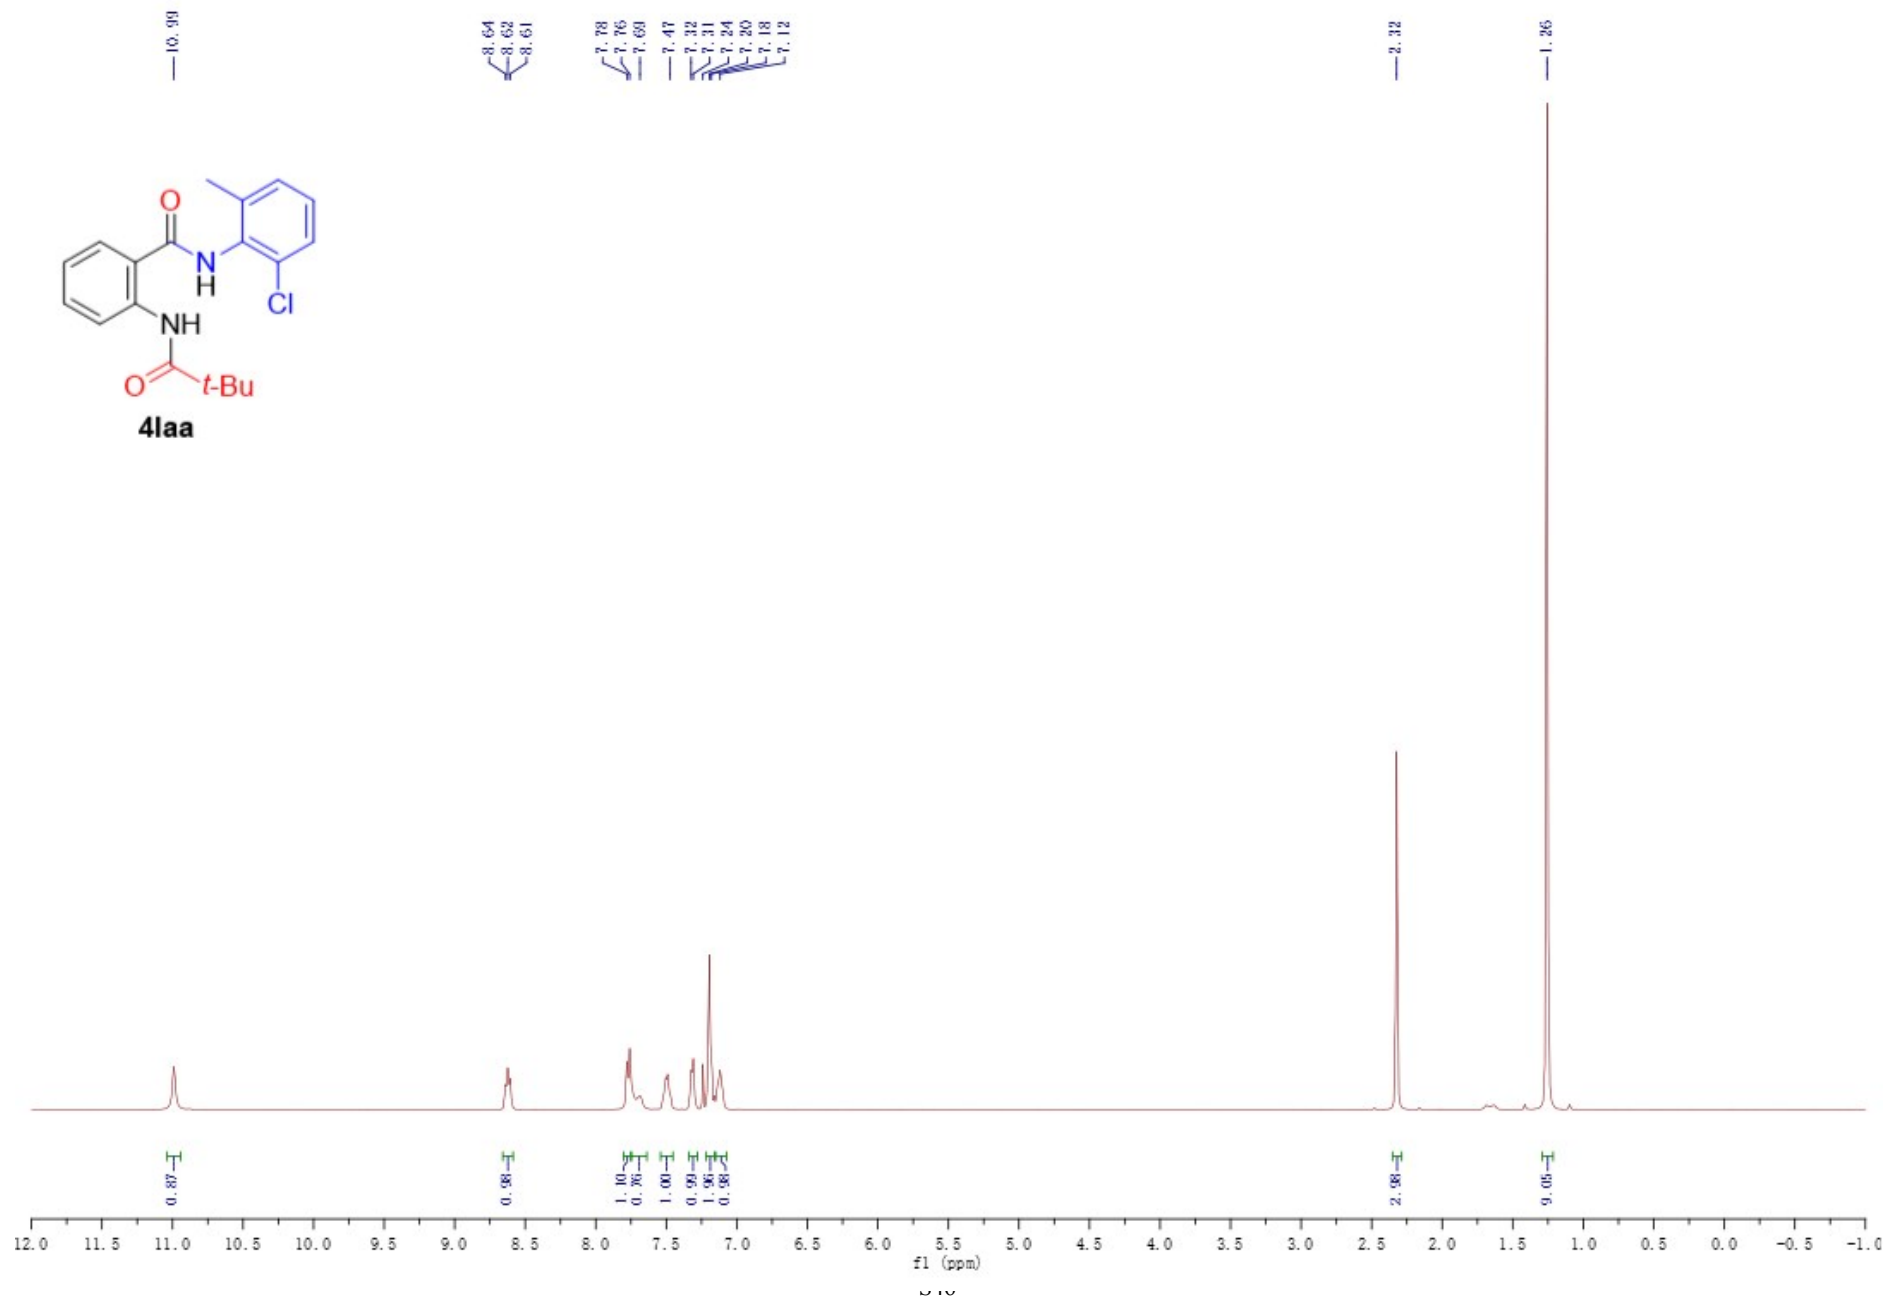

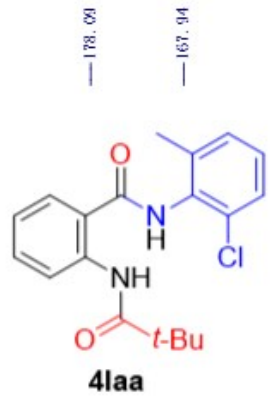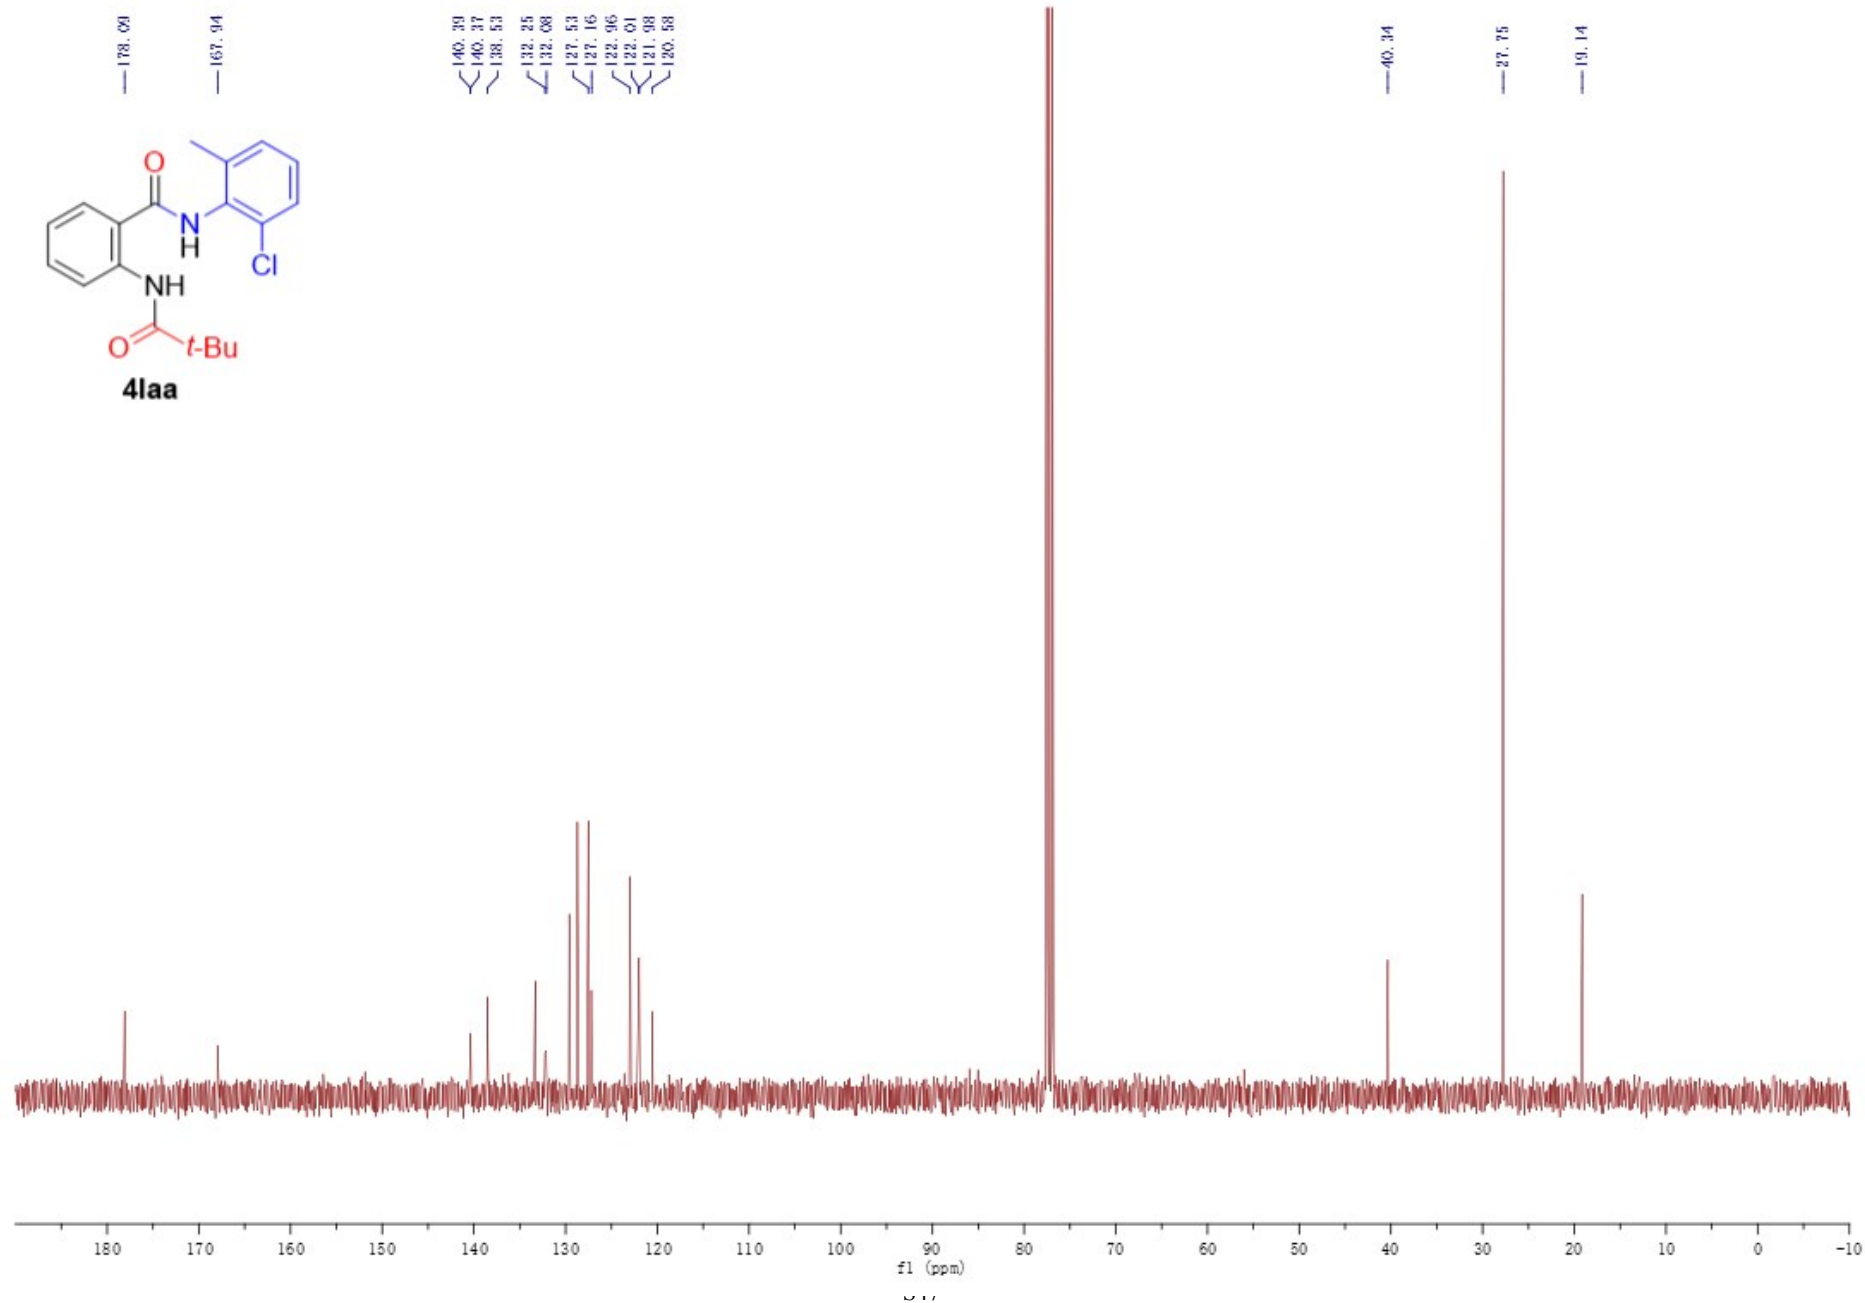

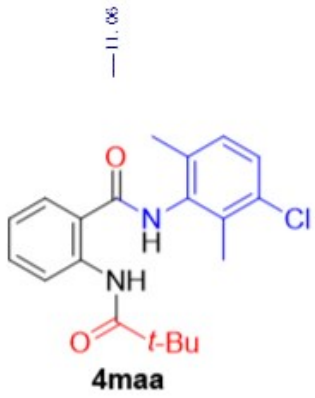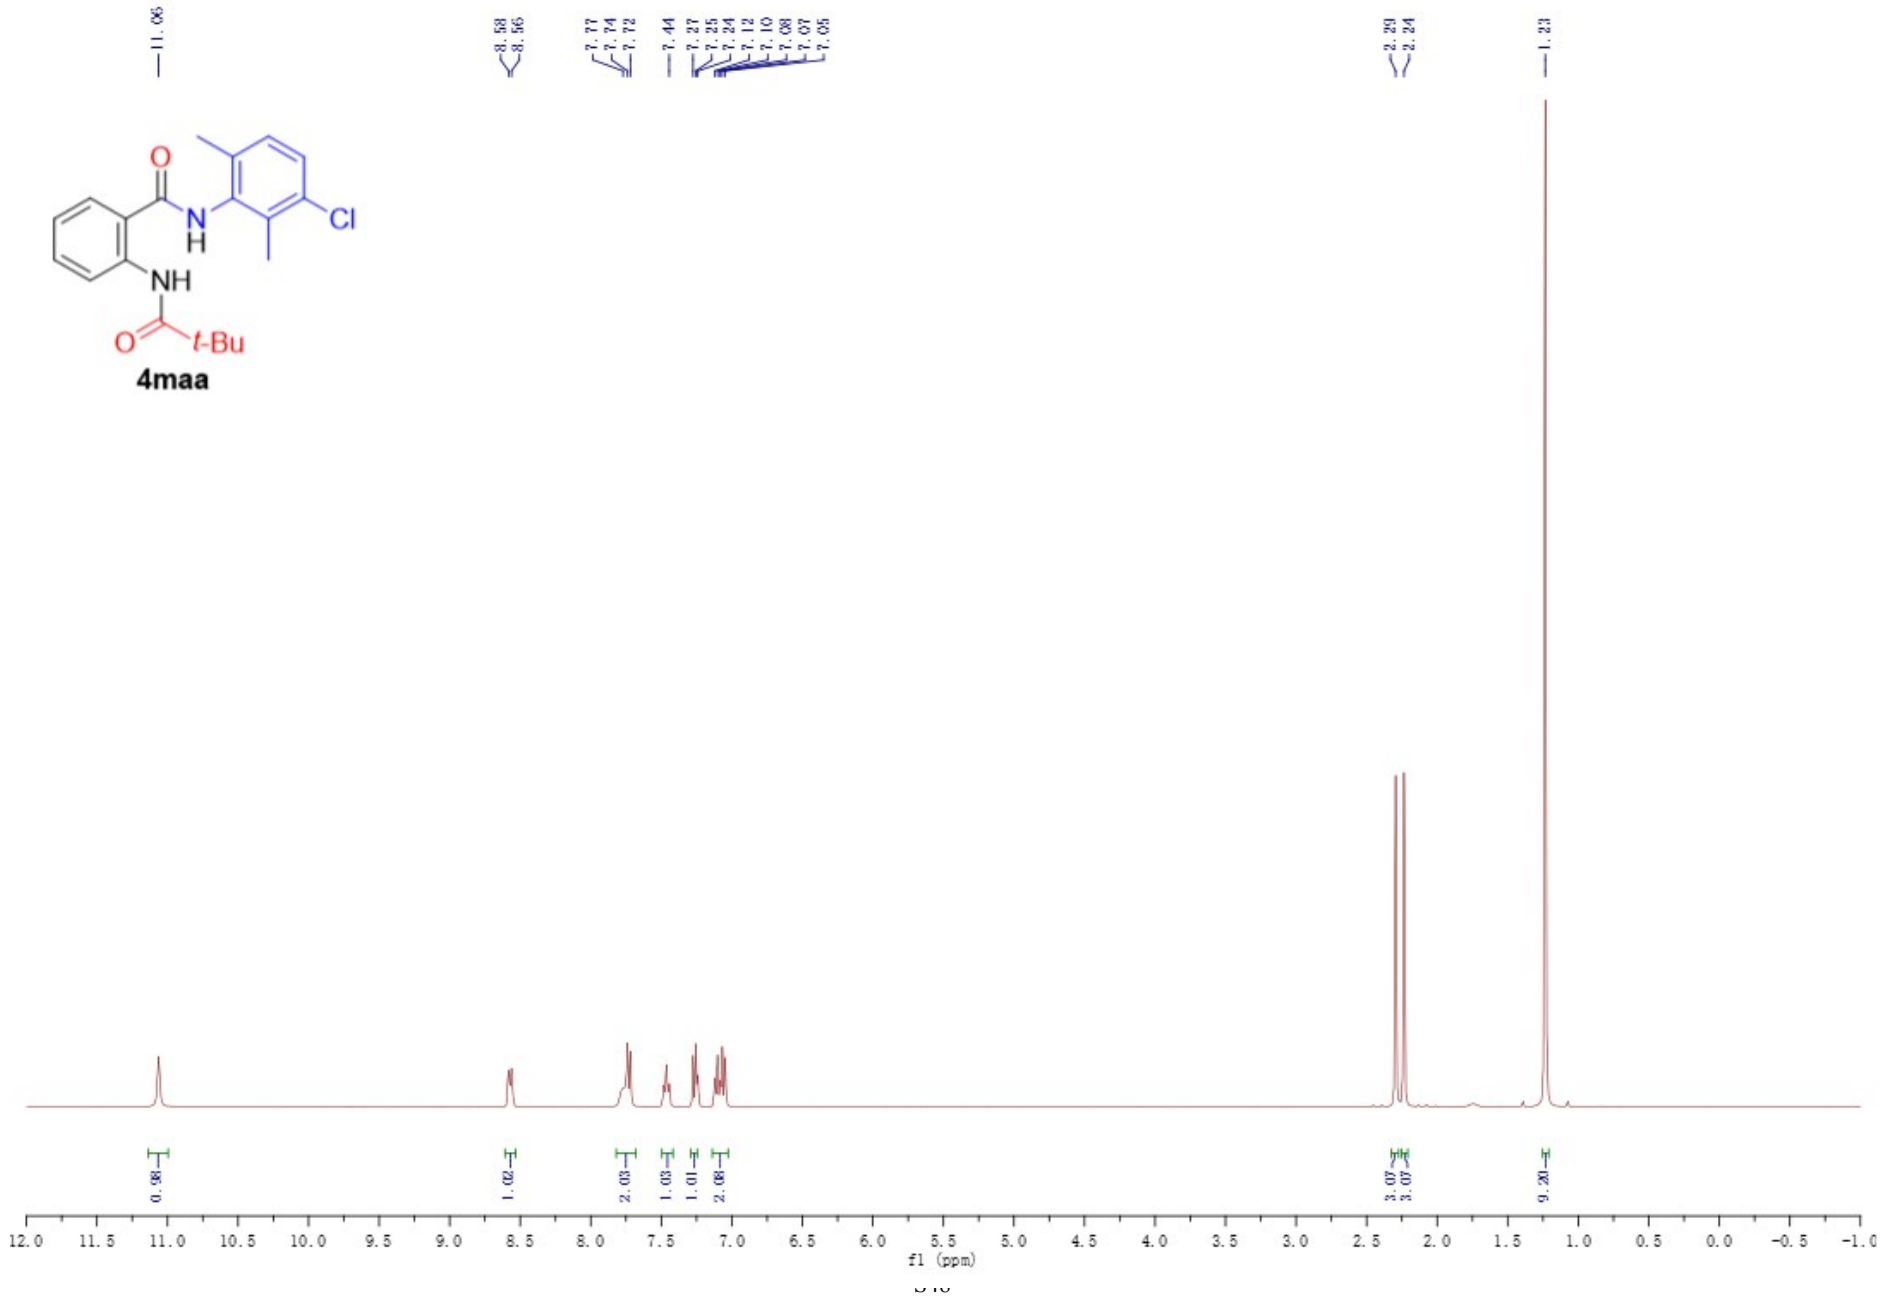



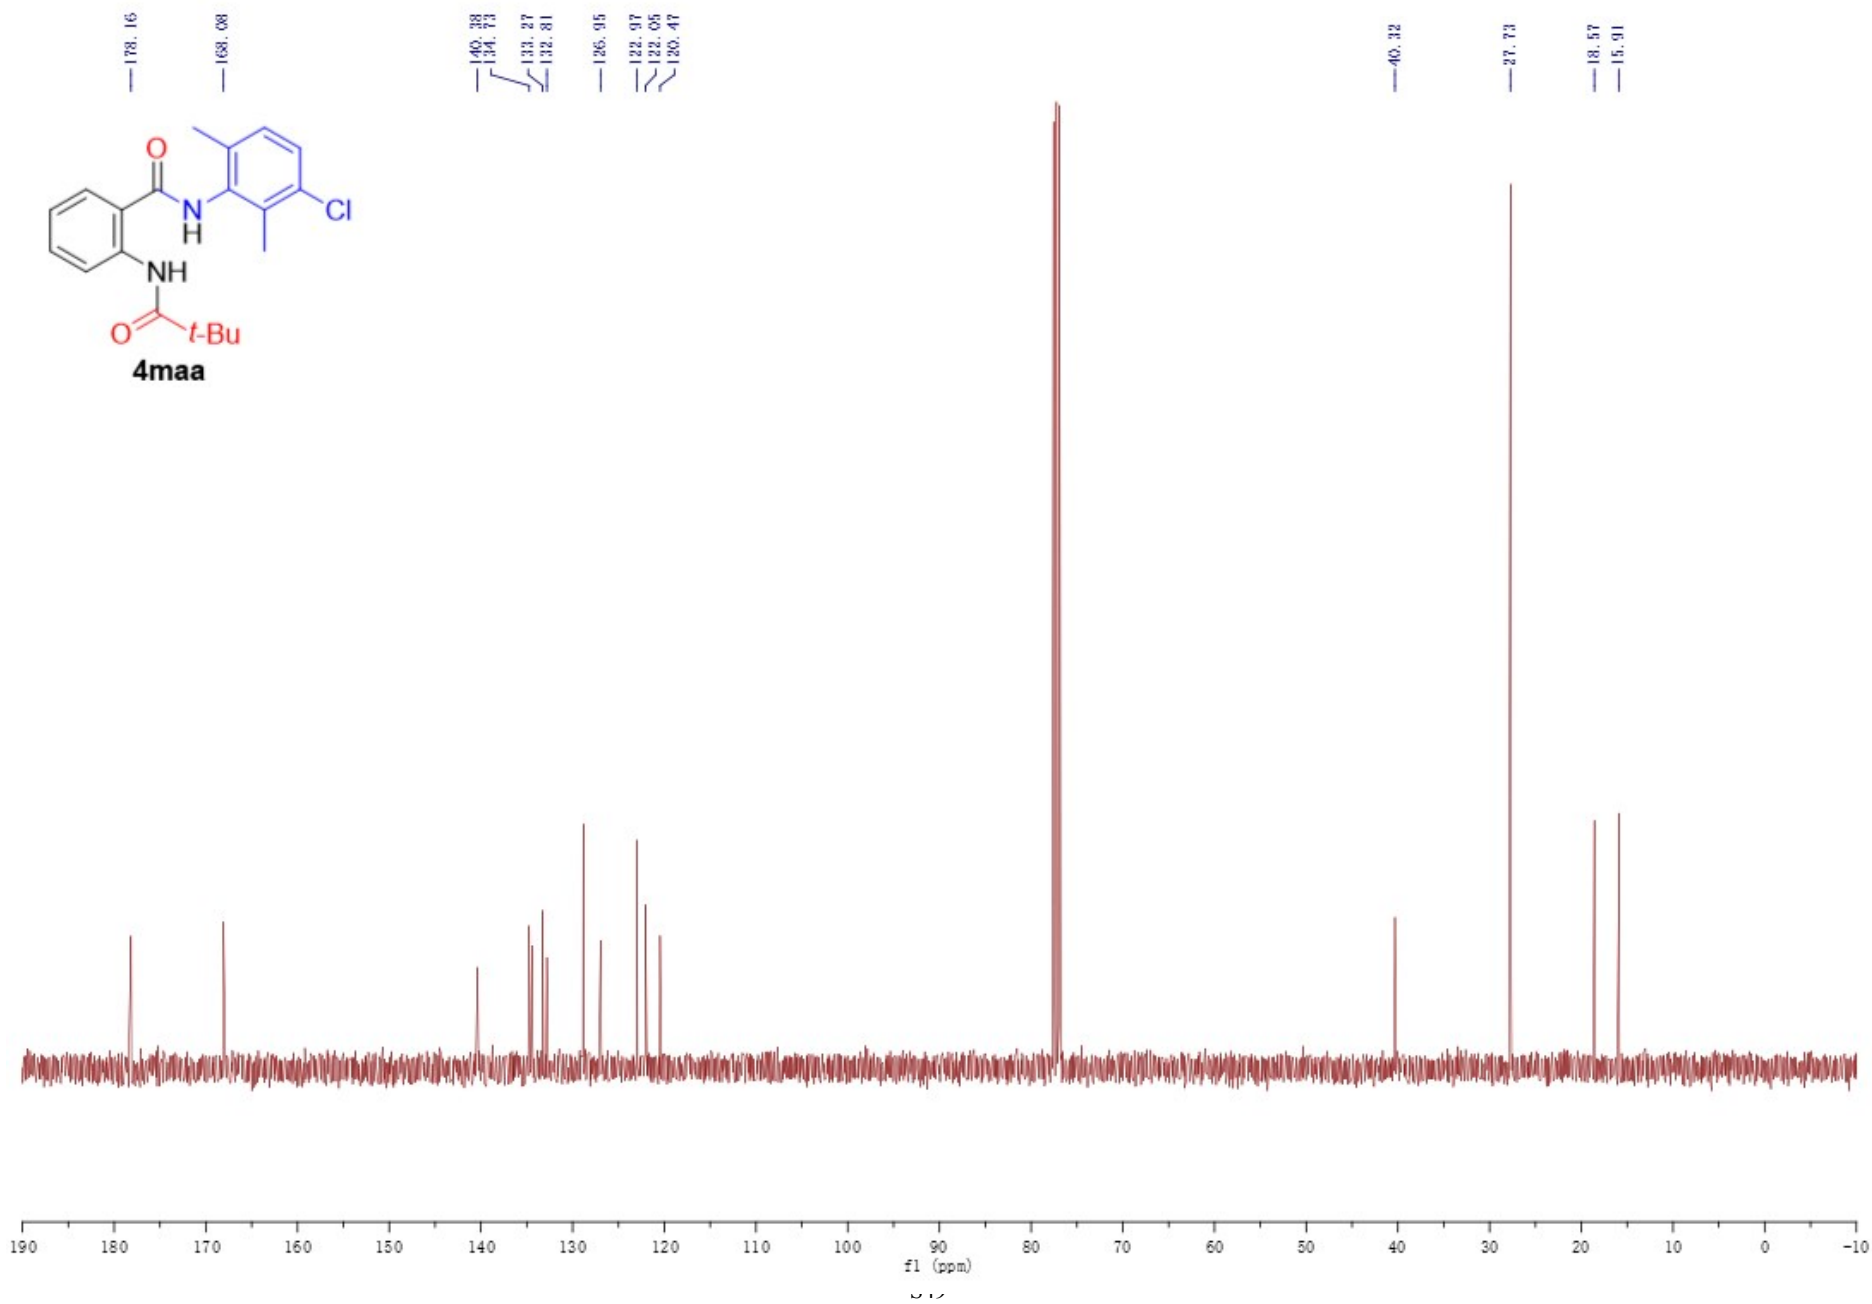

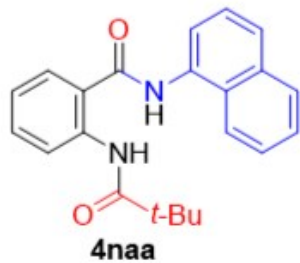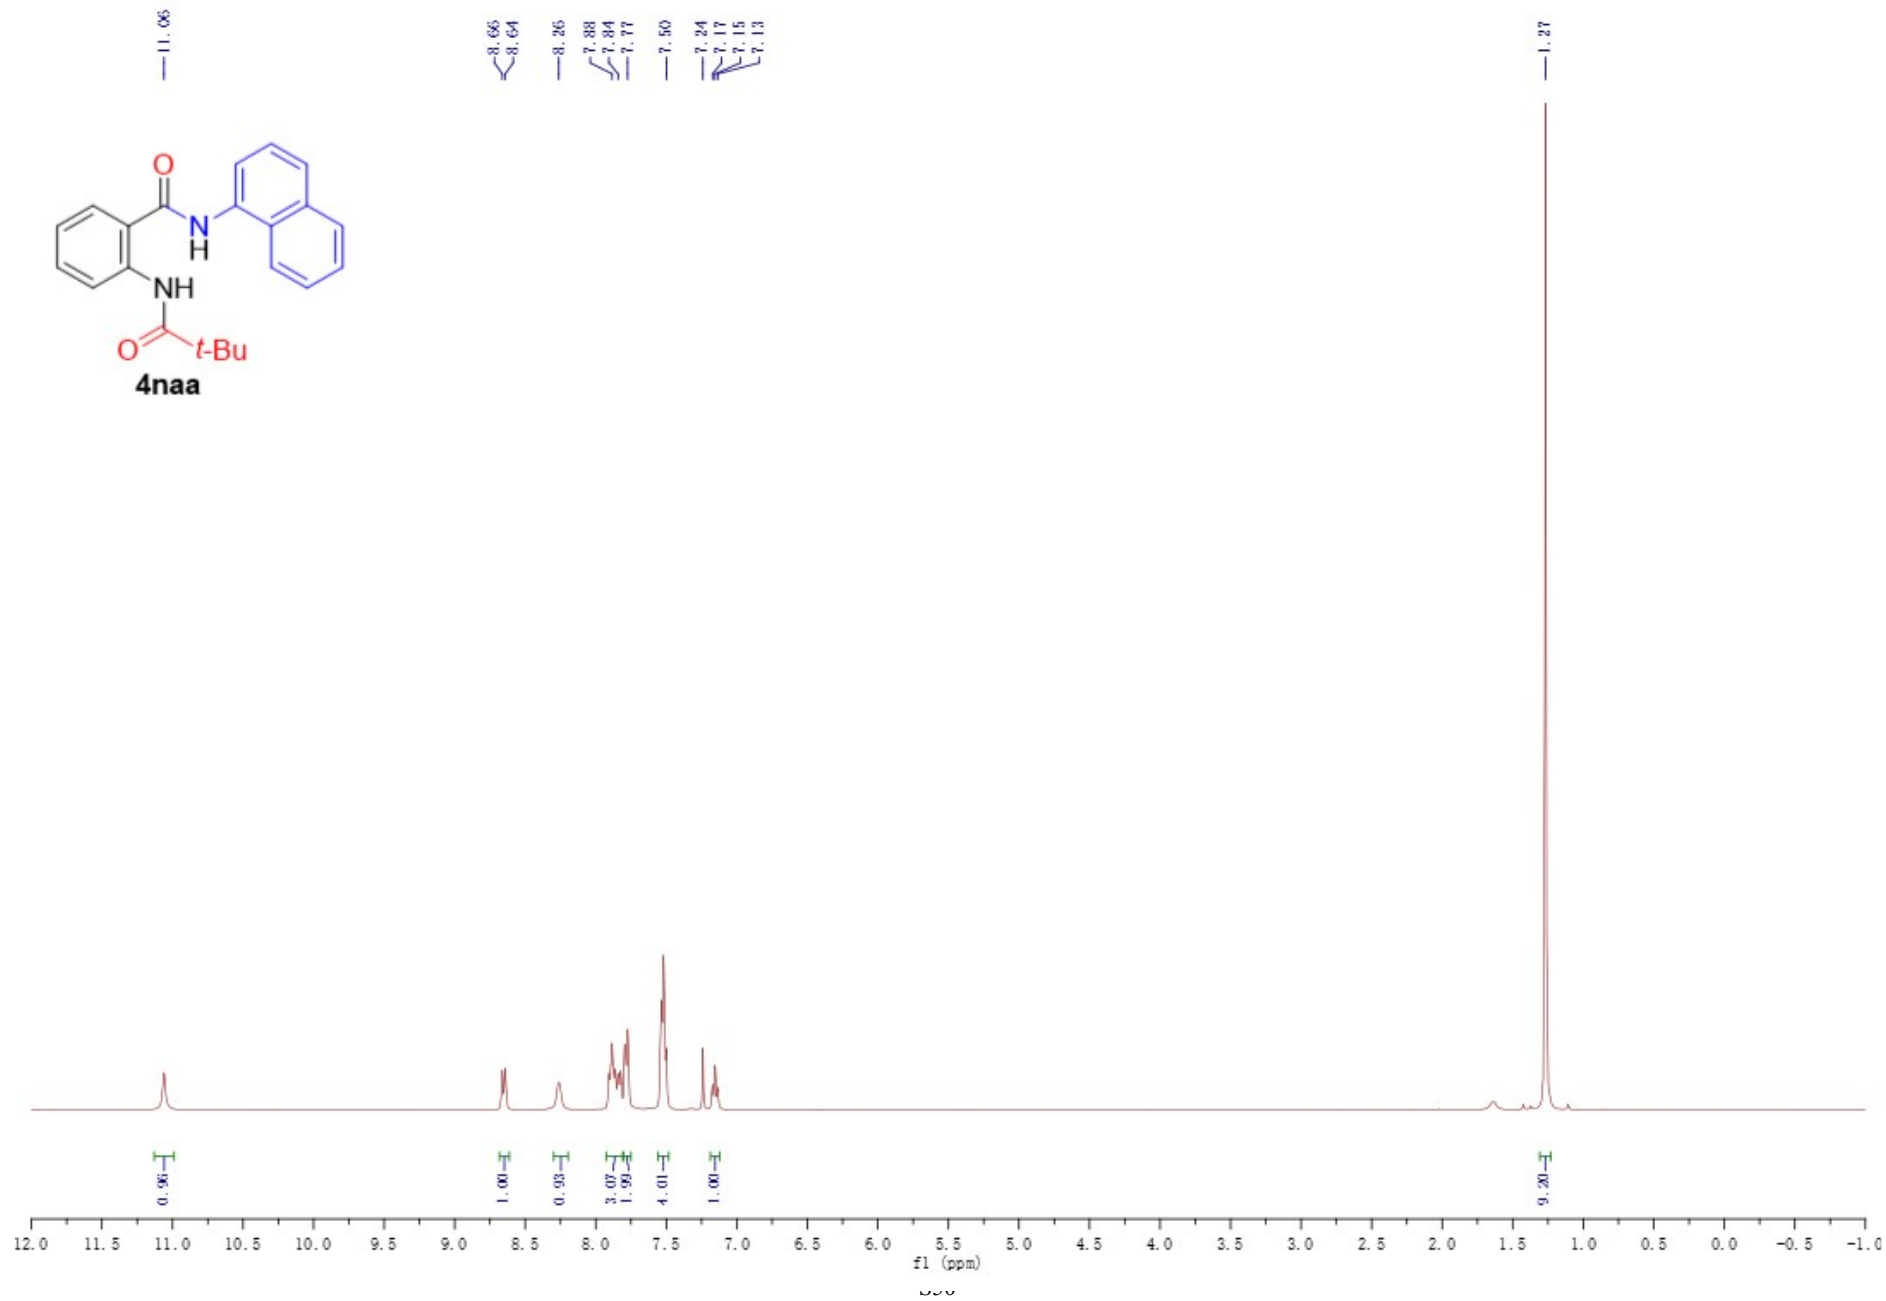

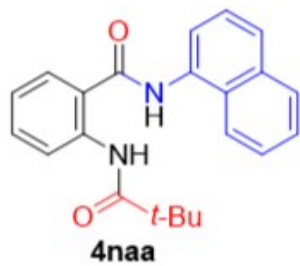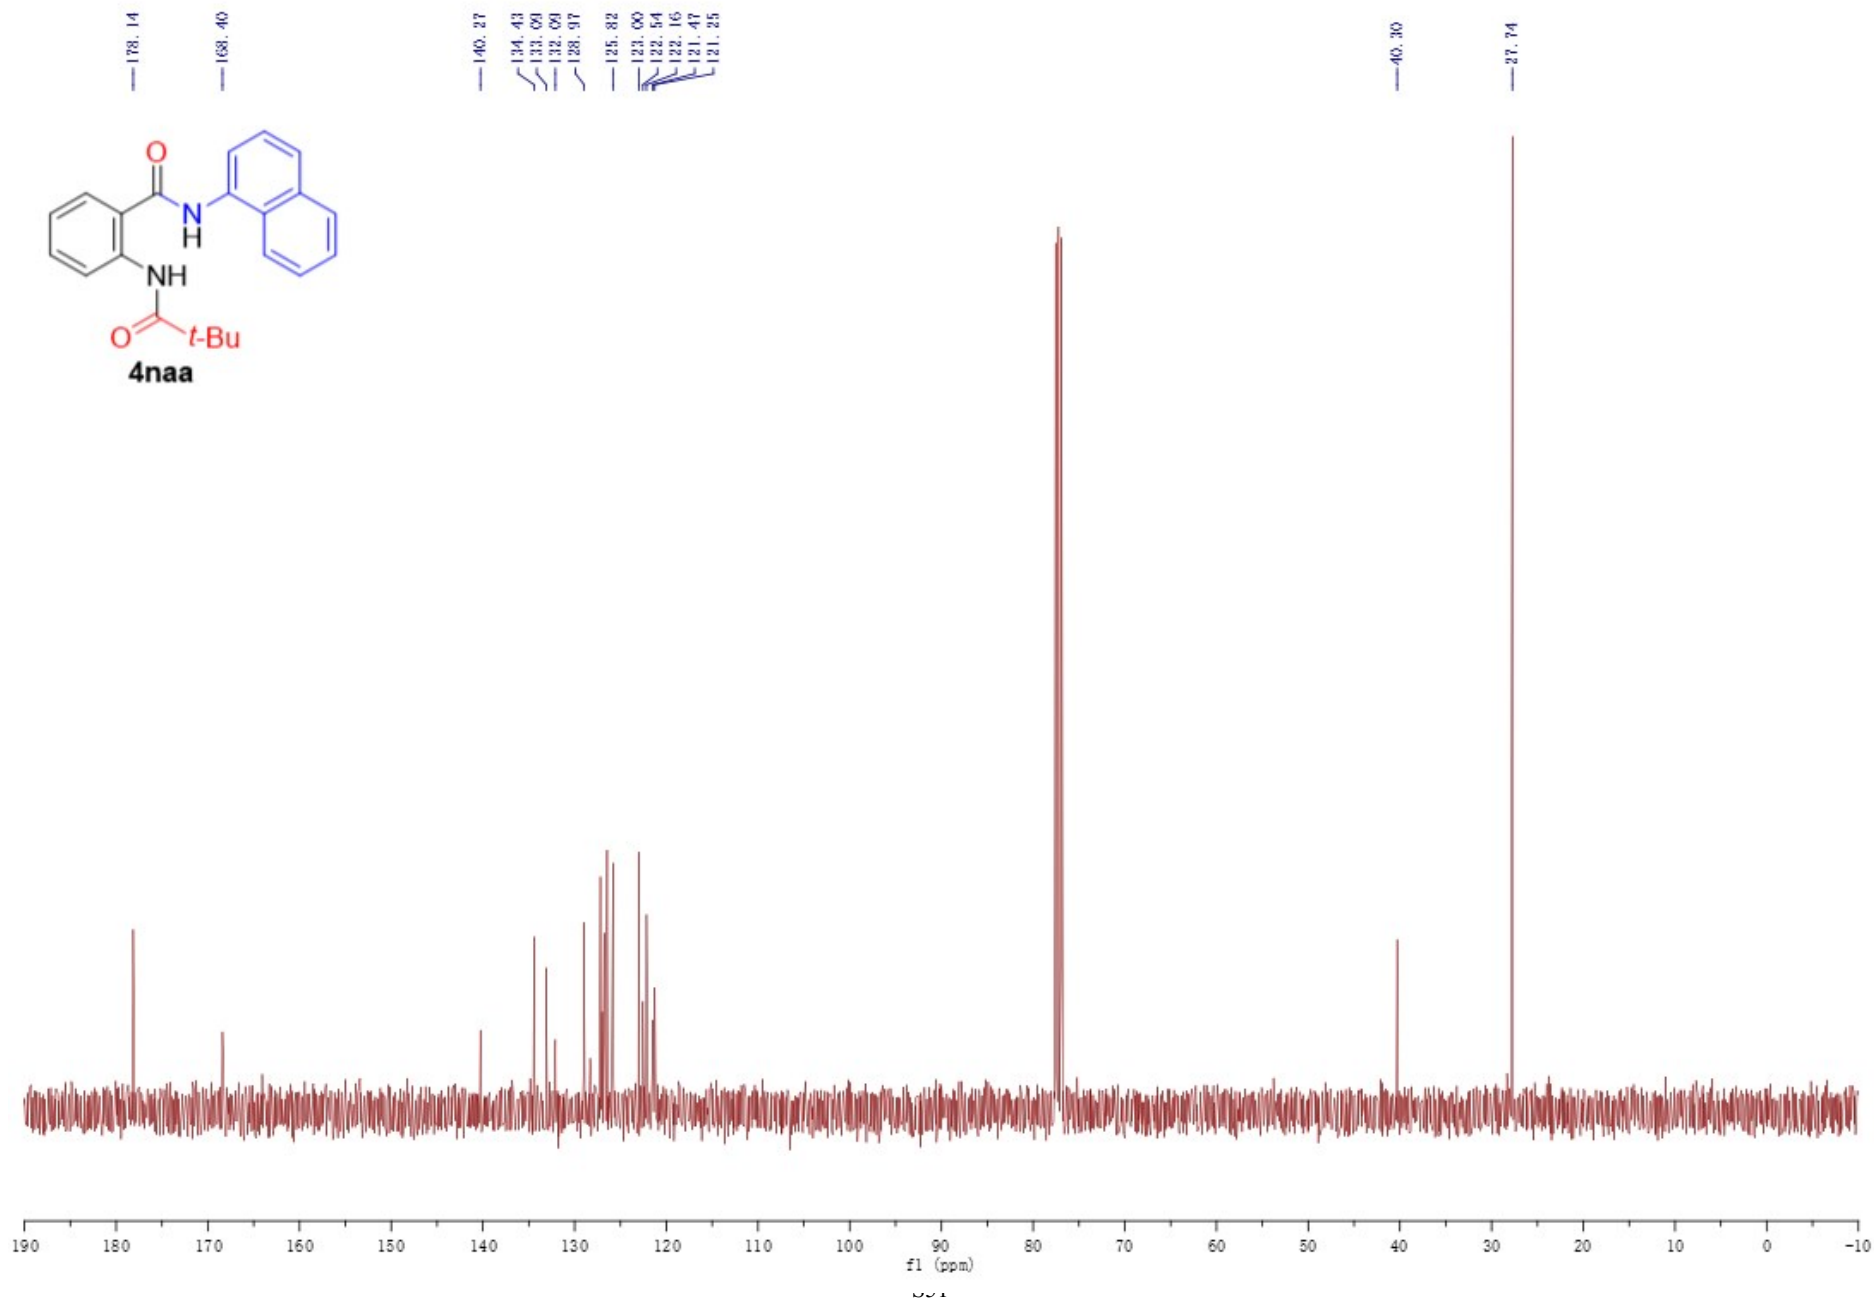

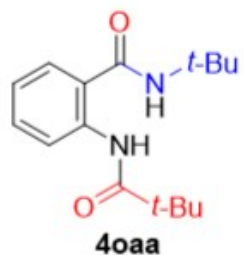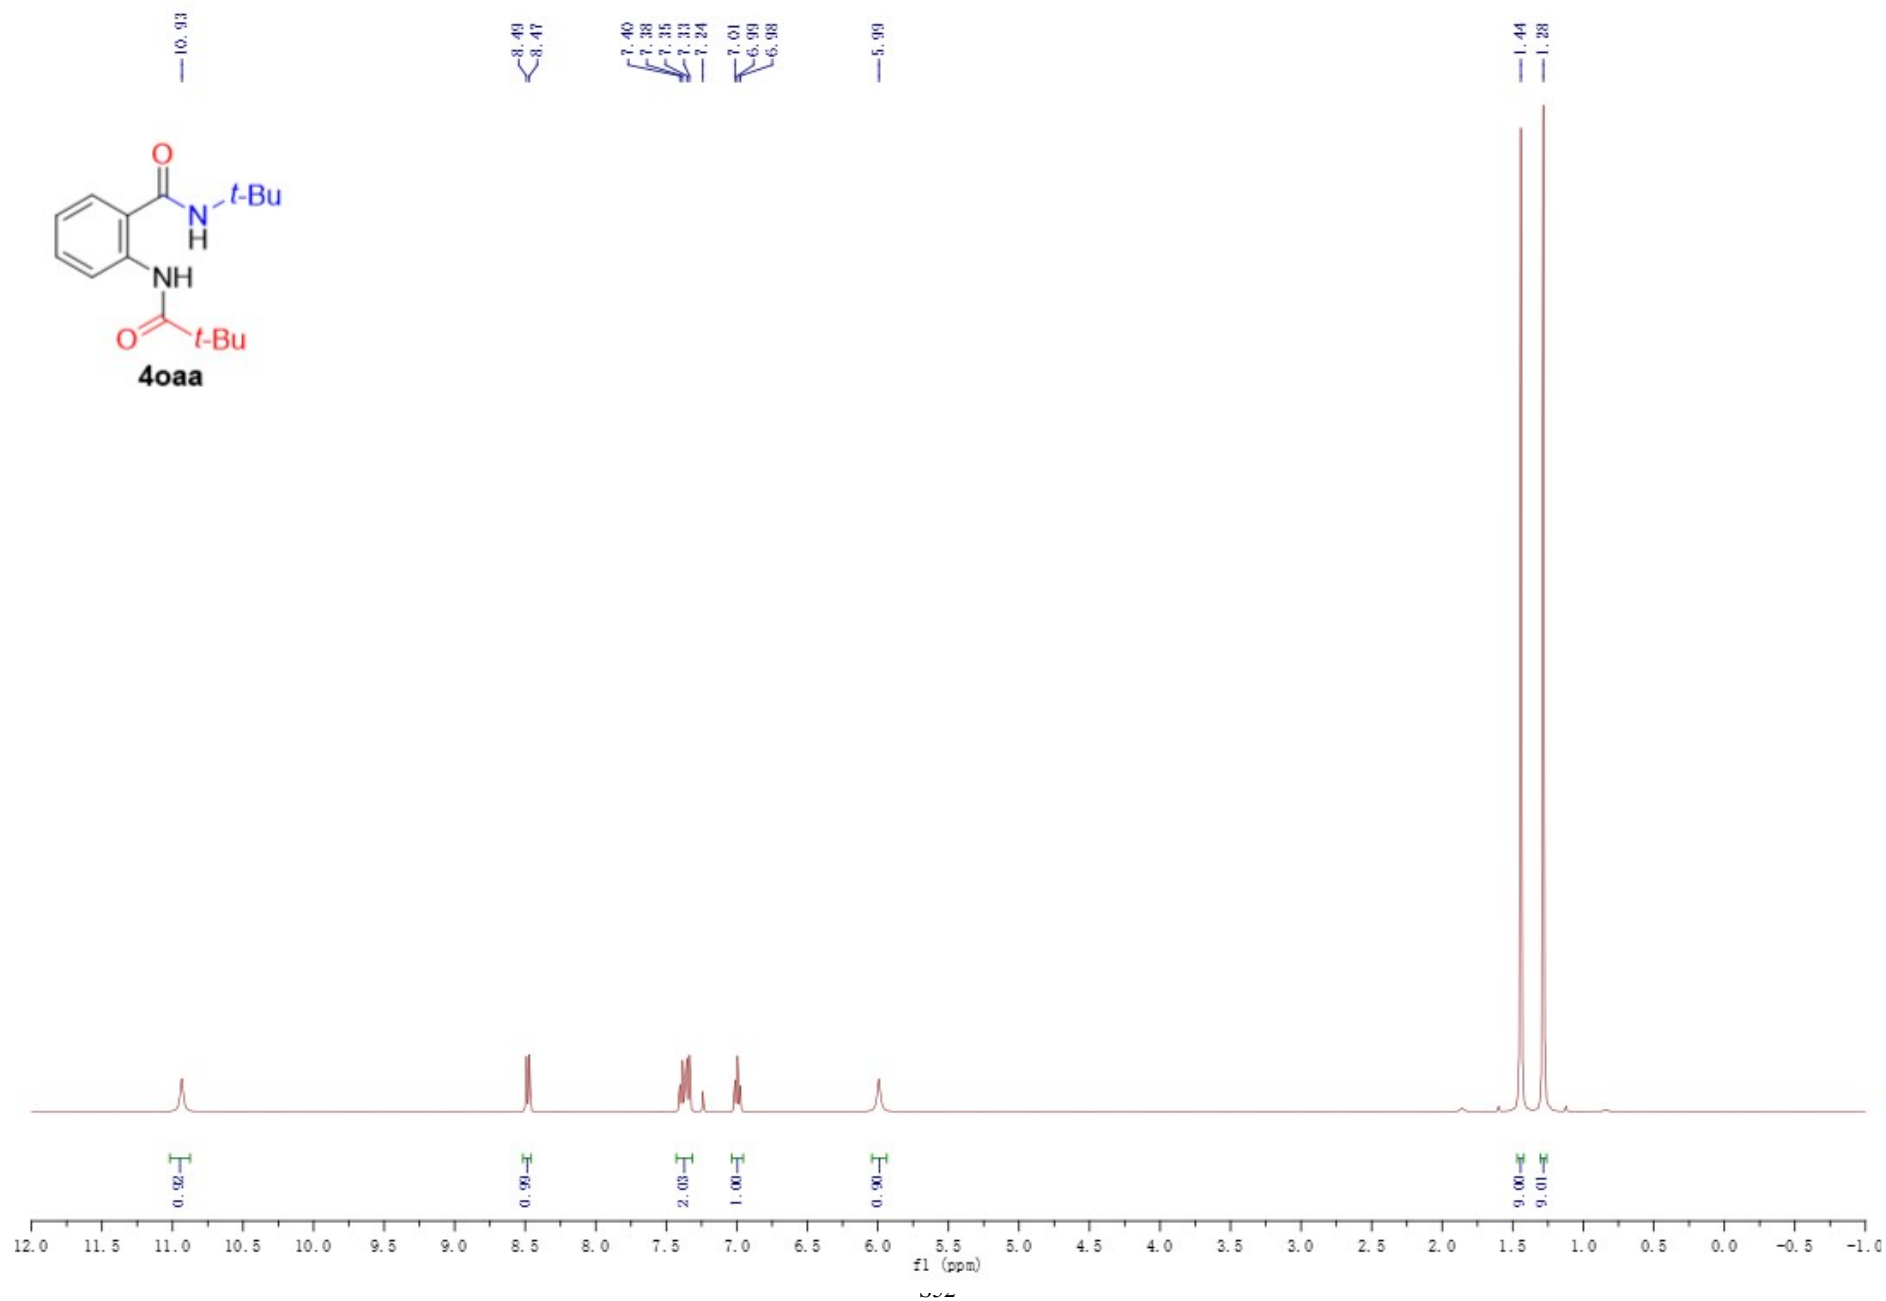

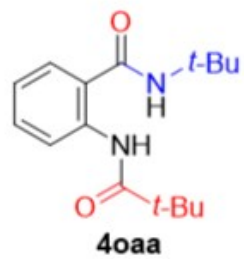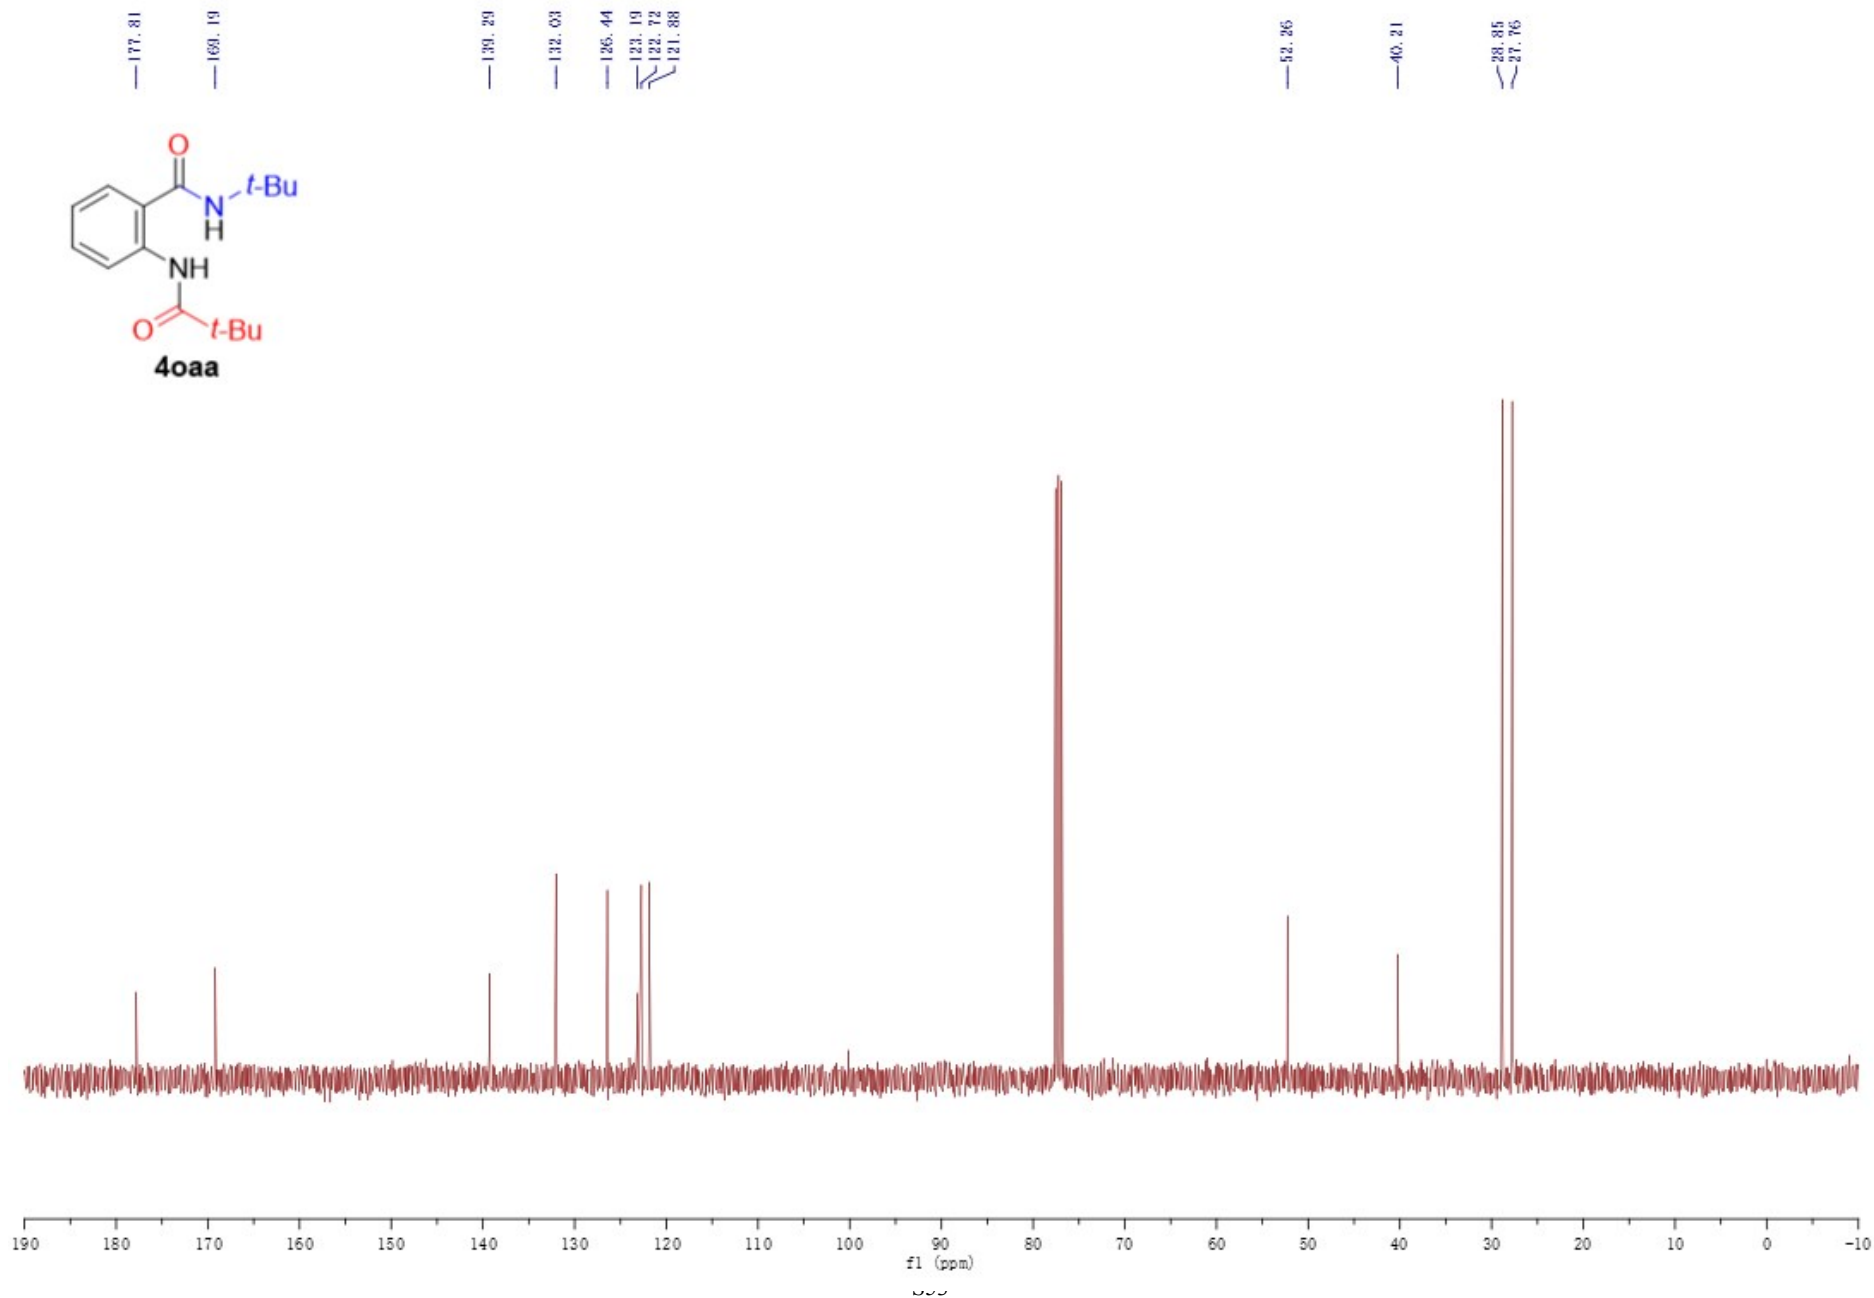

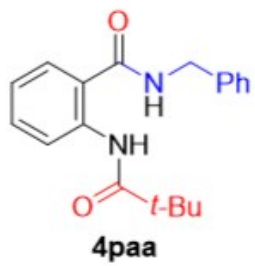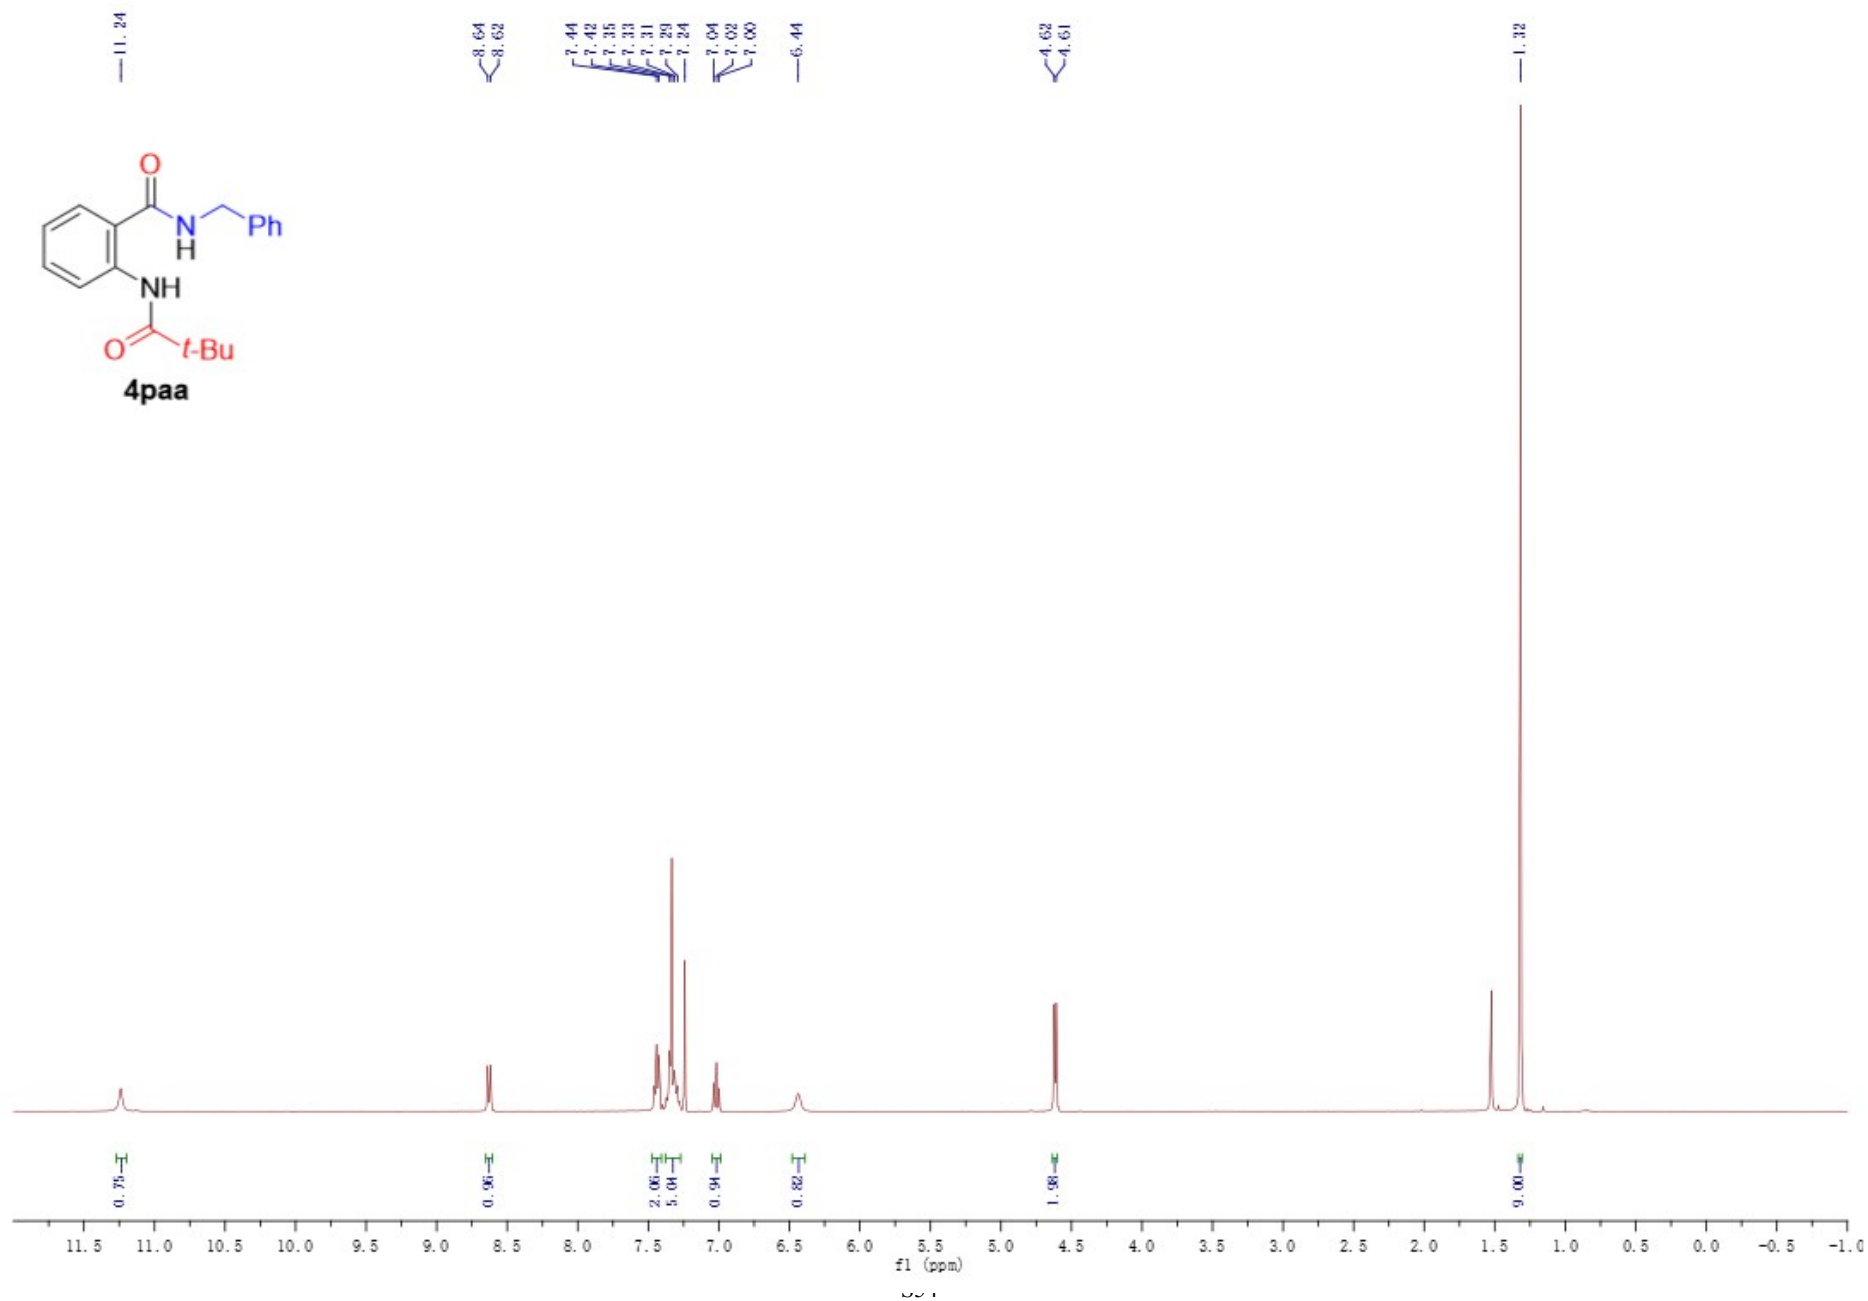

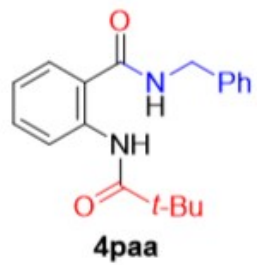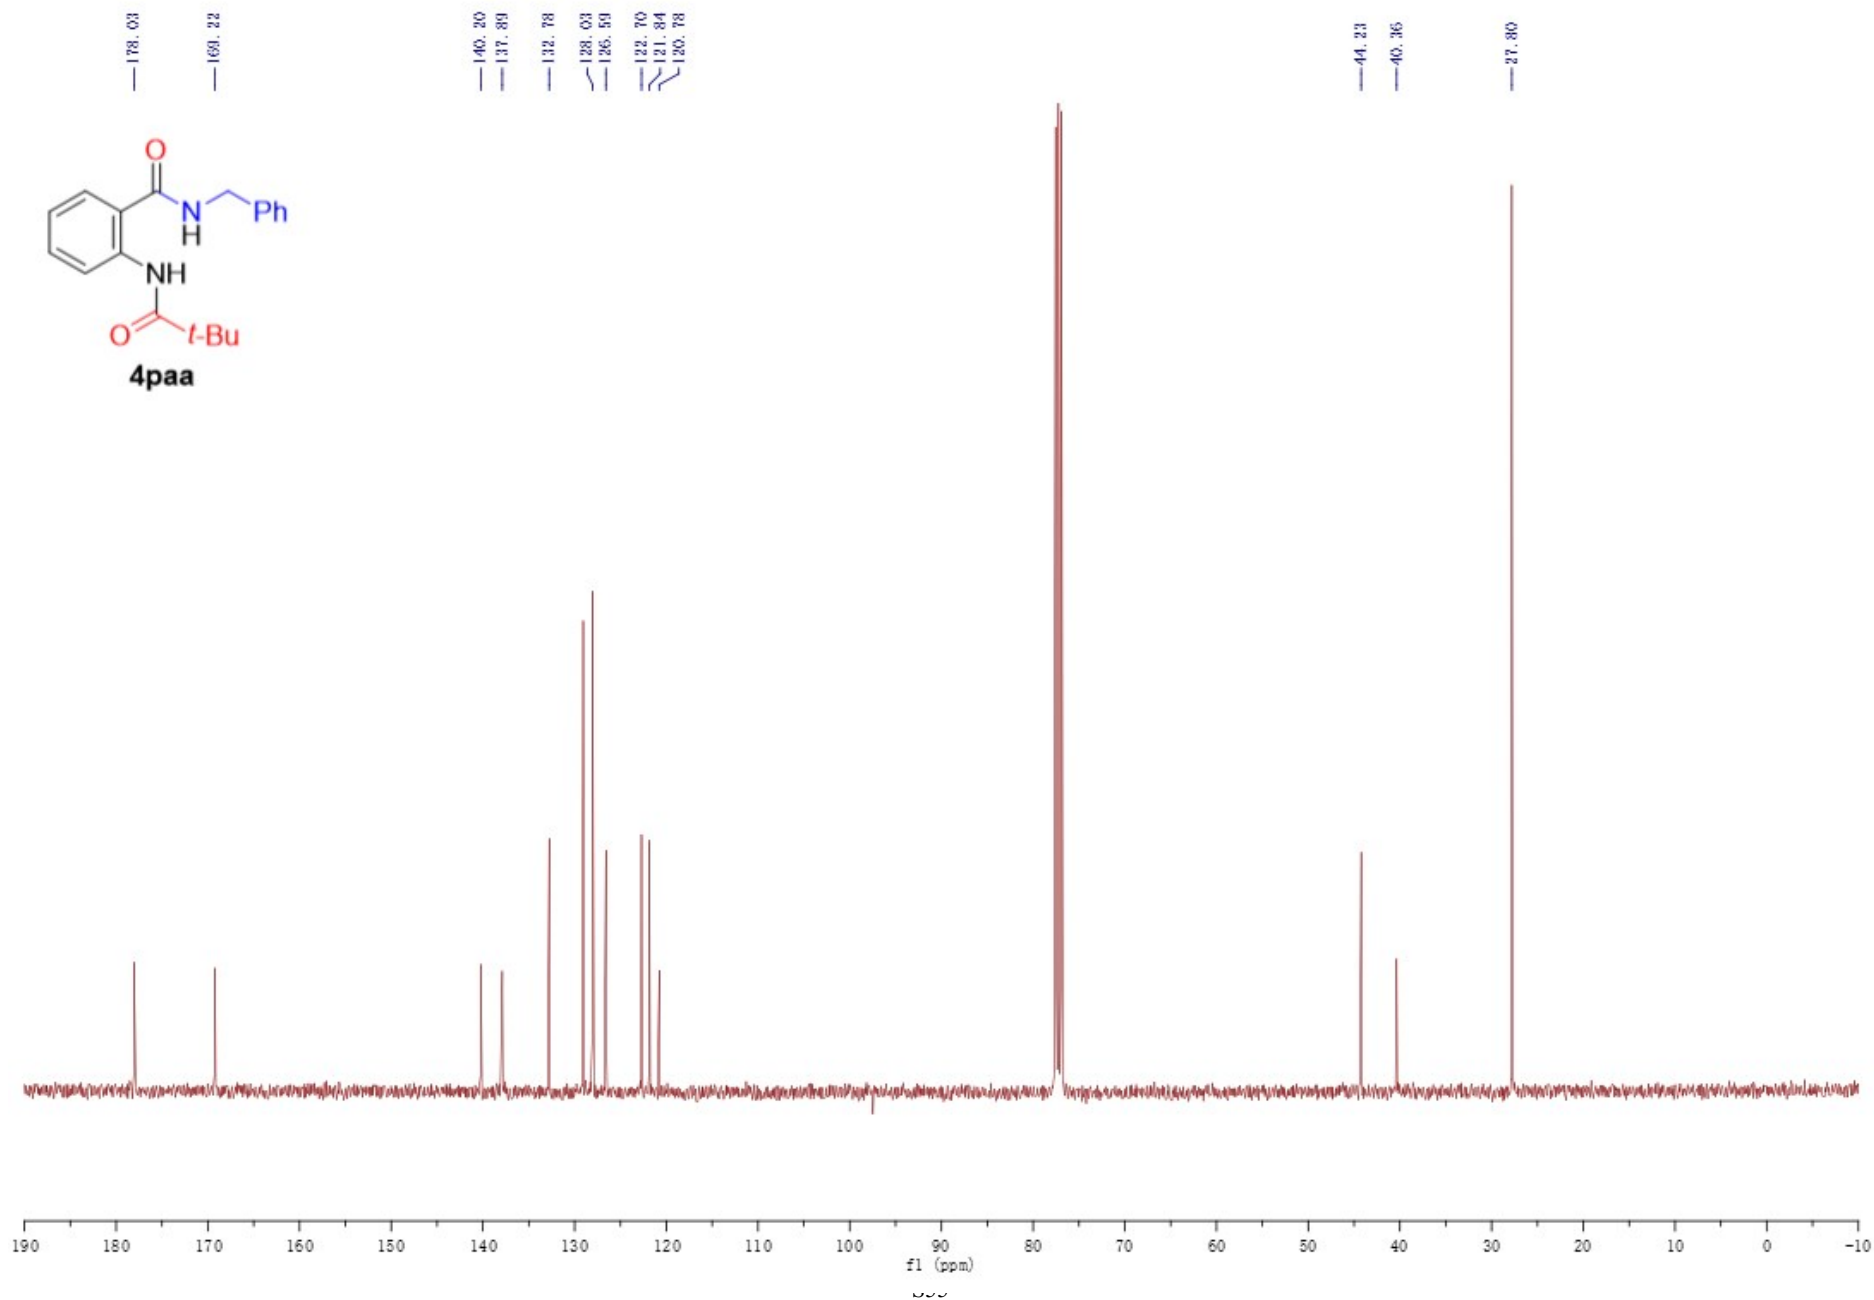

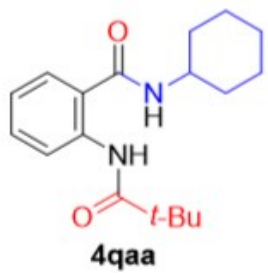

8.60  
8.58

7.41  
7.40  
7.39  
7.38  
7.24  
7.03  
7.03  
7.01  
6.99  
6.99

3.97  
3.96  
3.94  
3.93  
3.92  
3.91  
3.89  
3.88  
3.85

2.02  
2.01  
1.99  
1.98  
1.72  
1.61  
1.41  
1.30  
1.28  
1.24  
1.22  
1.21  
1.18

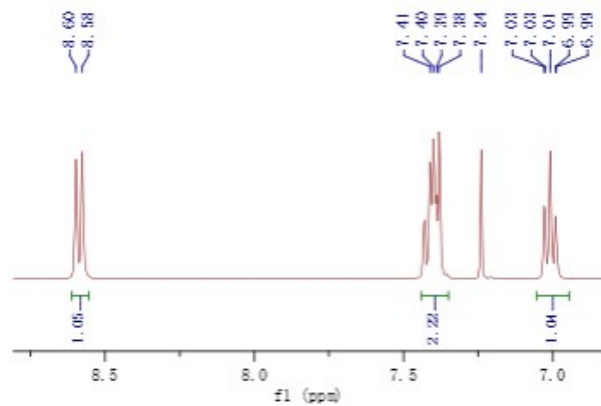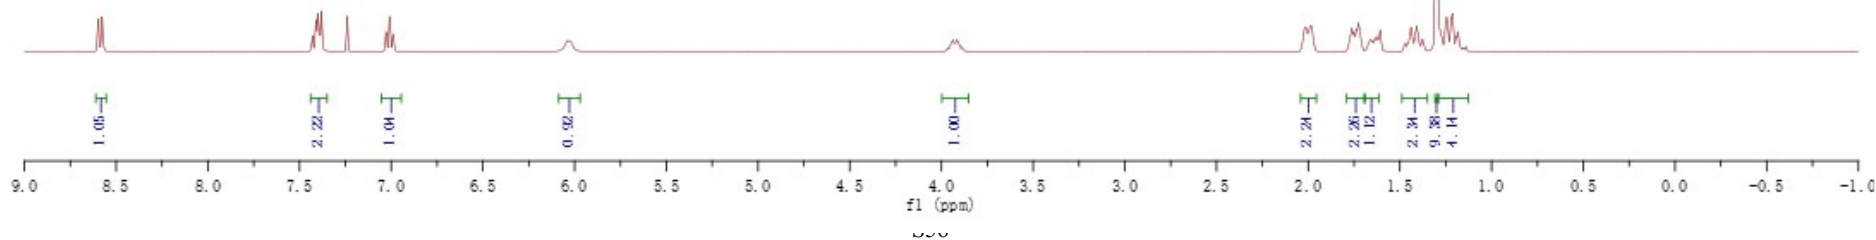



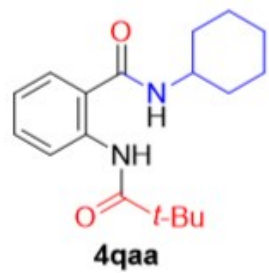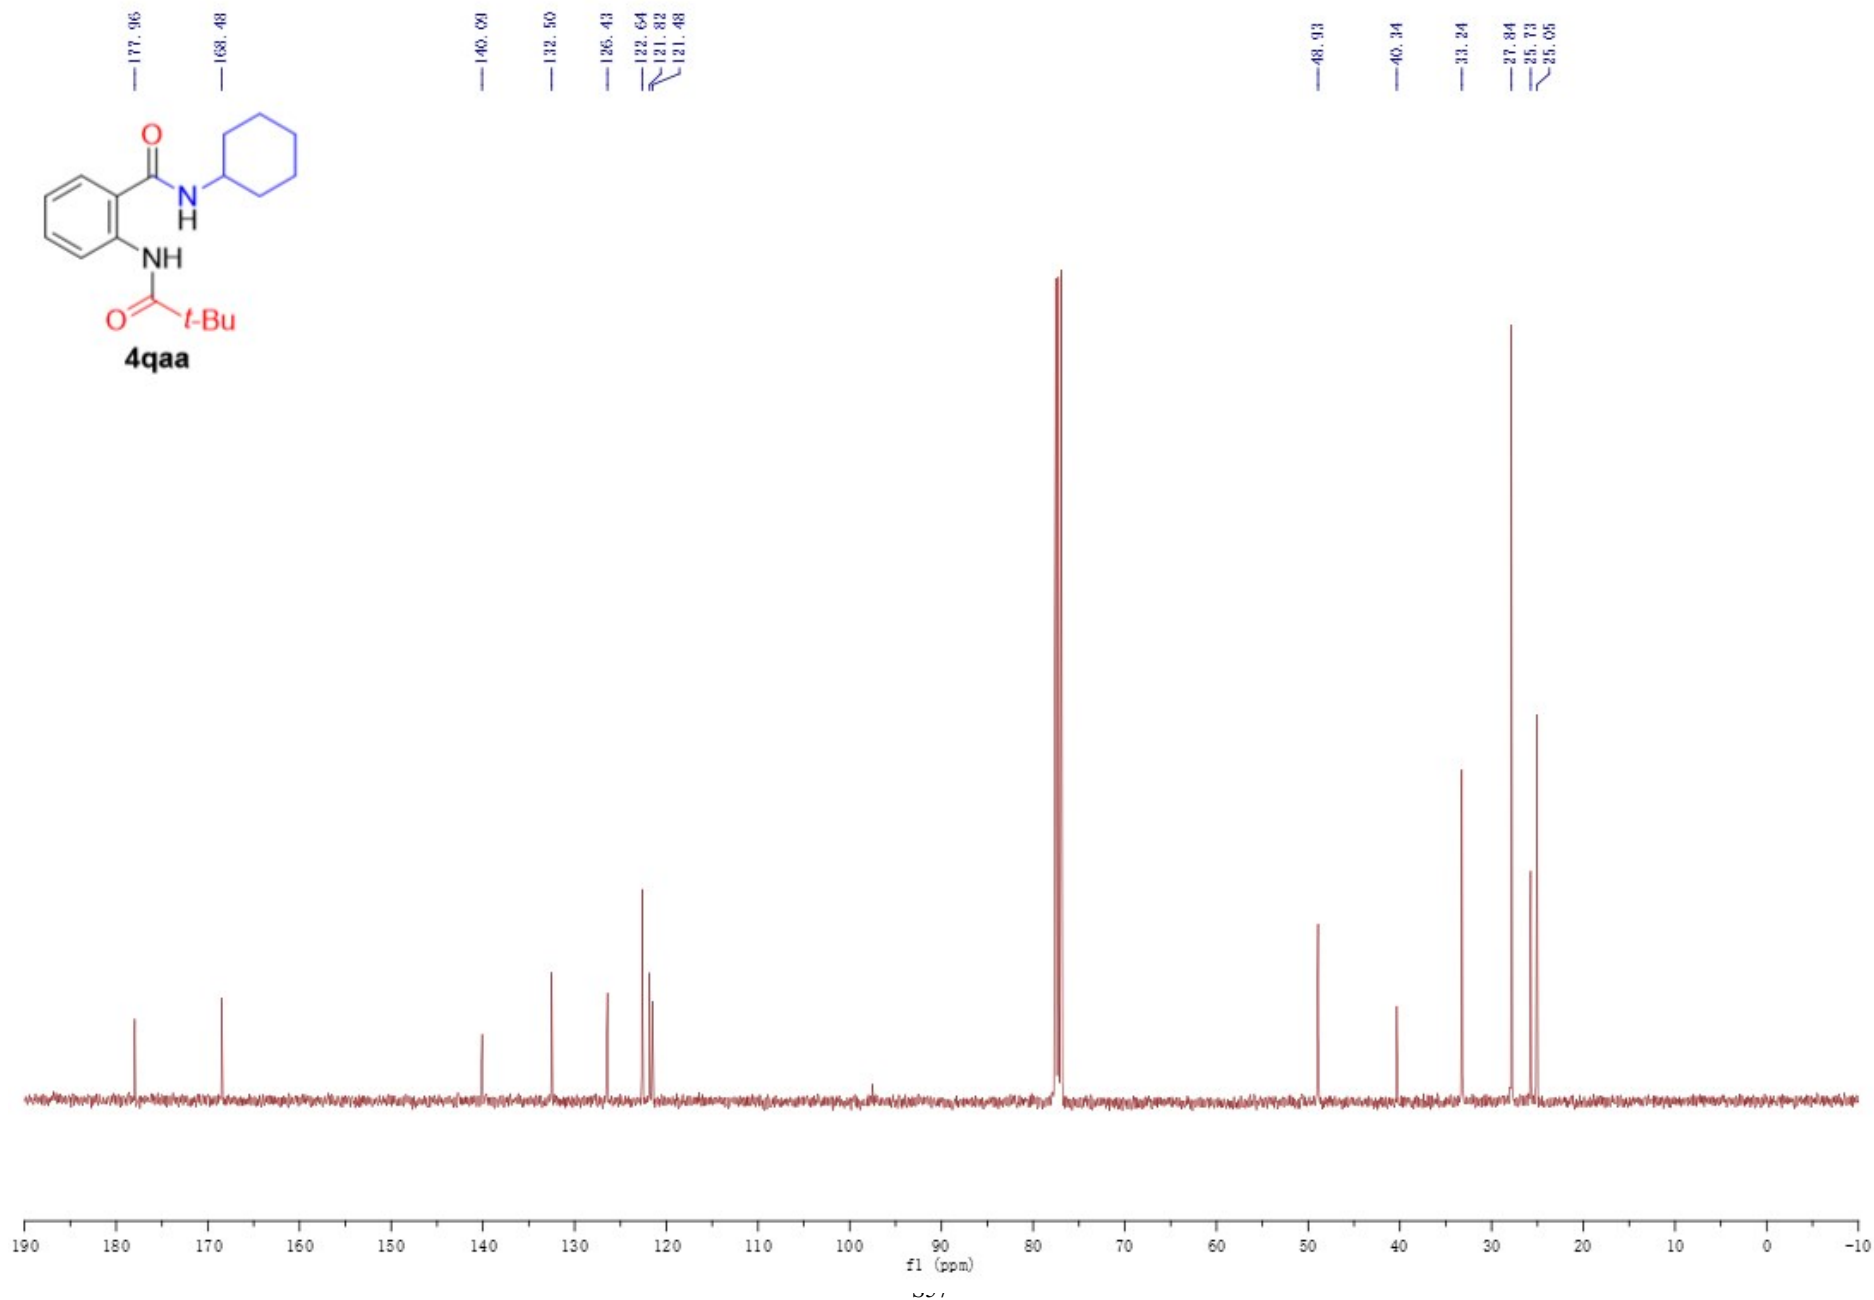

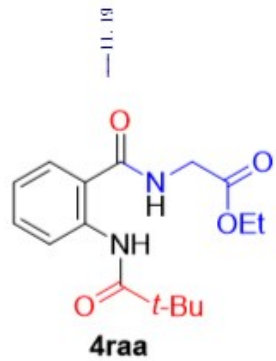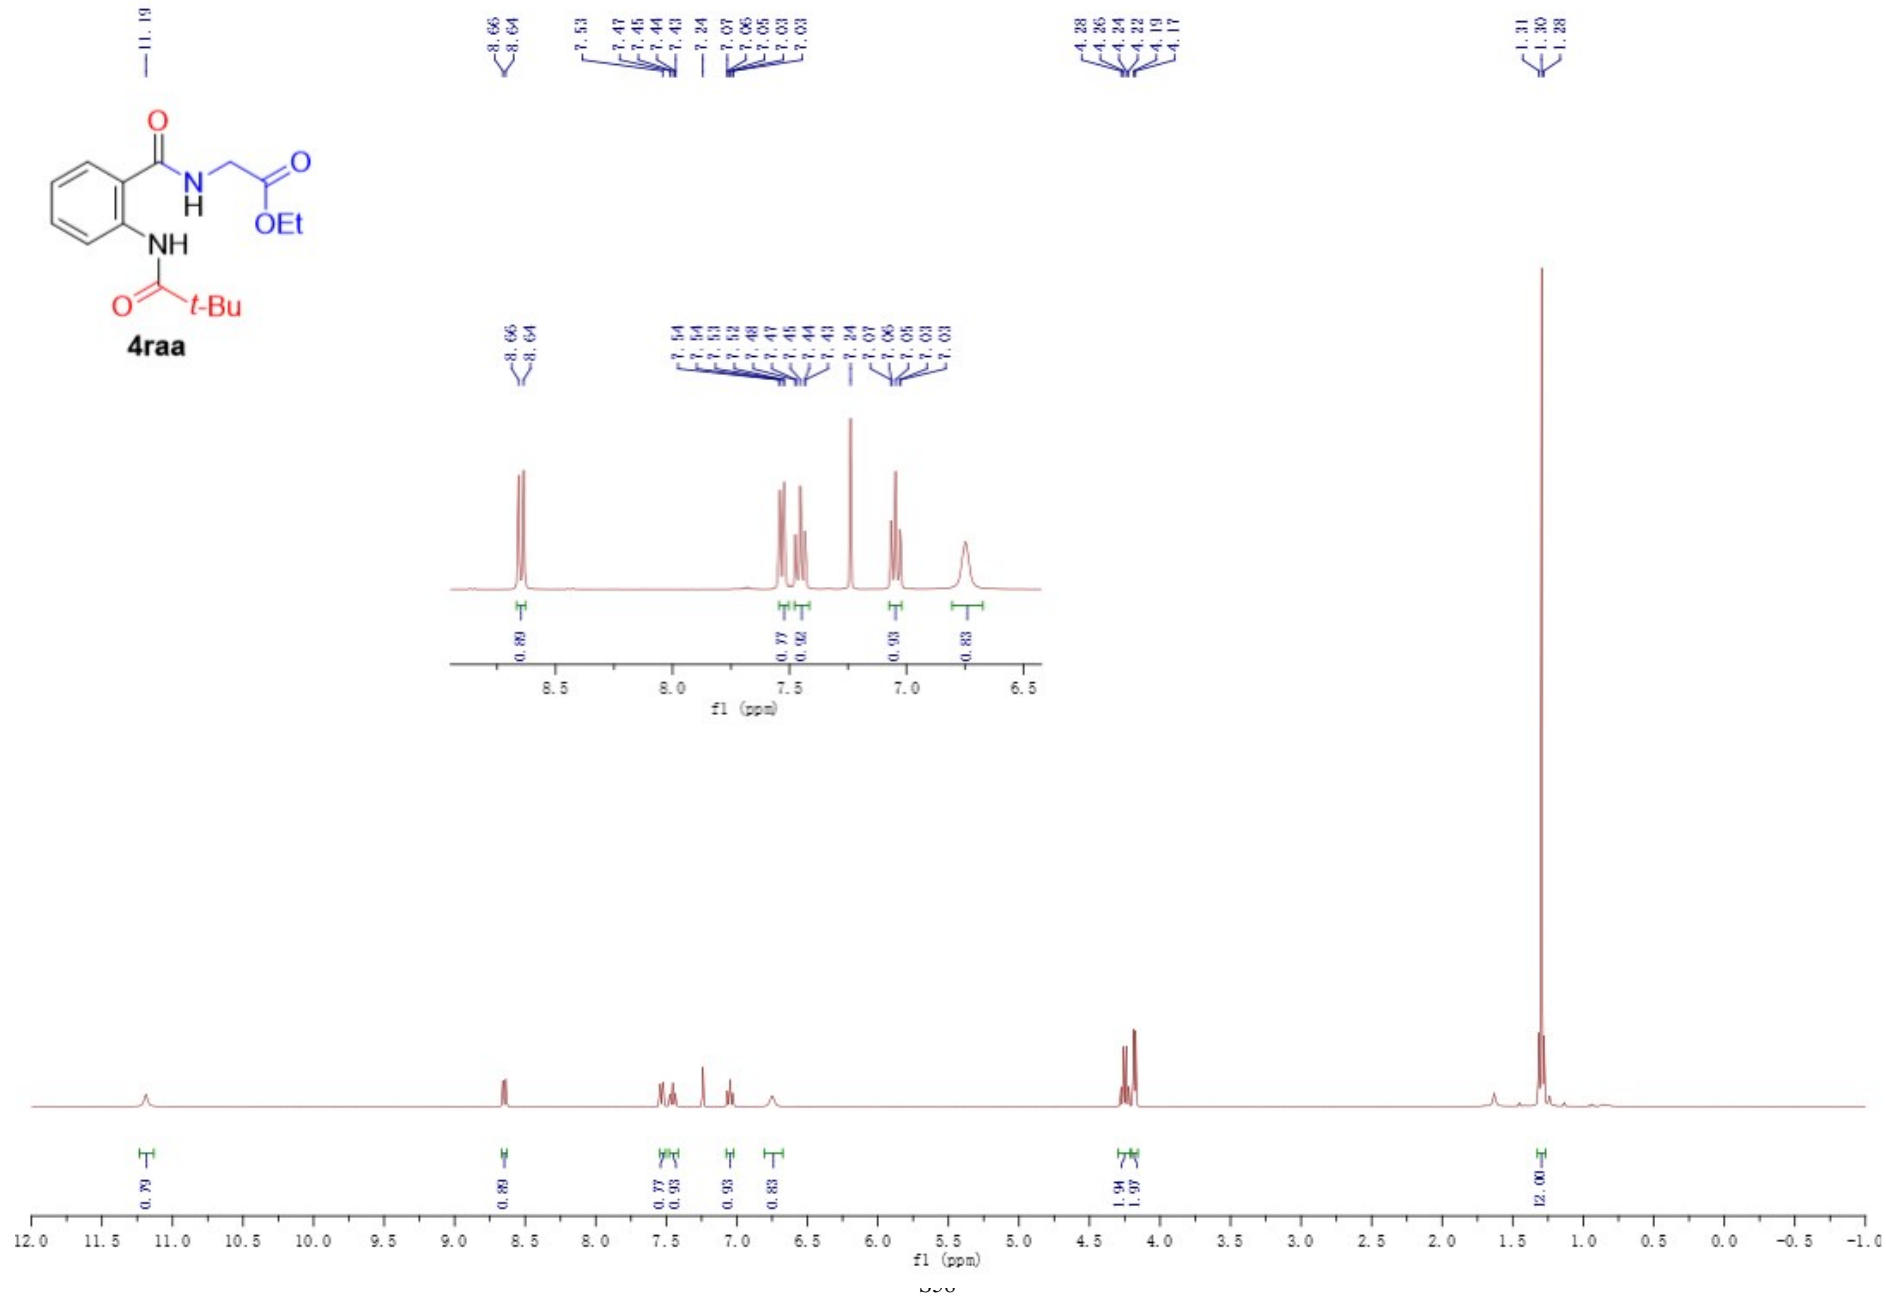

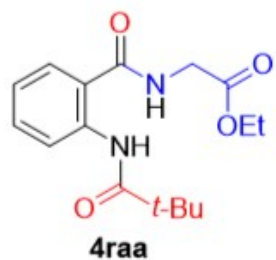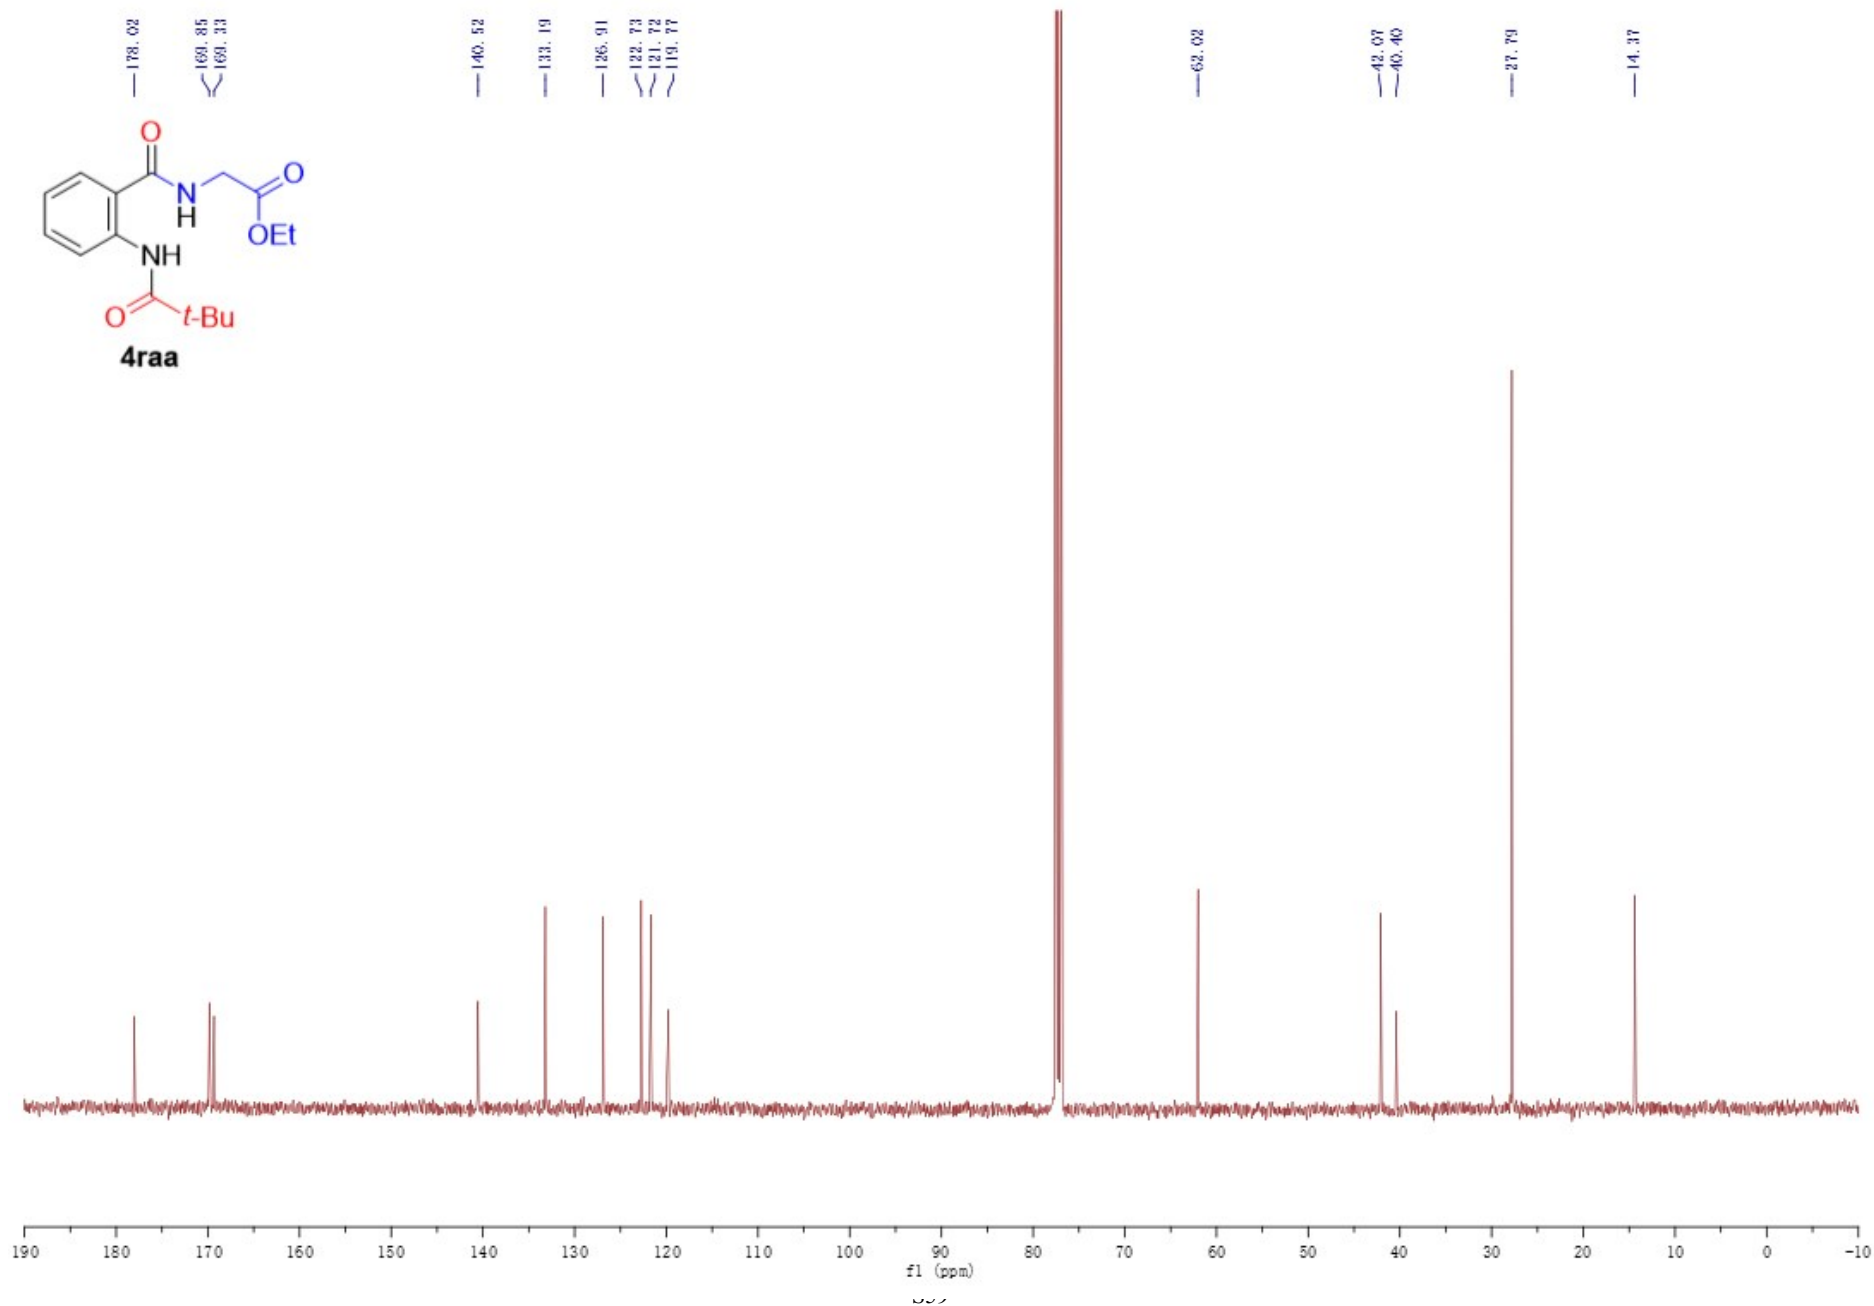

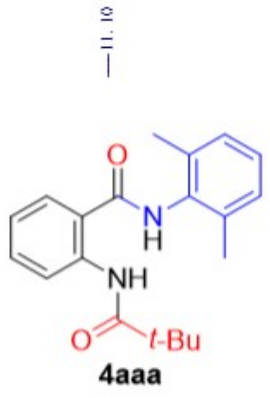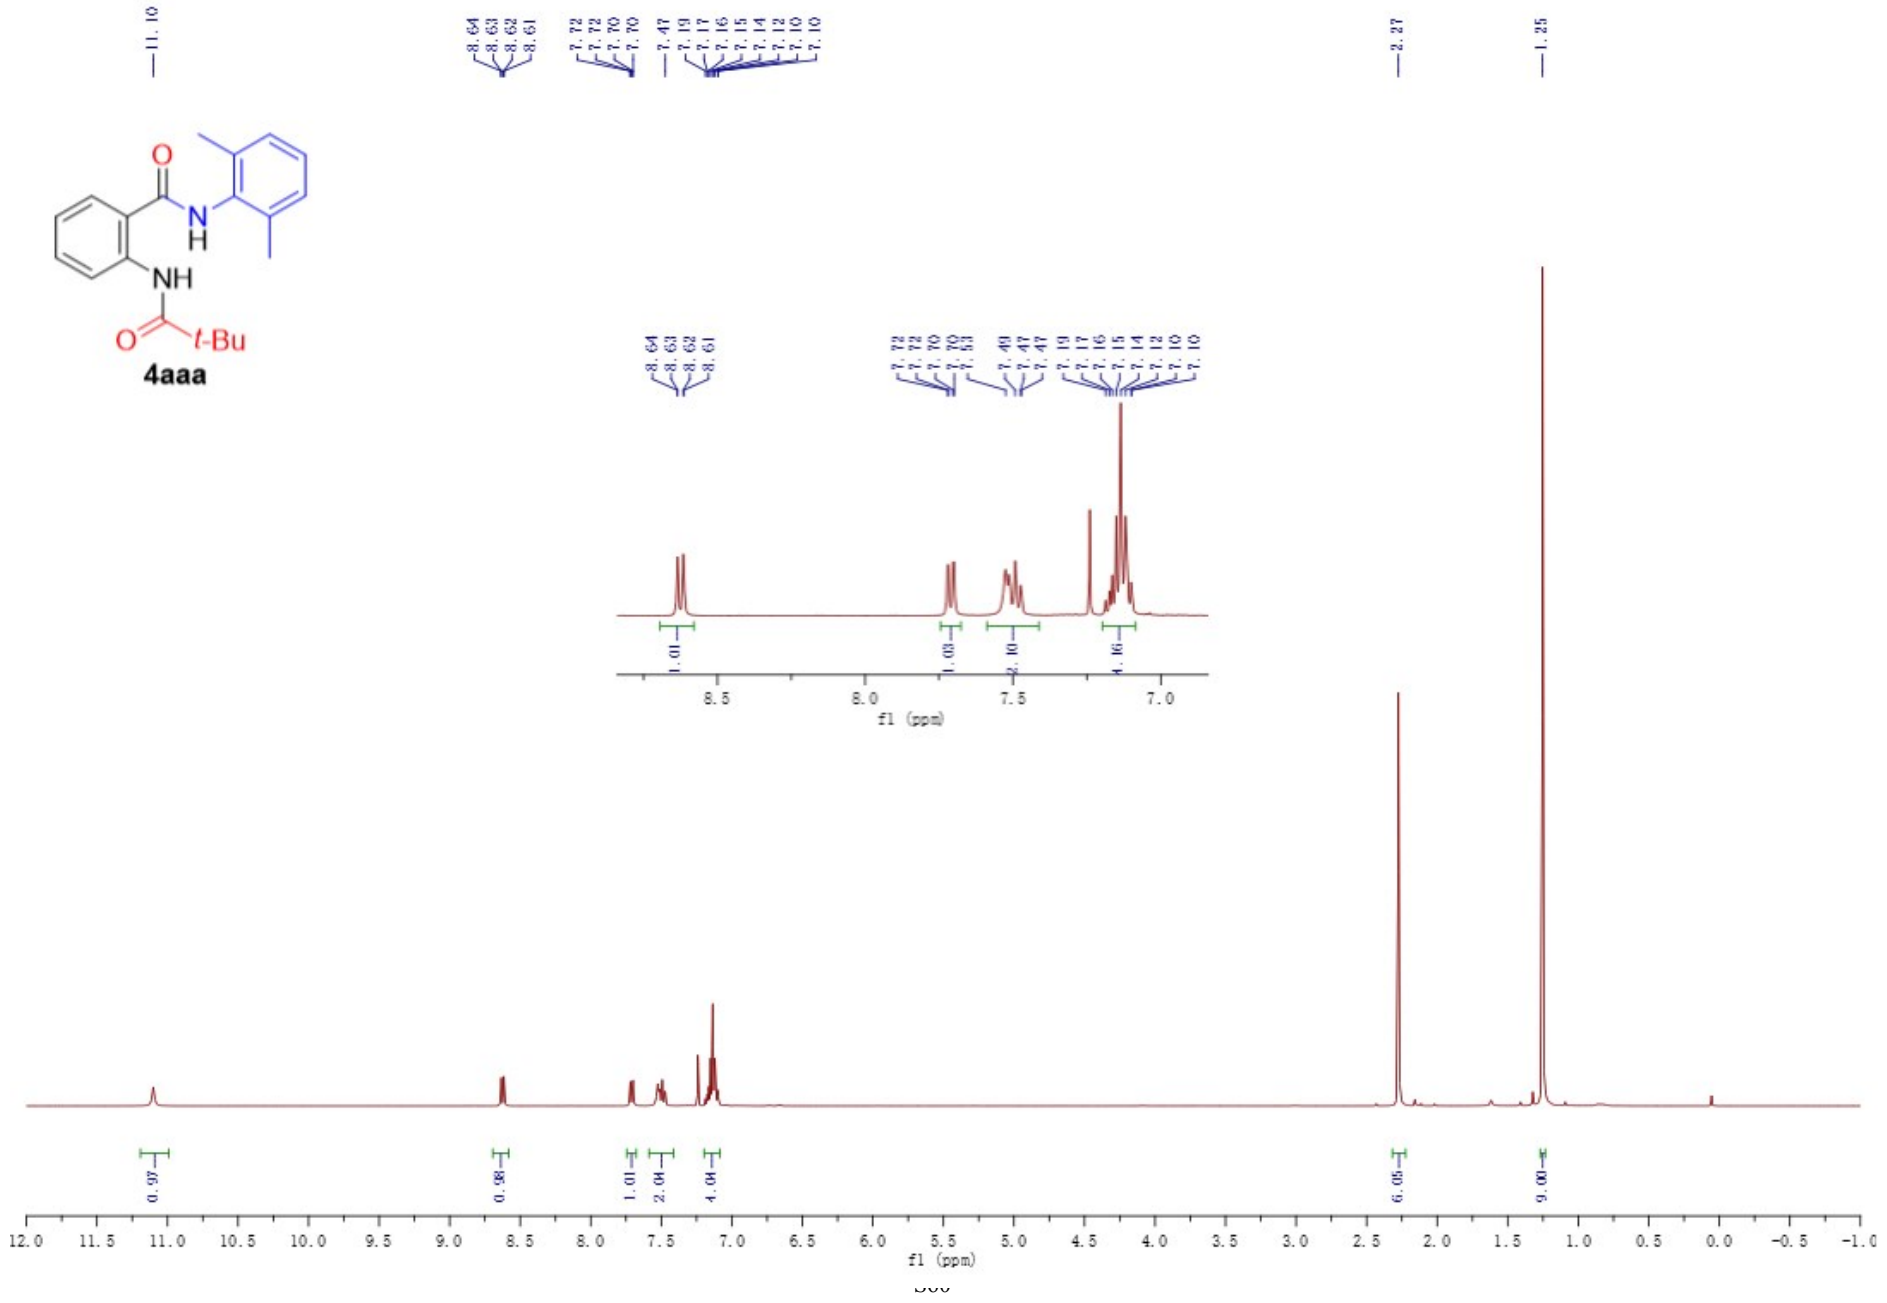

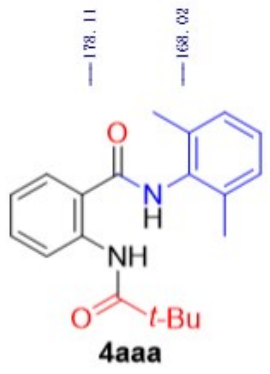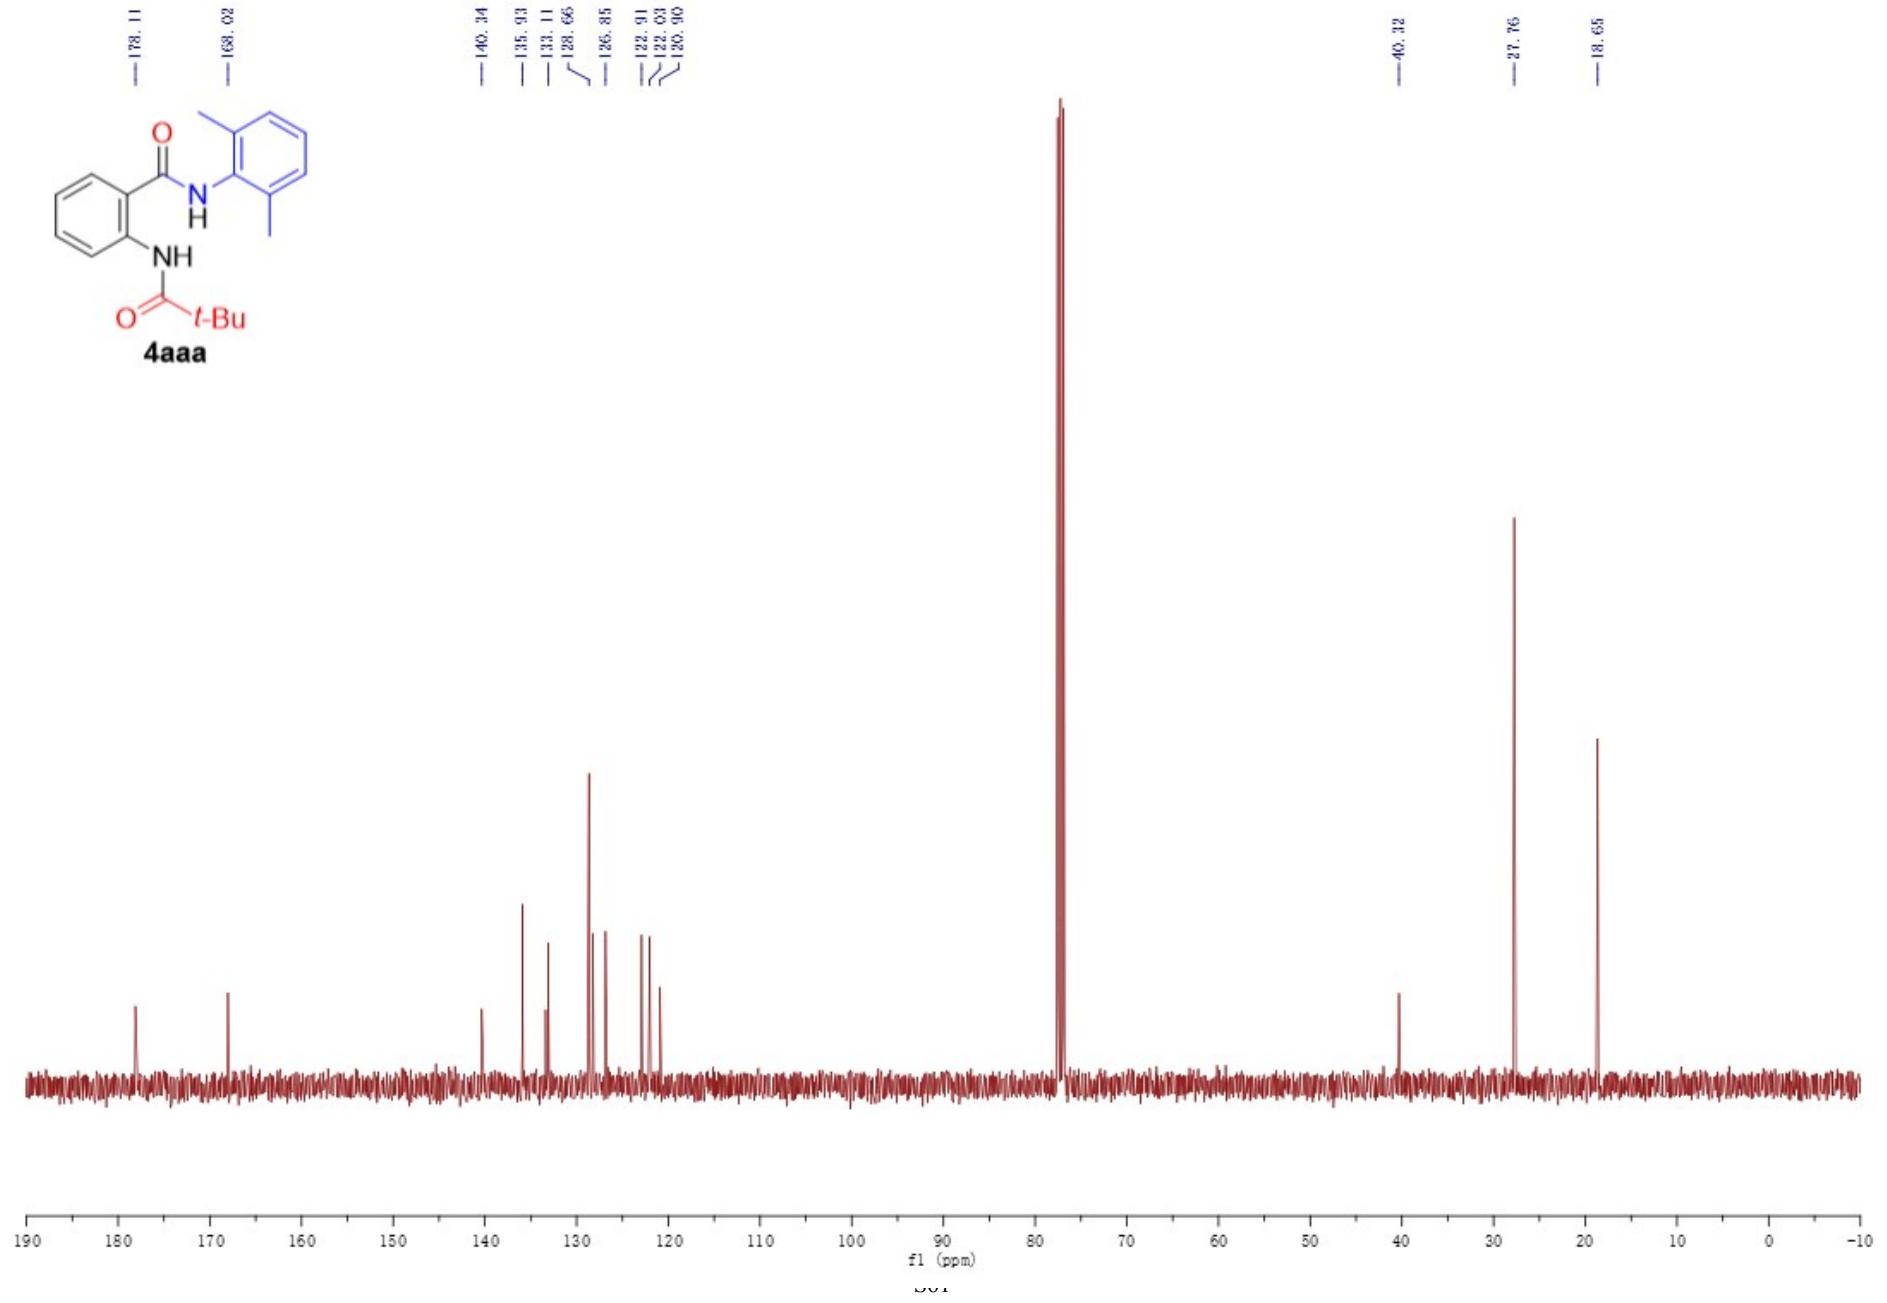

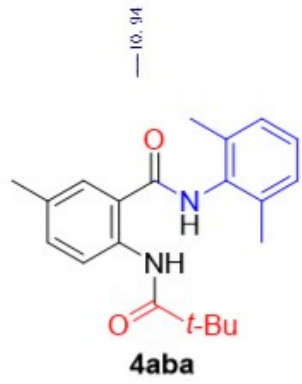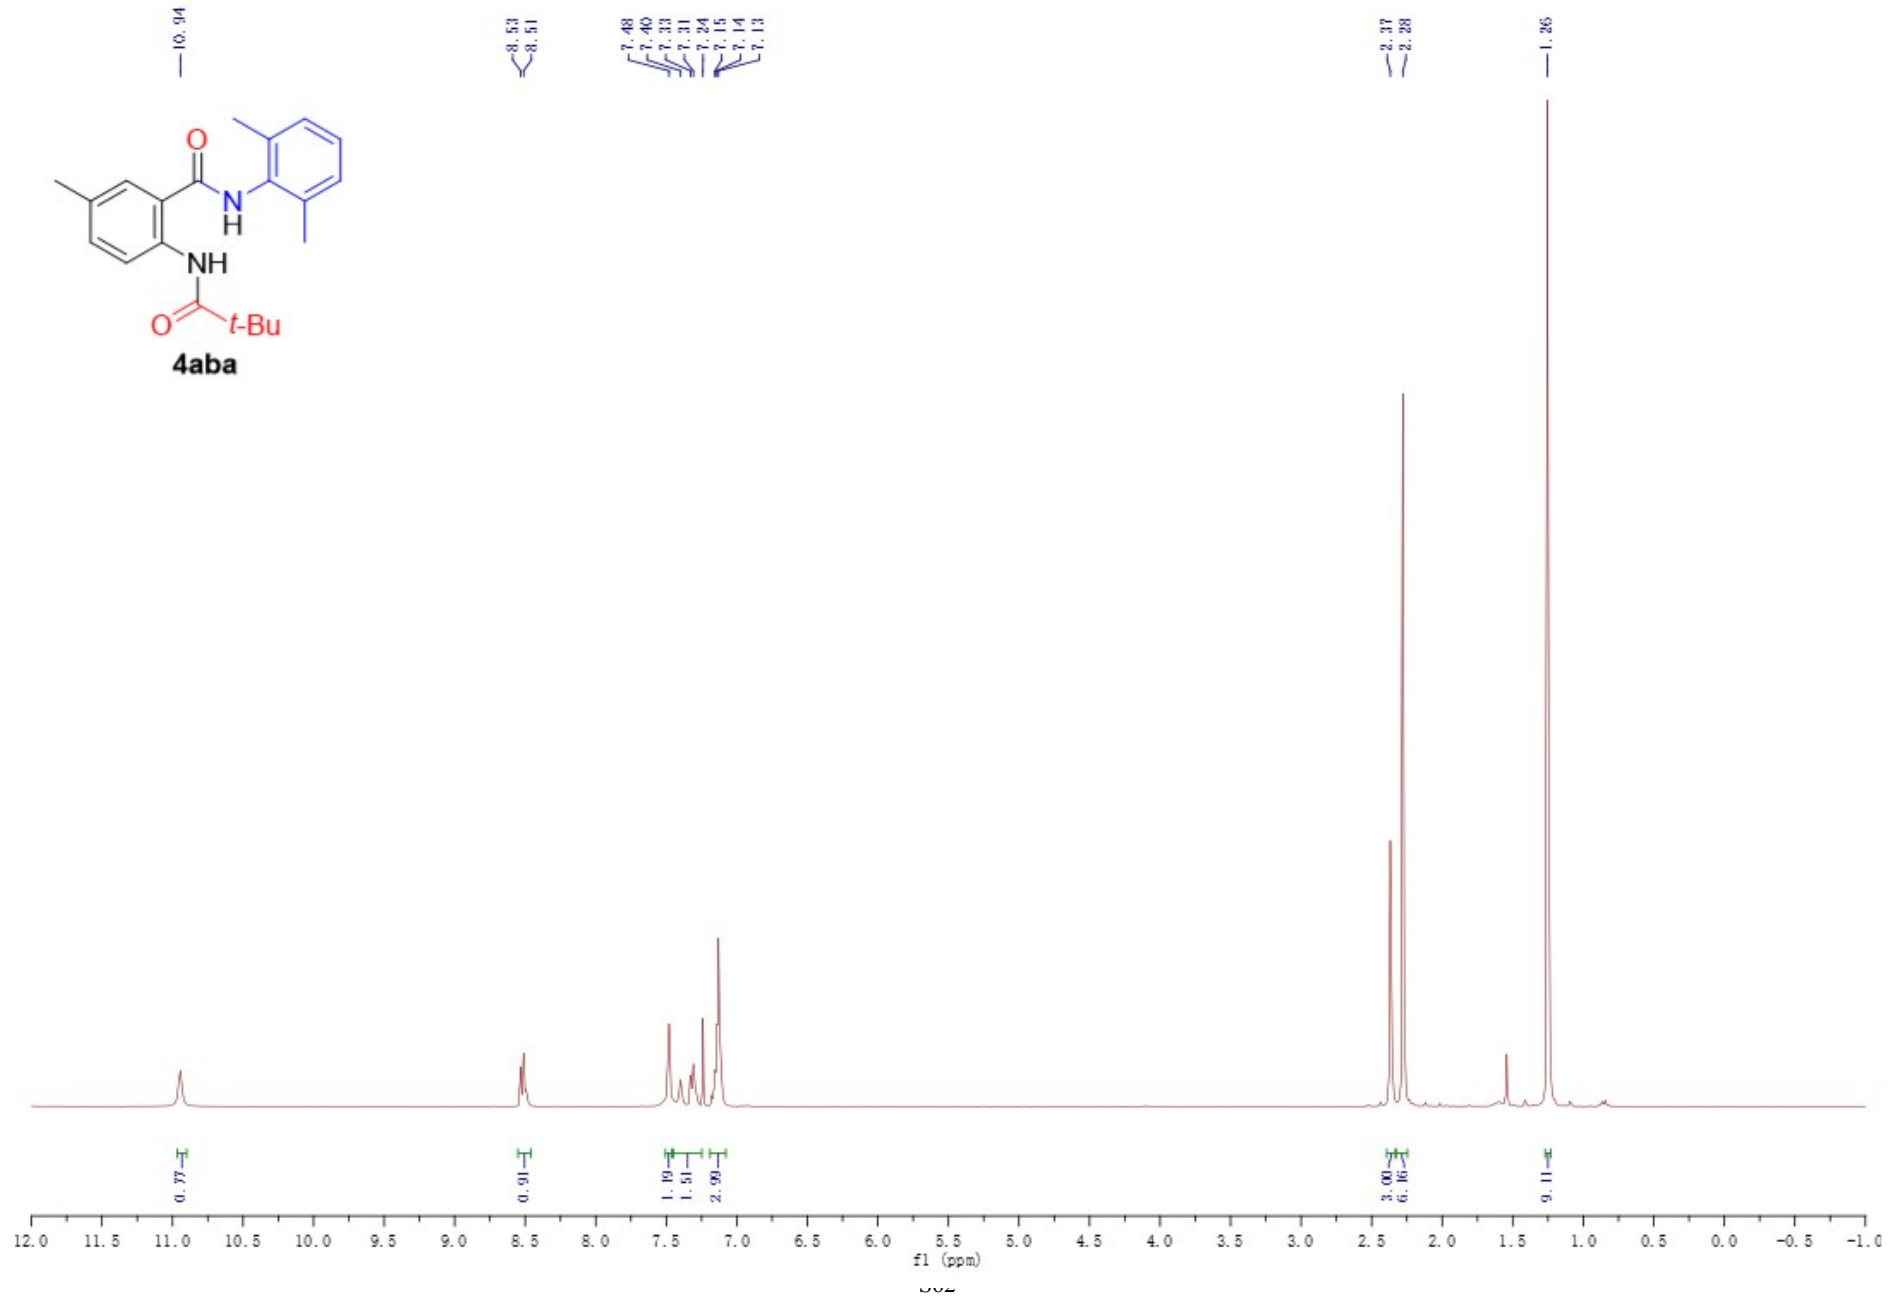

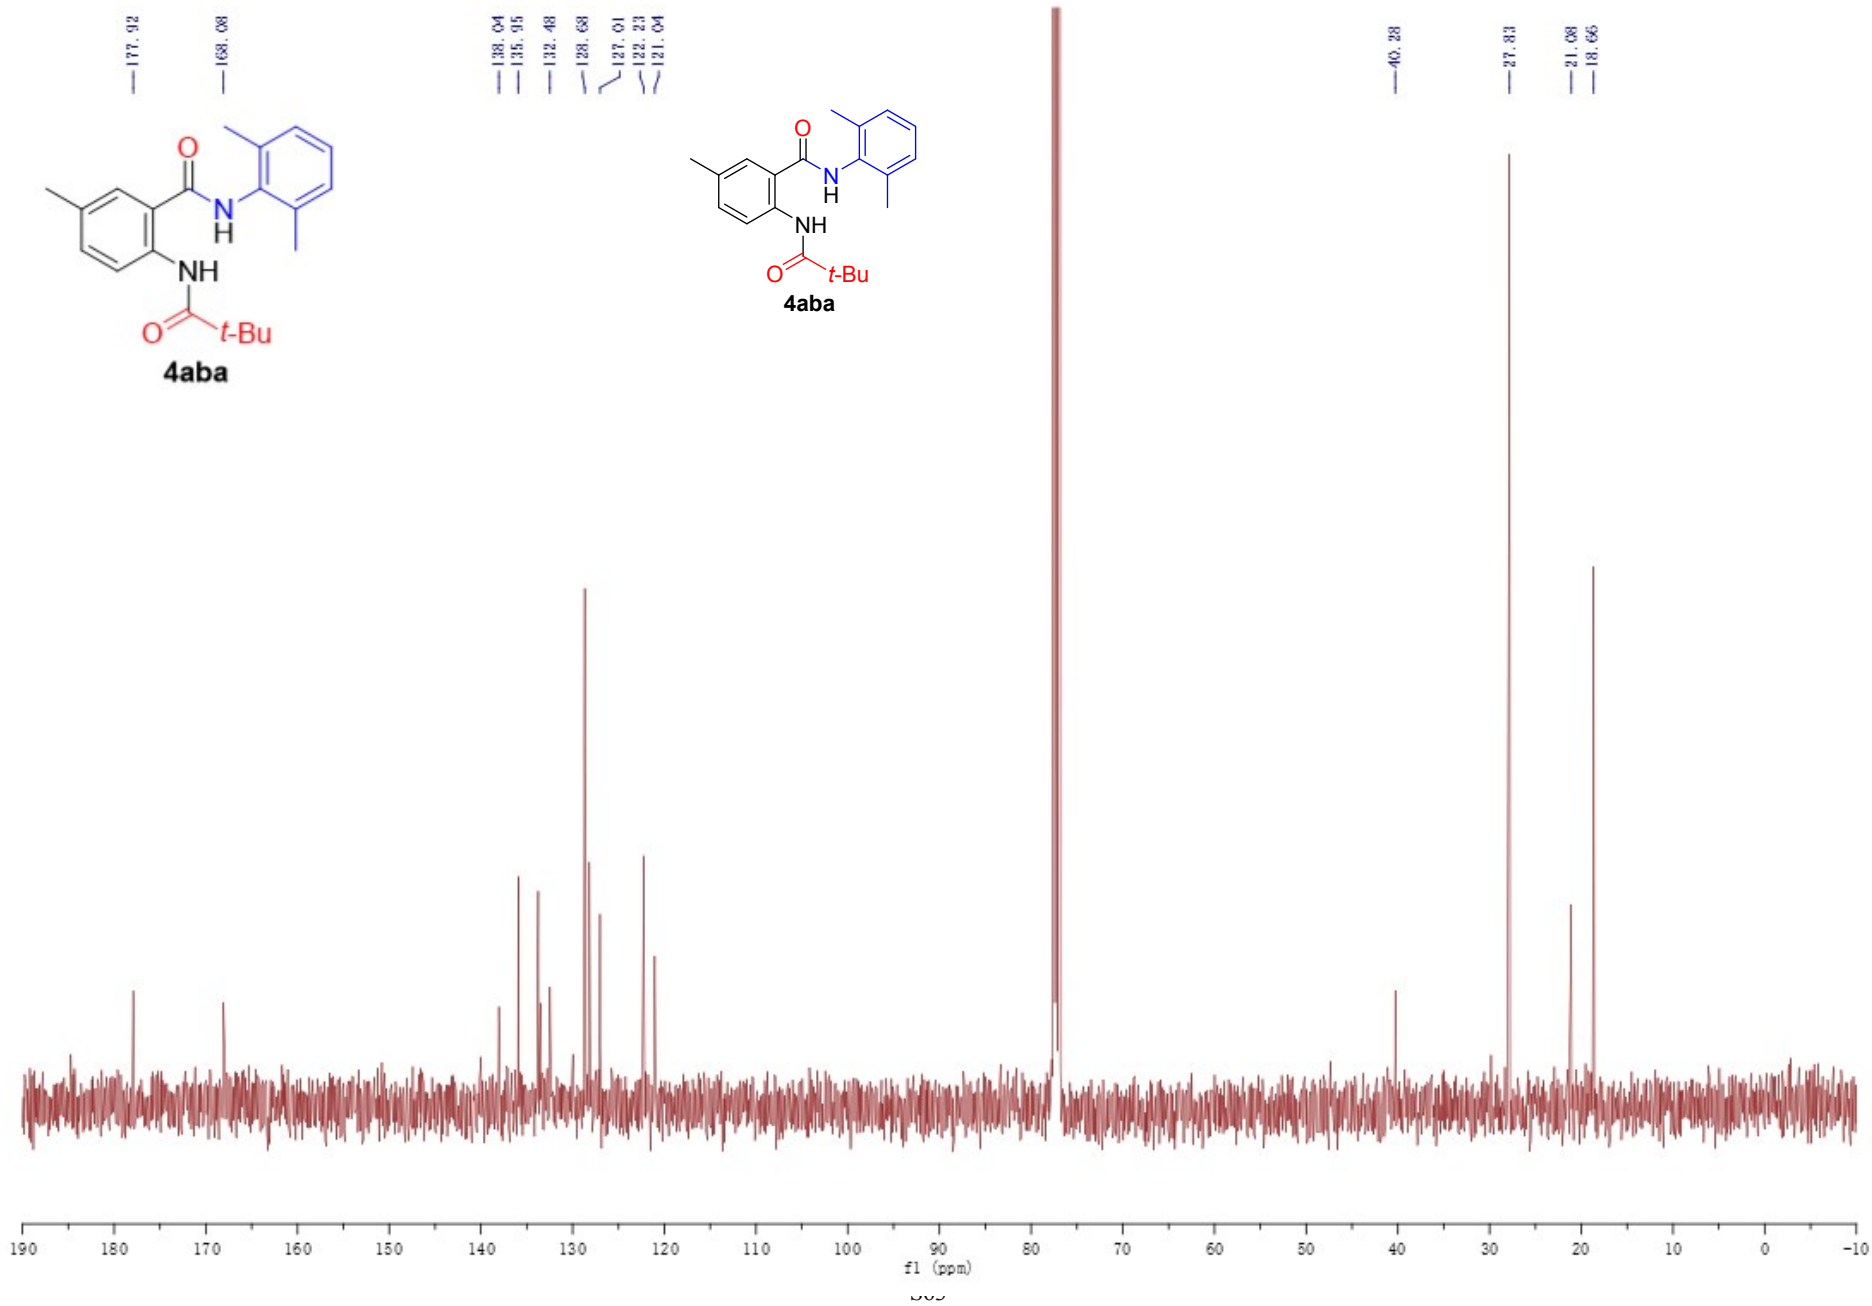

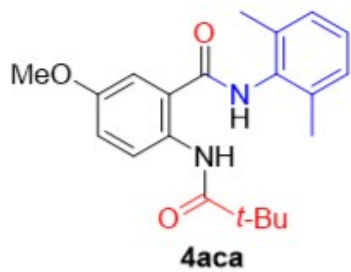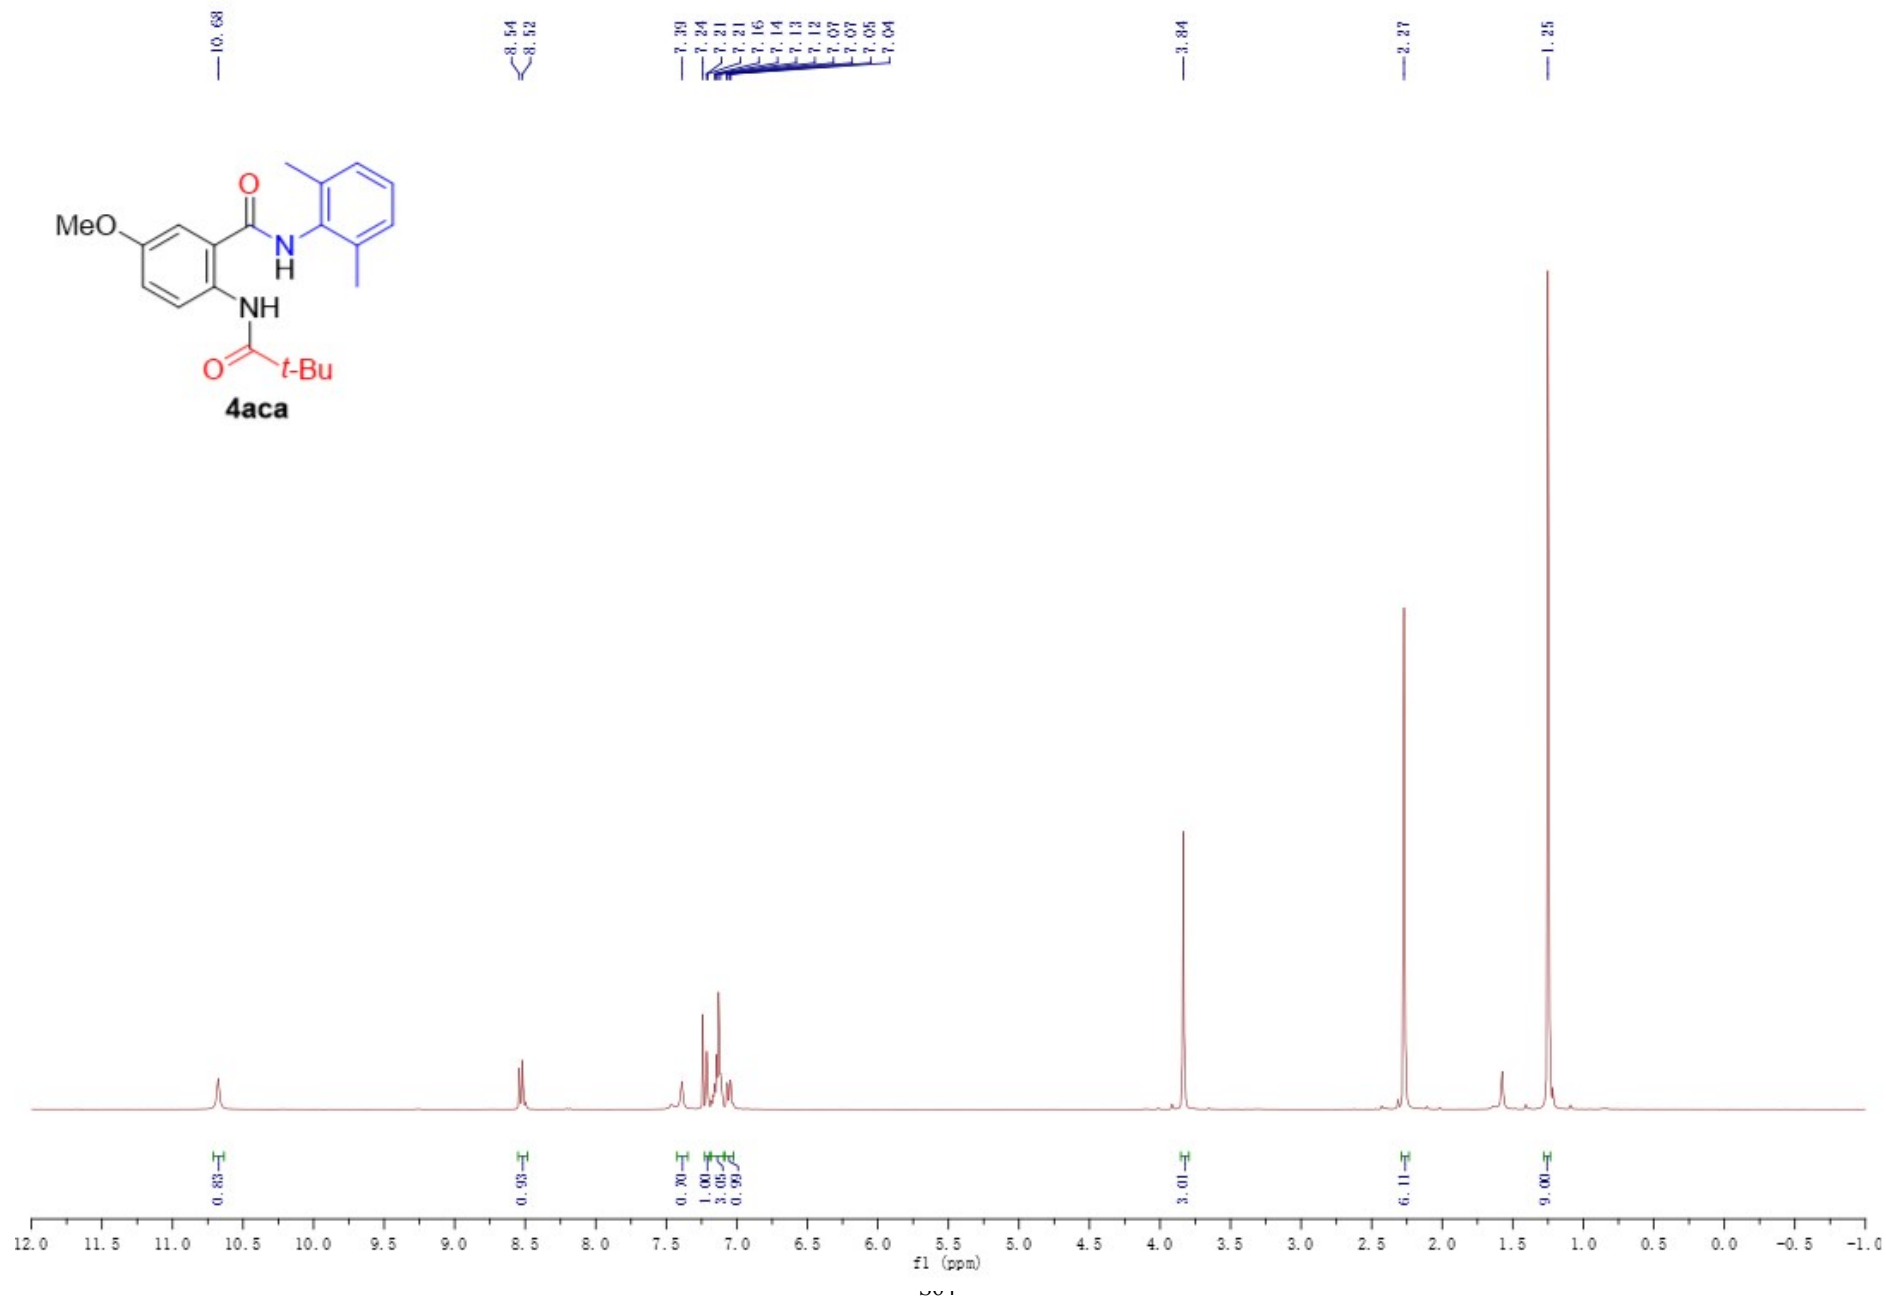



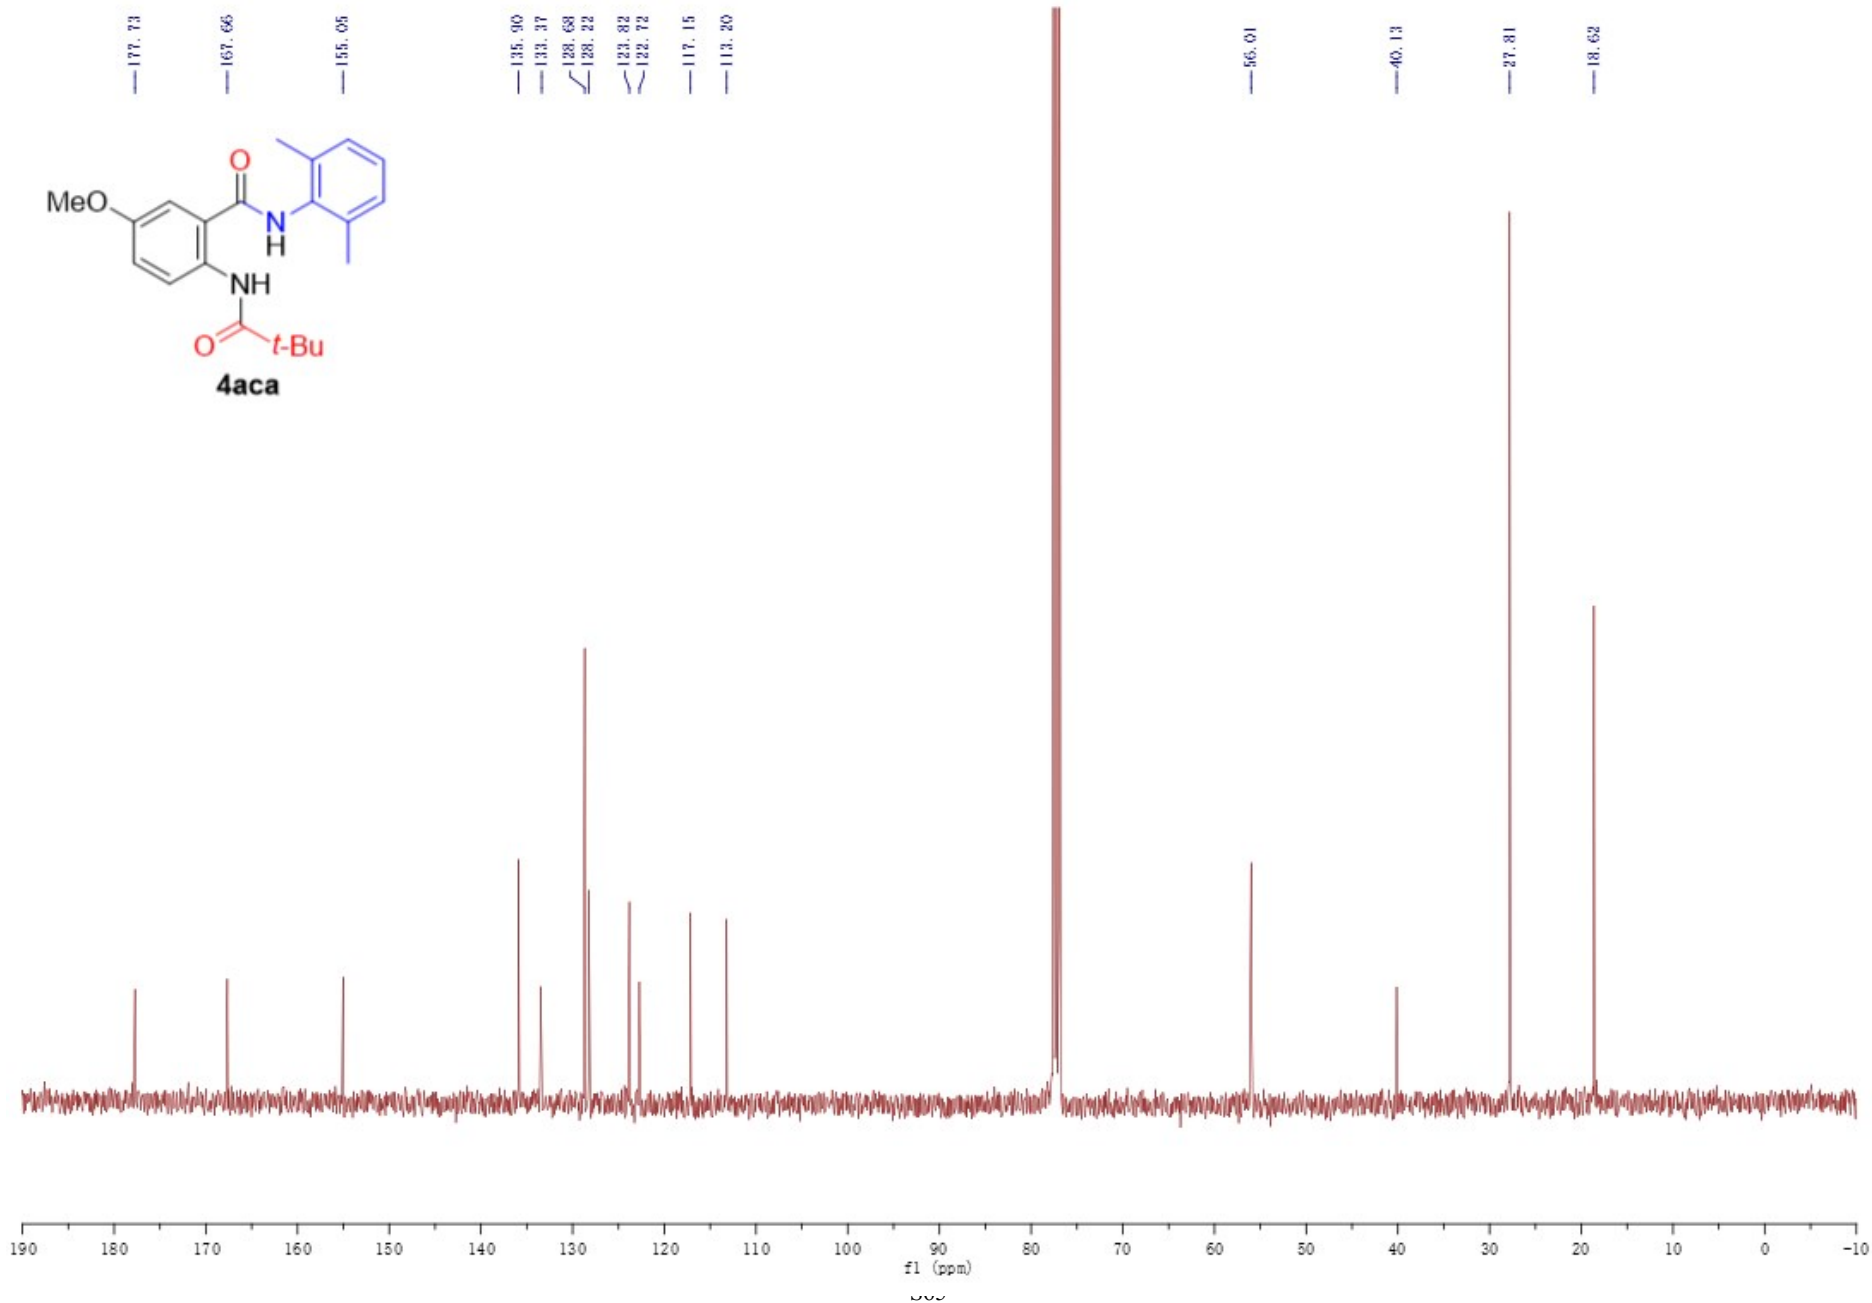

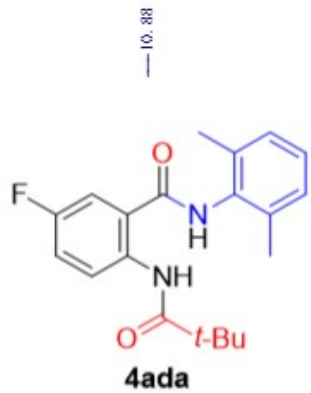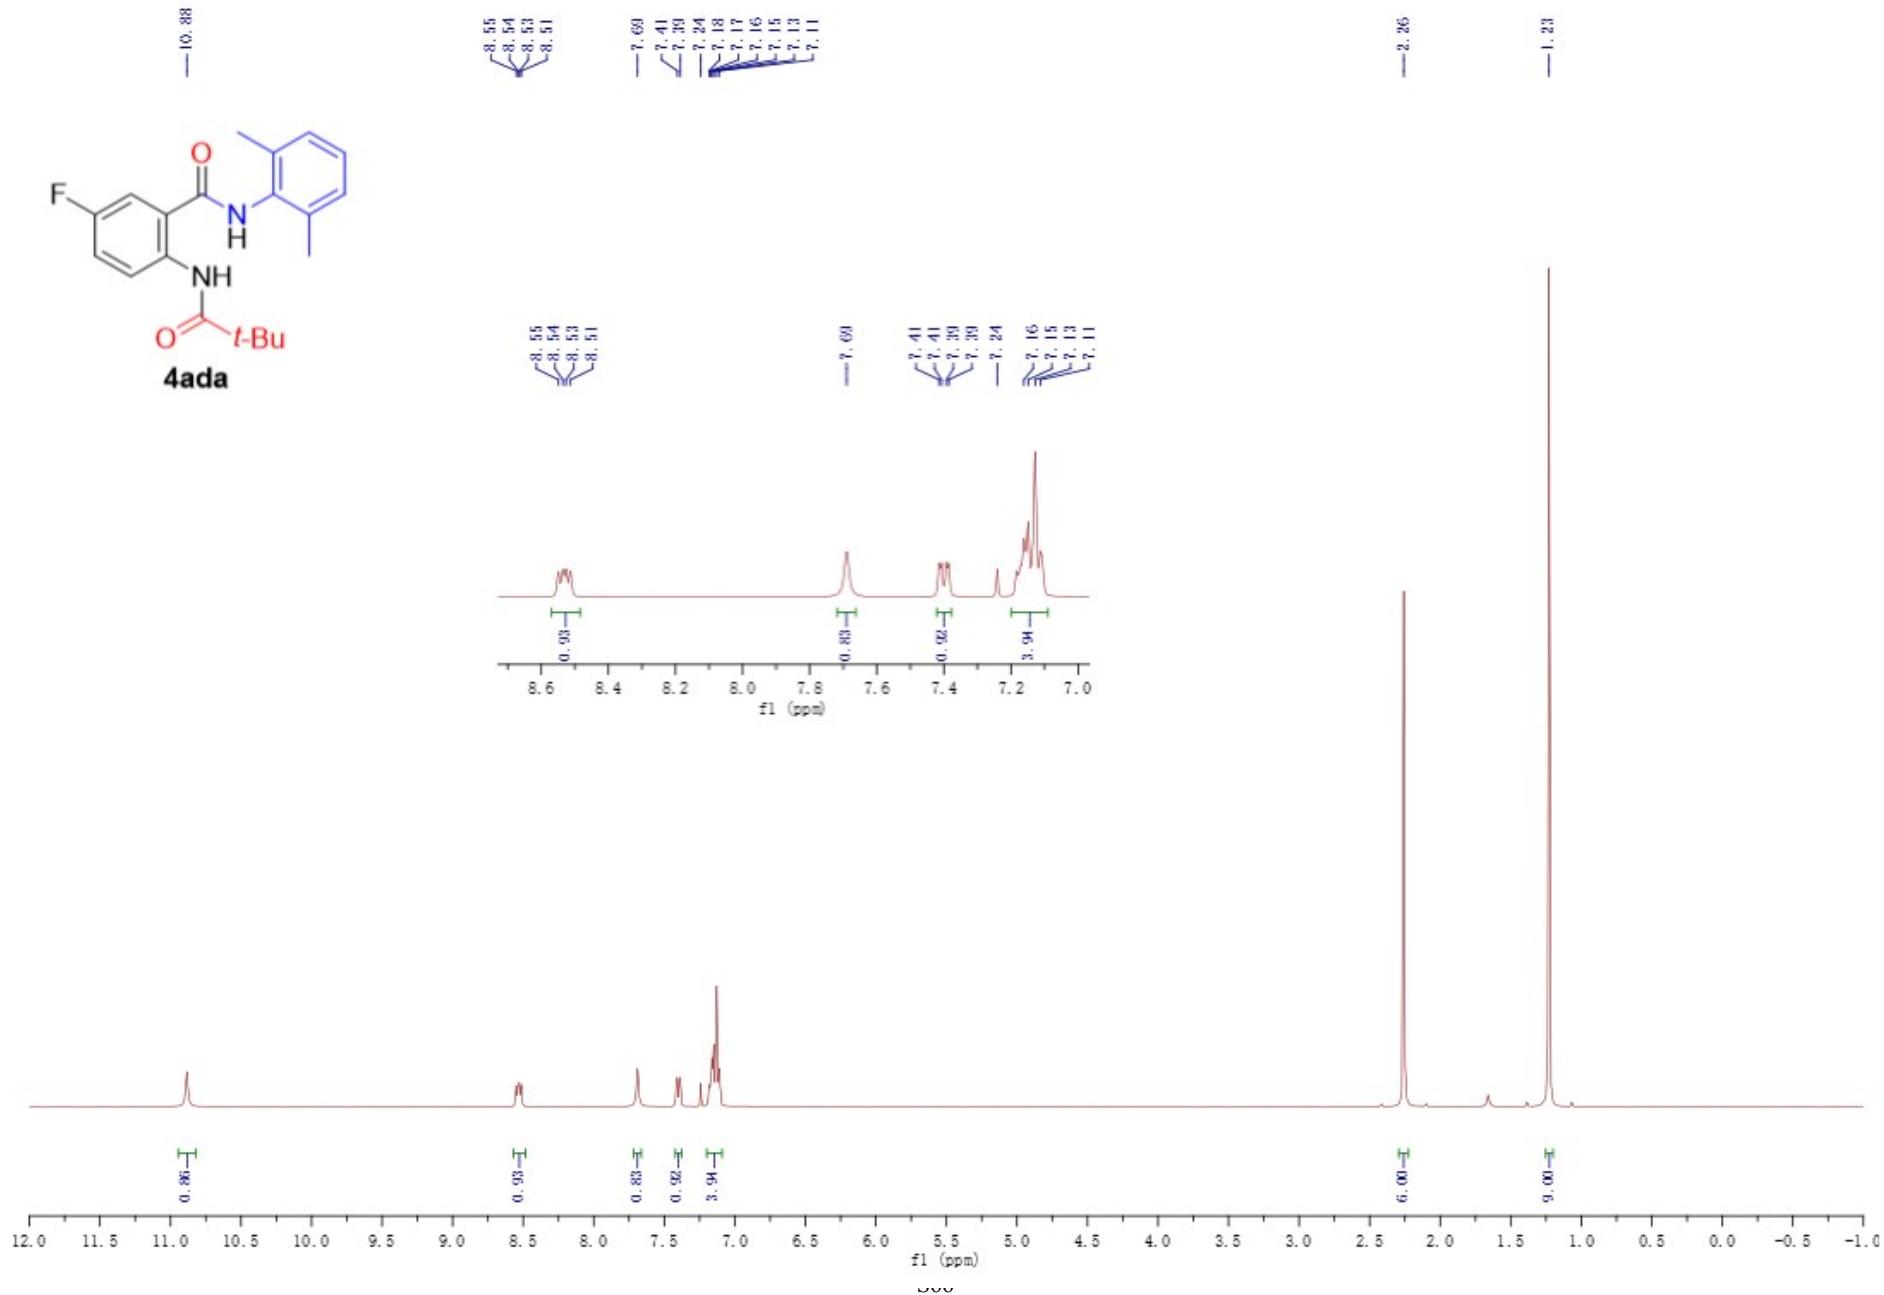

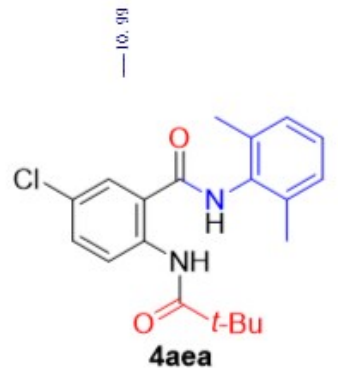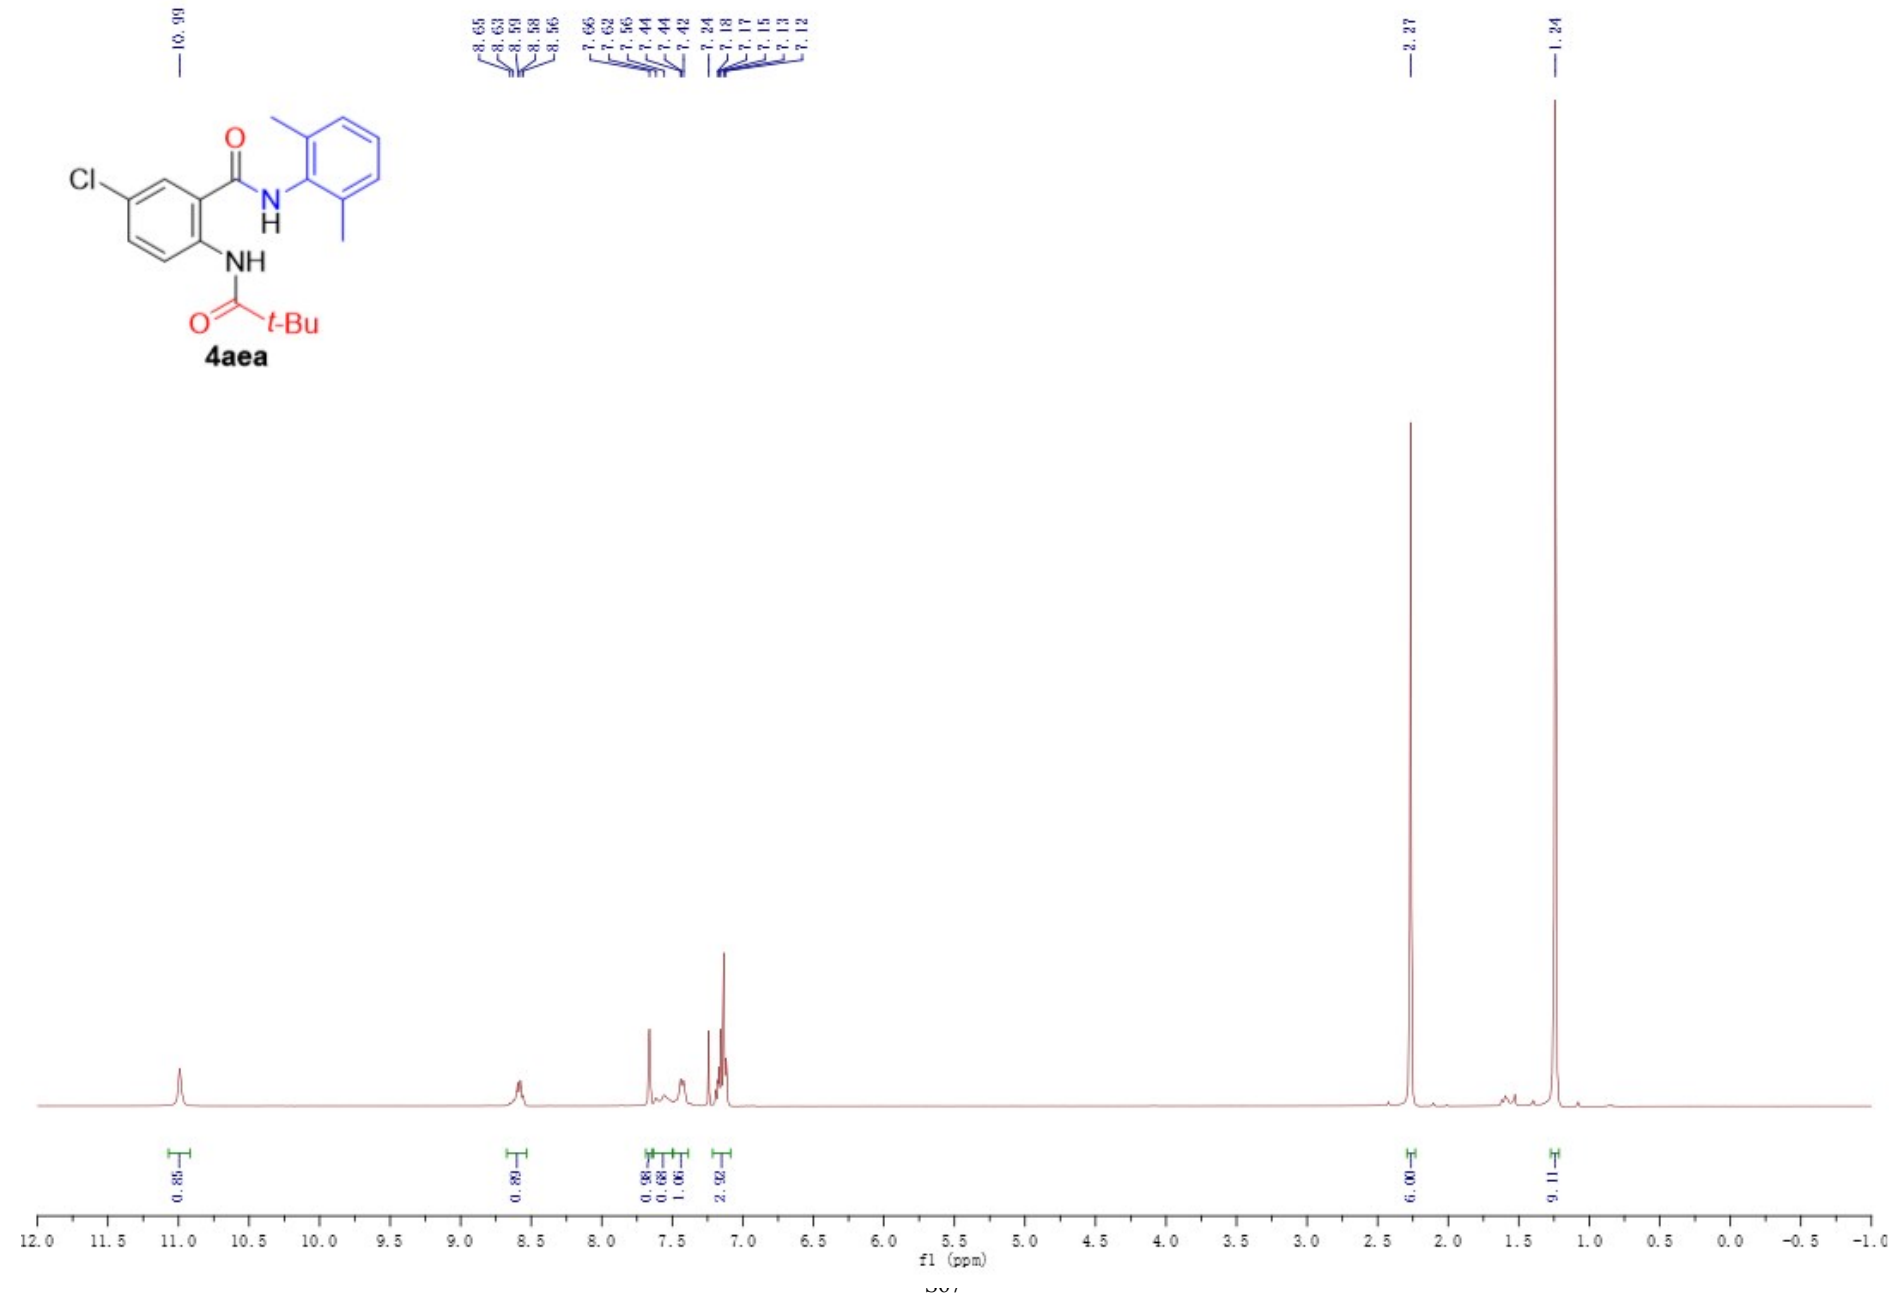

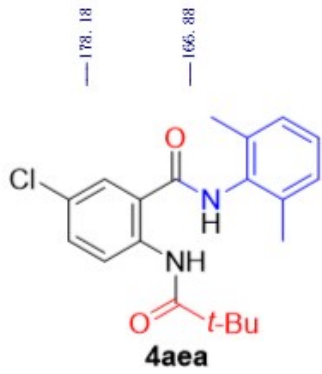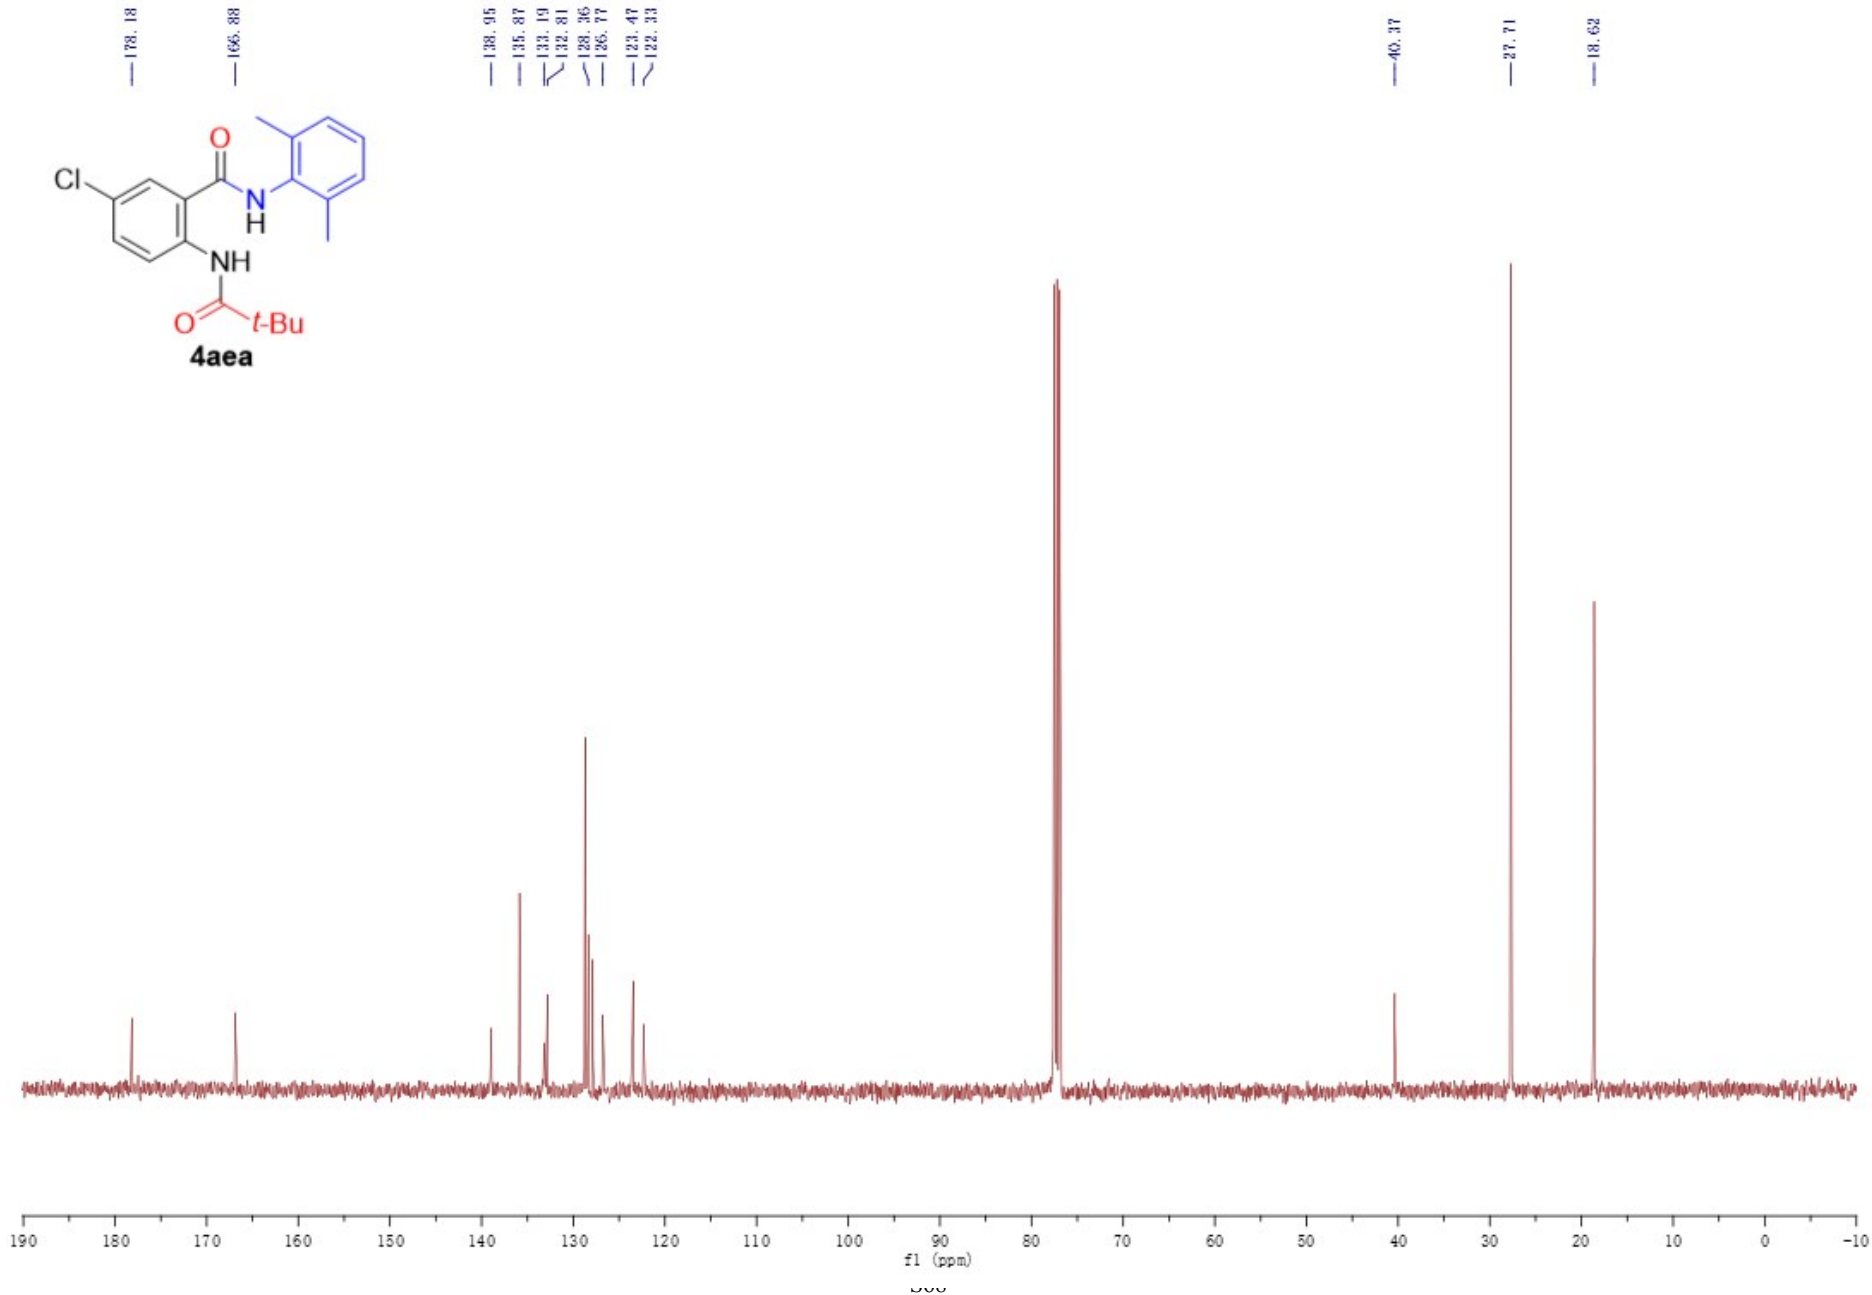

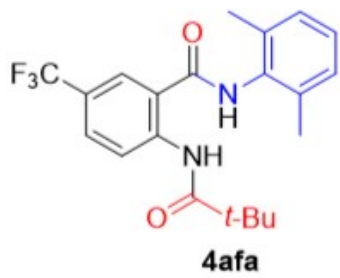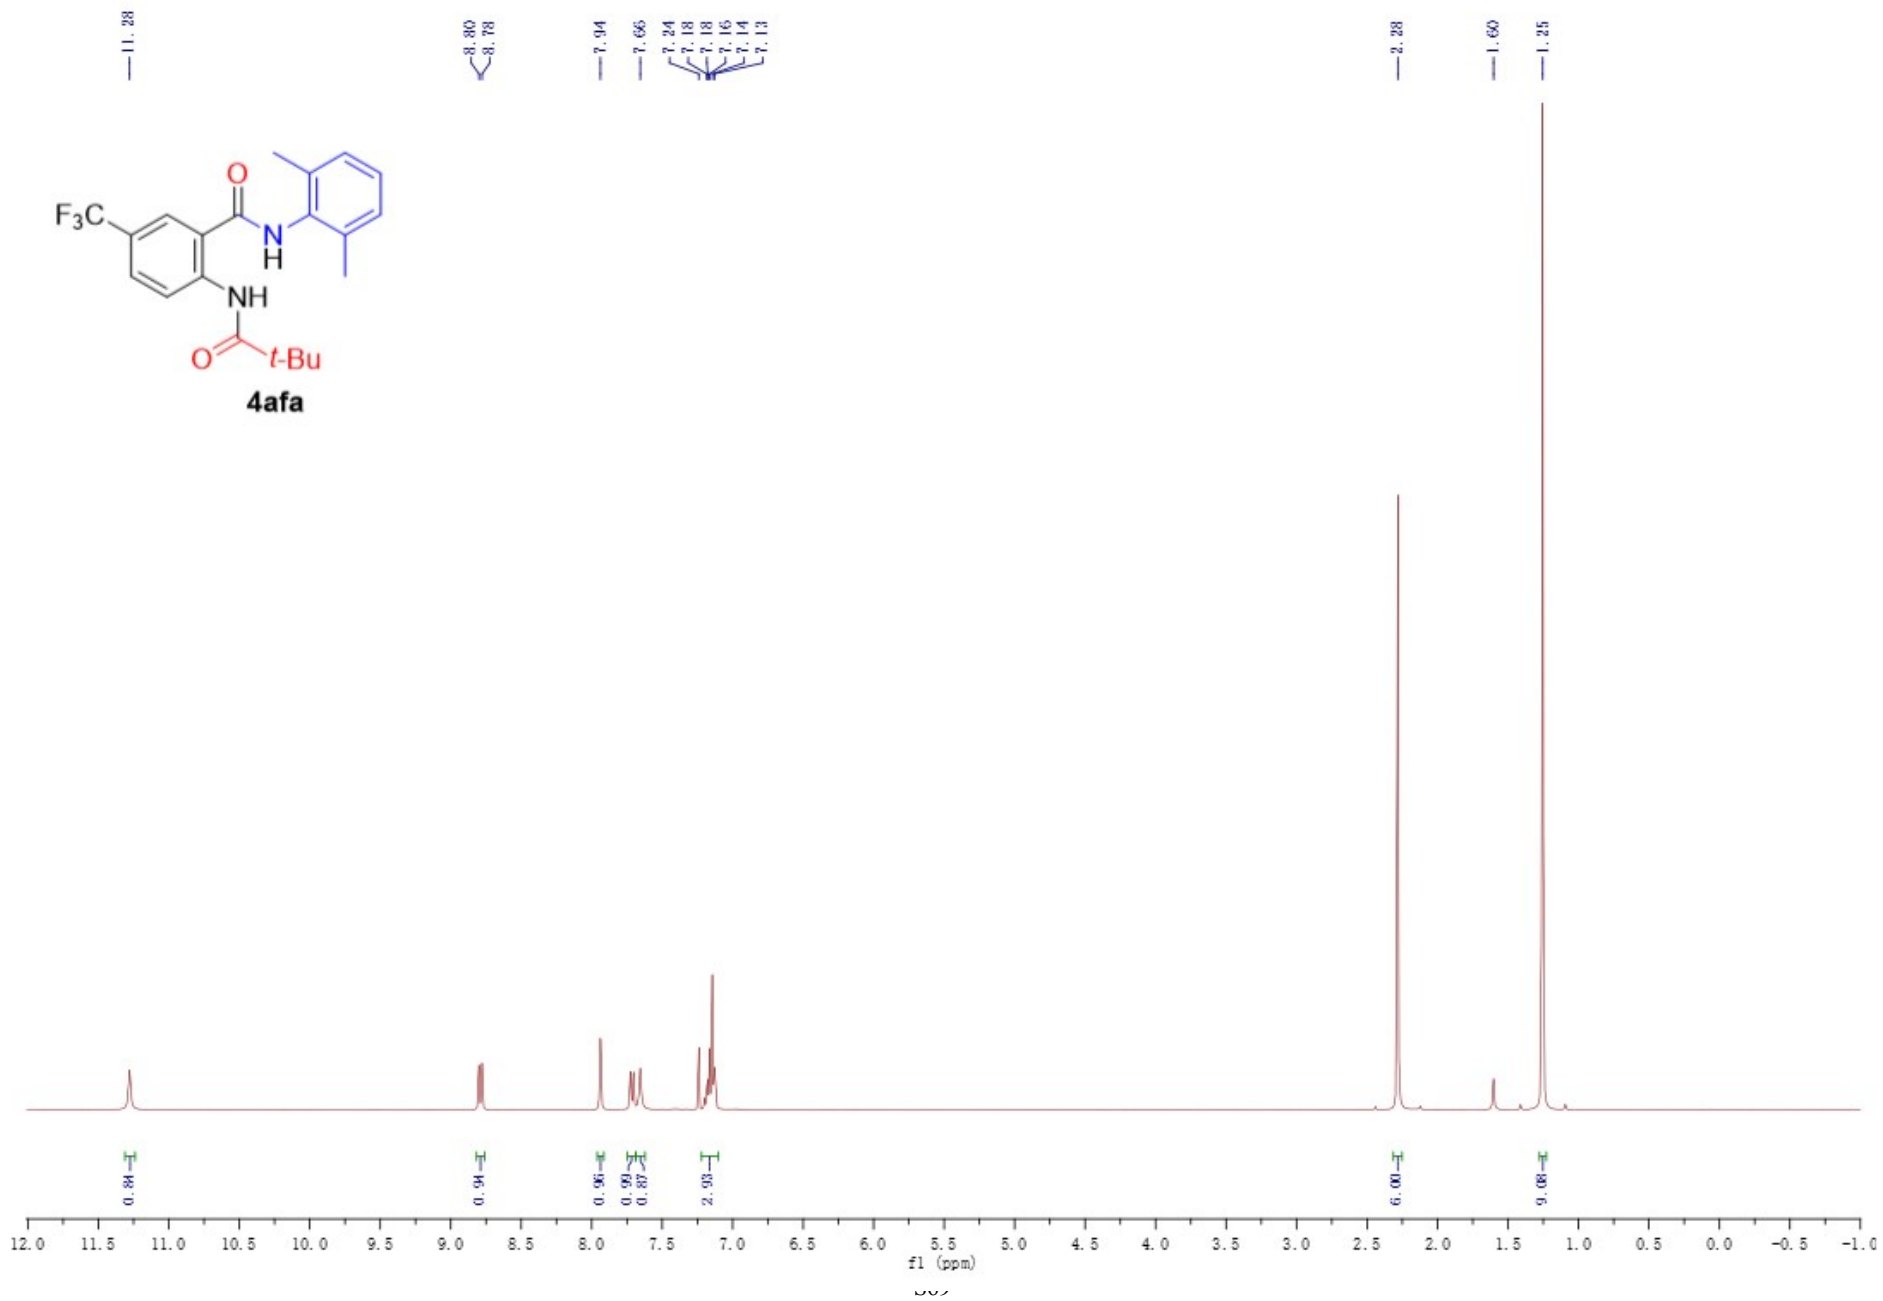

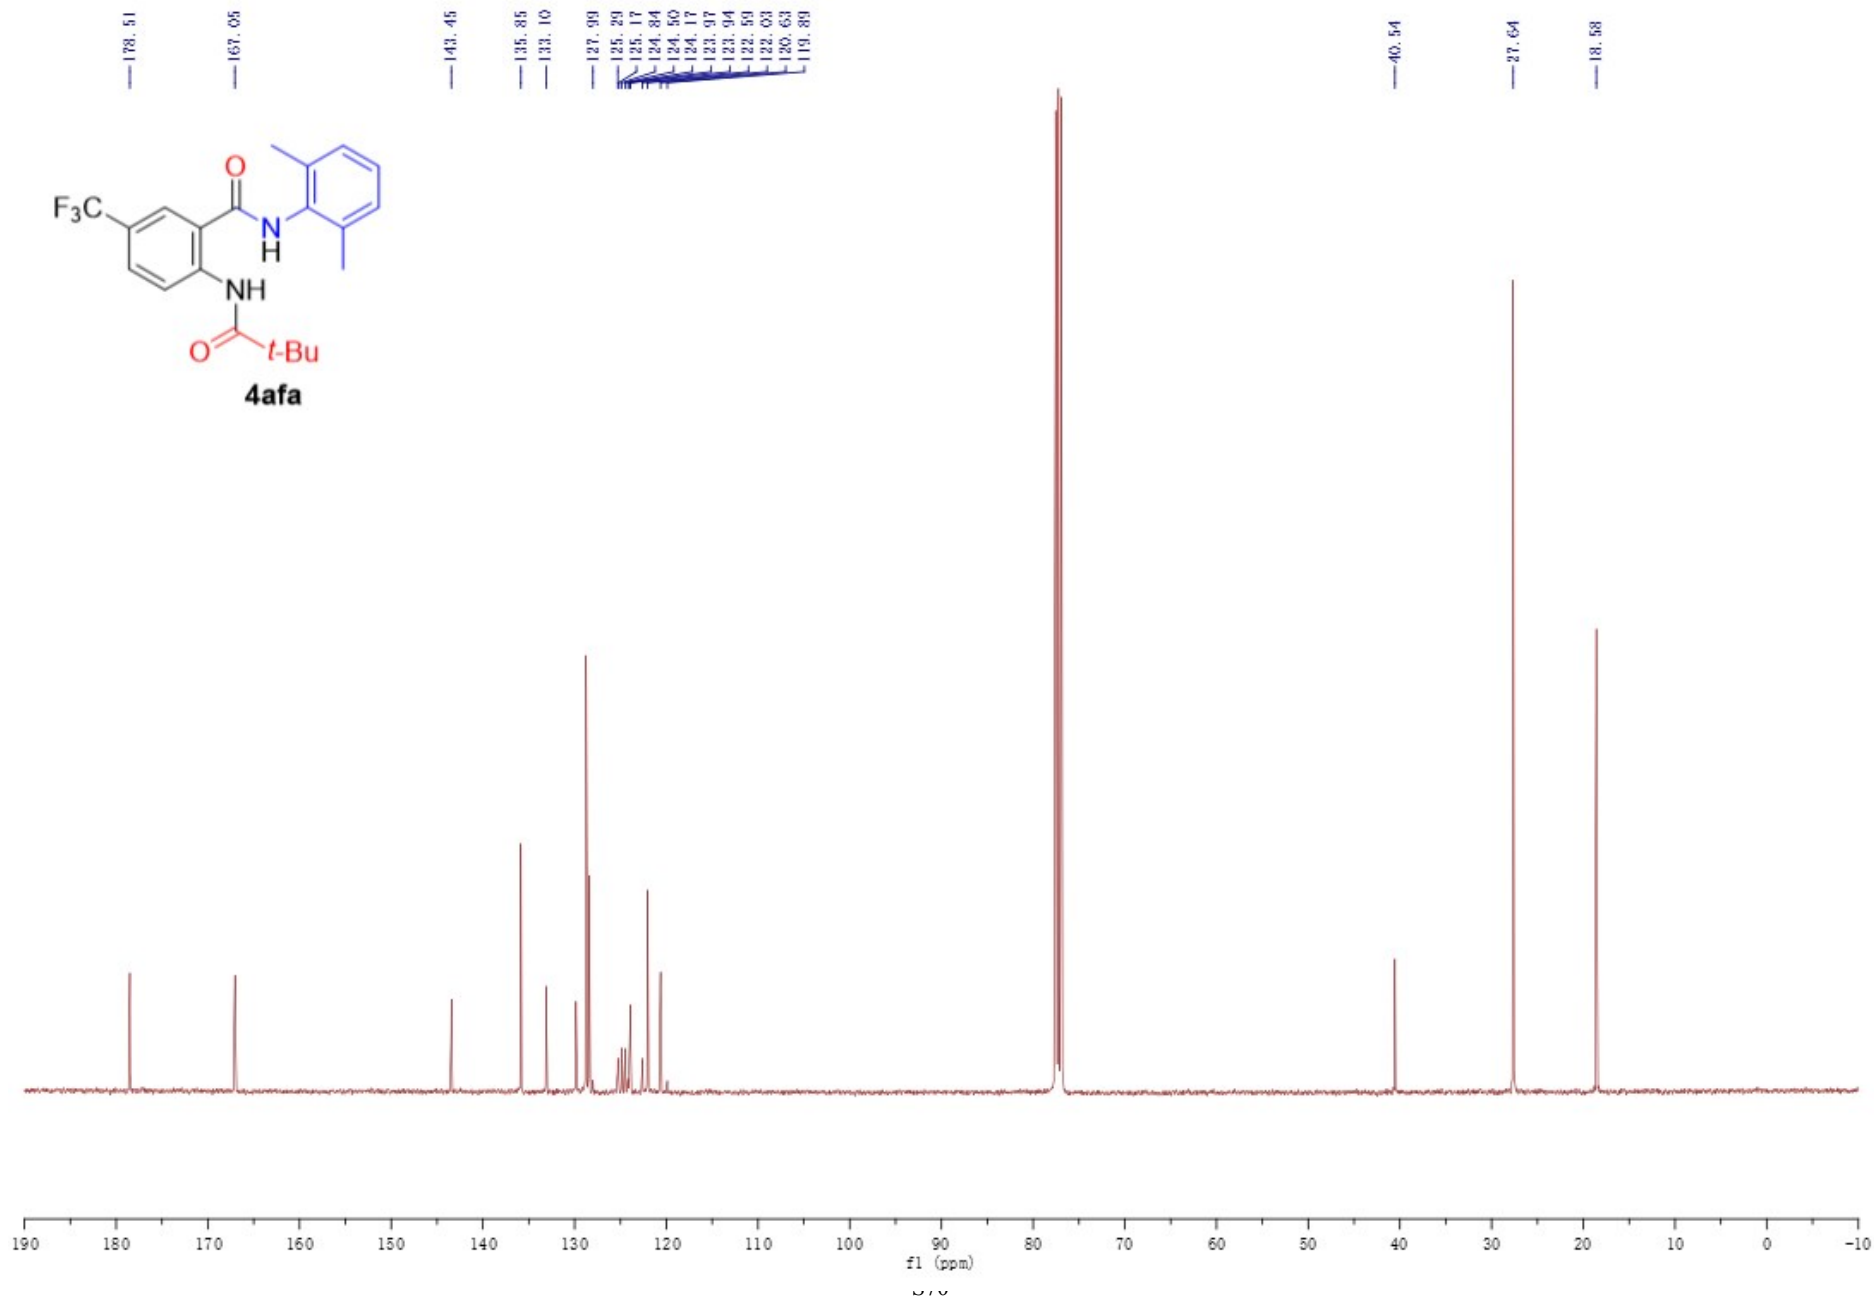

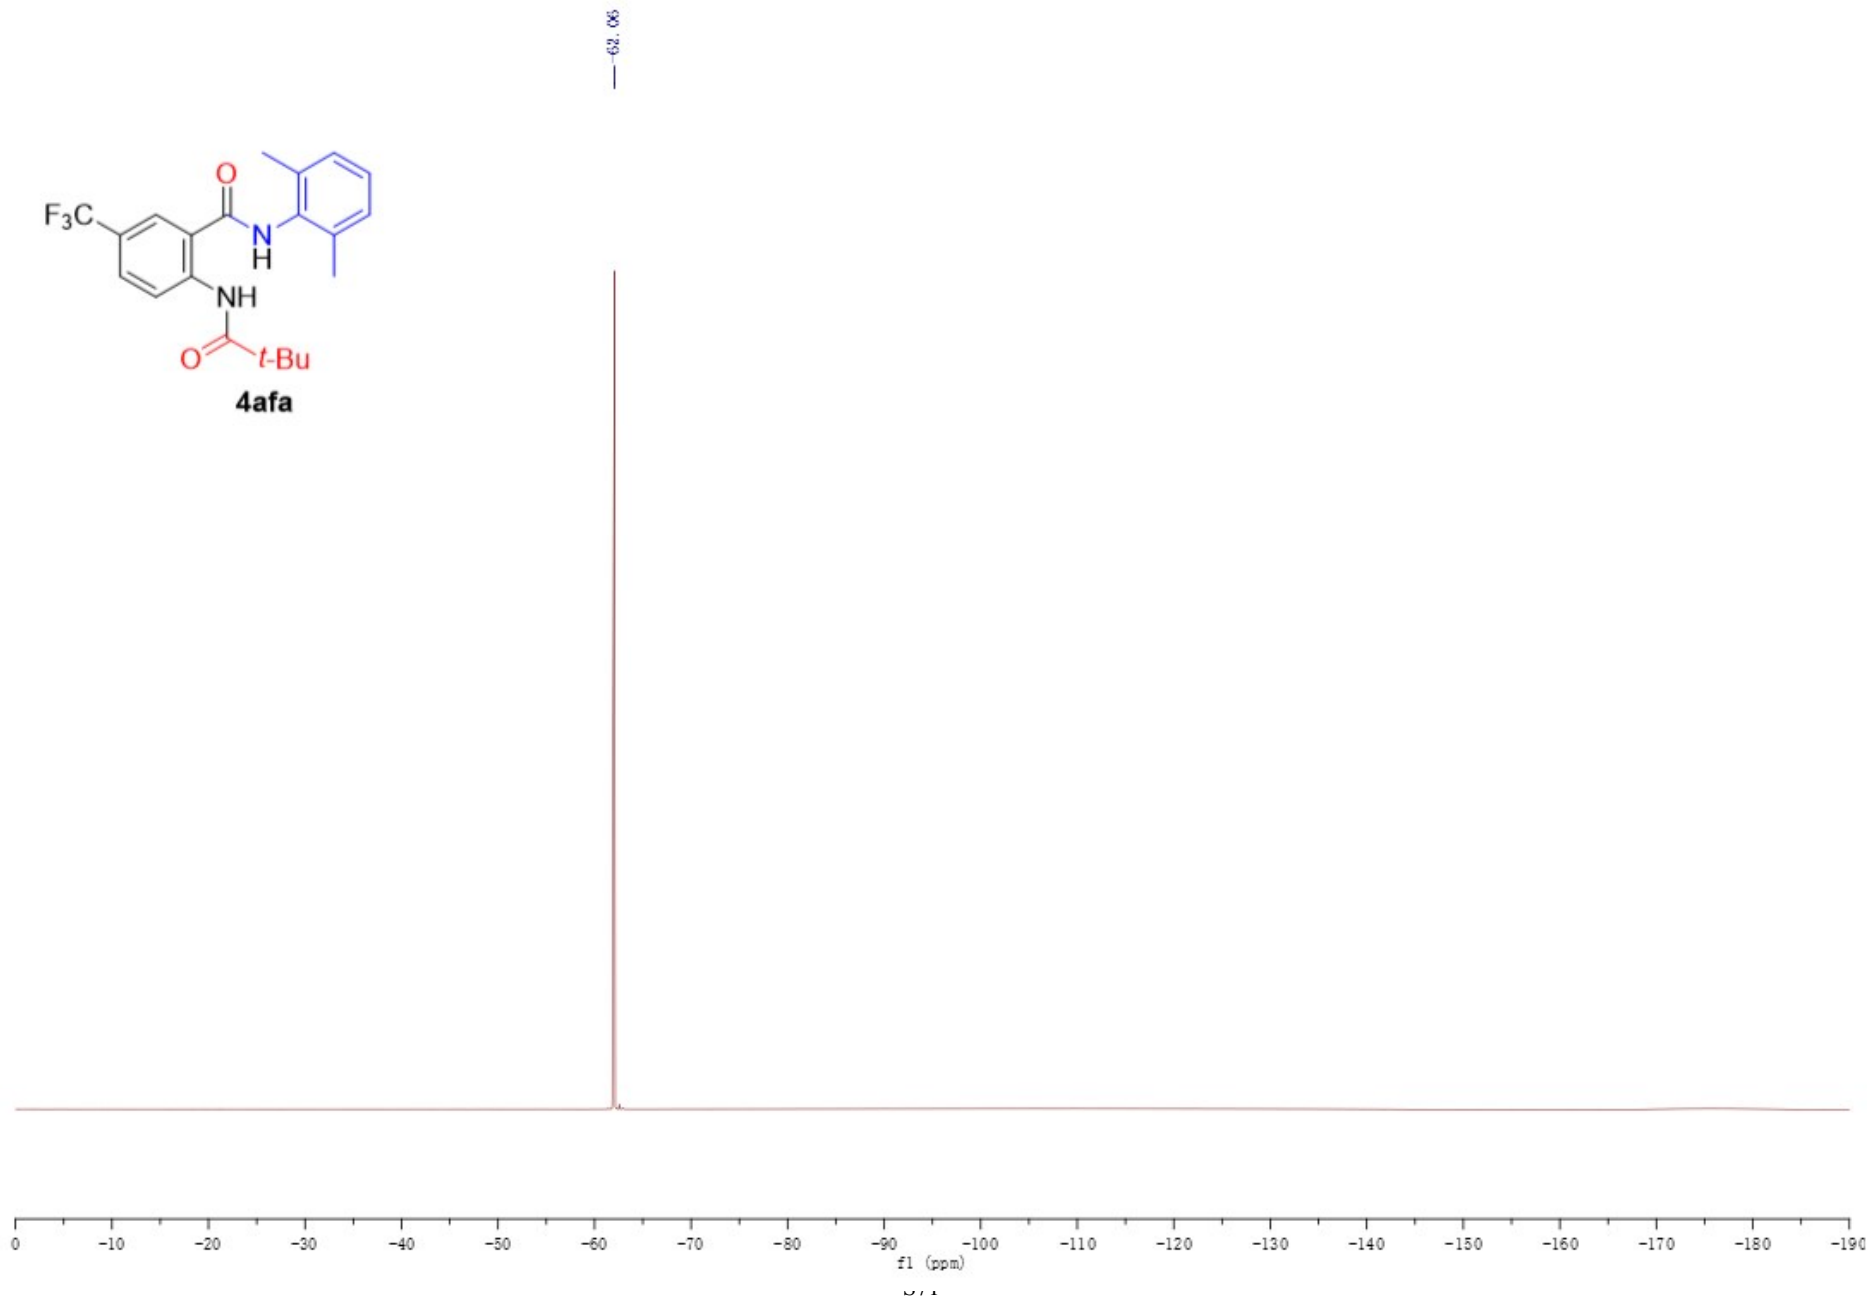

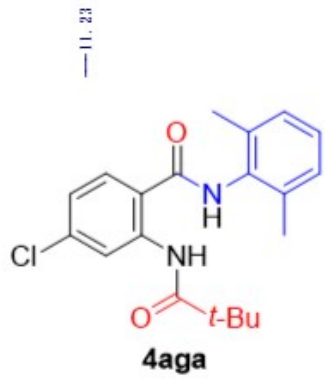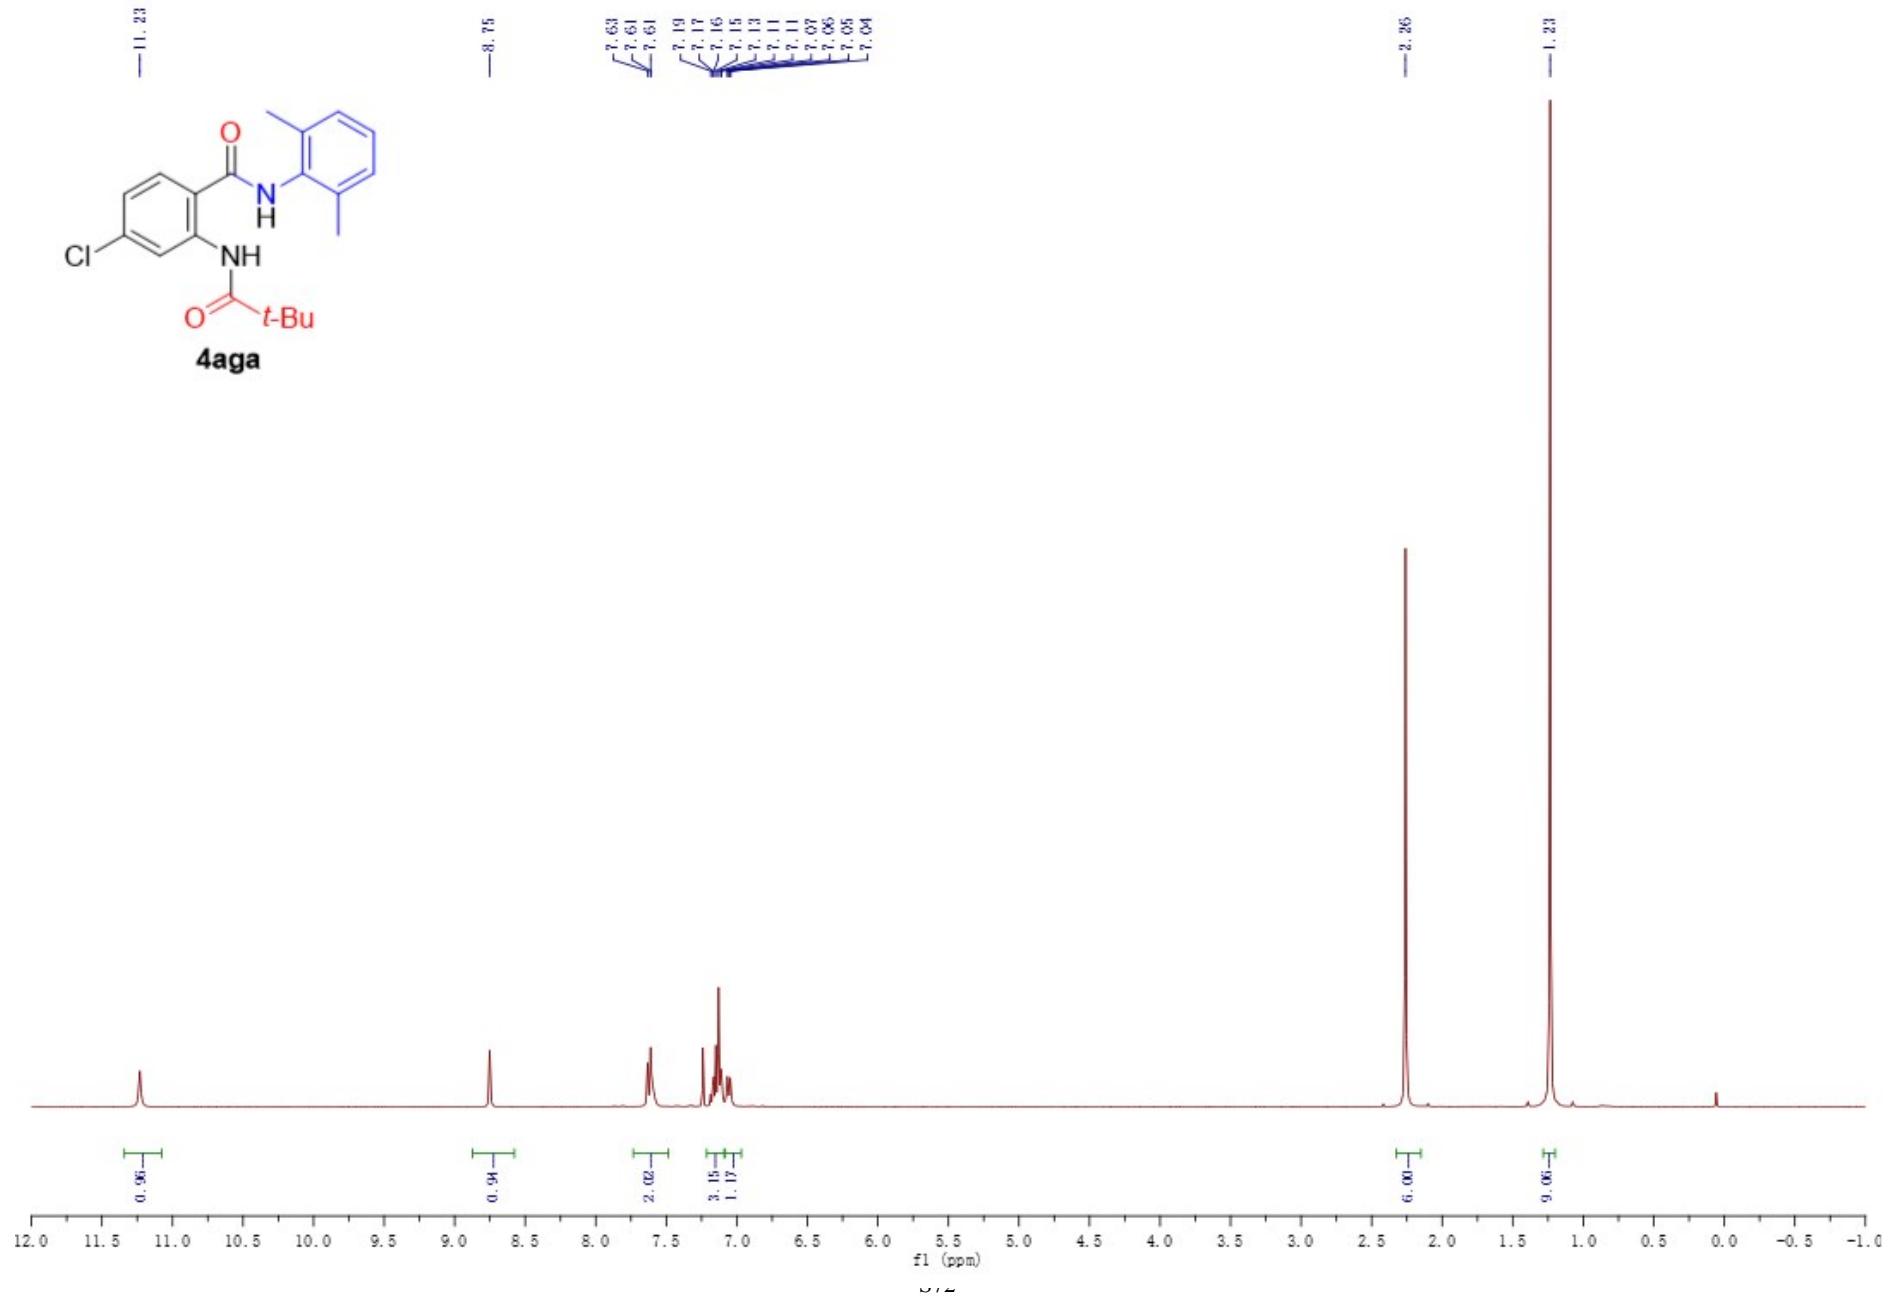



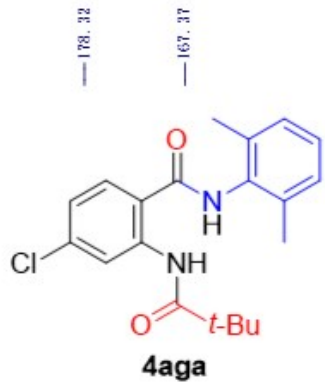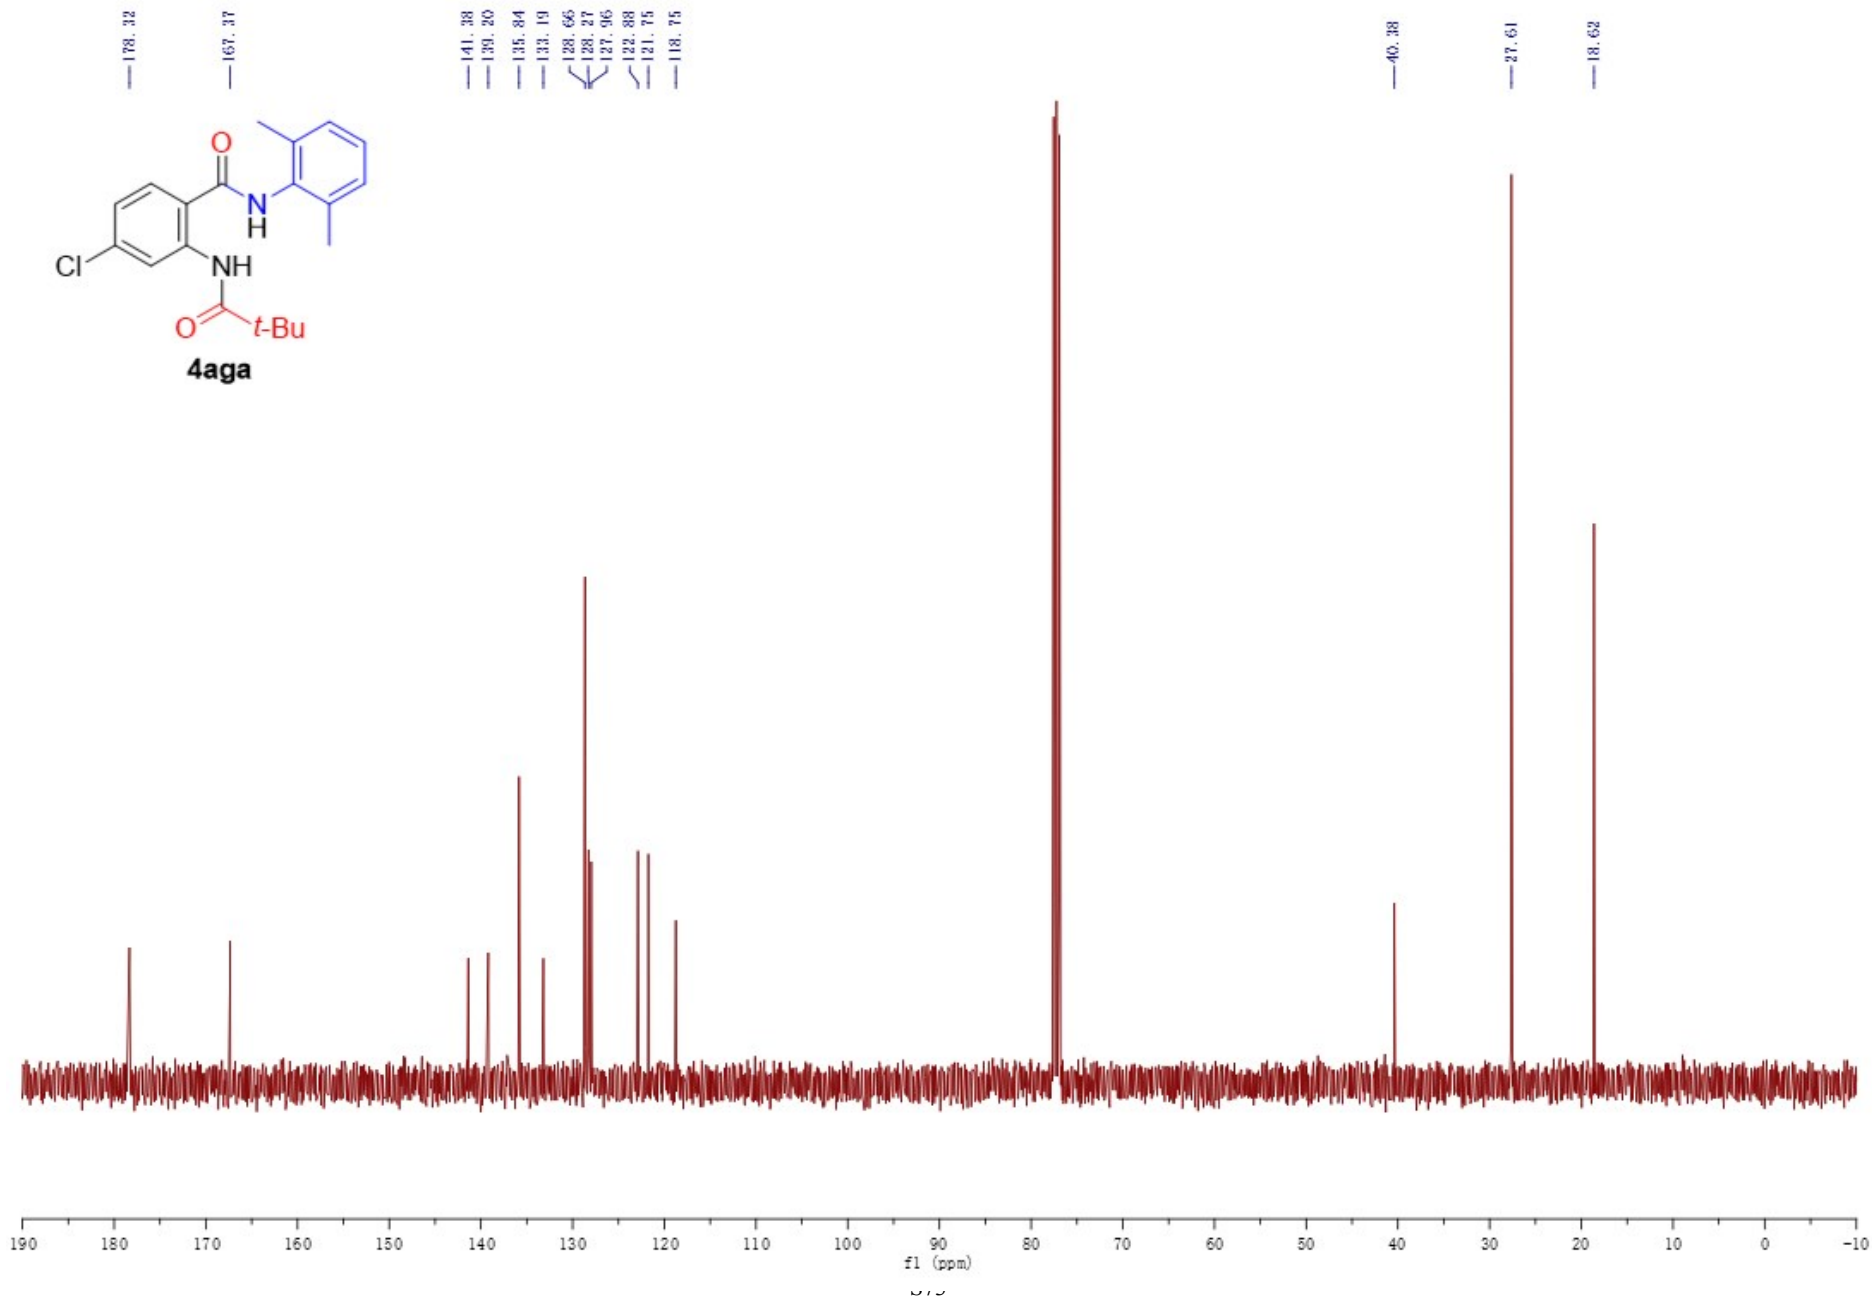

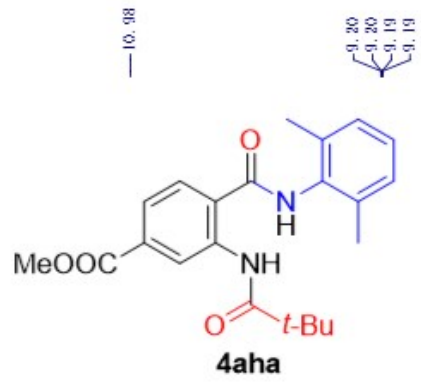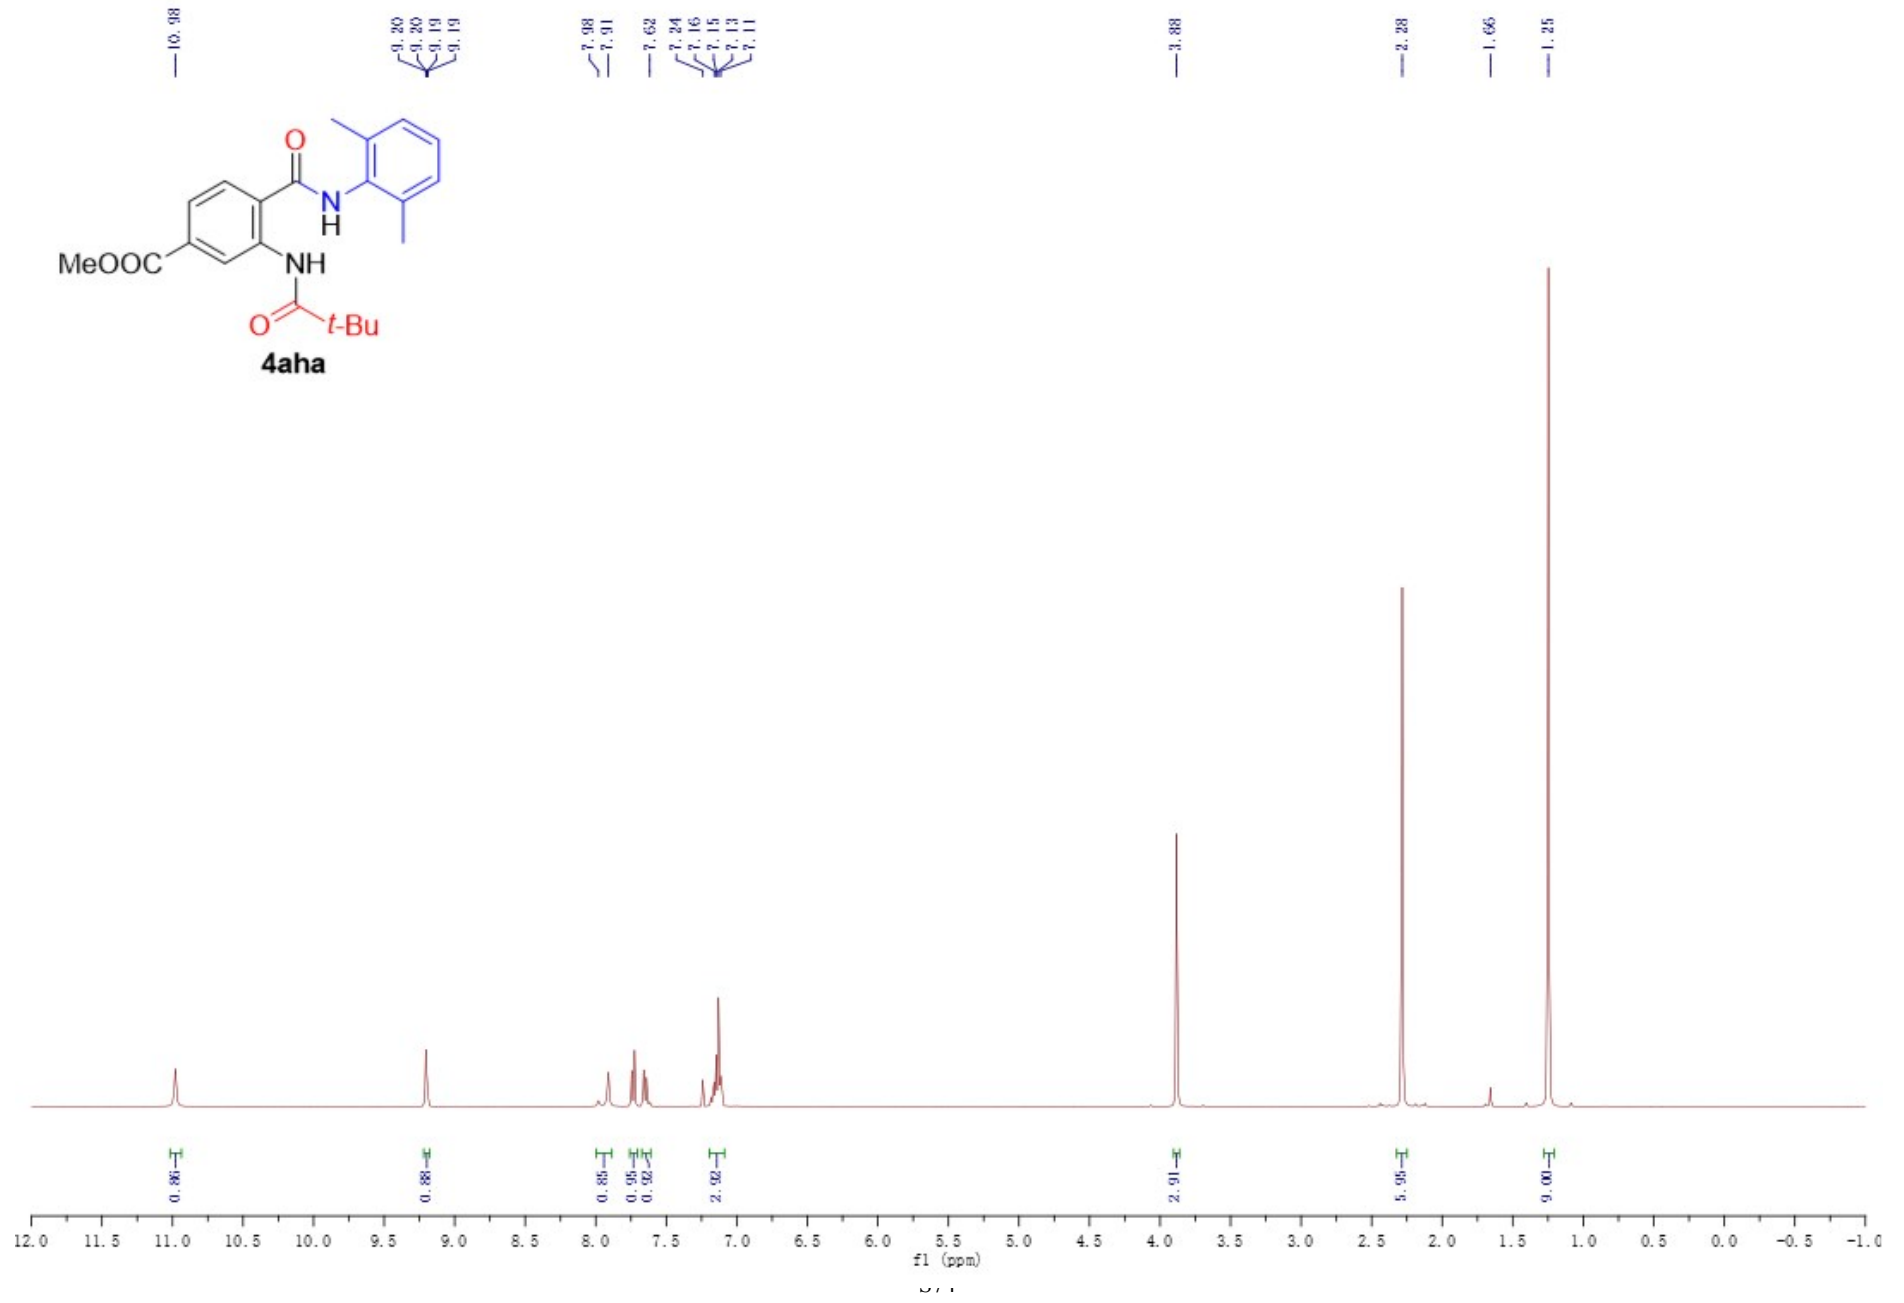

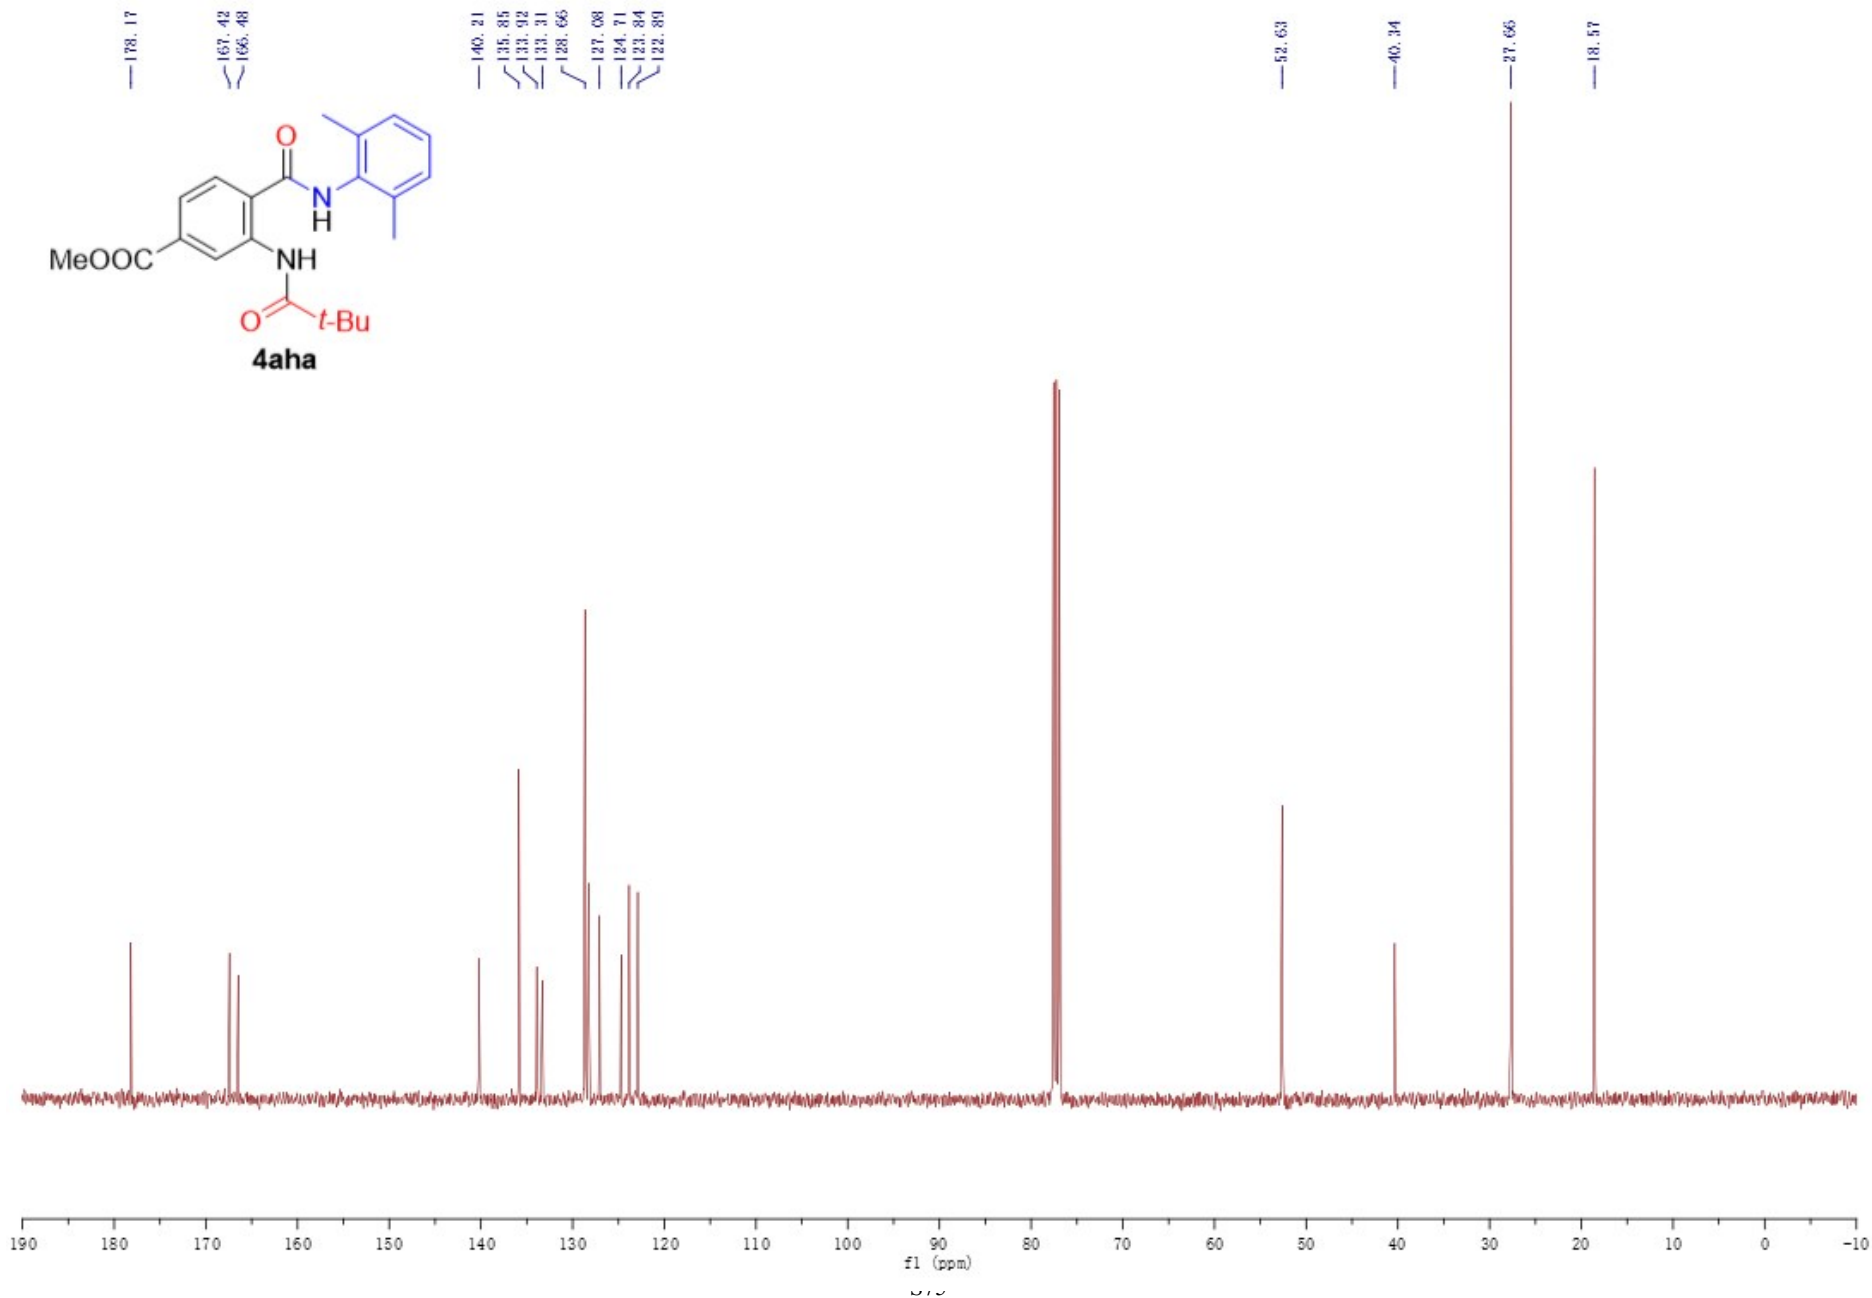

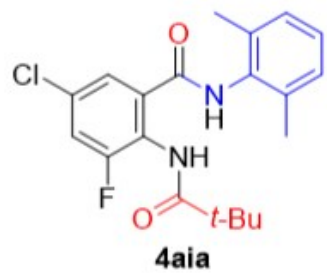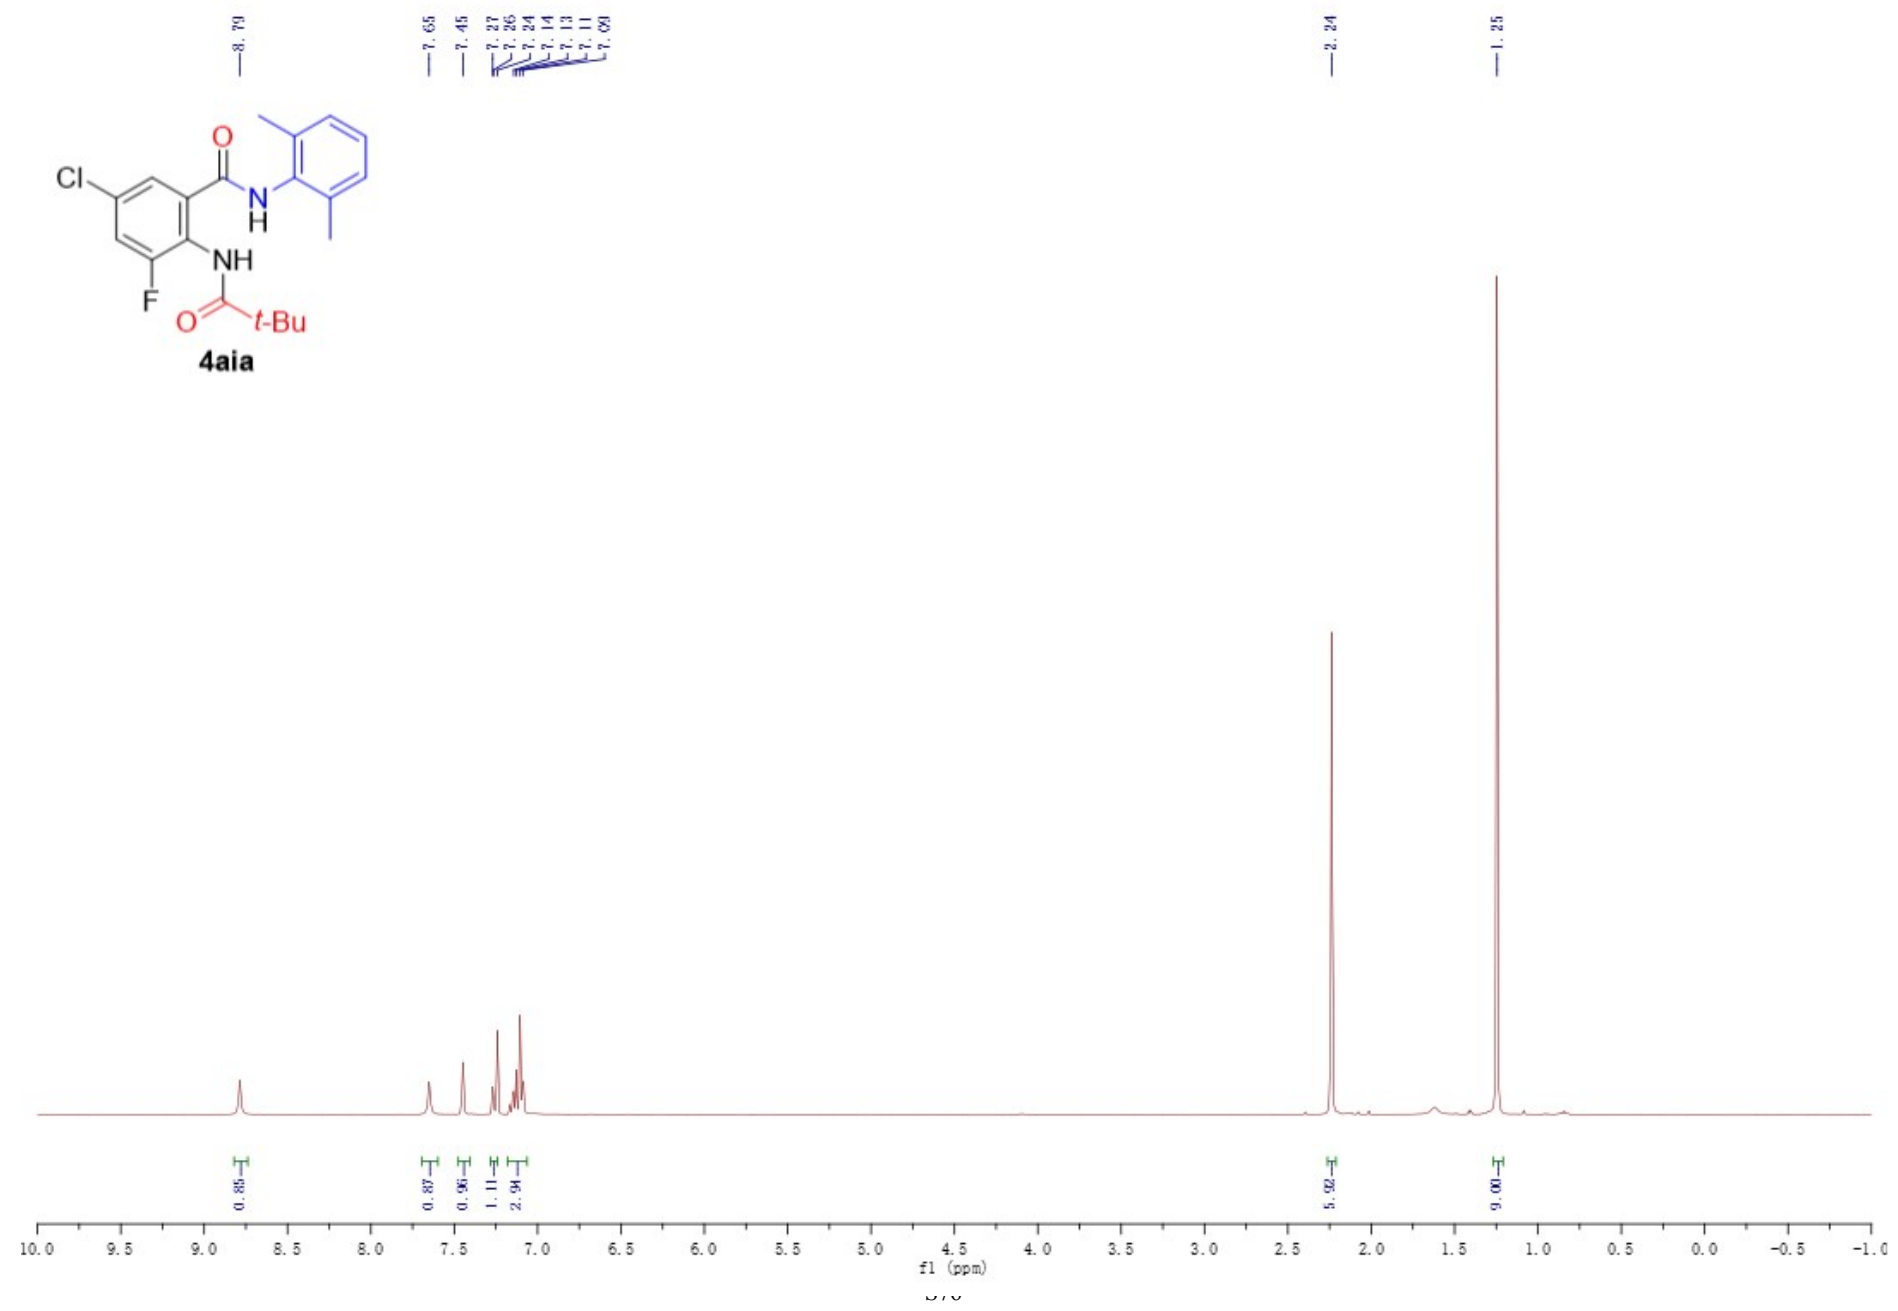

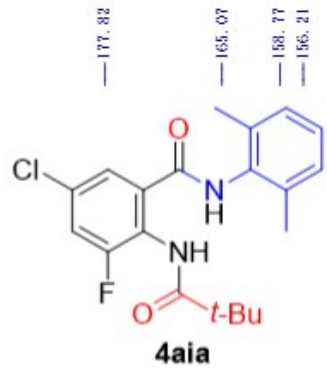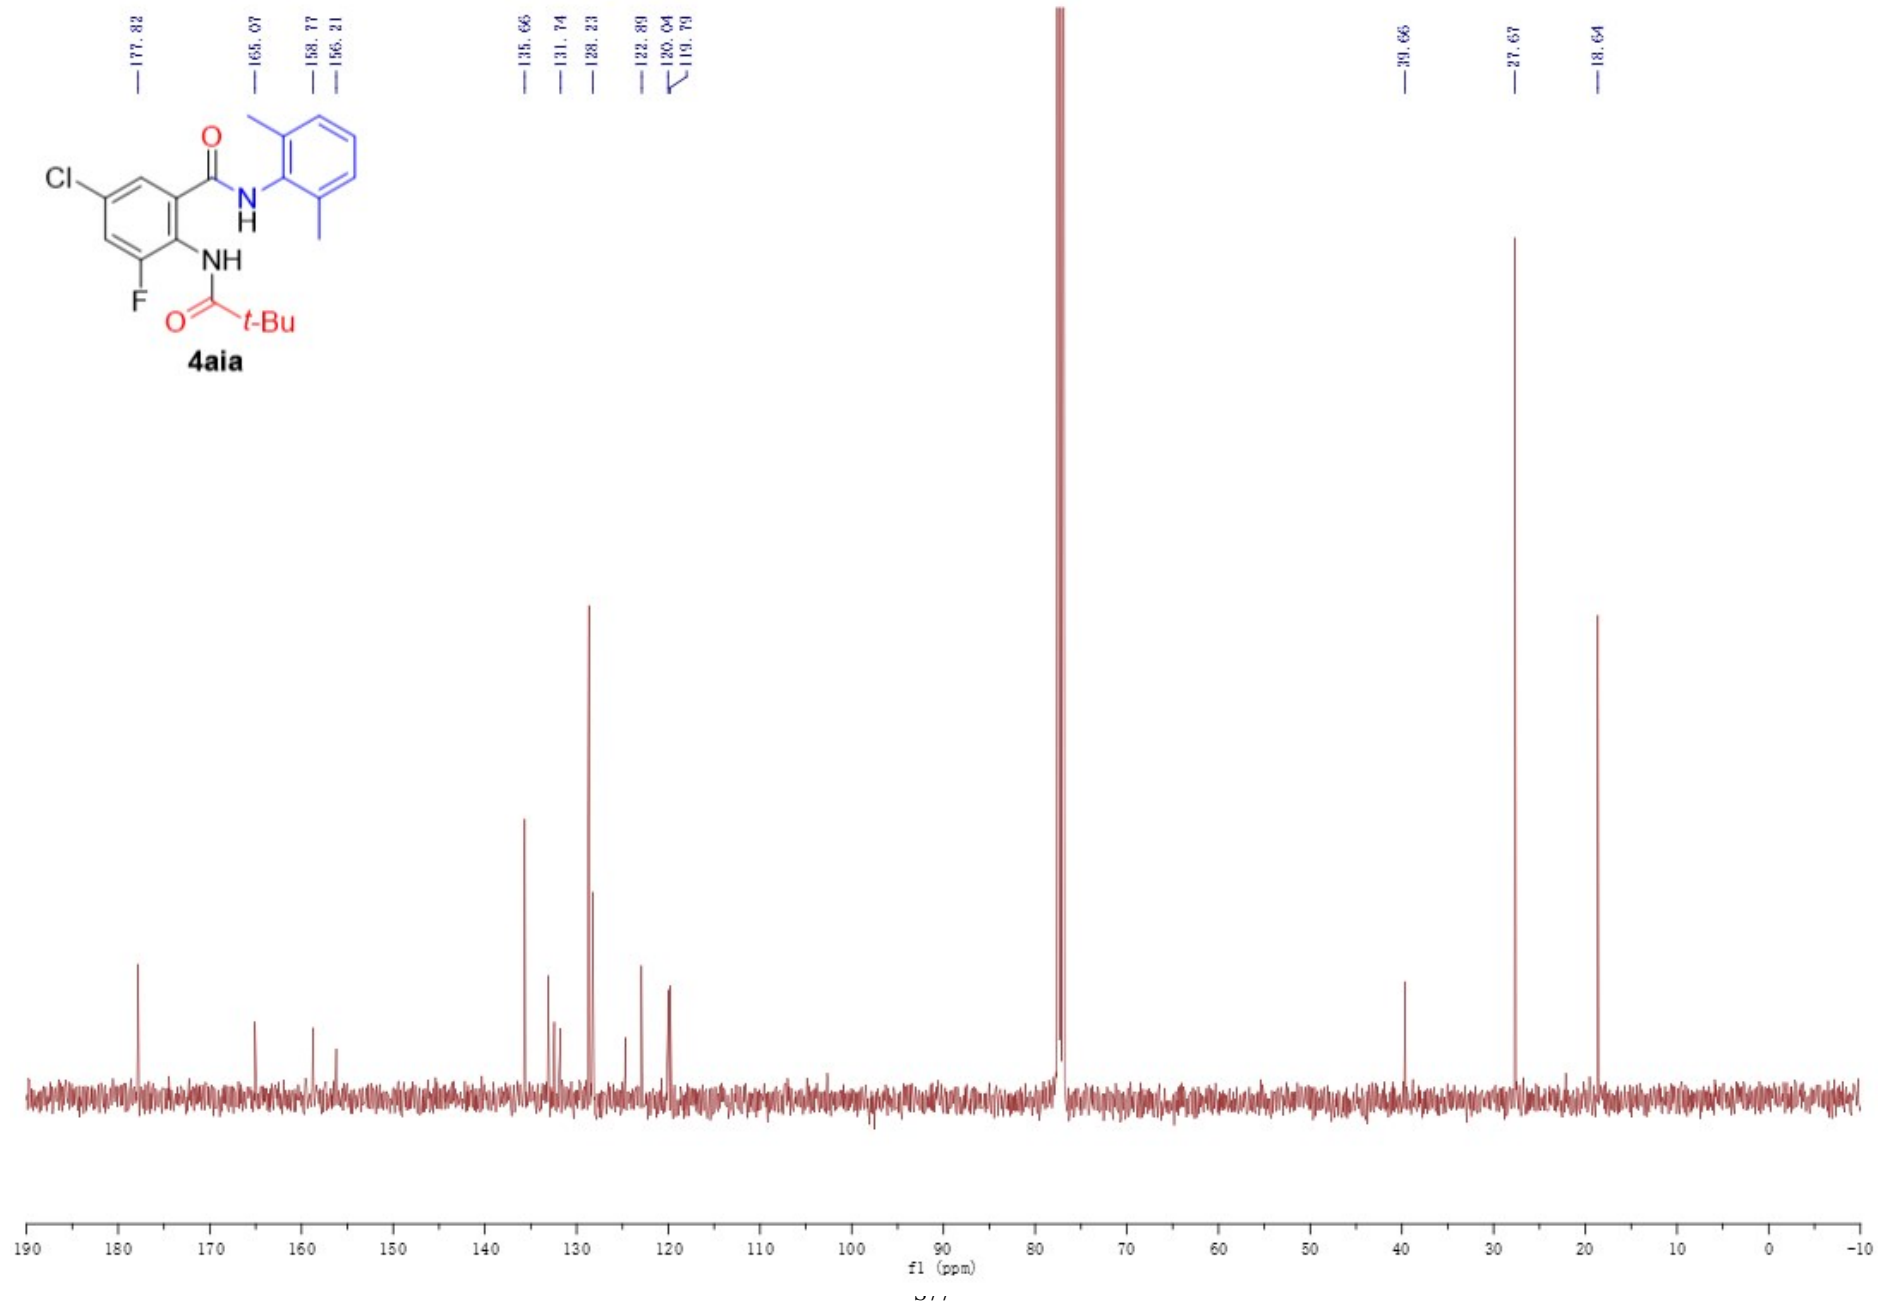



110.48  
110.51

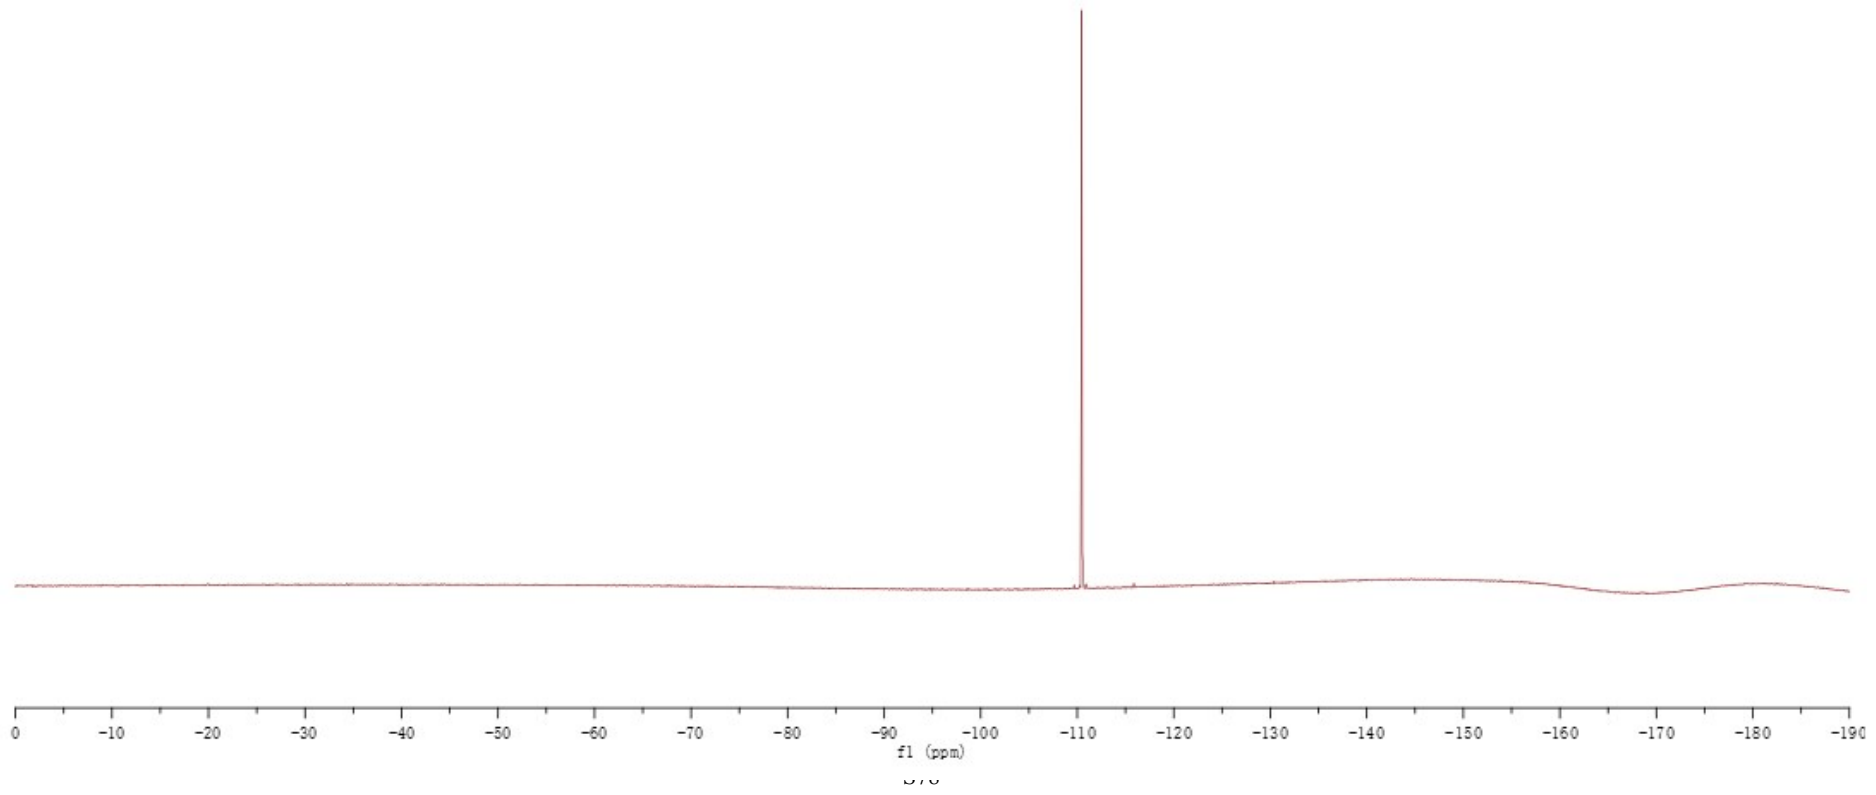

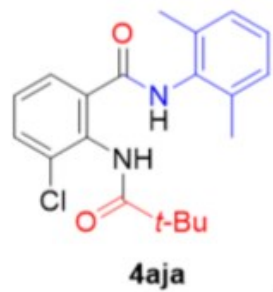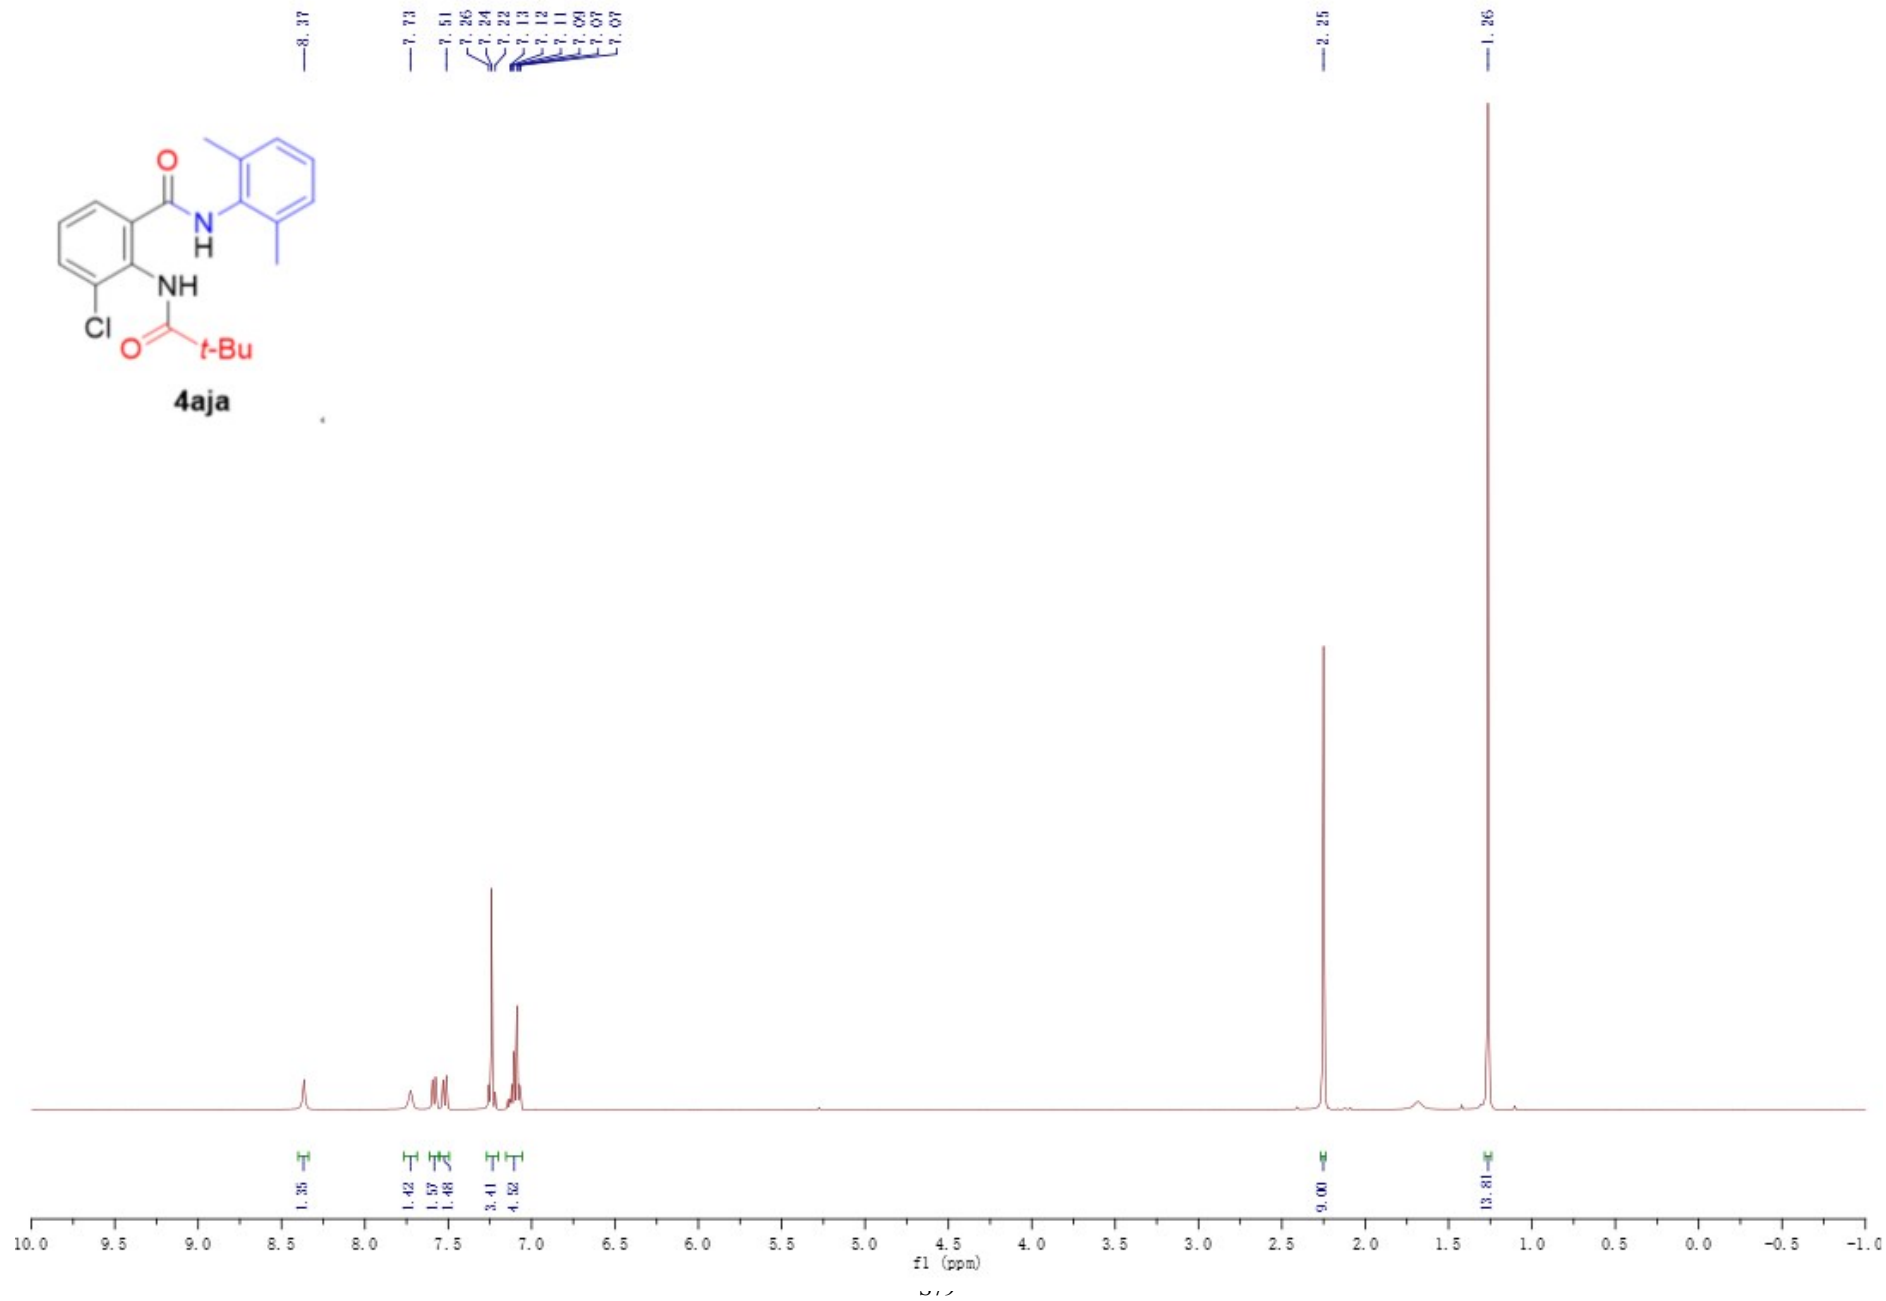

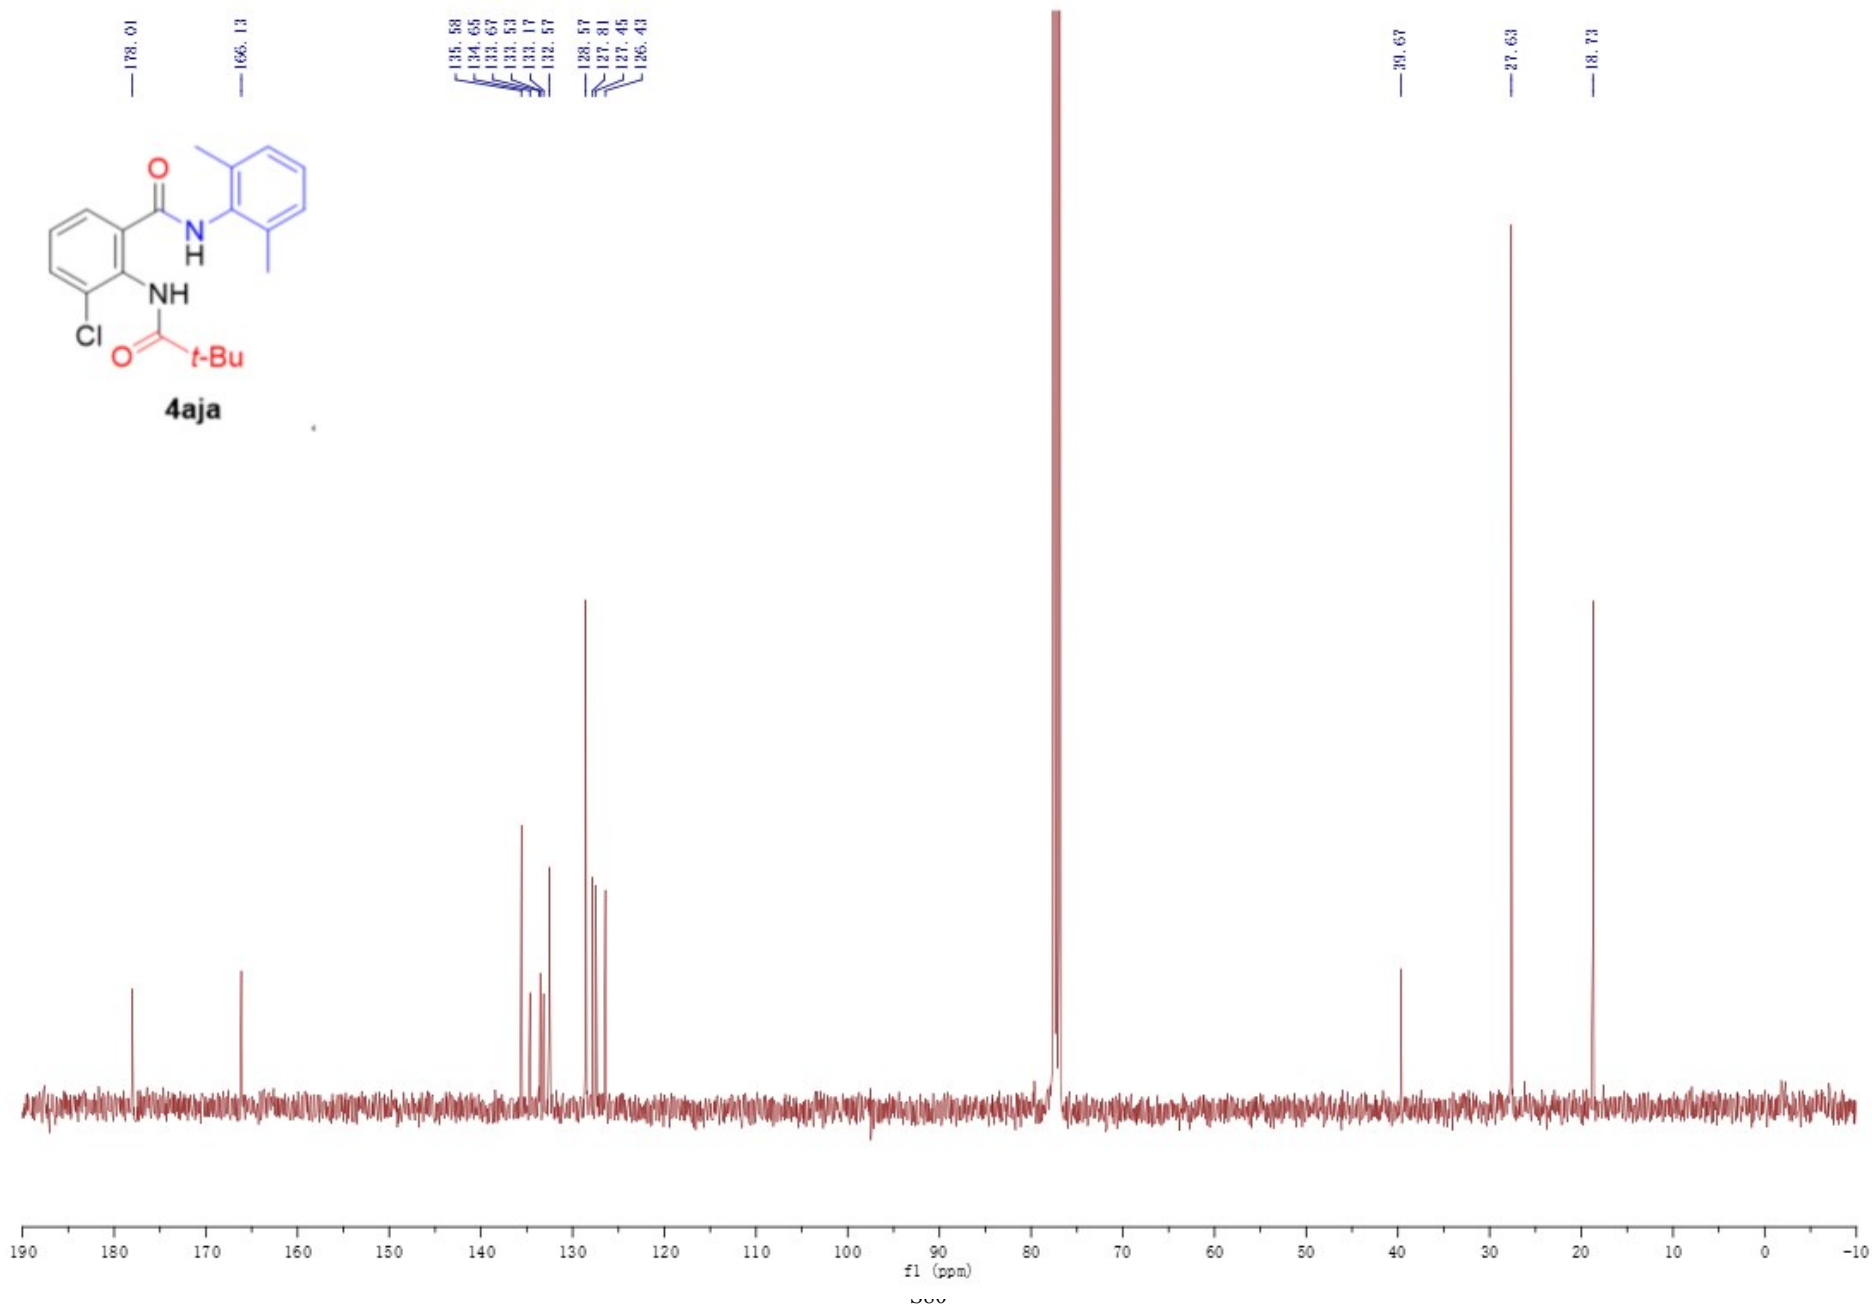



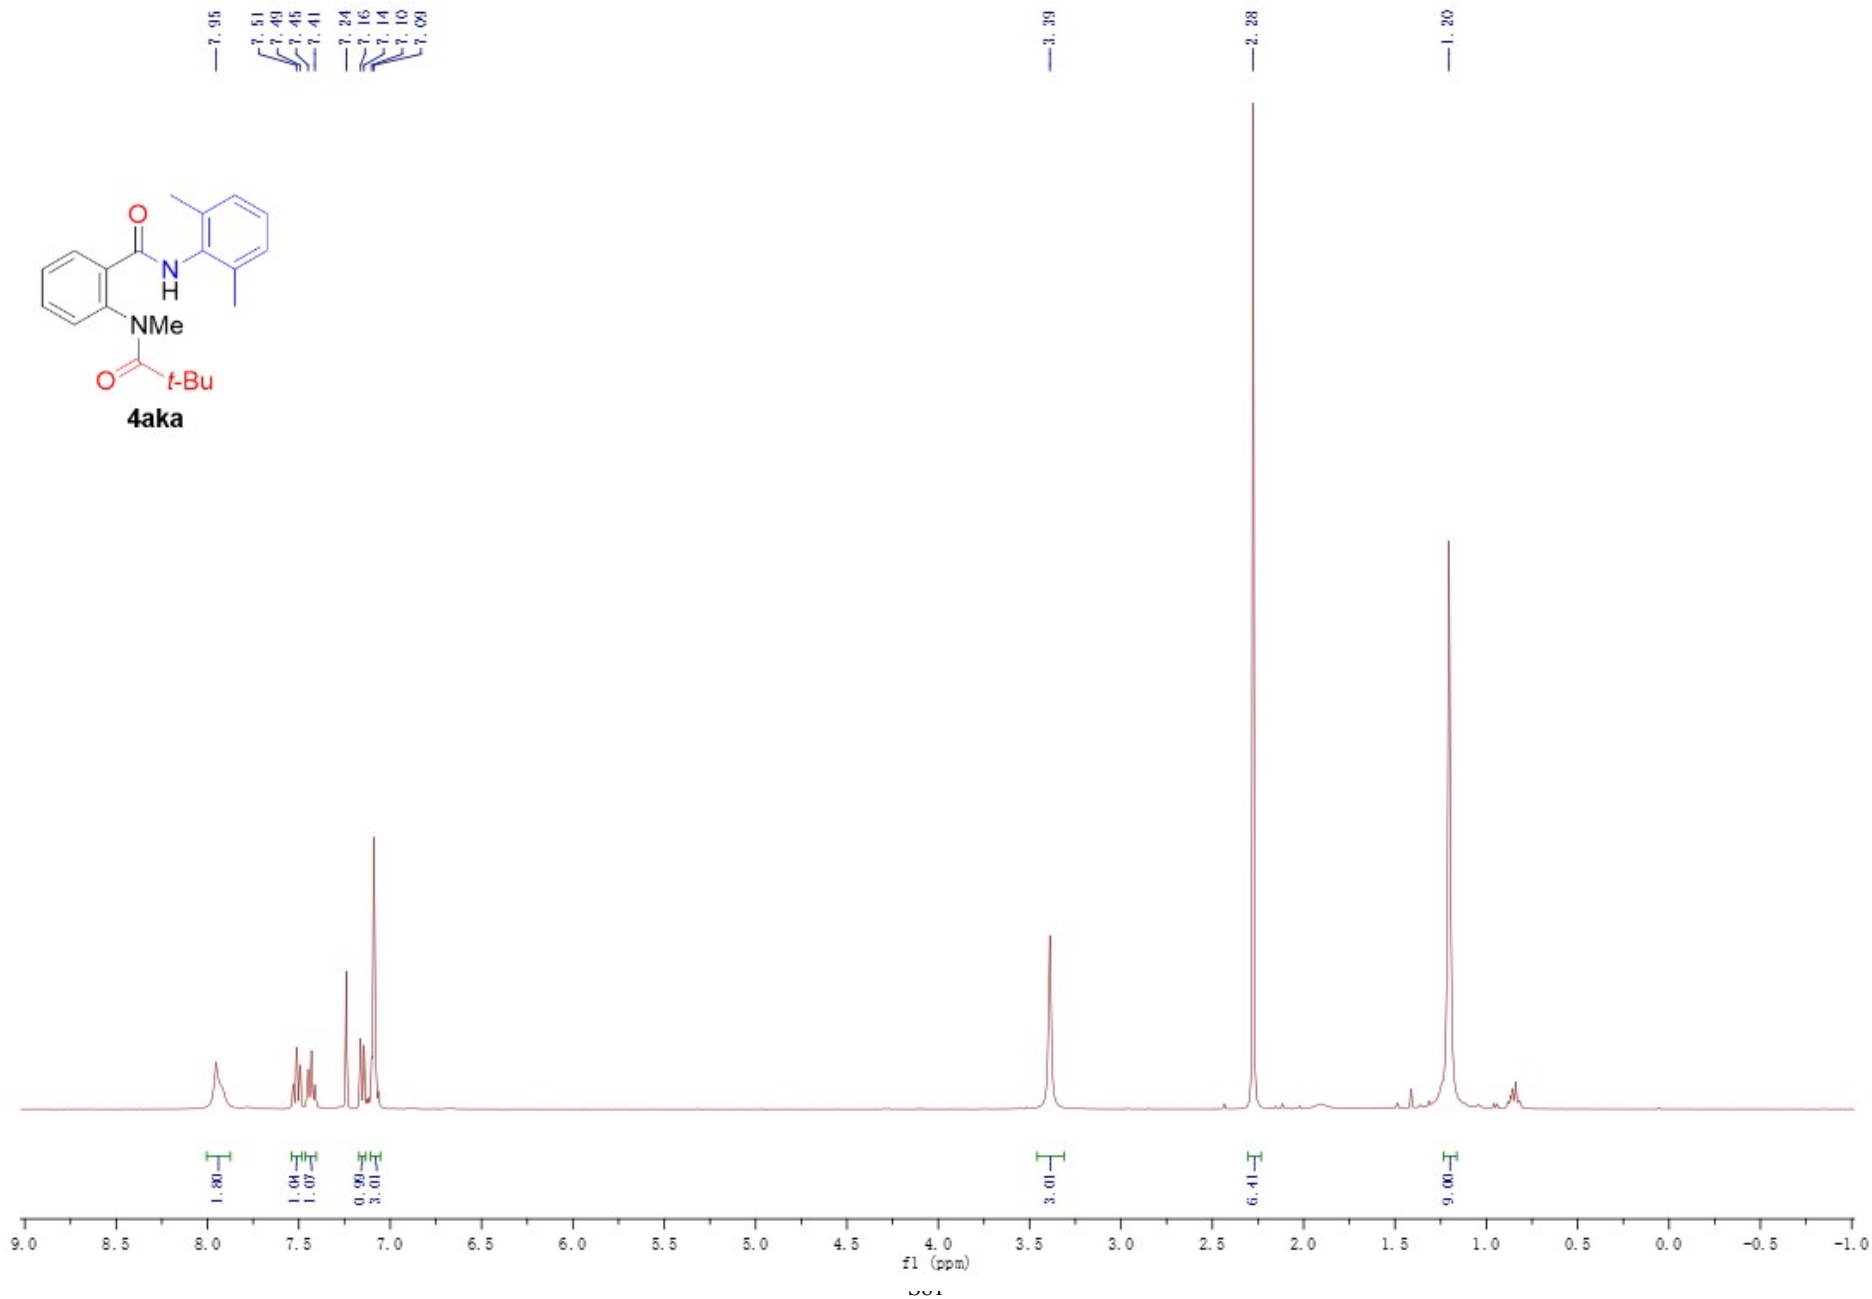

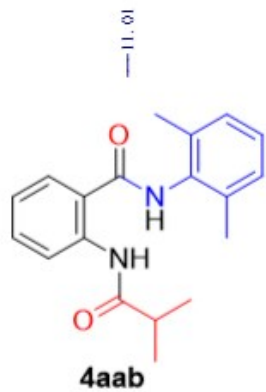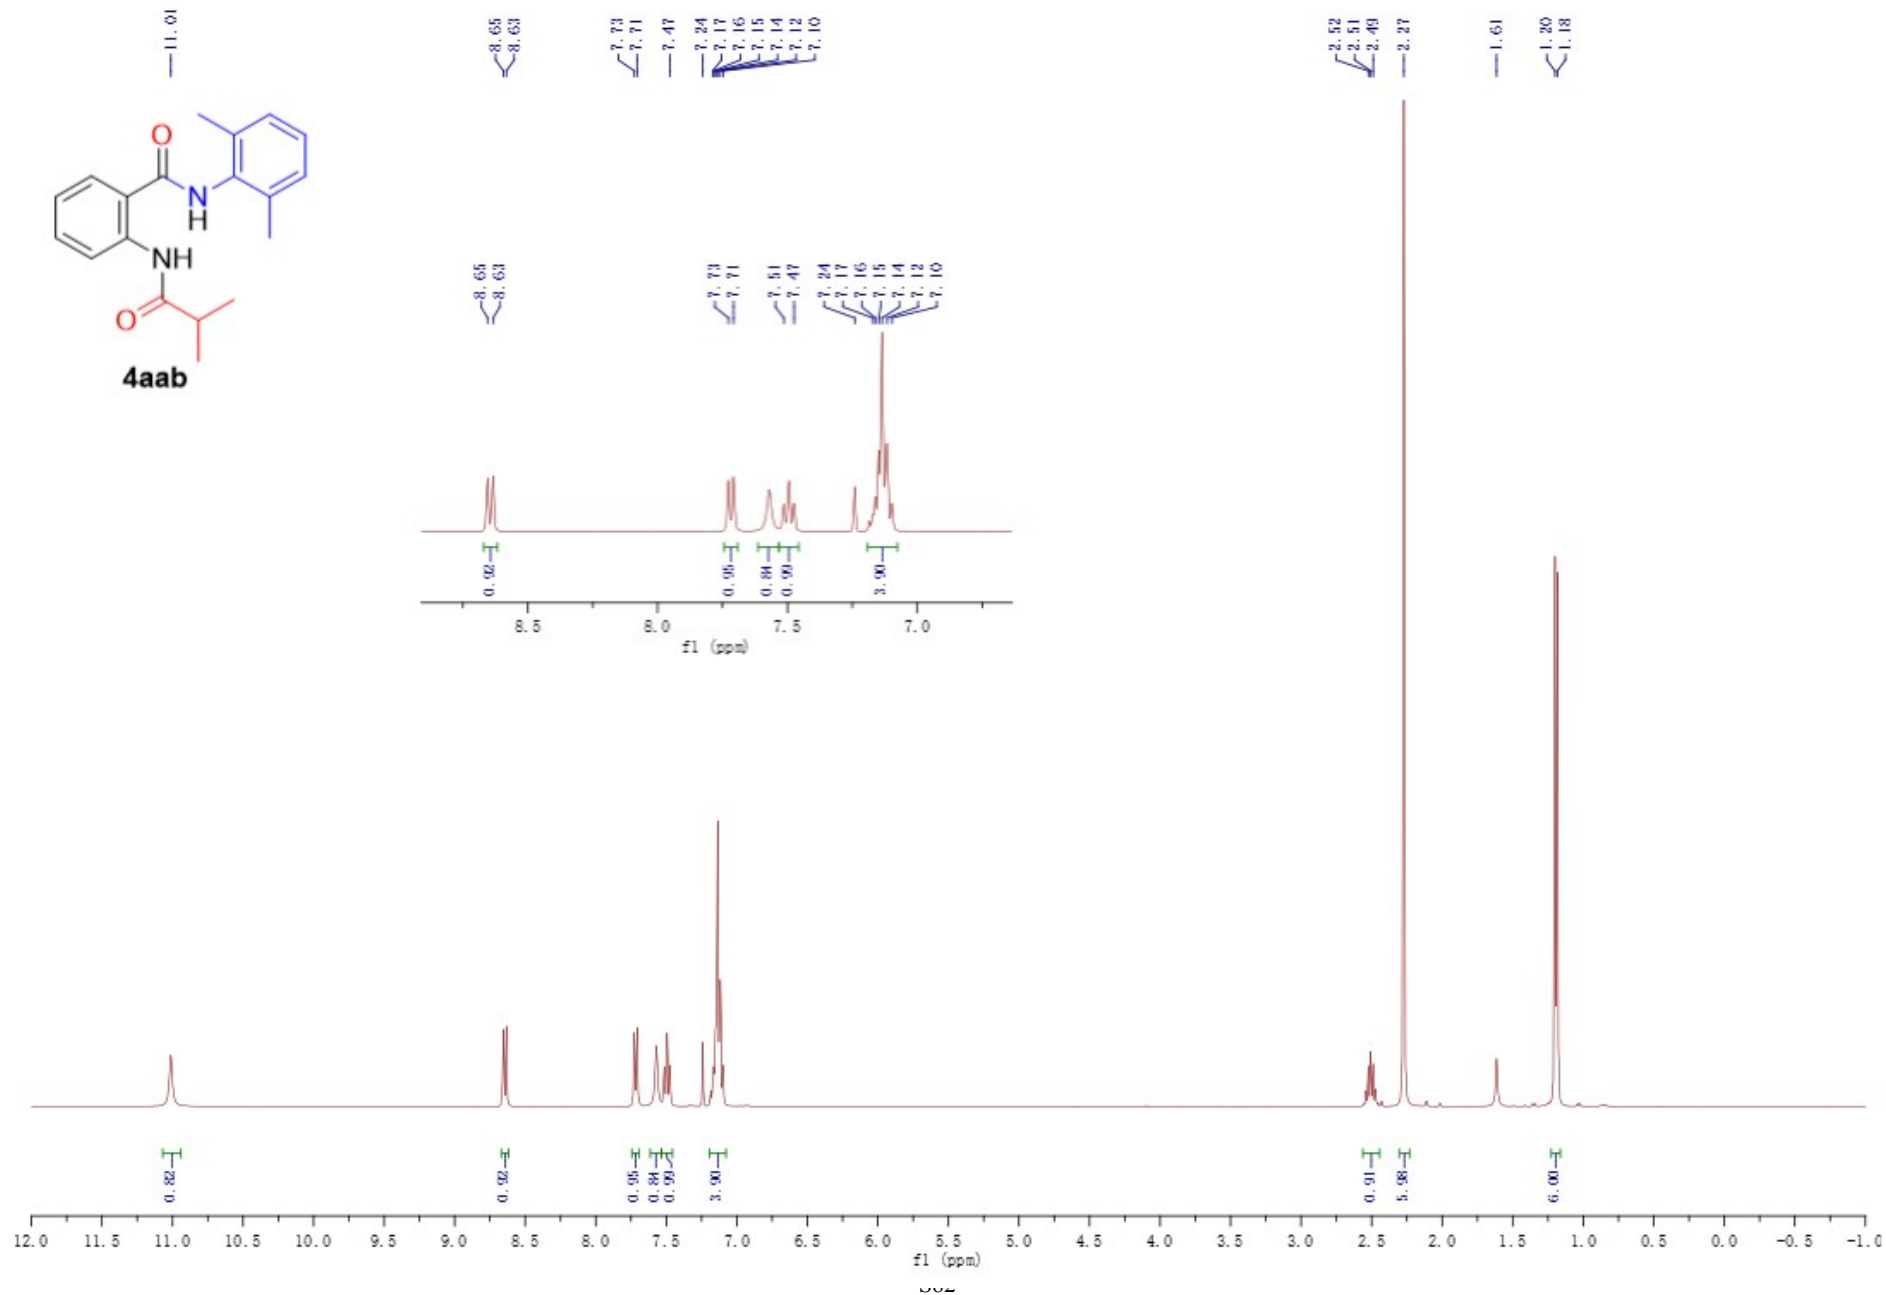

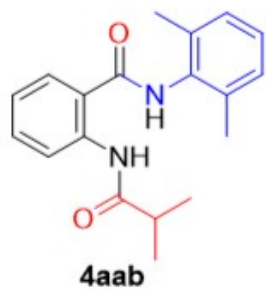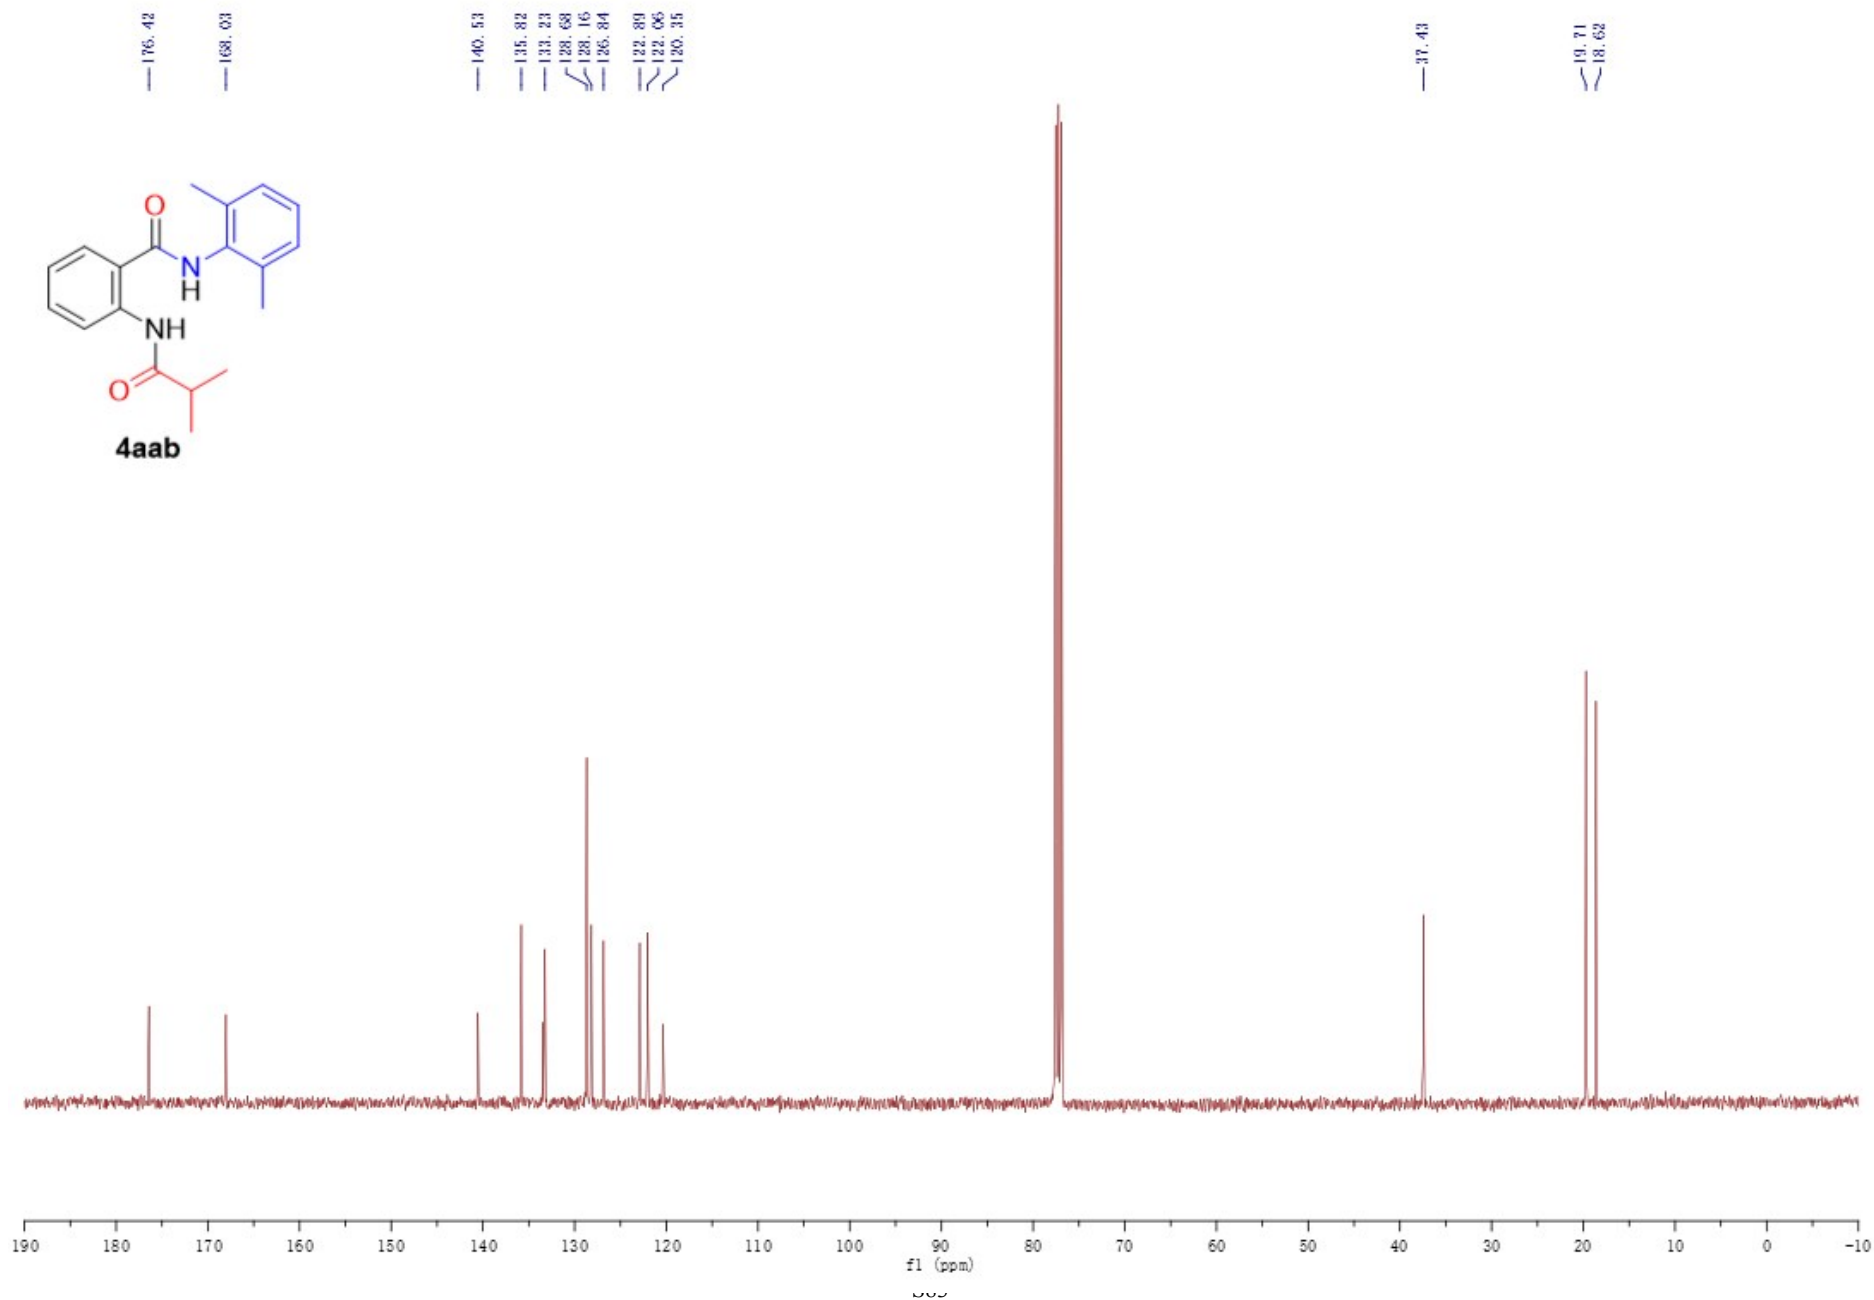

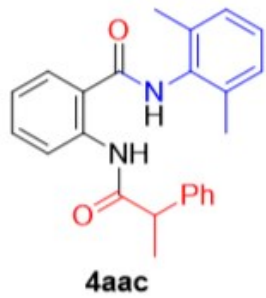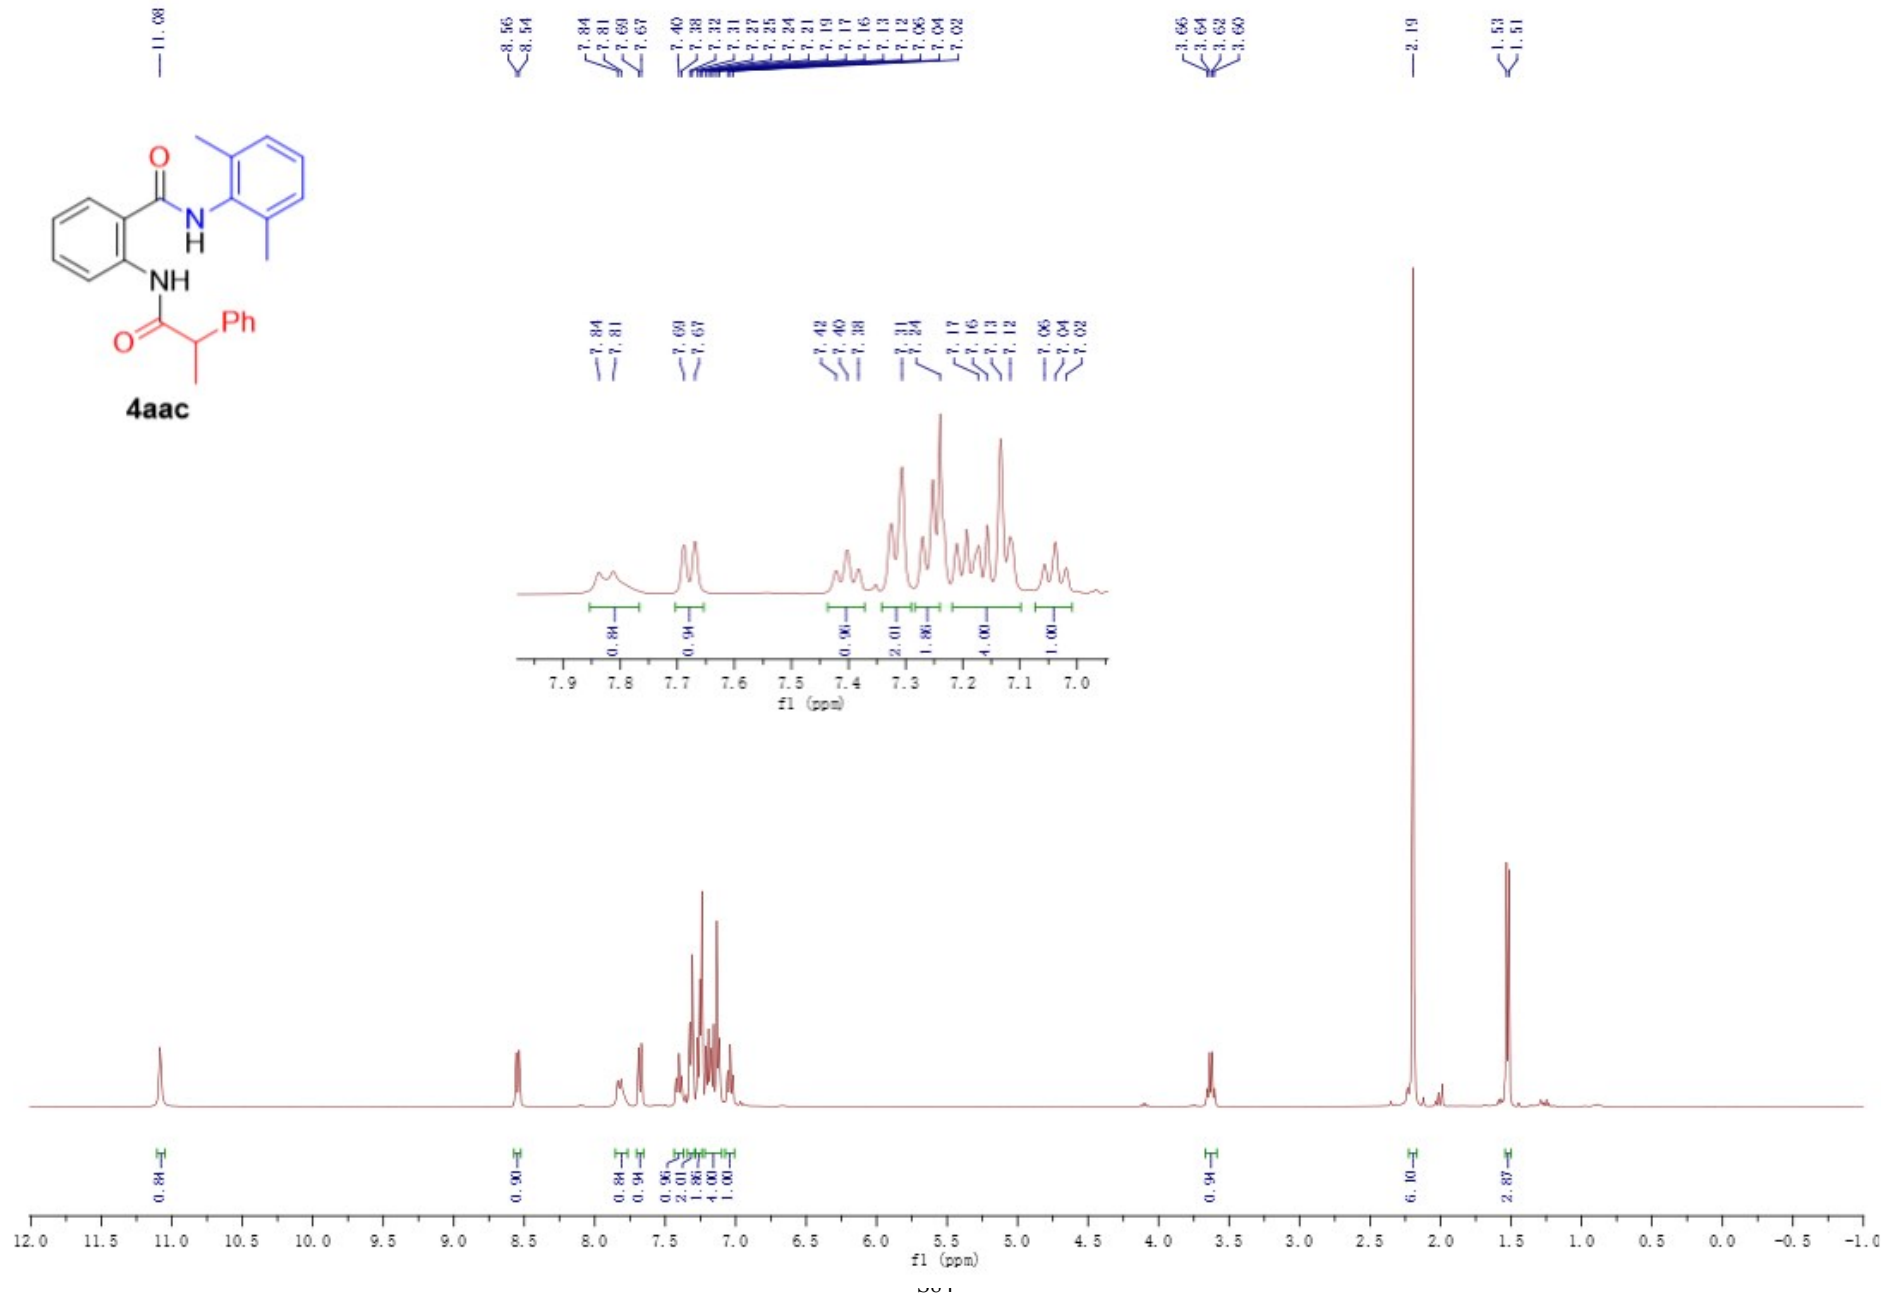

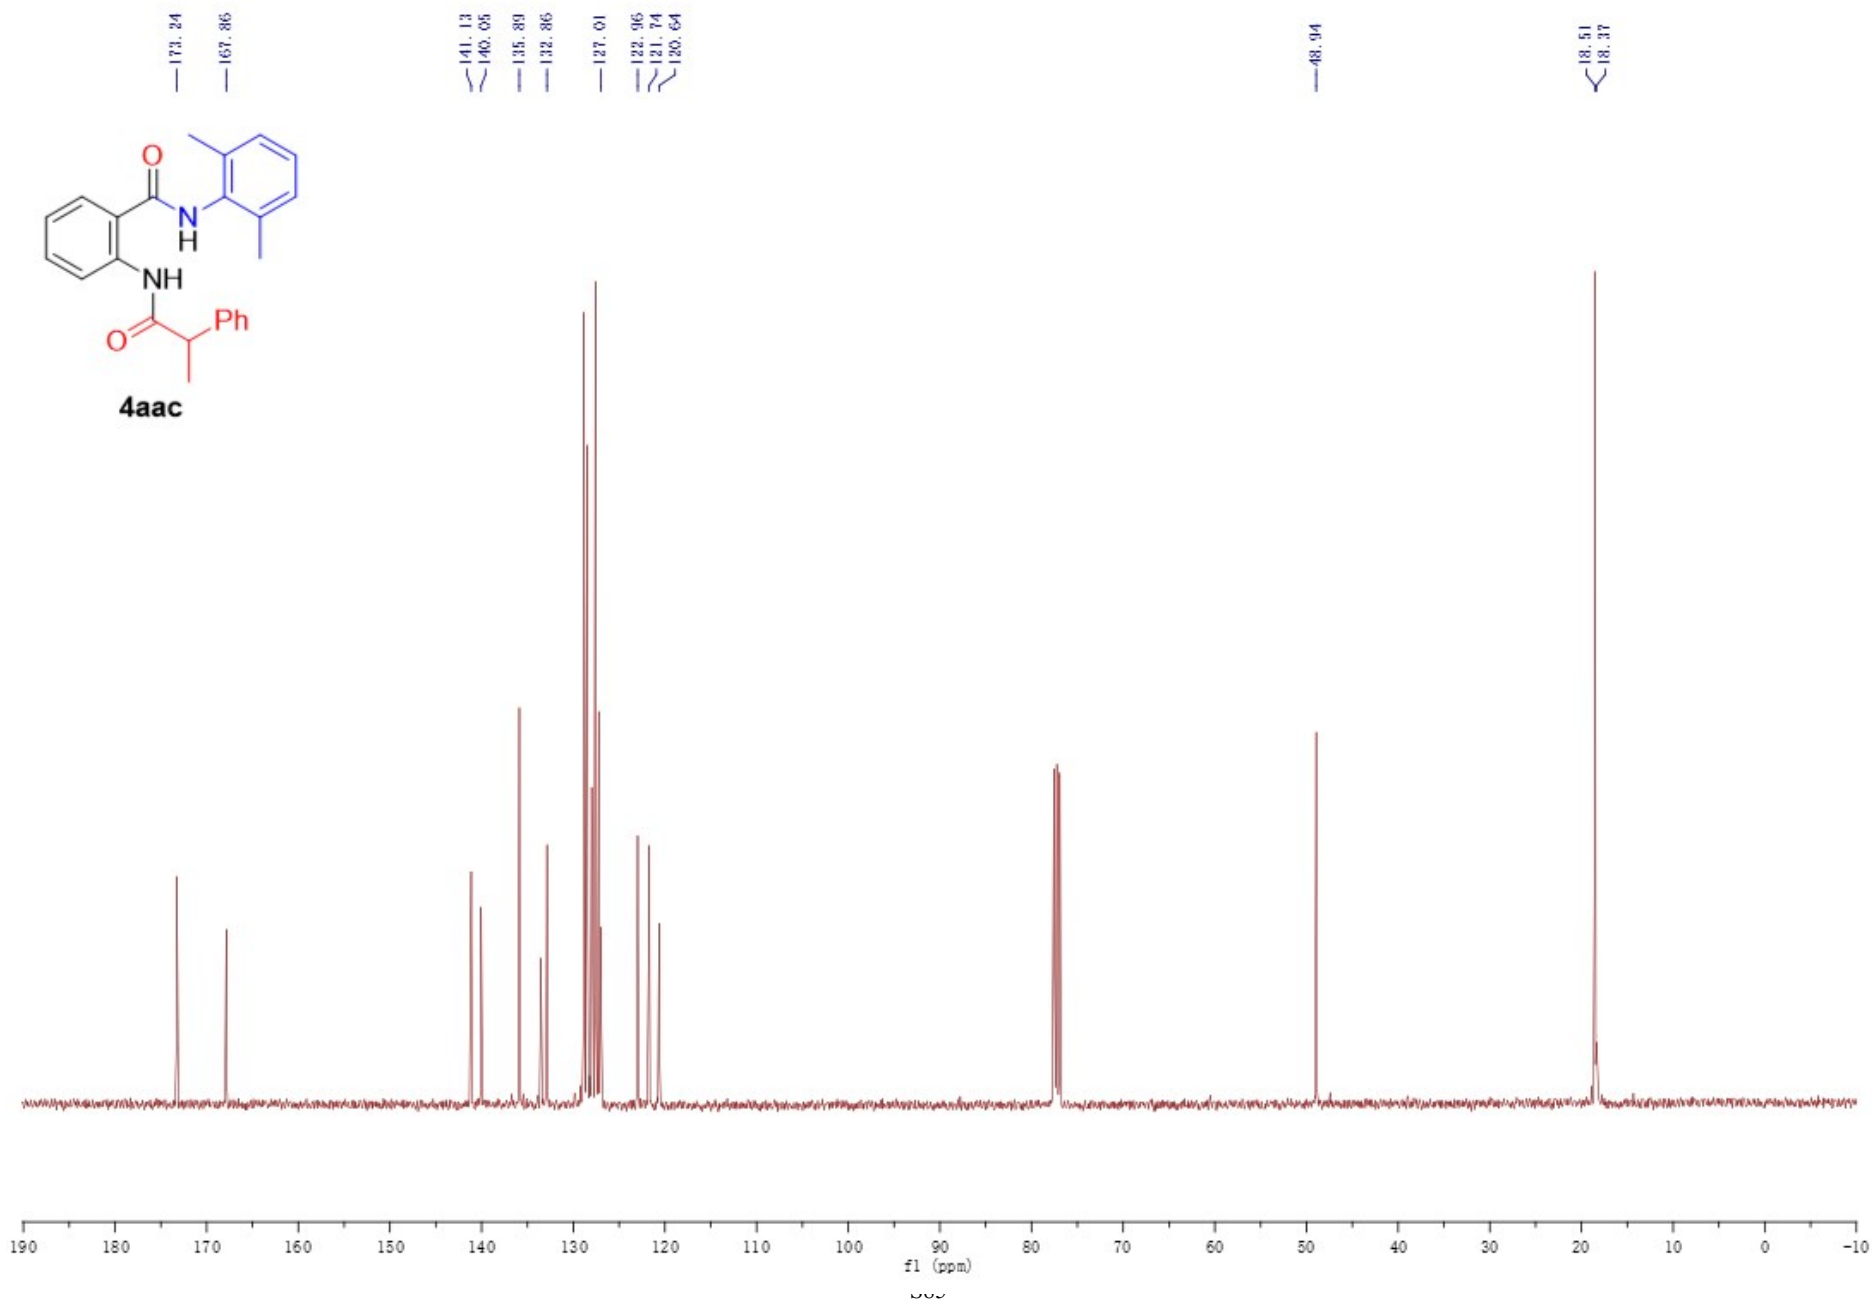

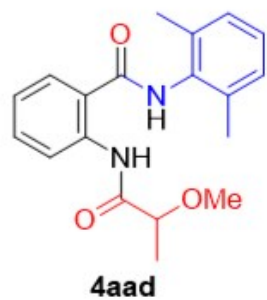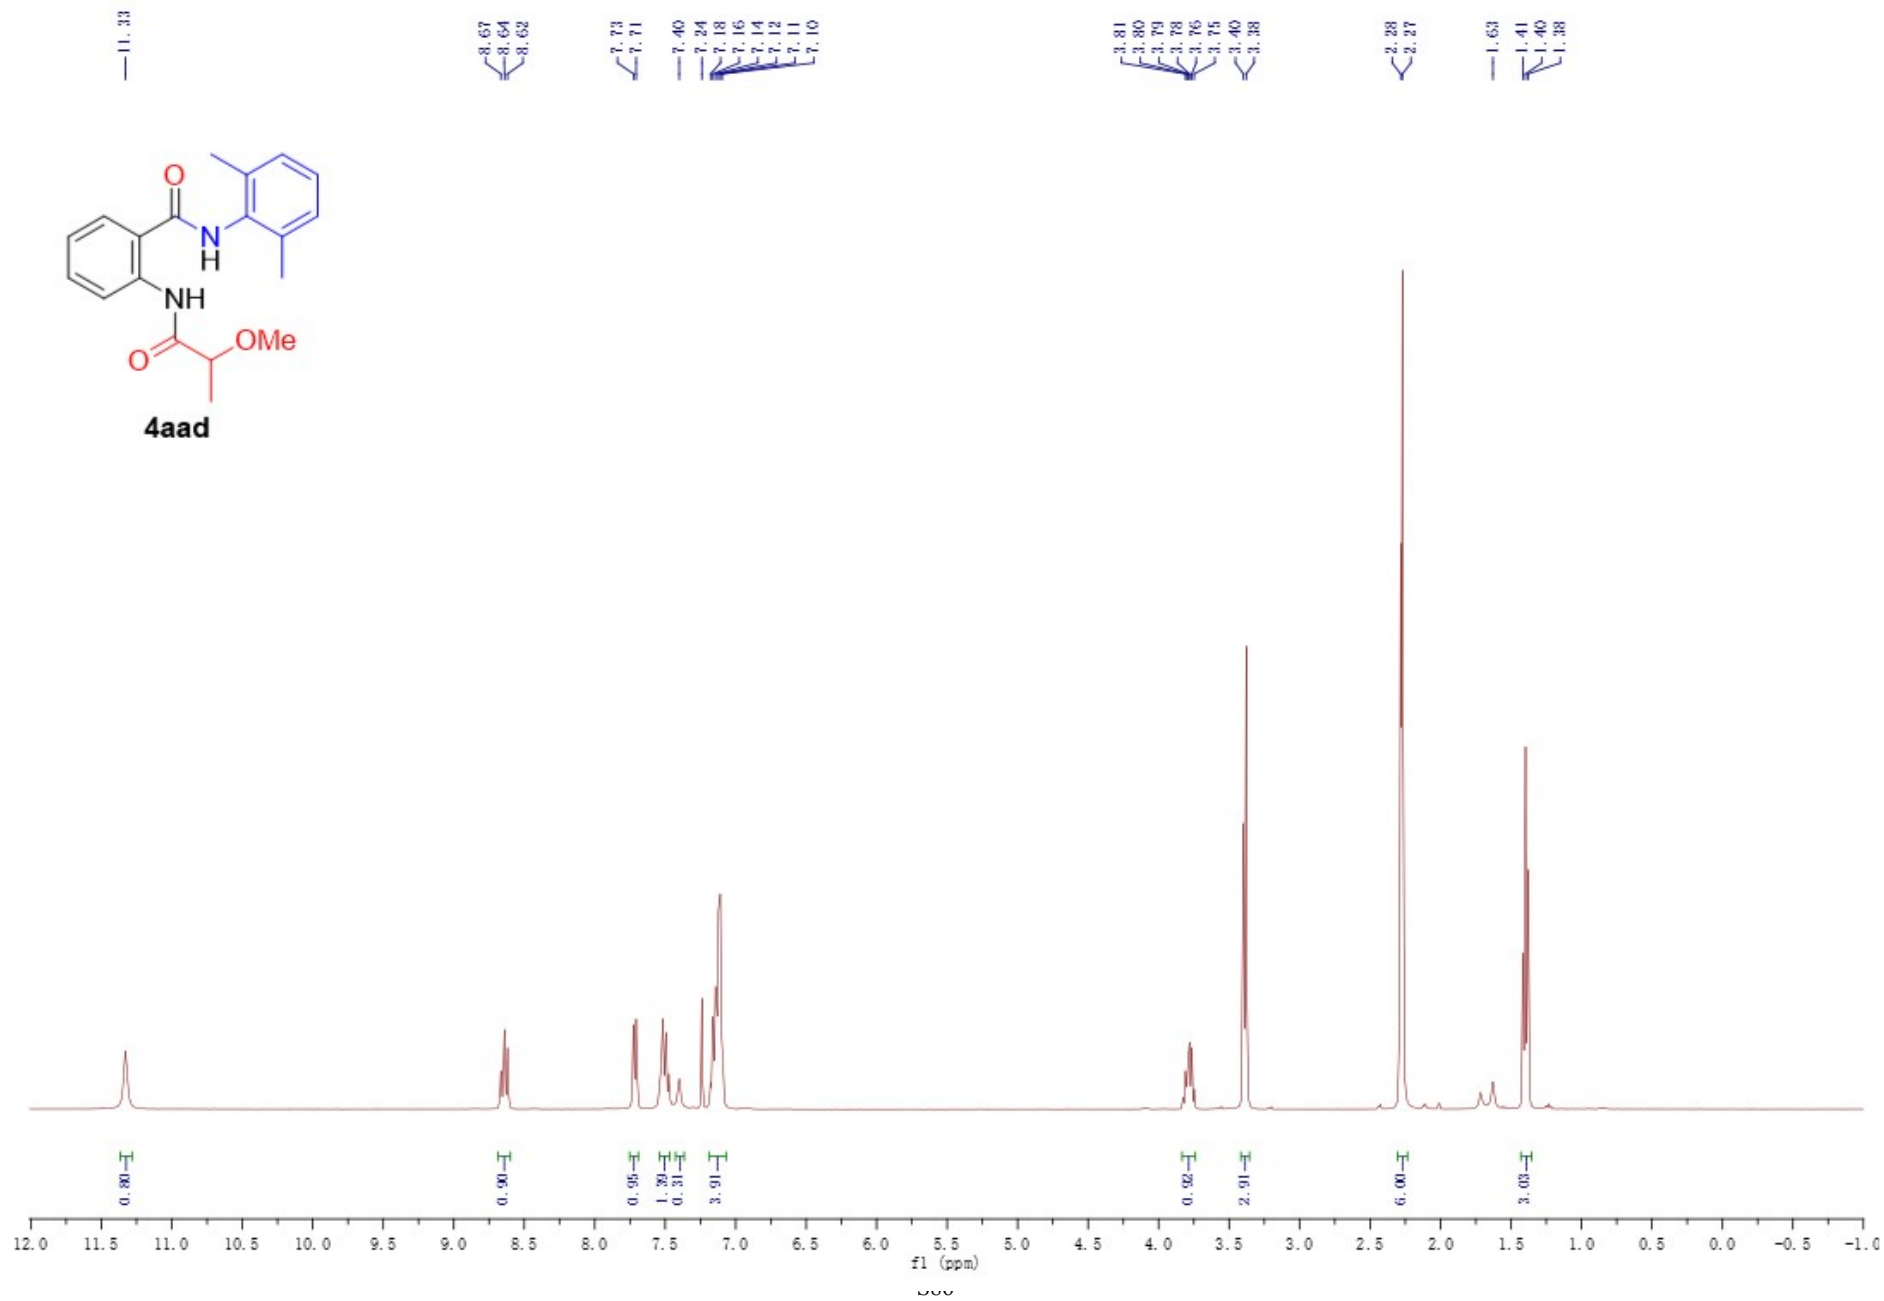

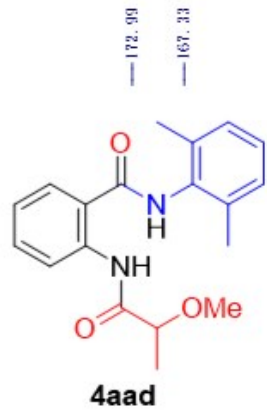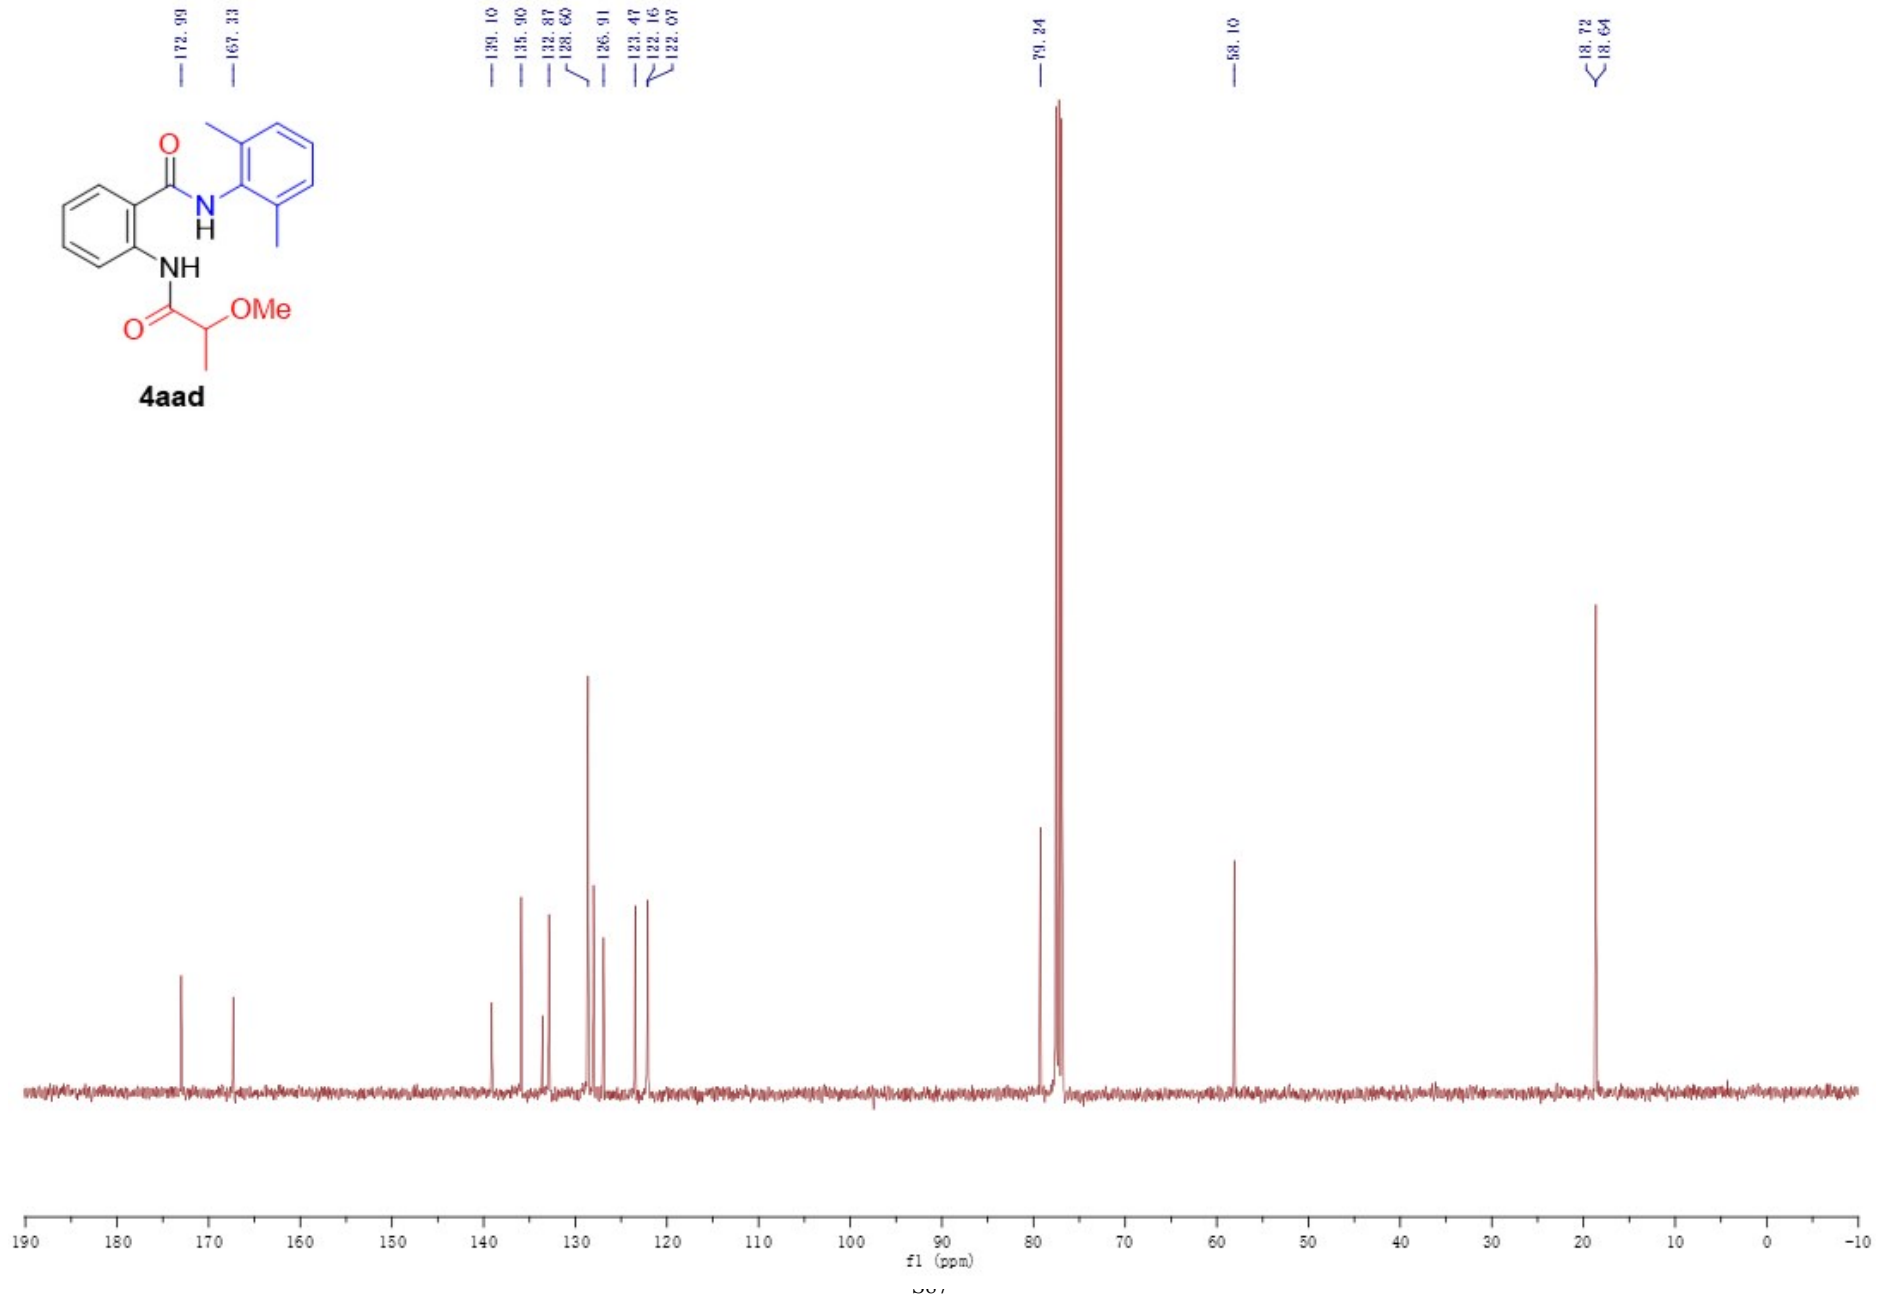

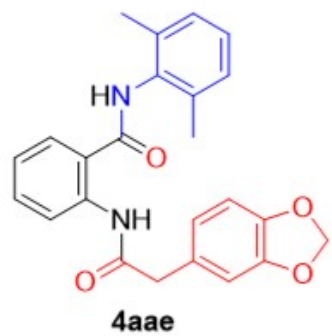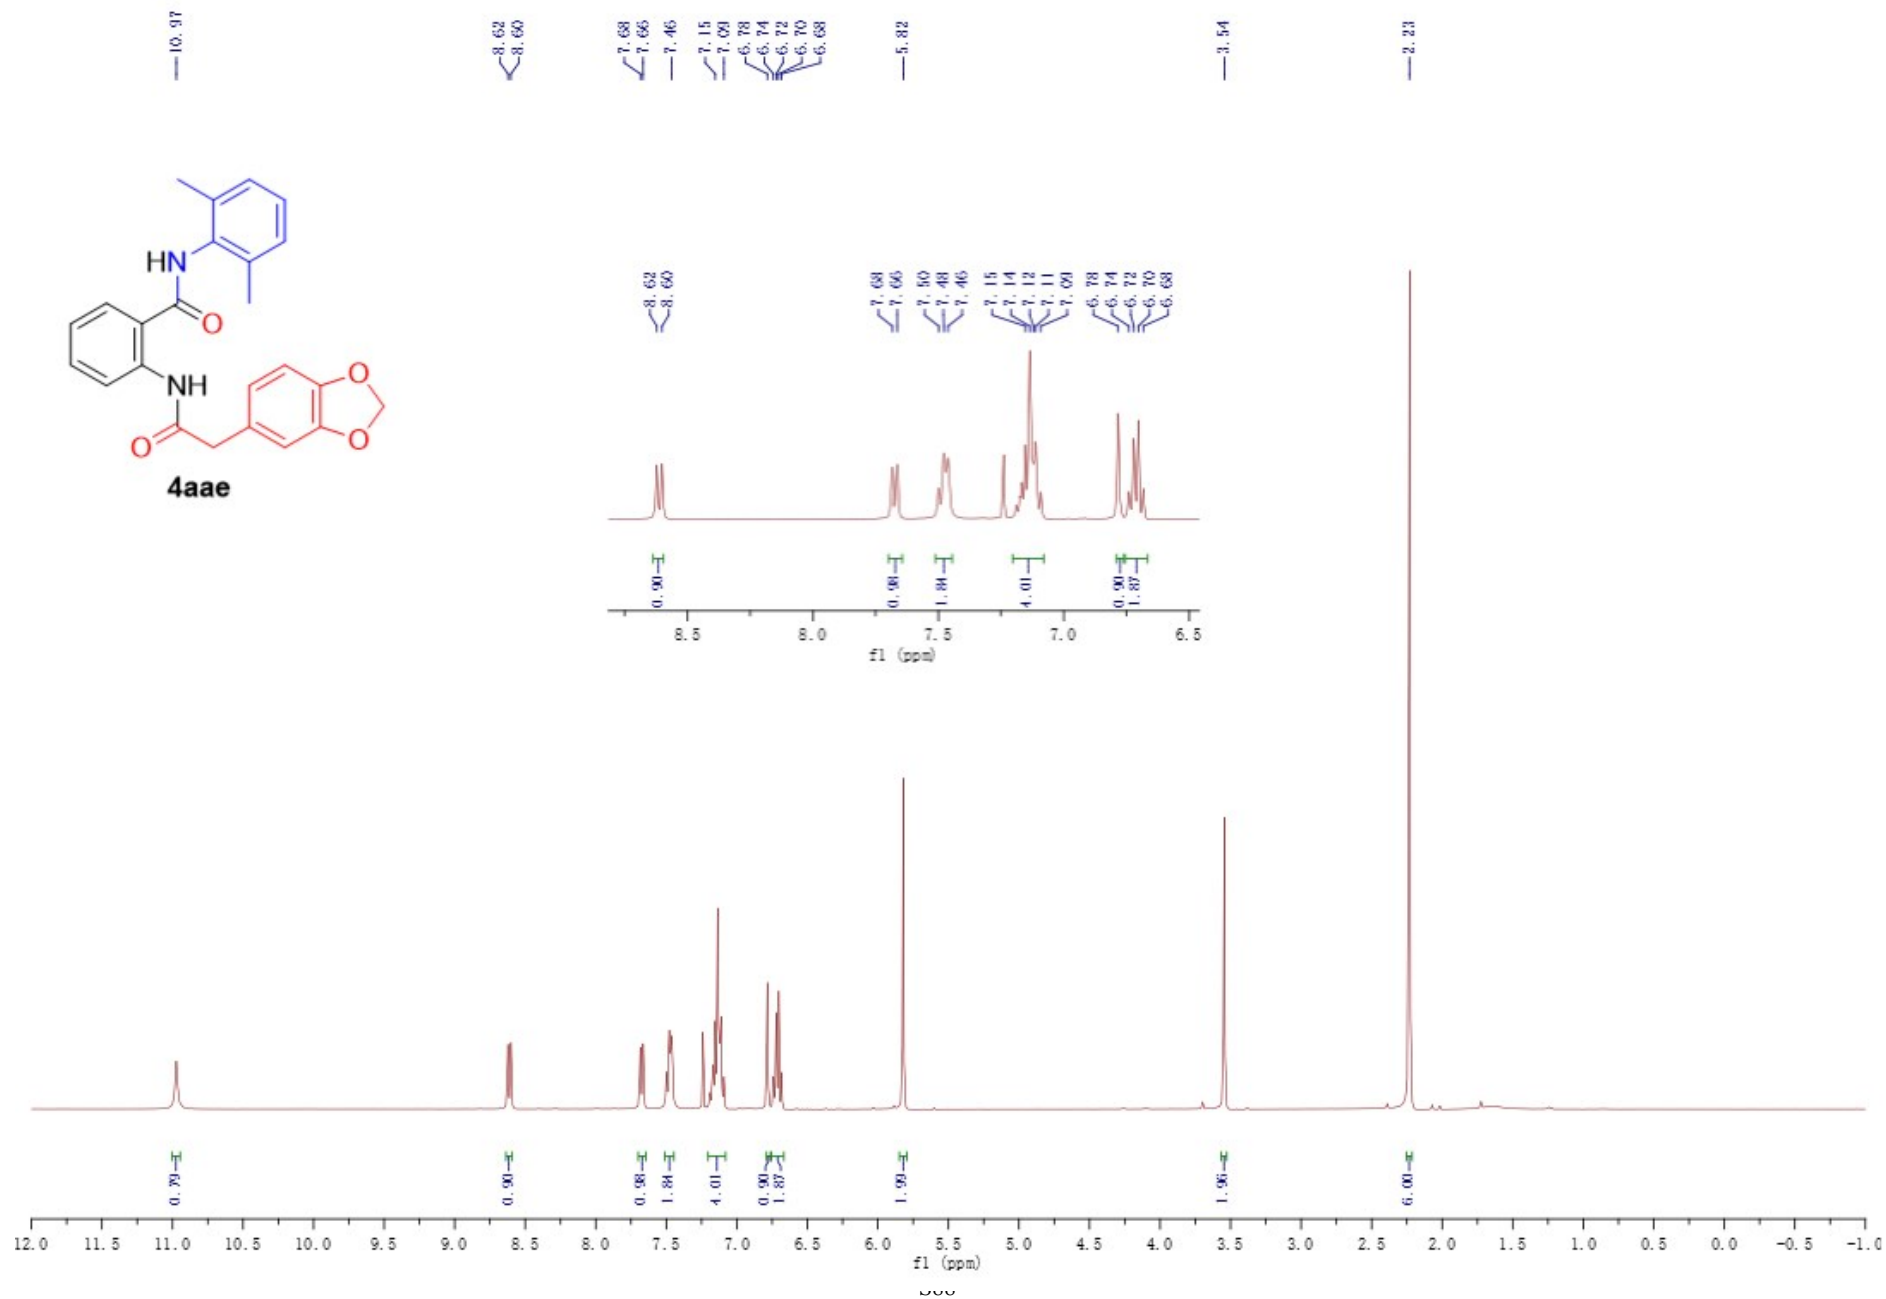



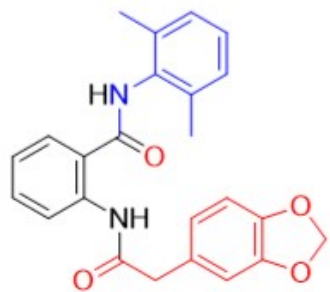

**4aae**

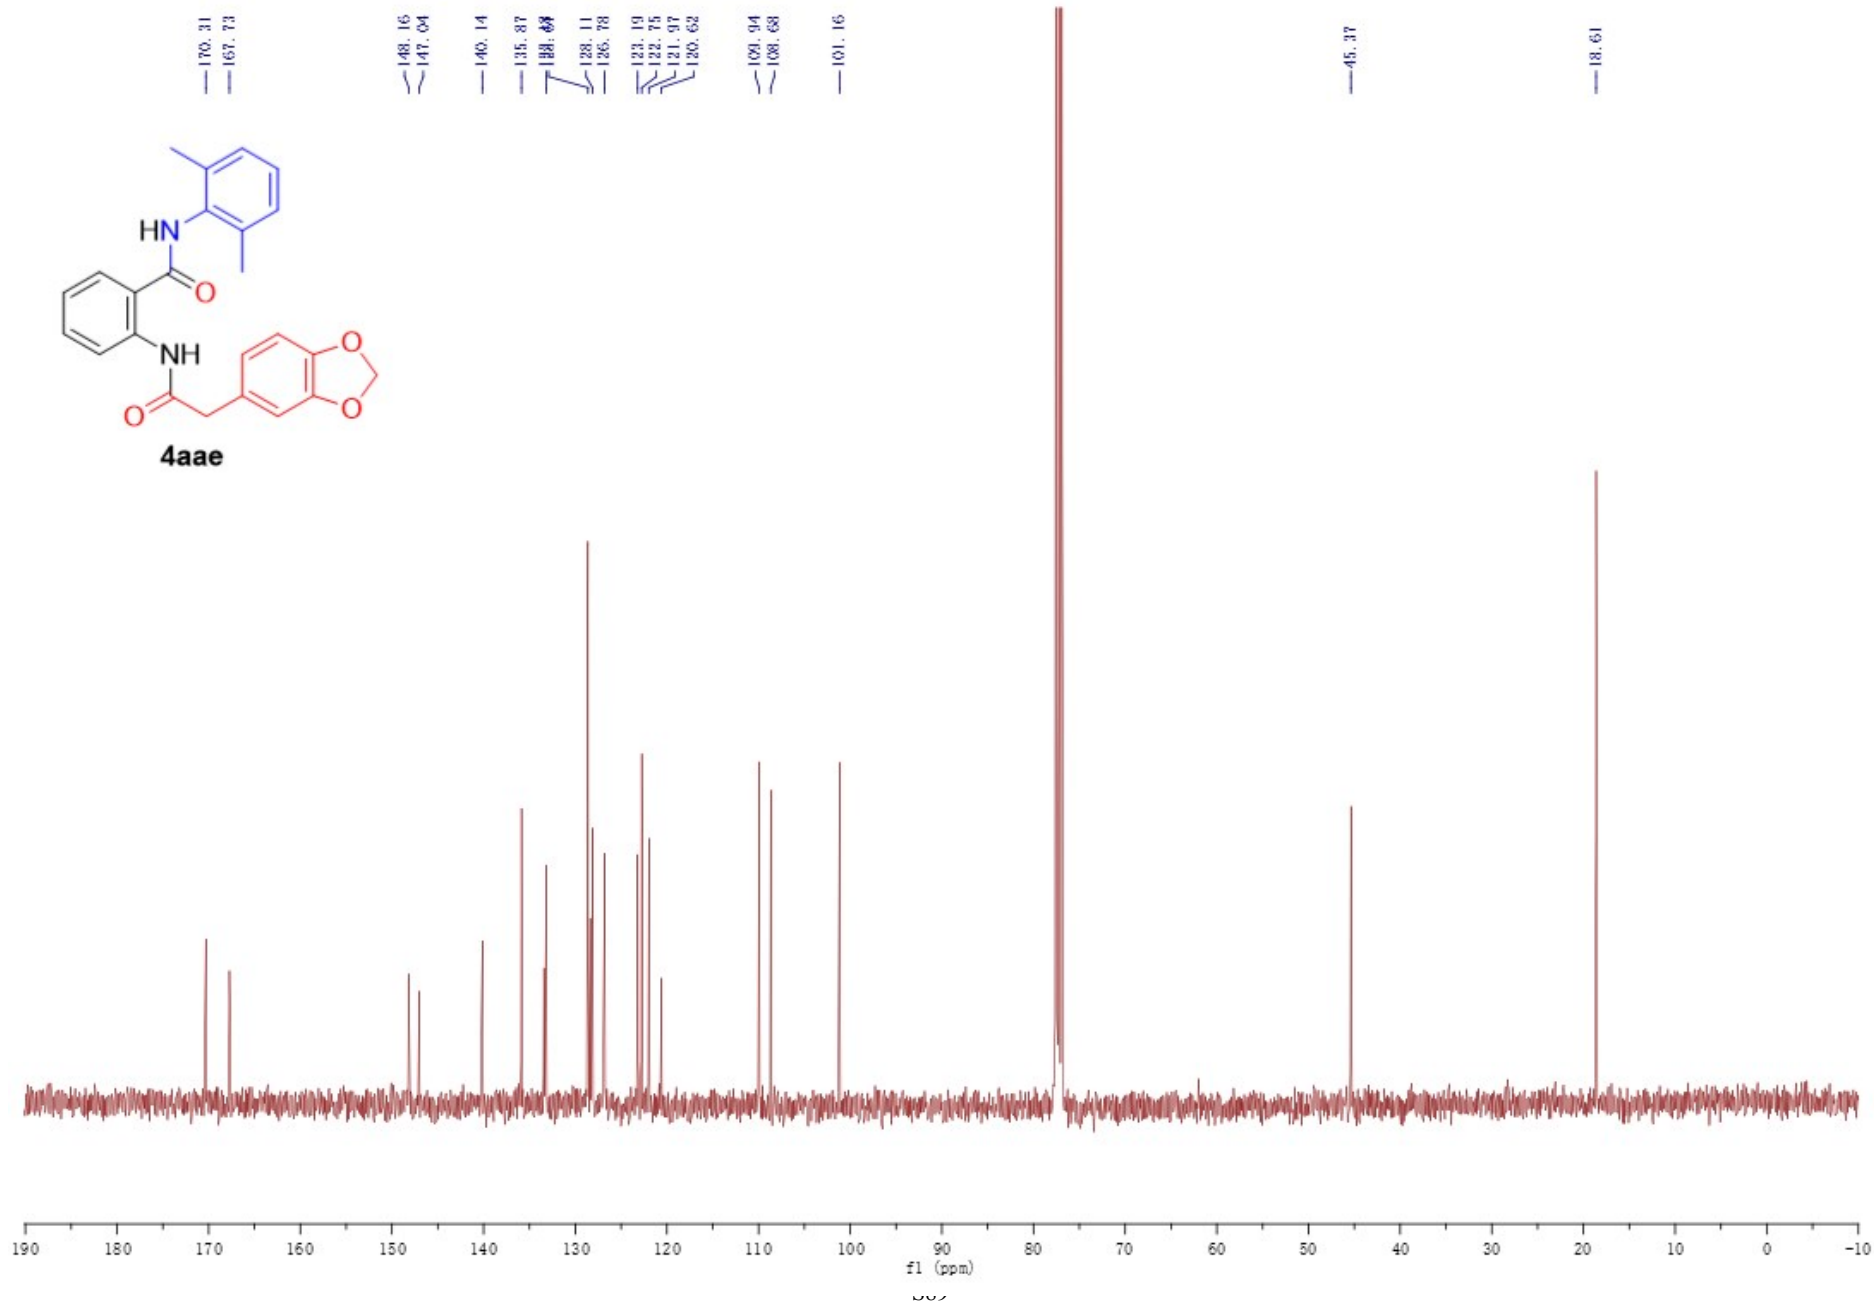



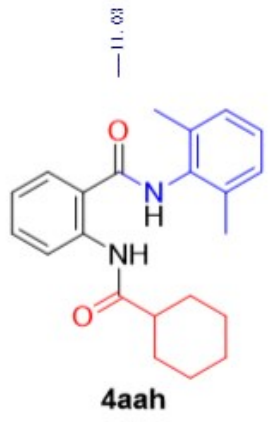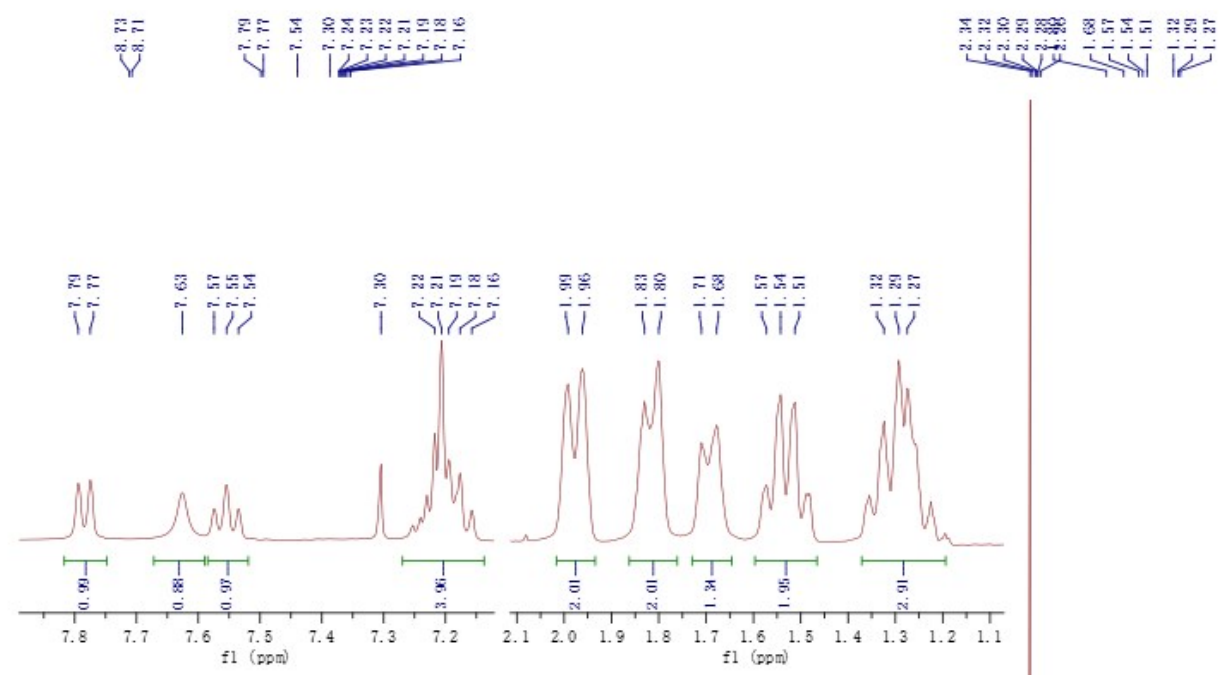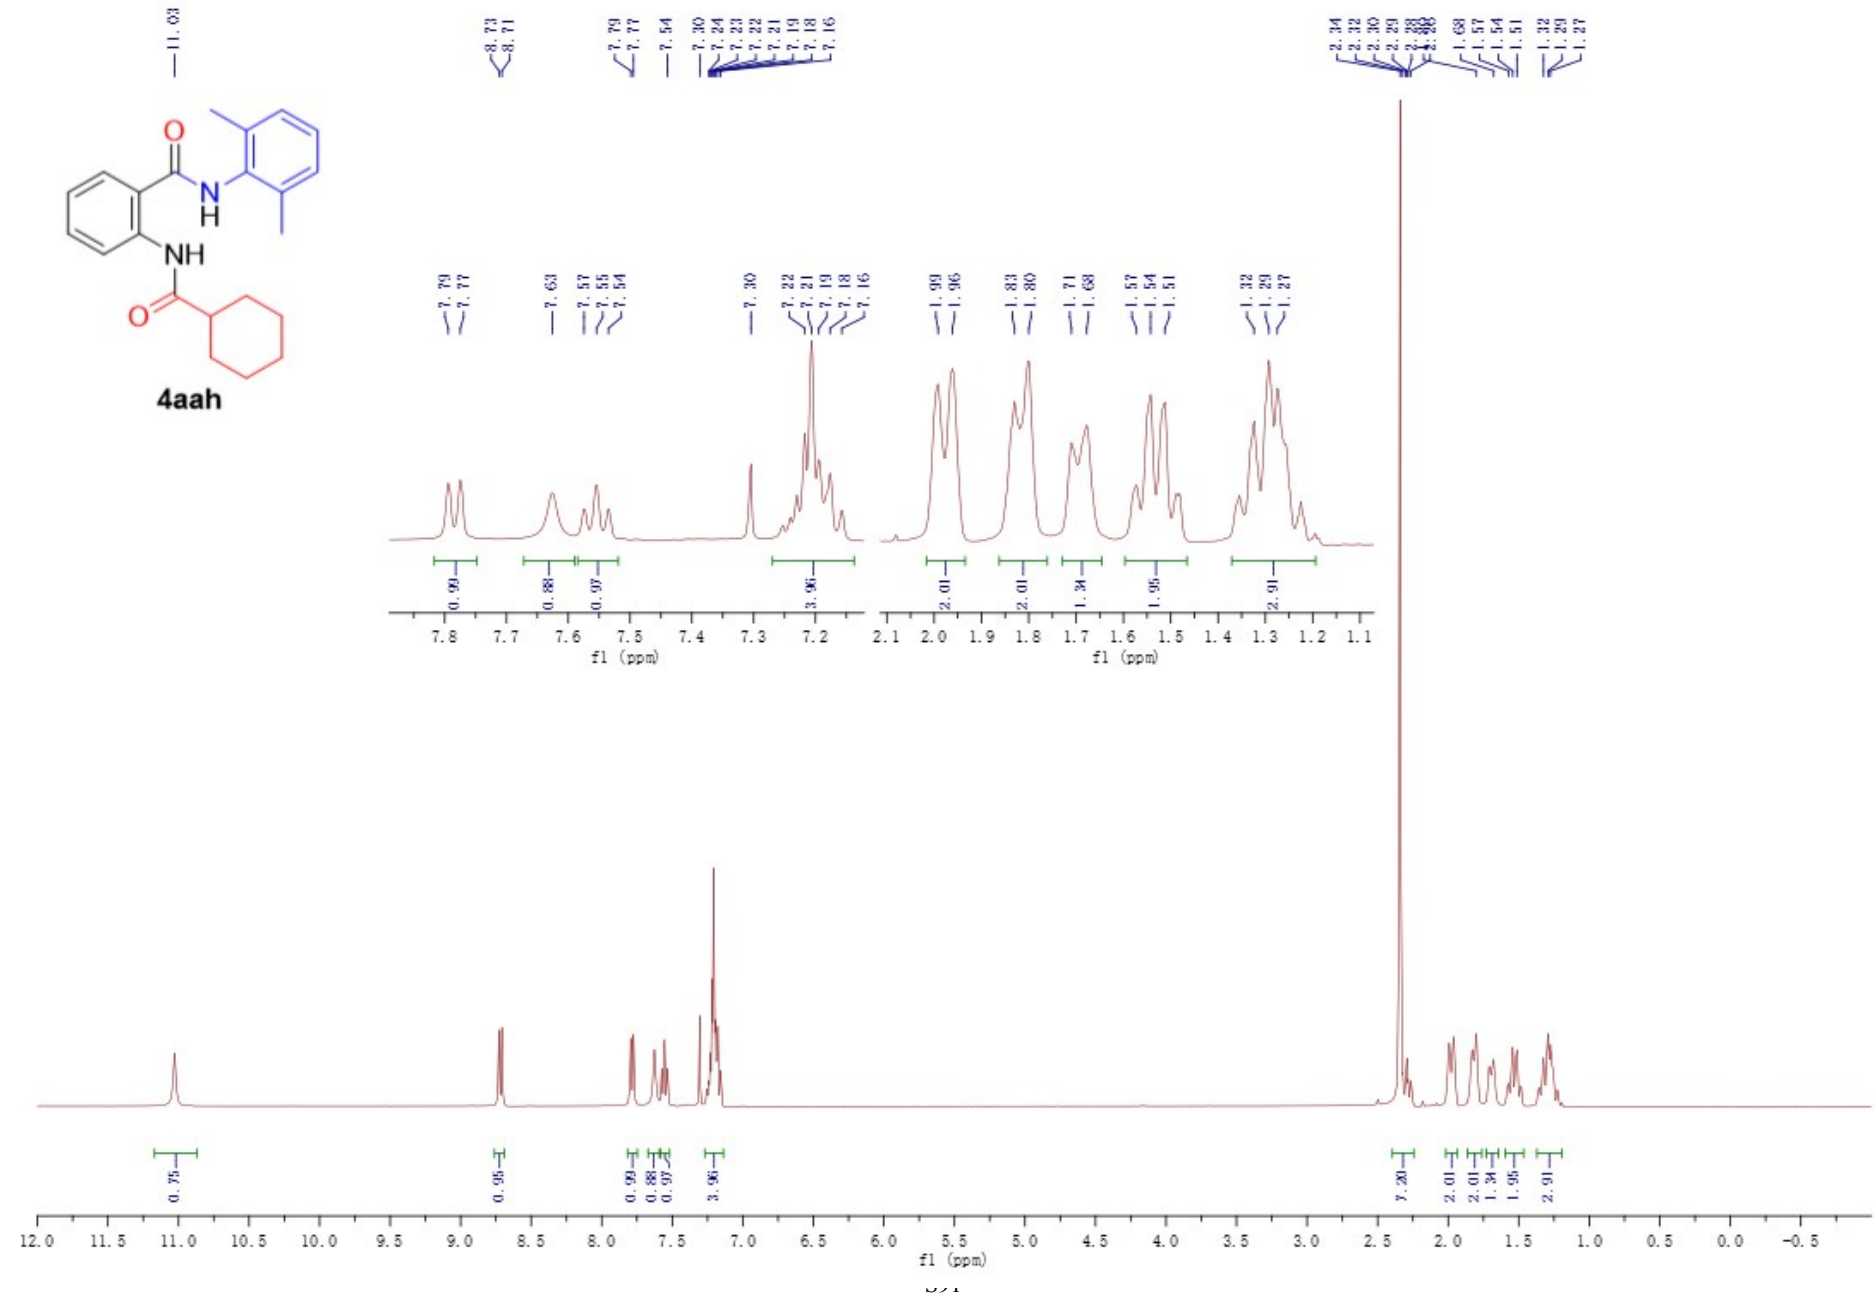

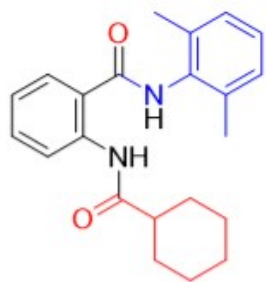

4aah

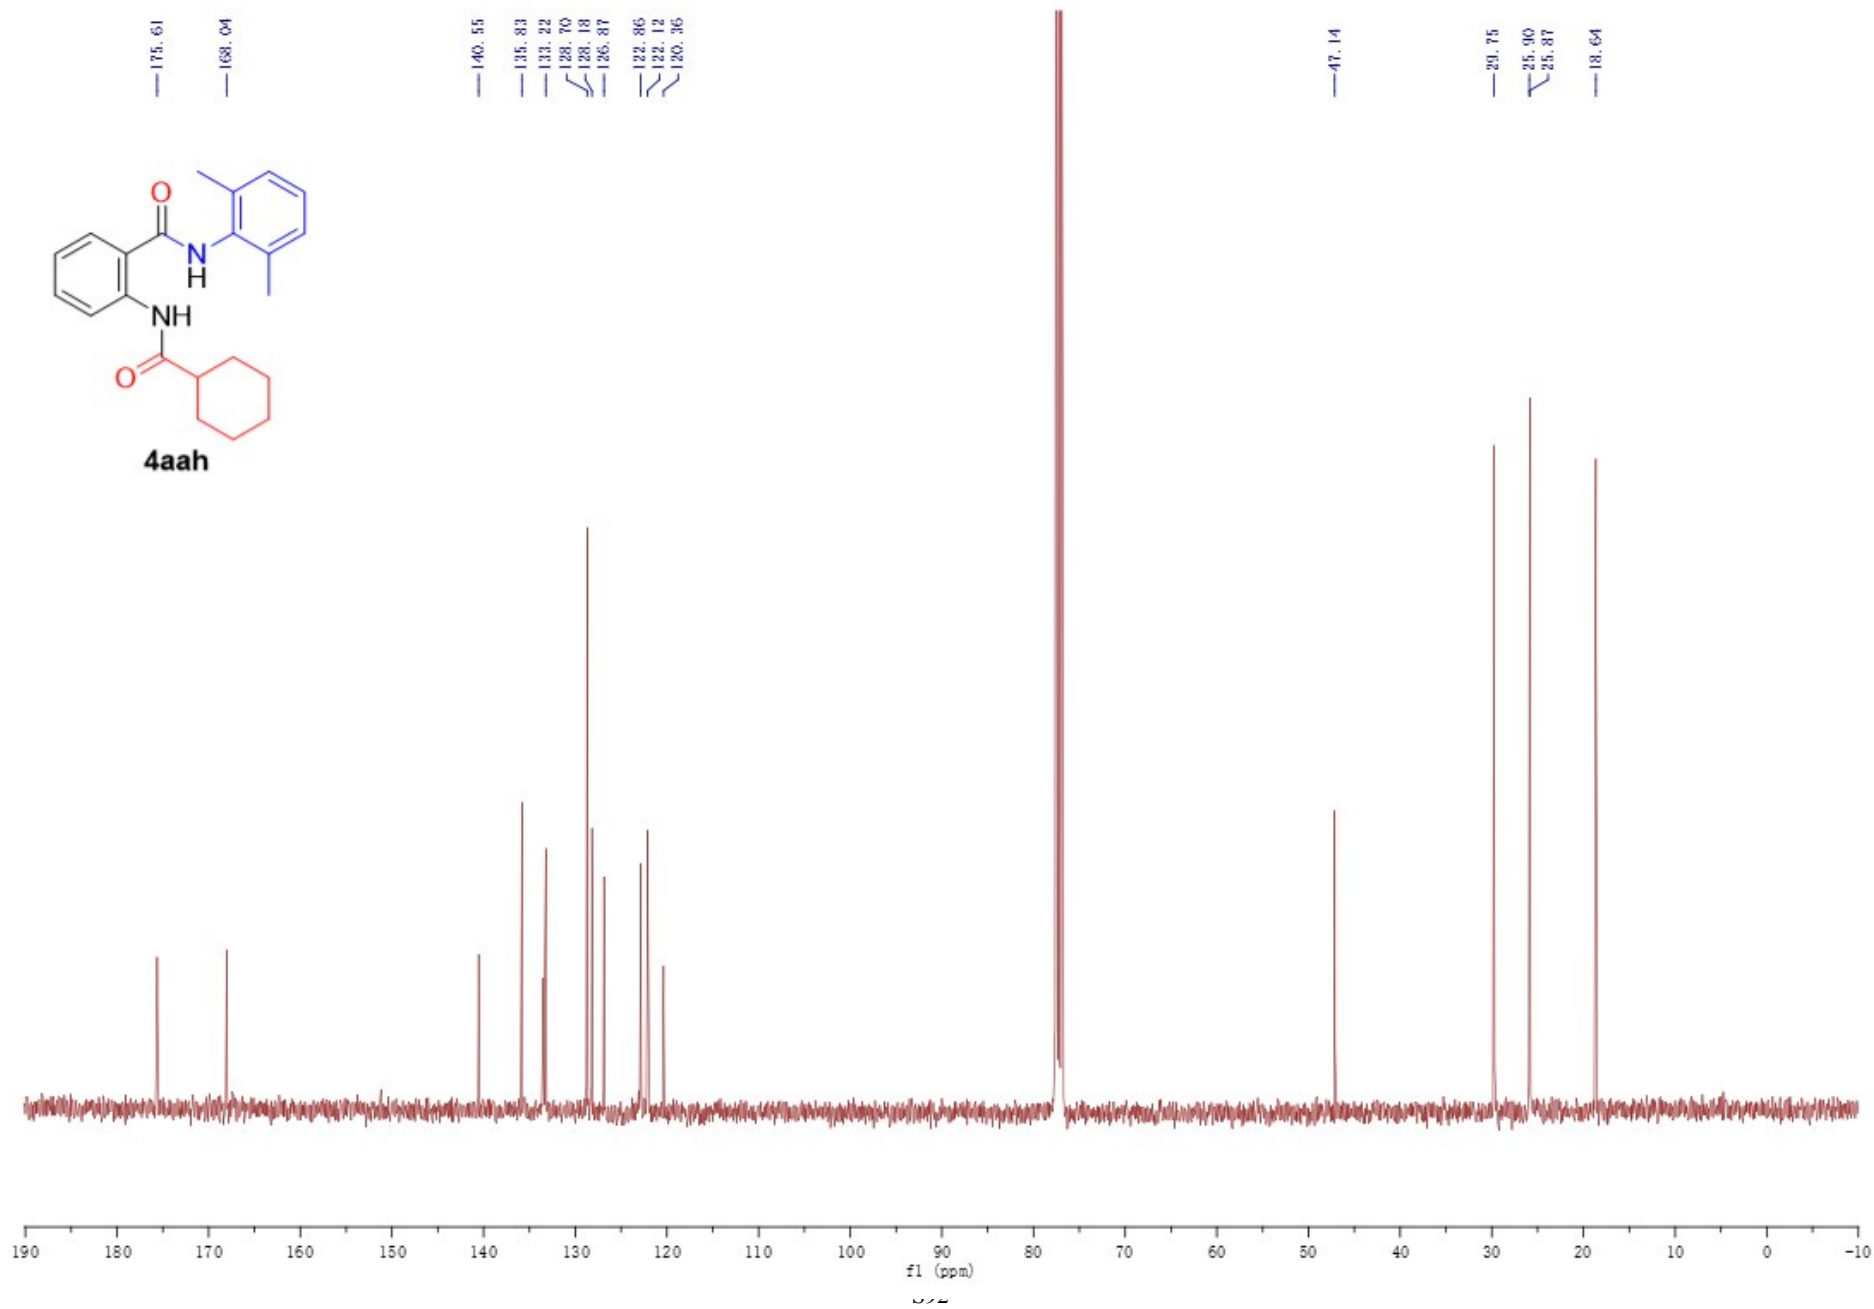

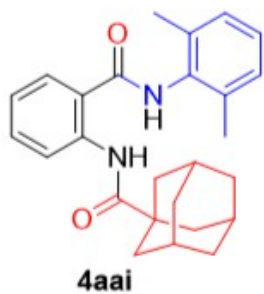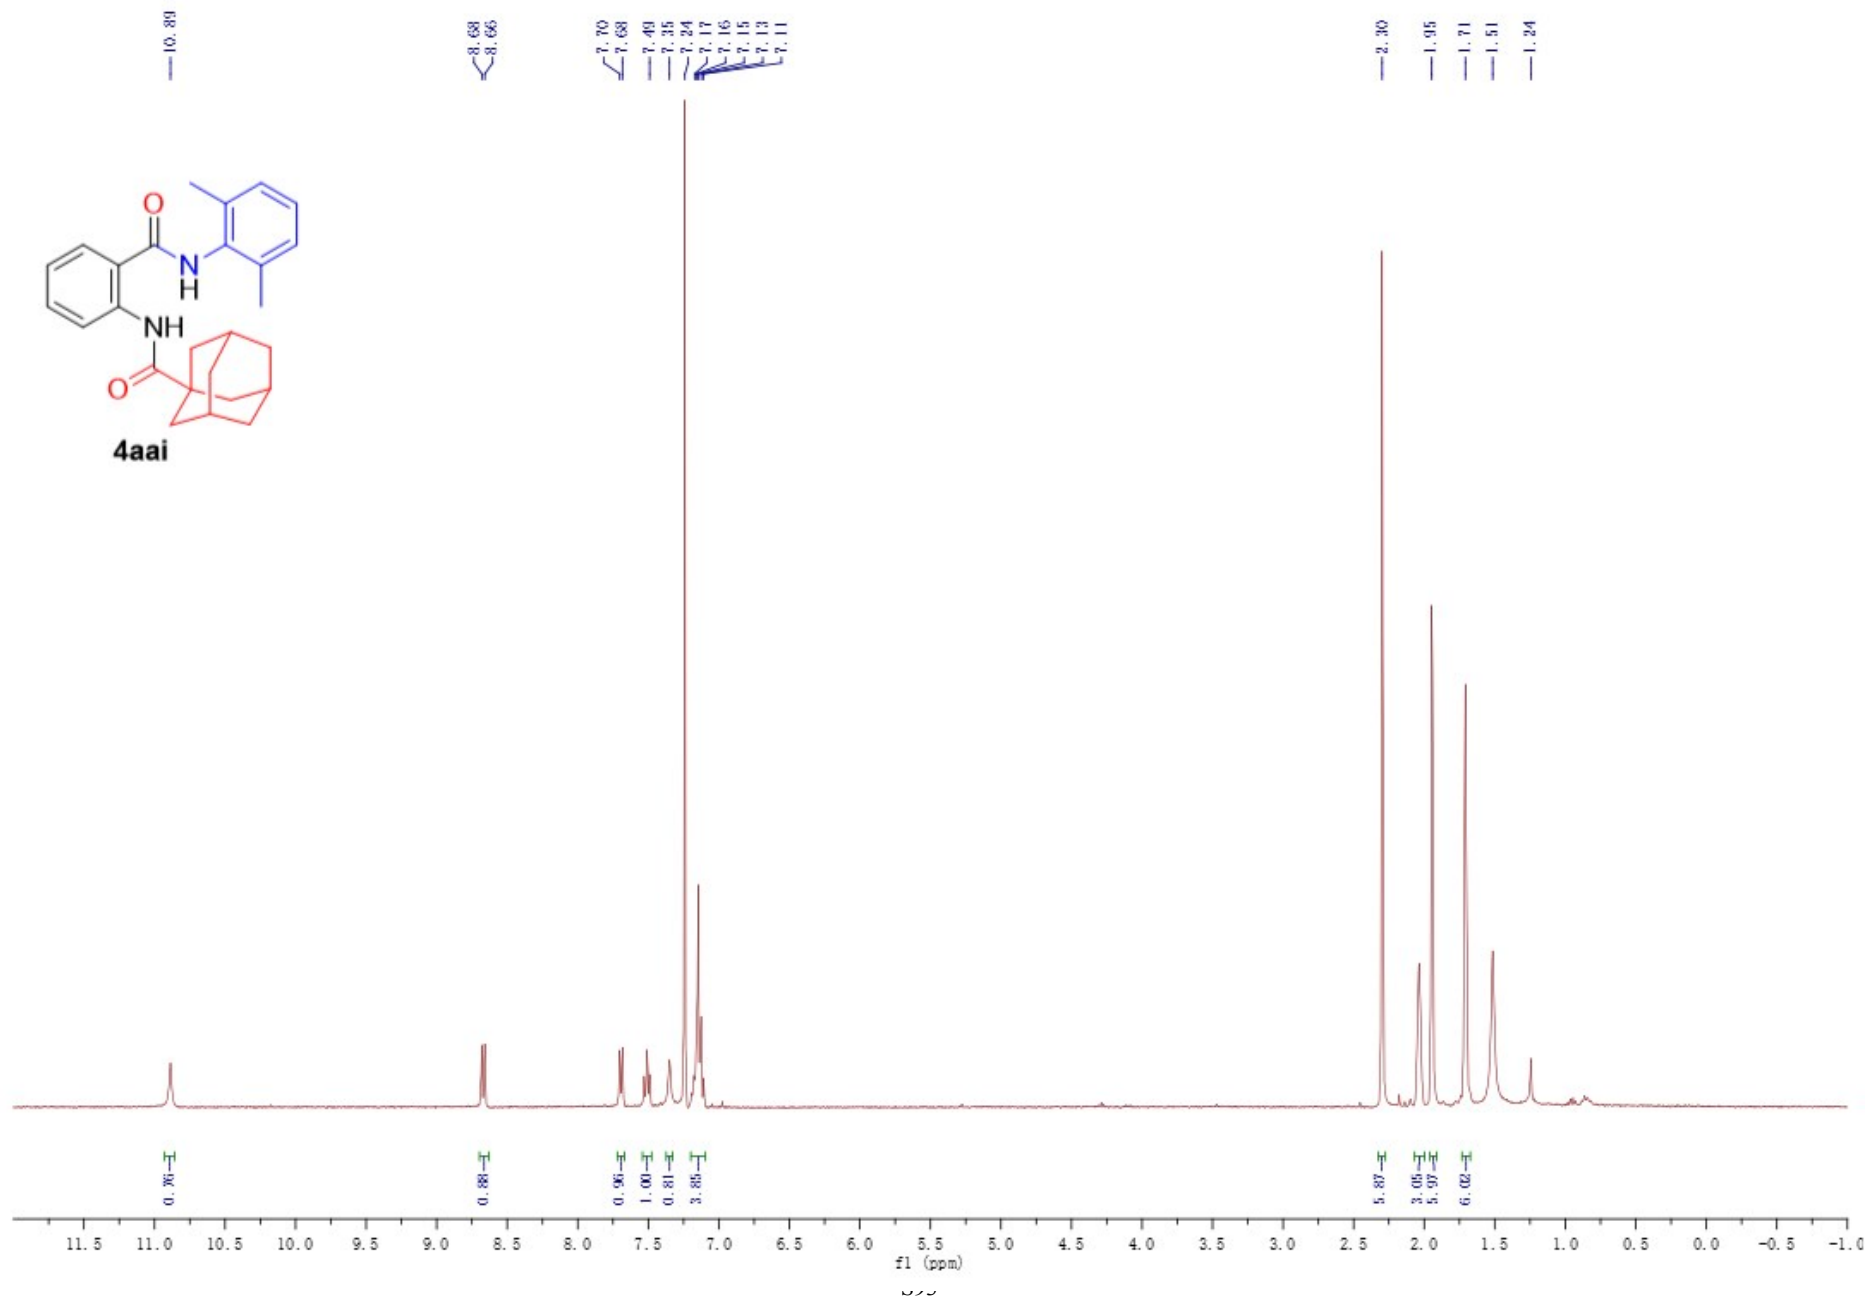

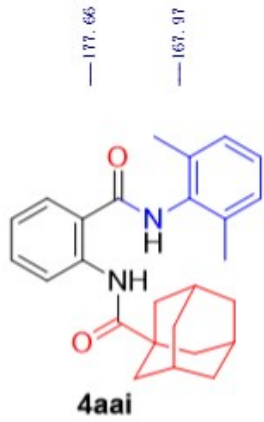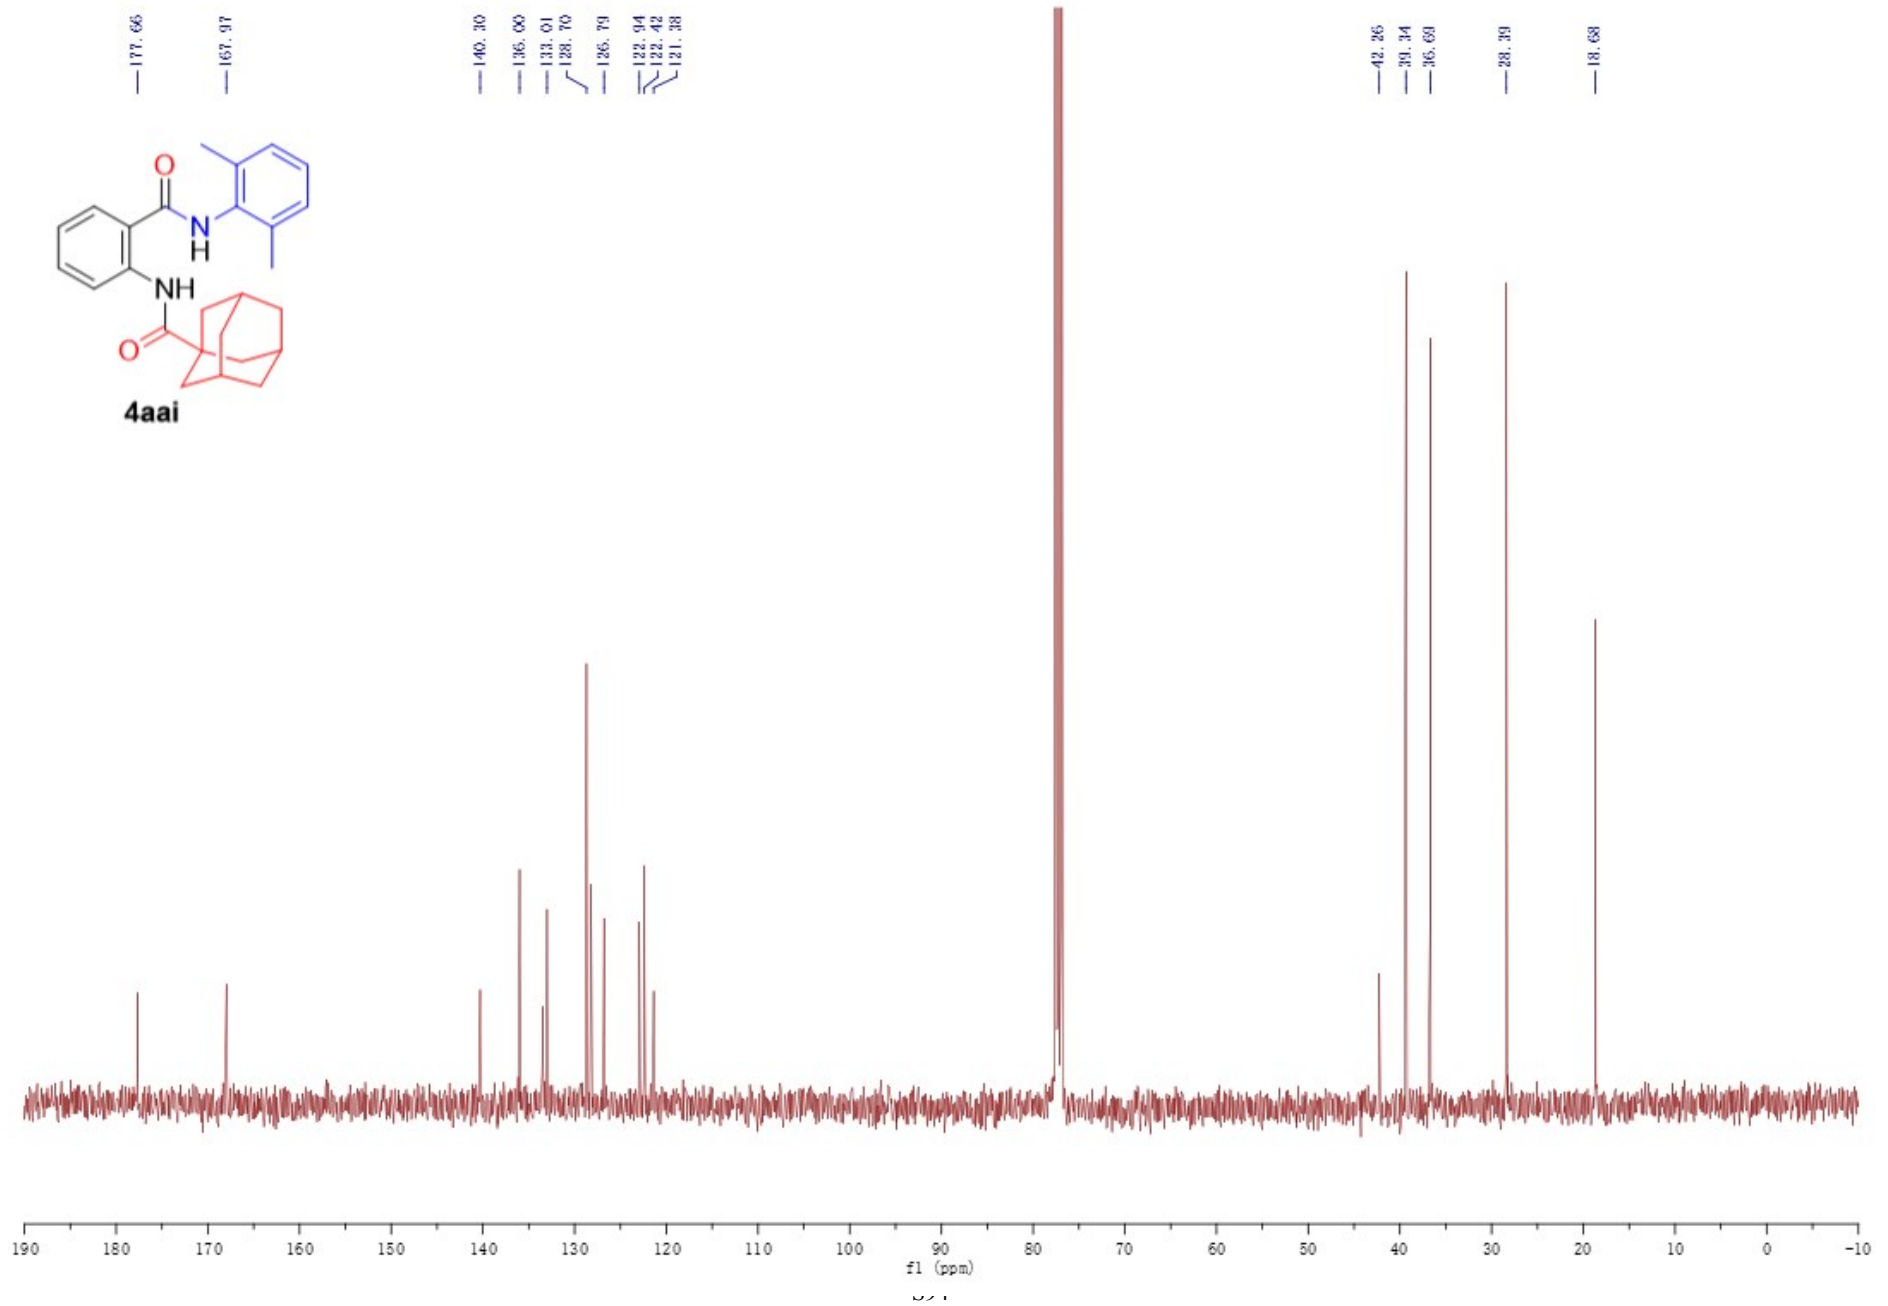

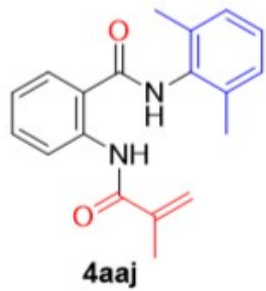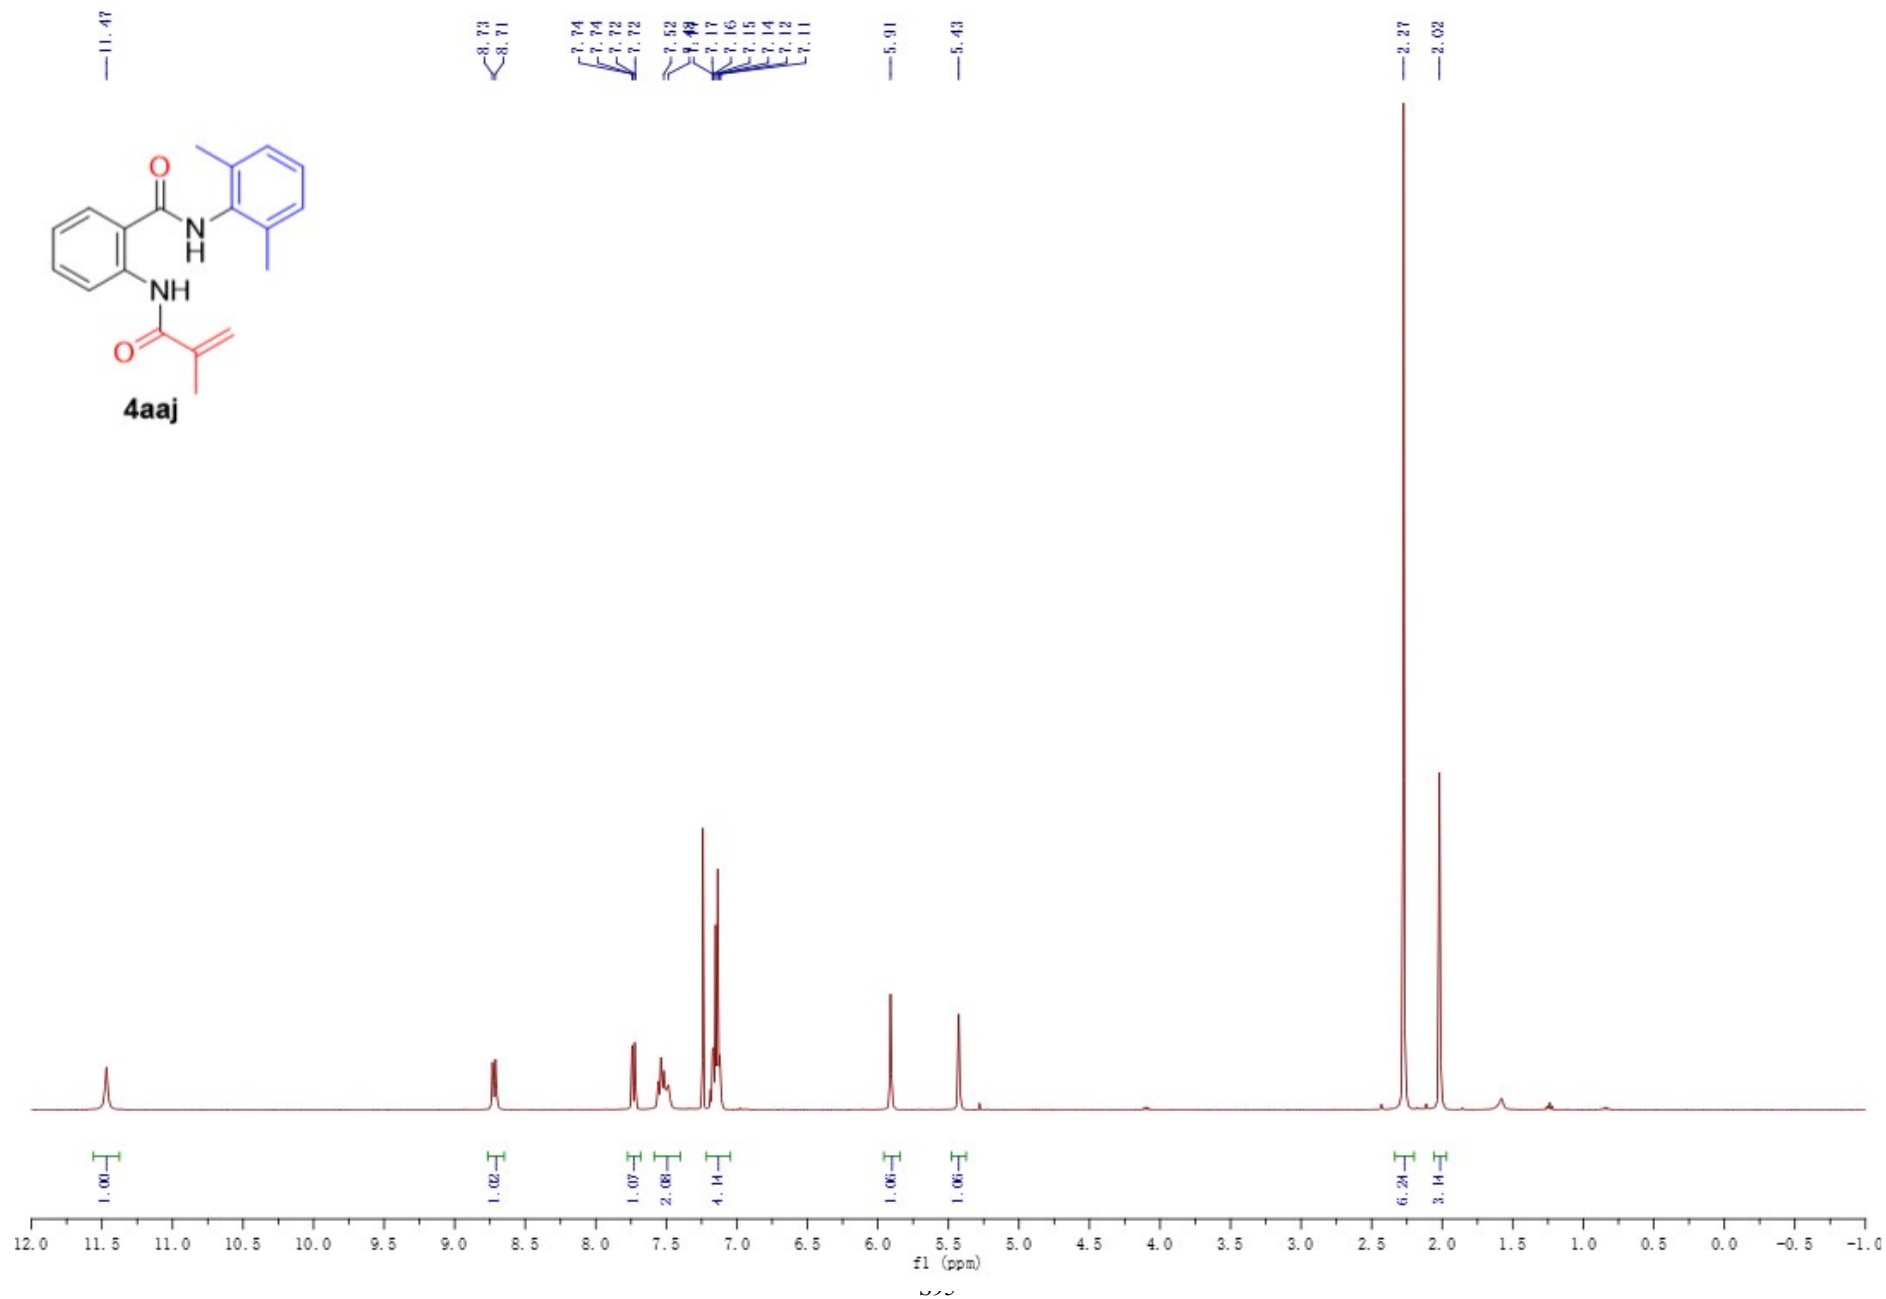

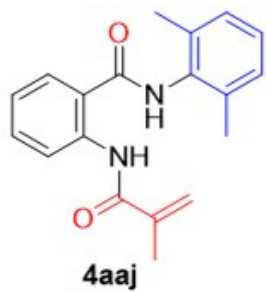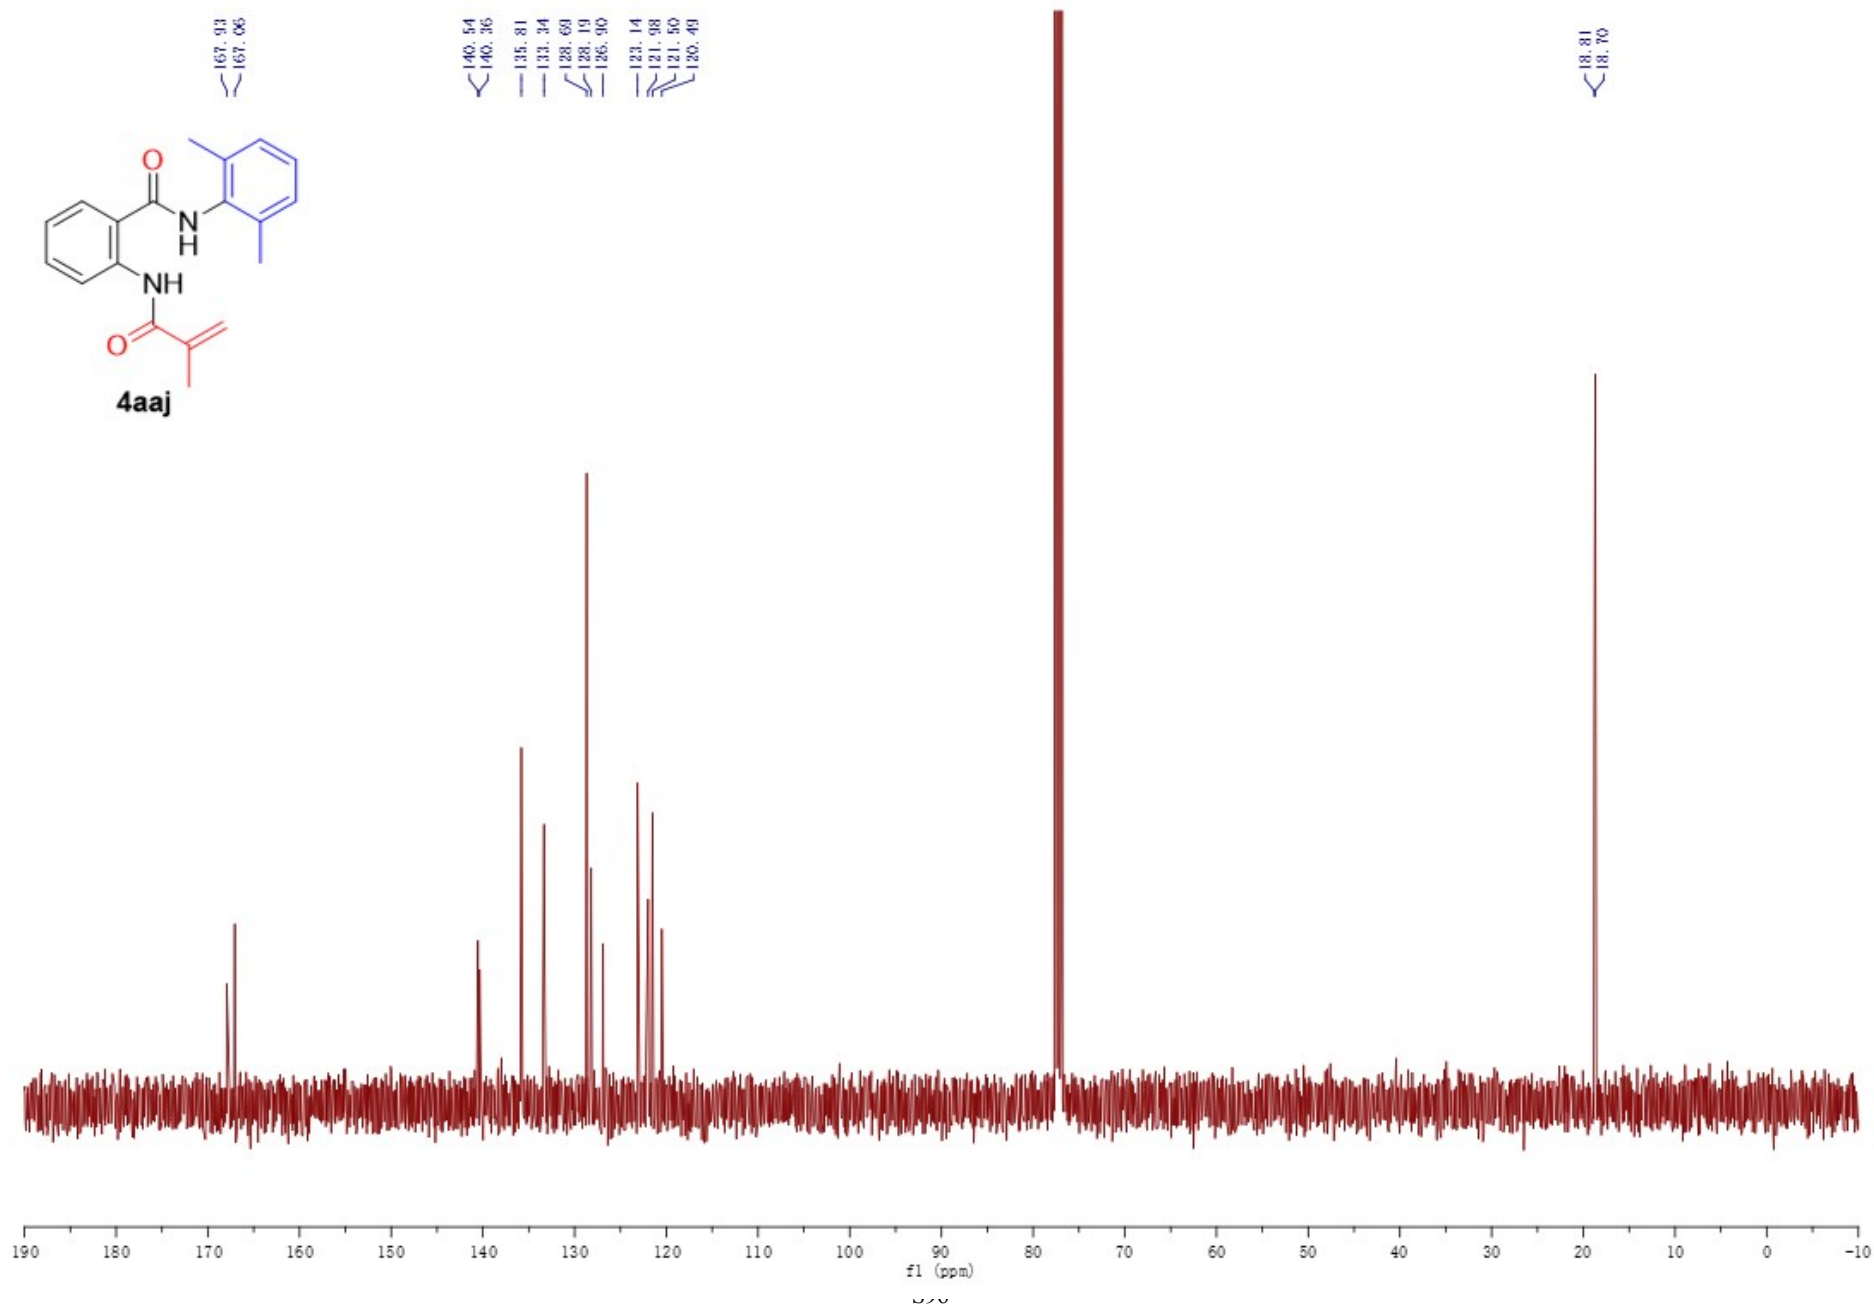



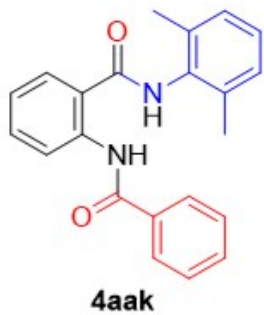

12.00

8.87  
8.85

7.98  
7.96  
7.77  
7.49  
7.24  
7.20  
7.19  
7.18  
7.16  
7.15  
7.13  
7.12

2.28

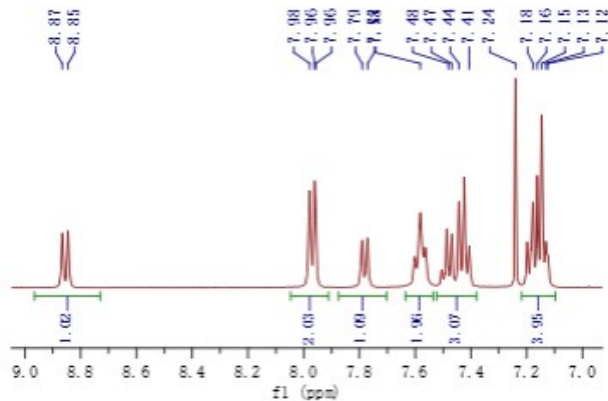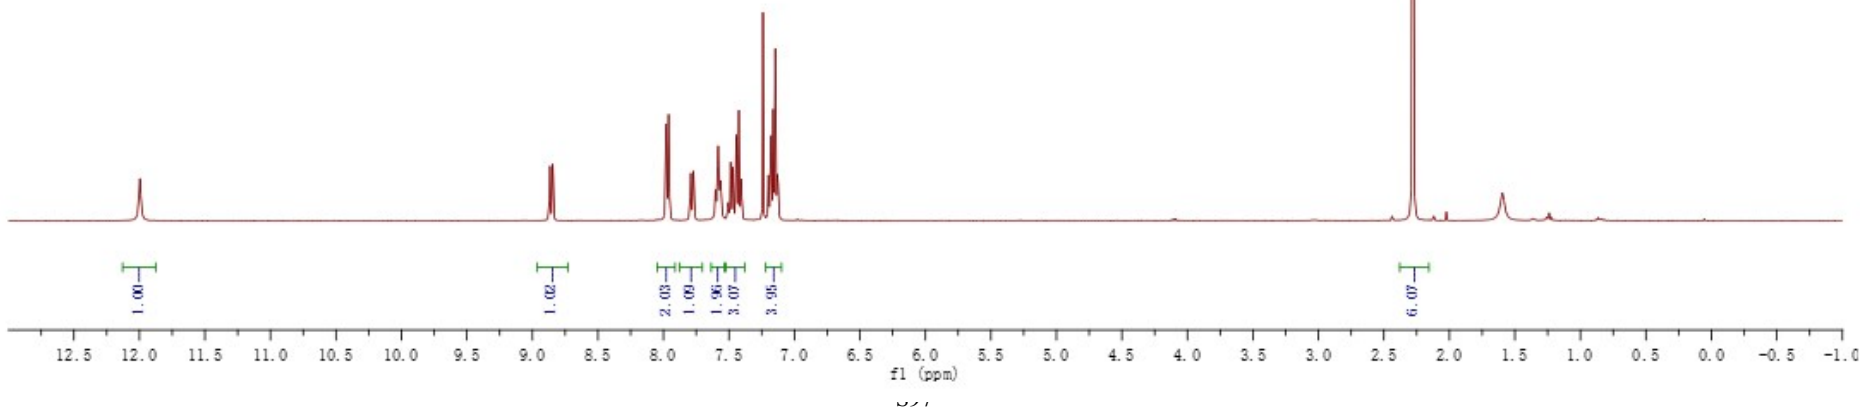

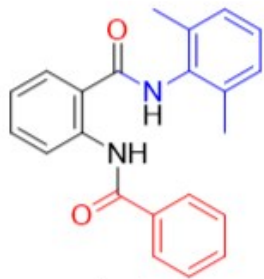

4aak

168.12  
165.90

148.88  
133.46  
133.36  
132.08  
127.01  
123.24  
122.14  
120.44

18.71

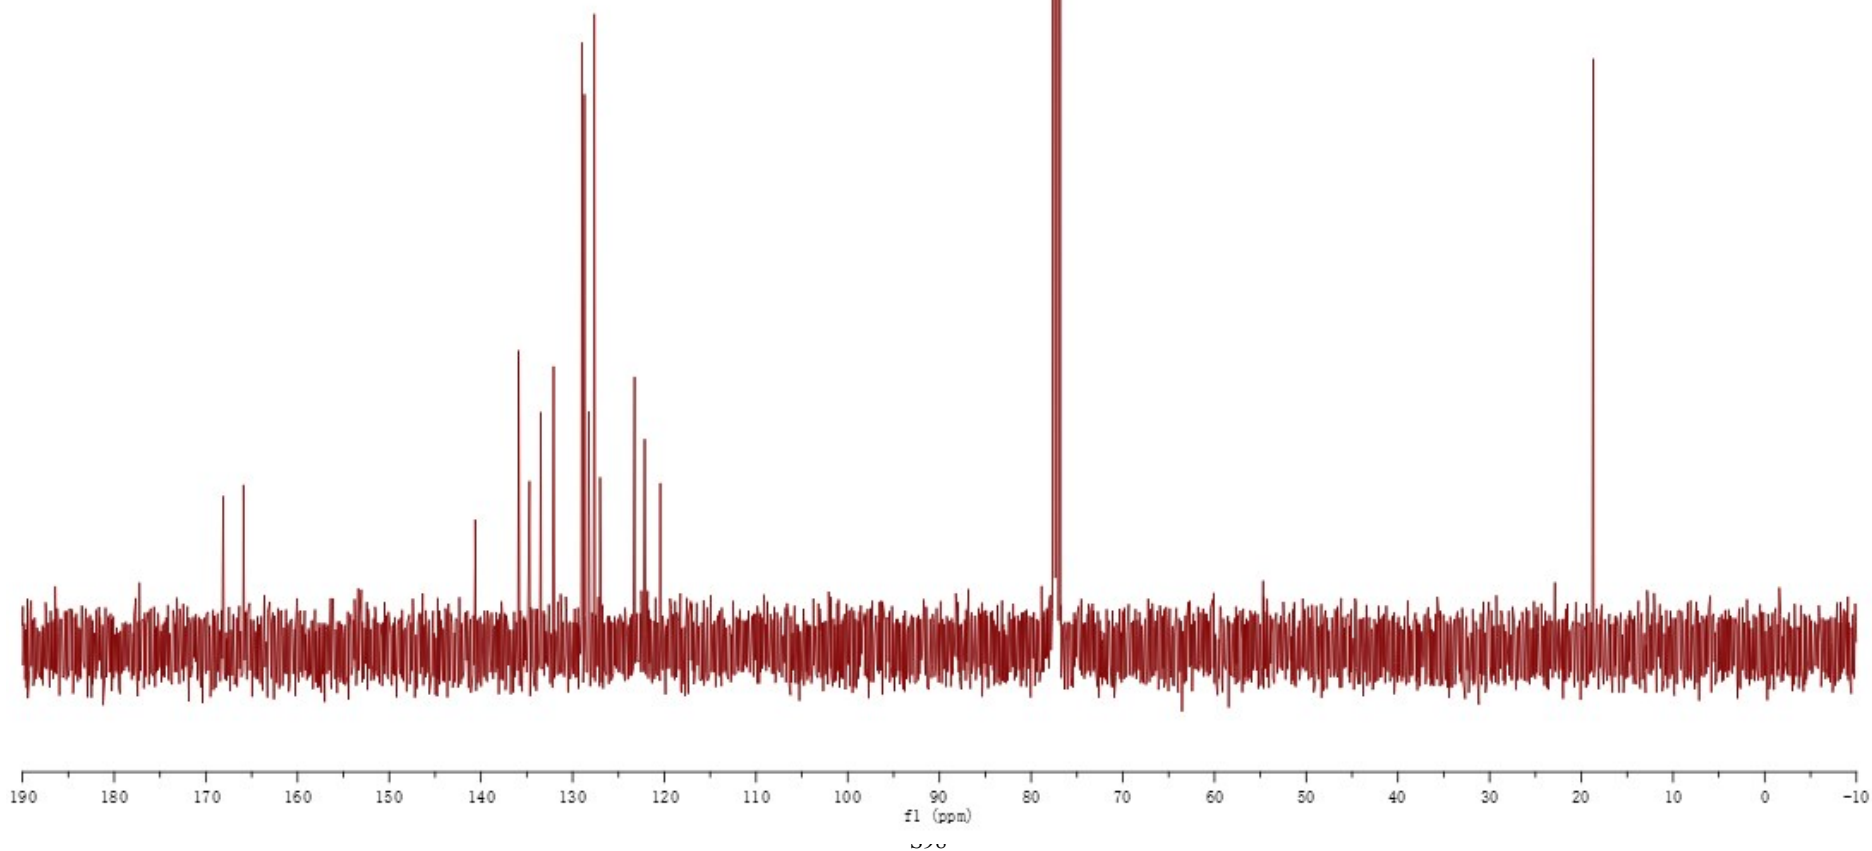

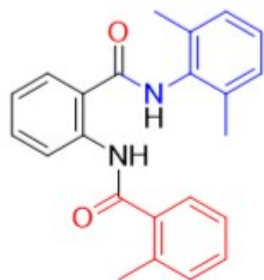

**4aai**

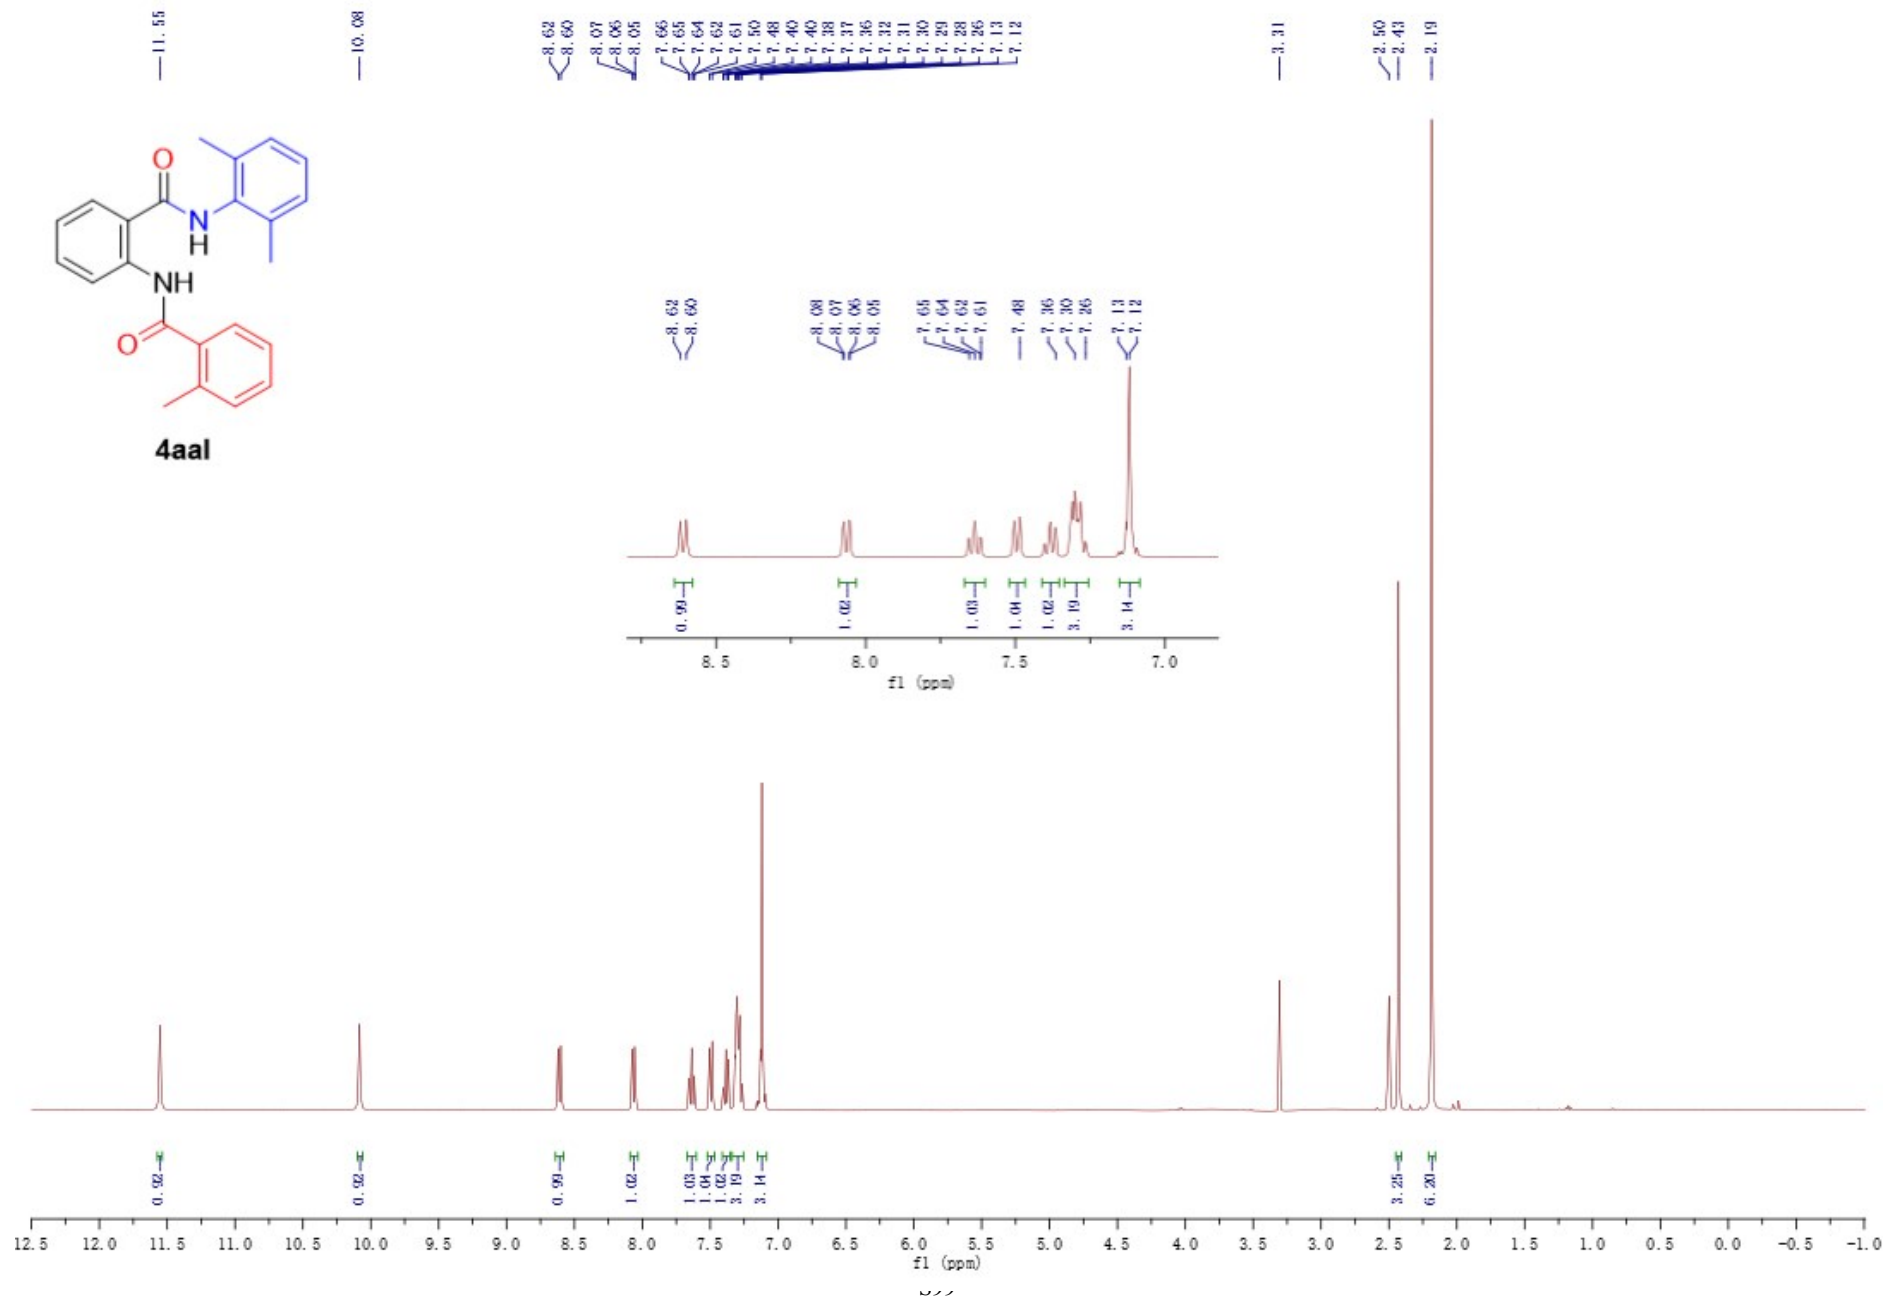

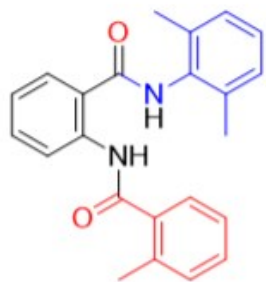

**4aa1**

167.19  
167.15

139.18  
134.47  
131.07  
128.44  
126.93  
126.00  
123.15  
120.99  
120.69

19.49  
17.85

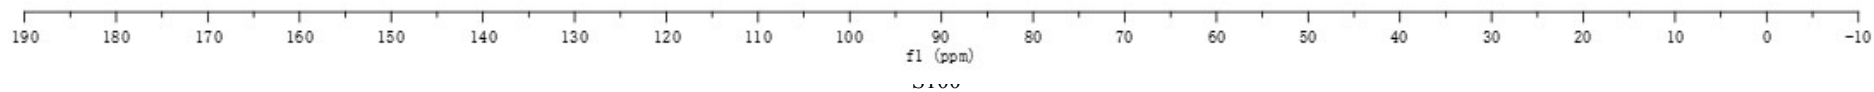

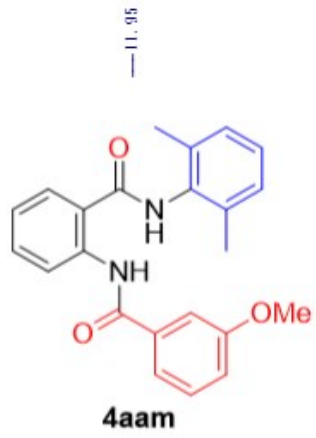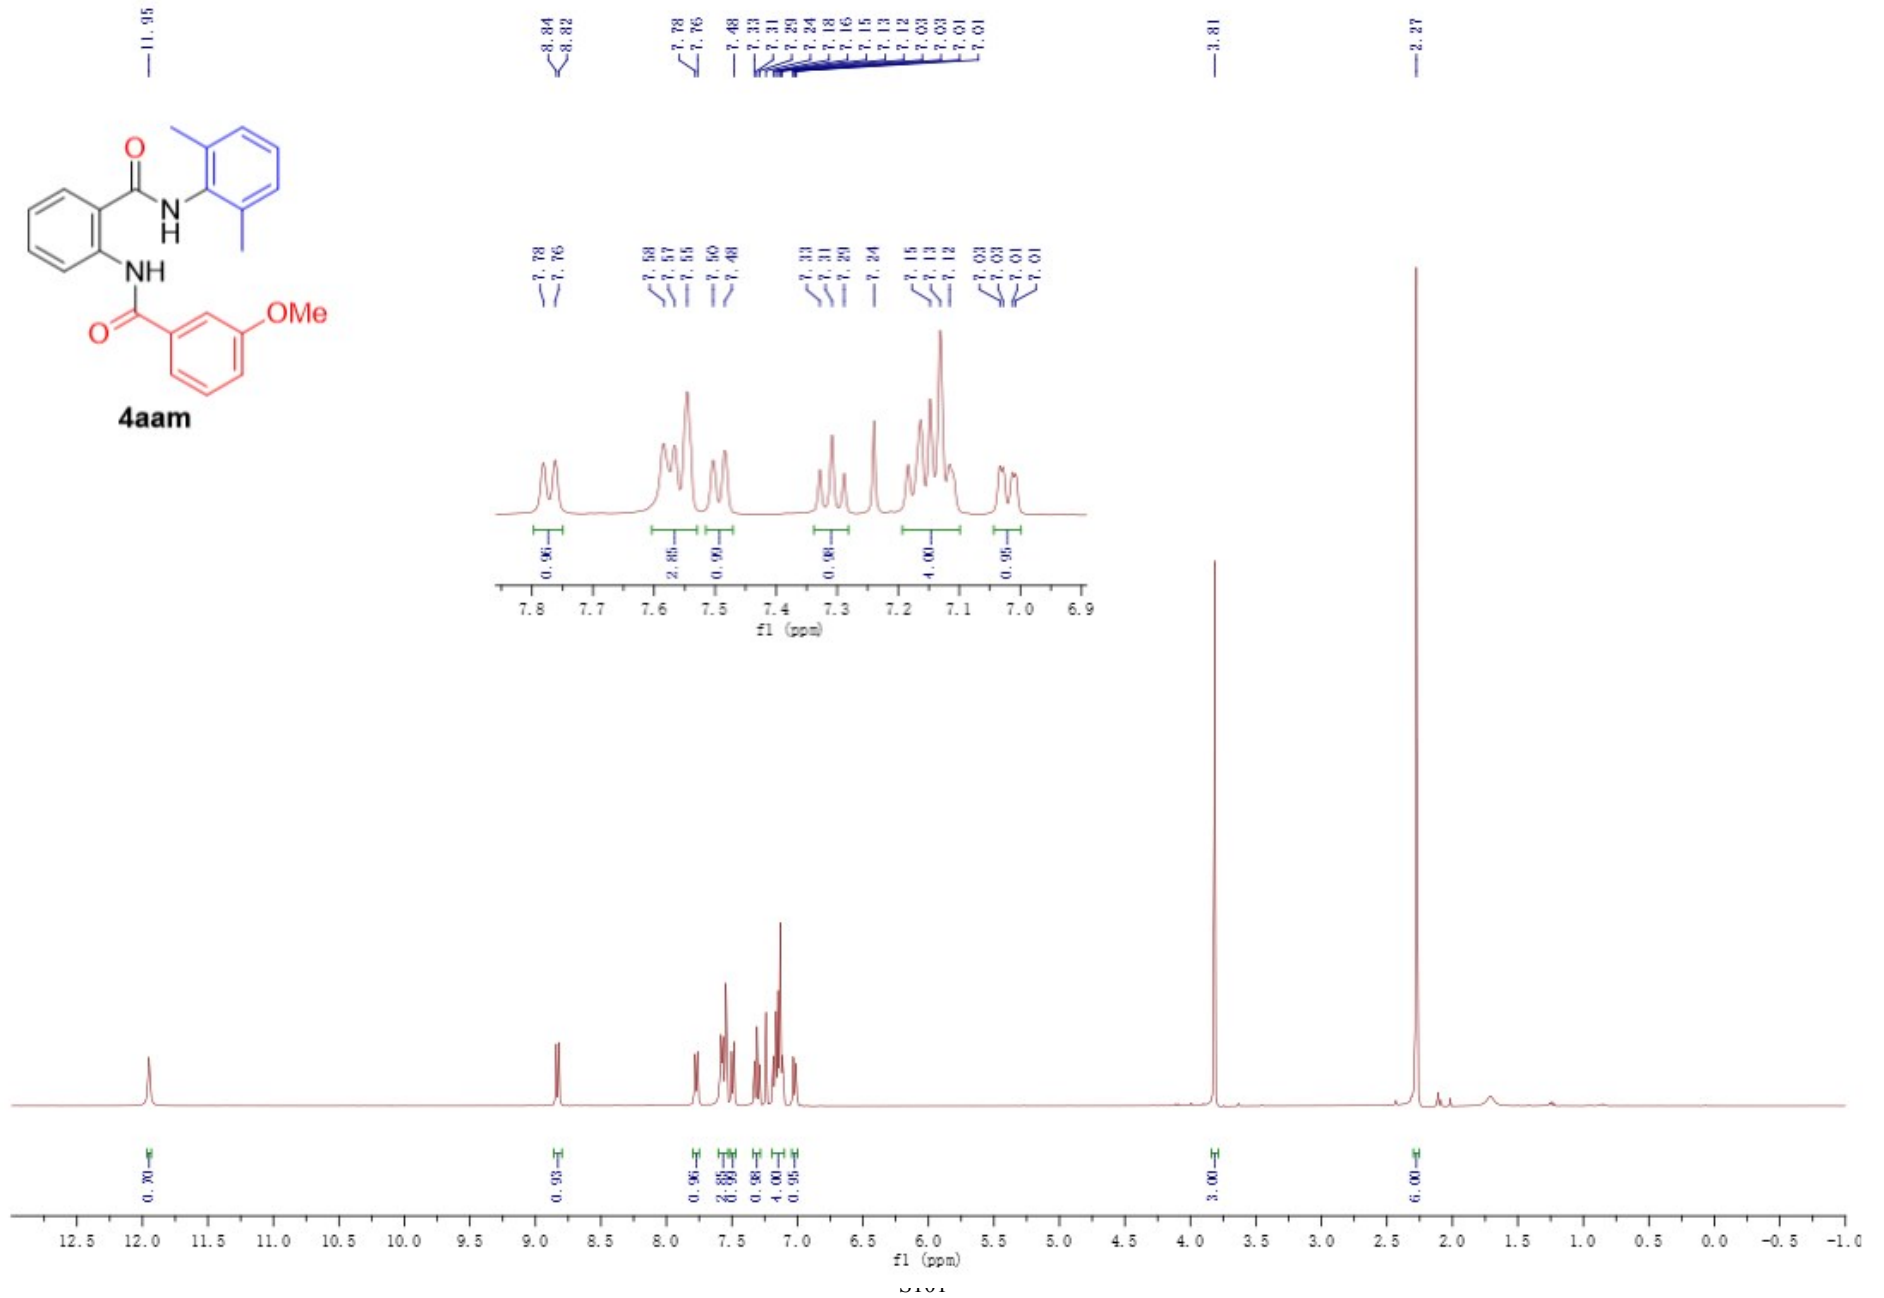

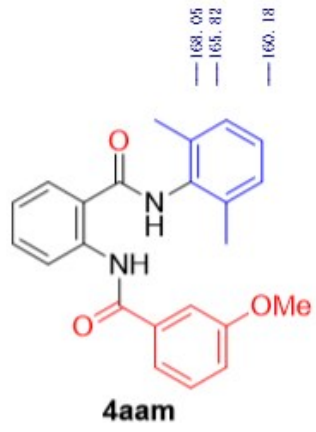

168.05  
165.82  
160.18

140.63  
136.37  
135.88  
133.38  
131.67  
126.98  
122.16  
120.60  
119.39  
118.62  
112.84

55.60

18.68

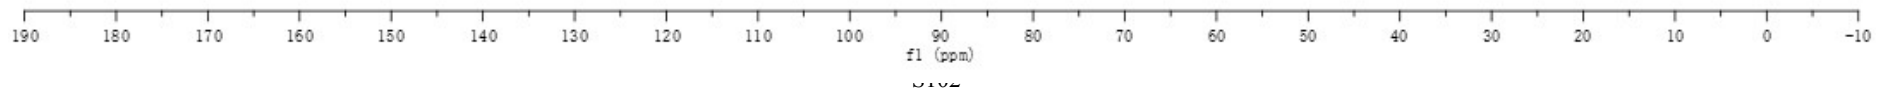

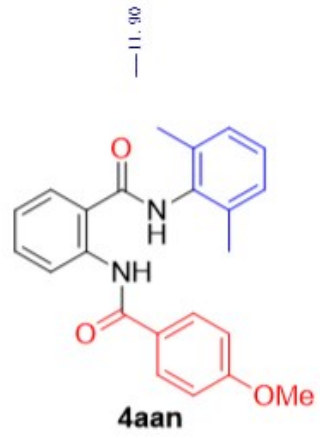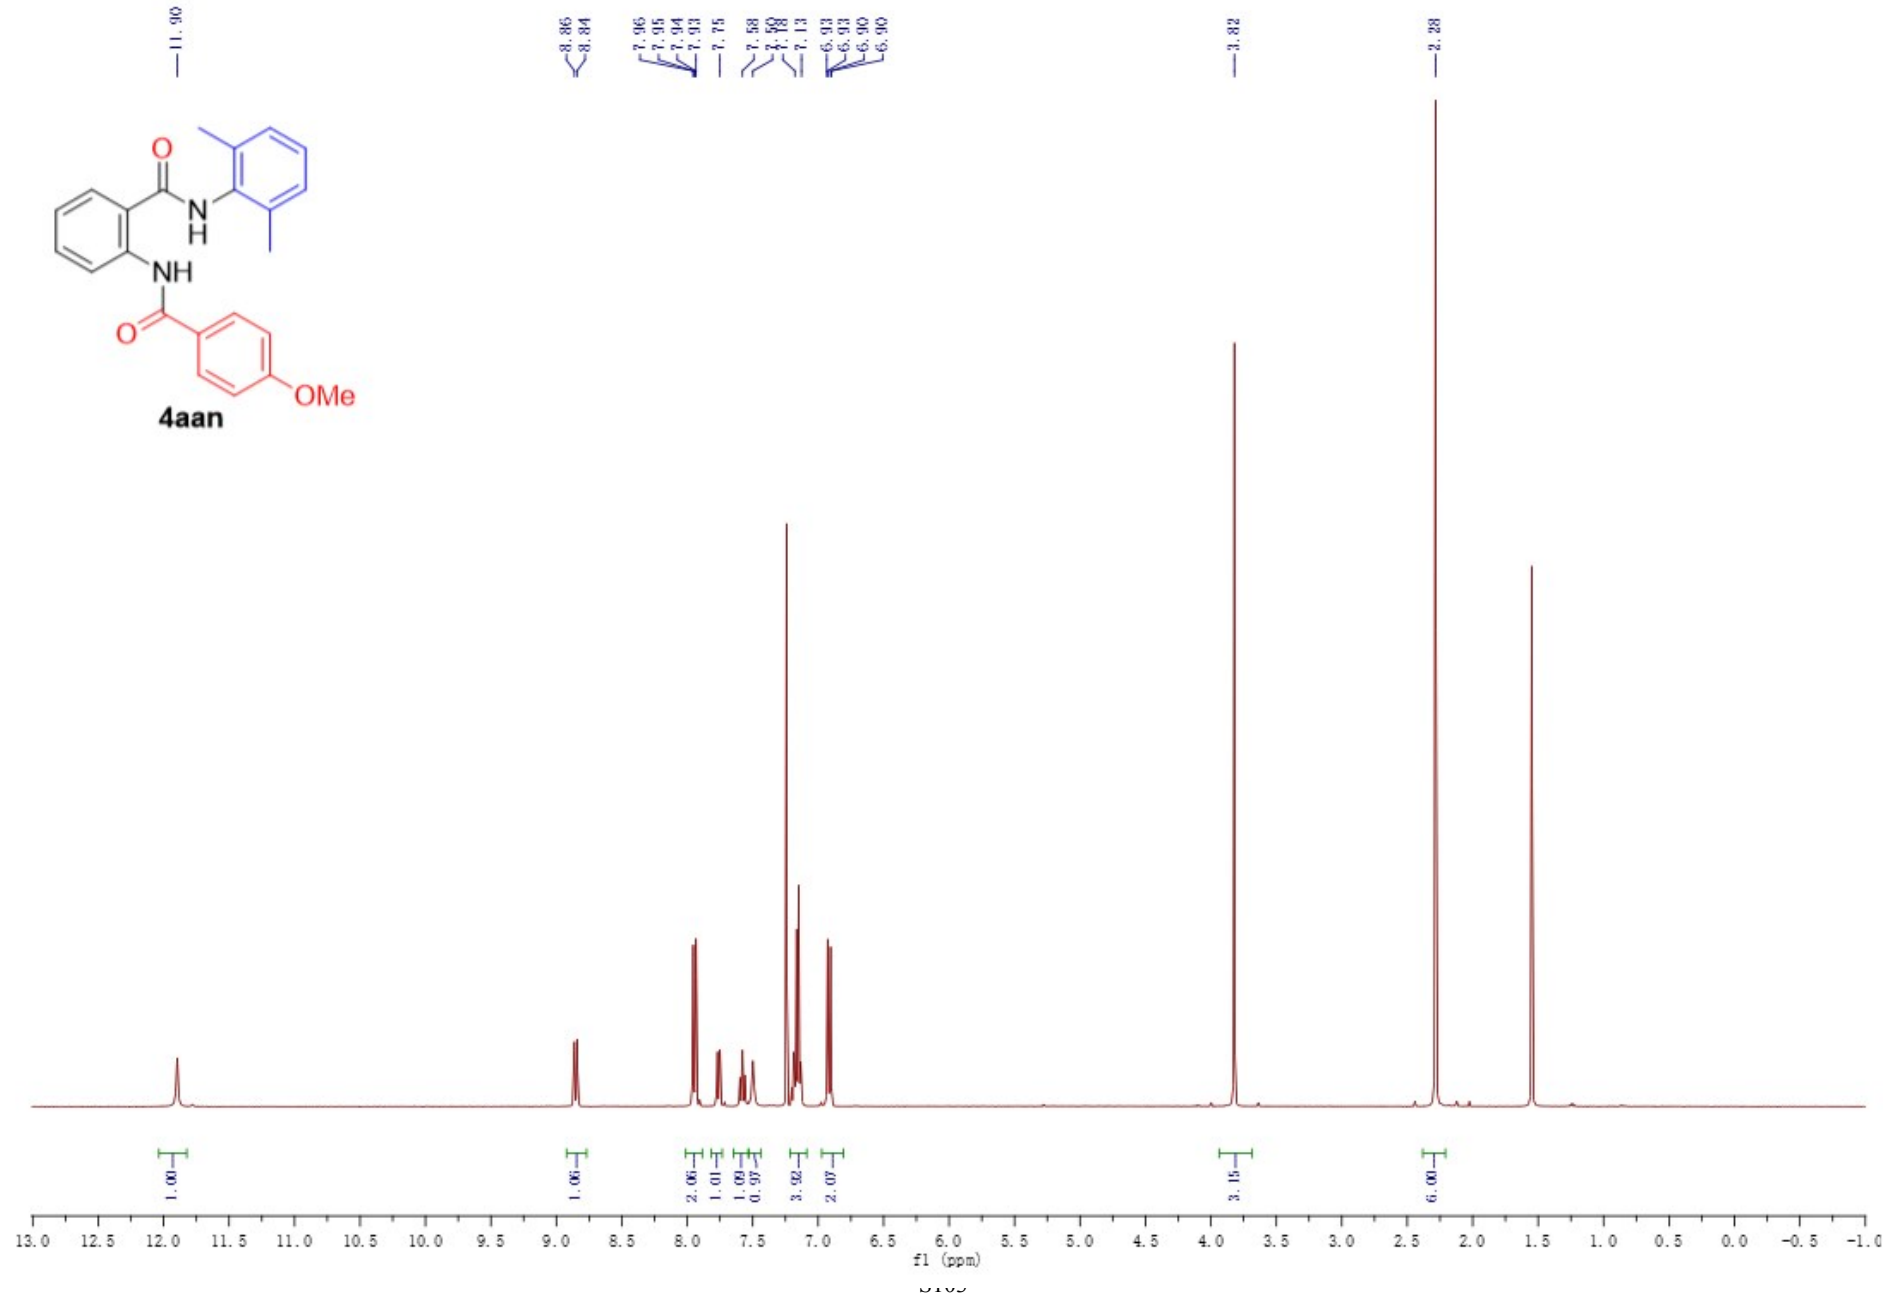

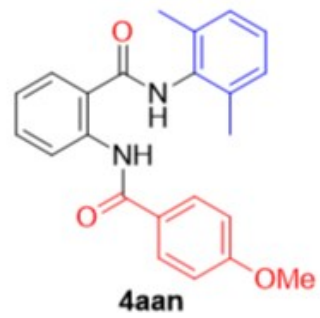

168.24  
165.47  
162.67

140.74  
135.90  
133.32  
129.51  
126.98  
122.93  
121.88  
120.23  
114.10

55.88

18.67

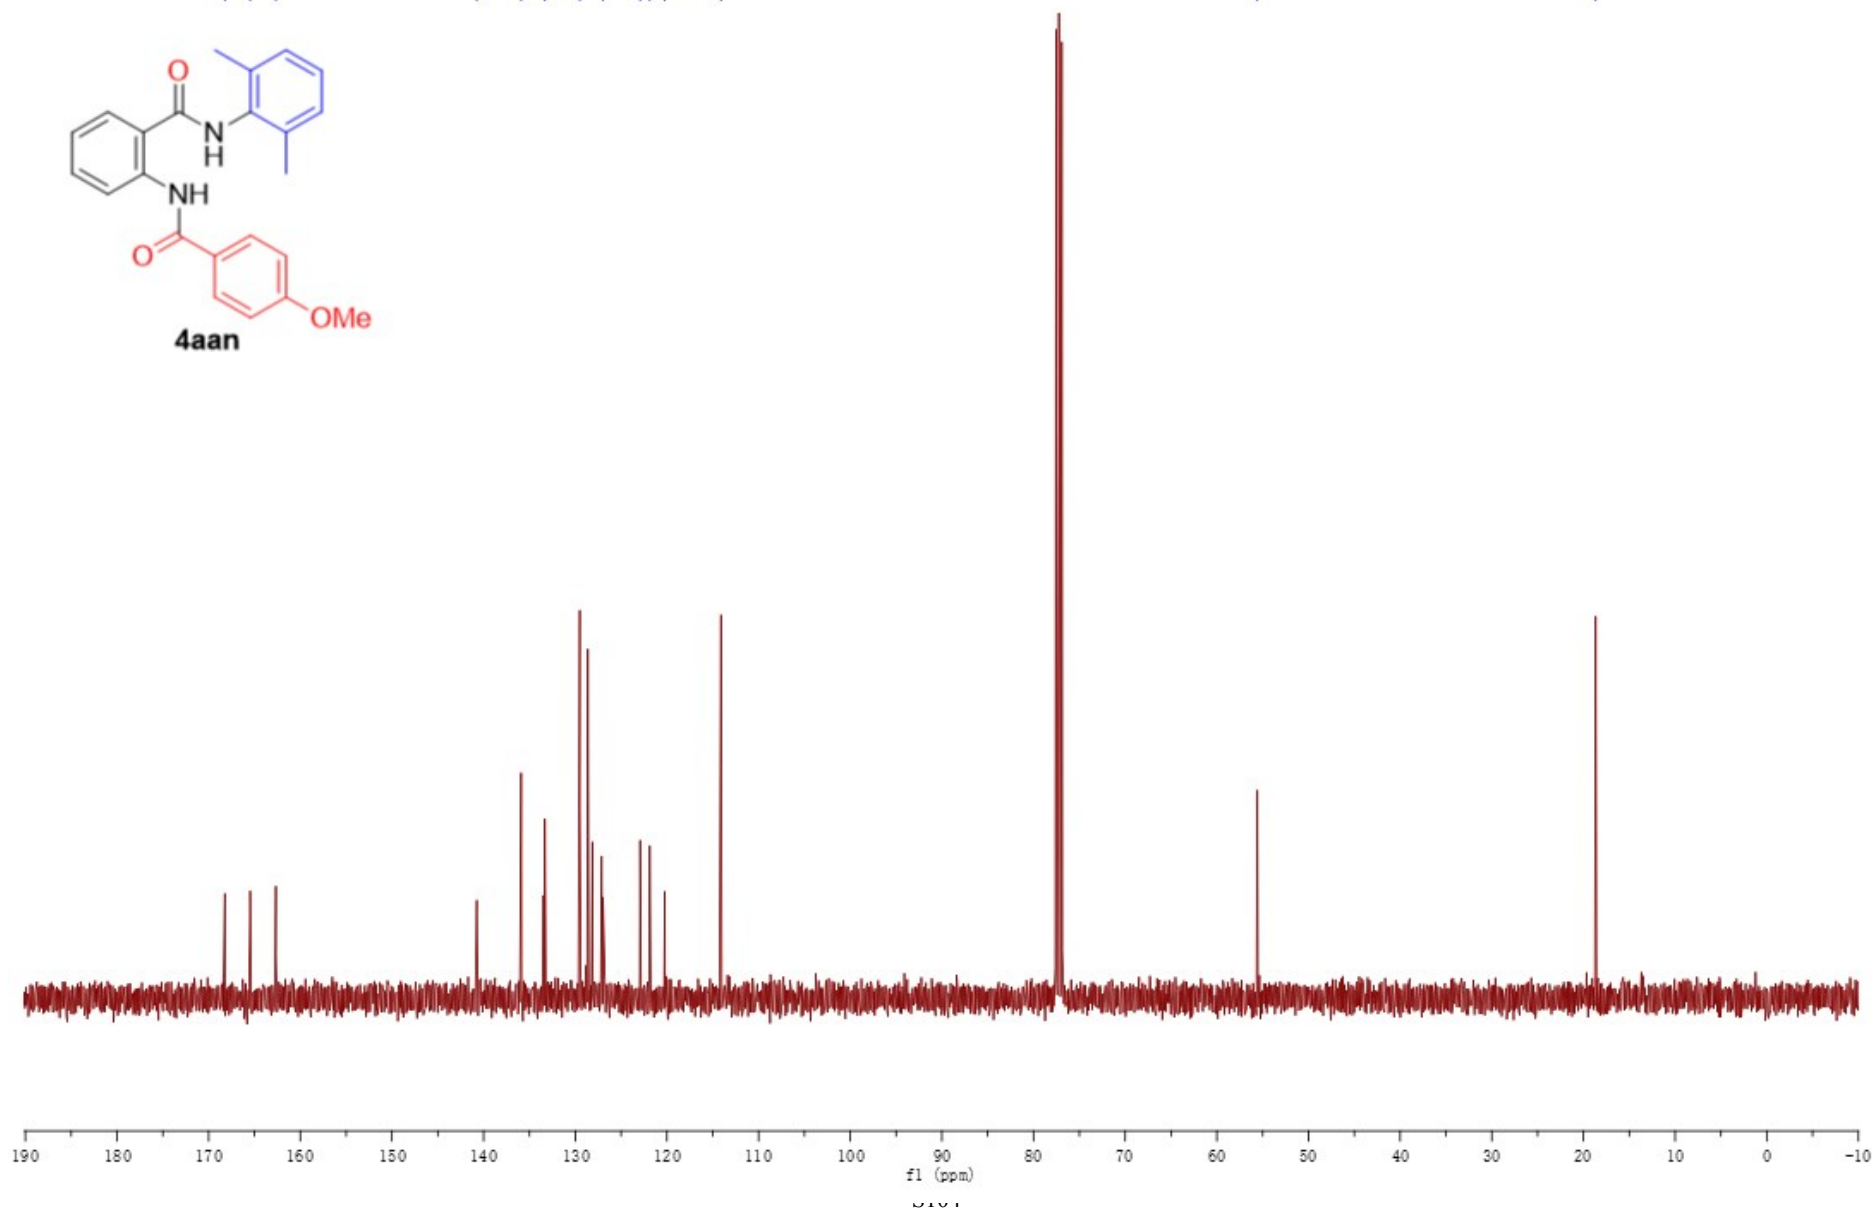



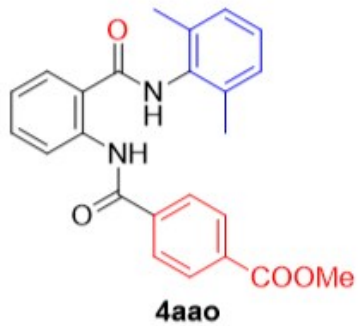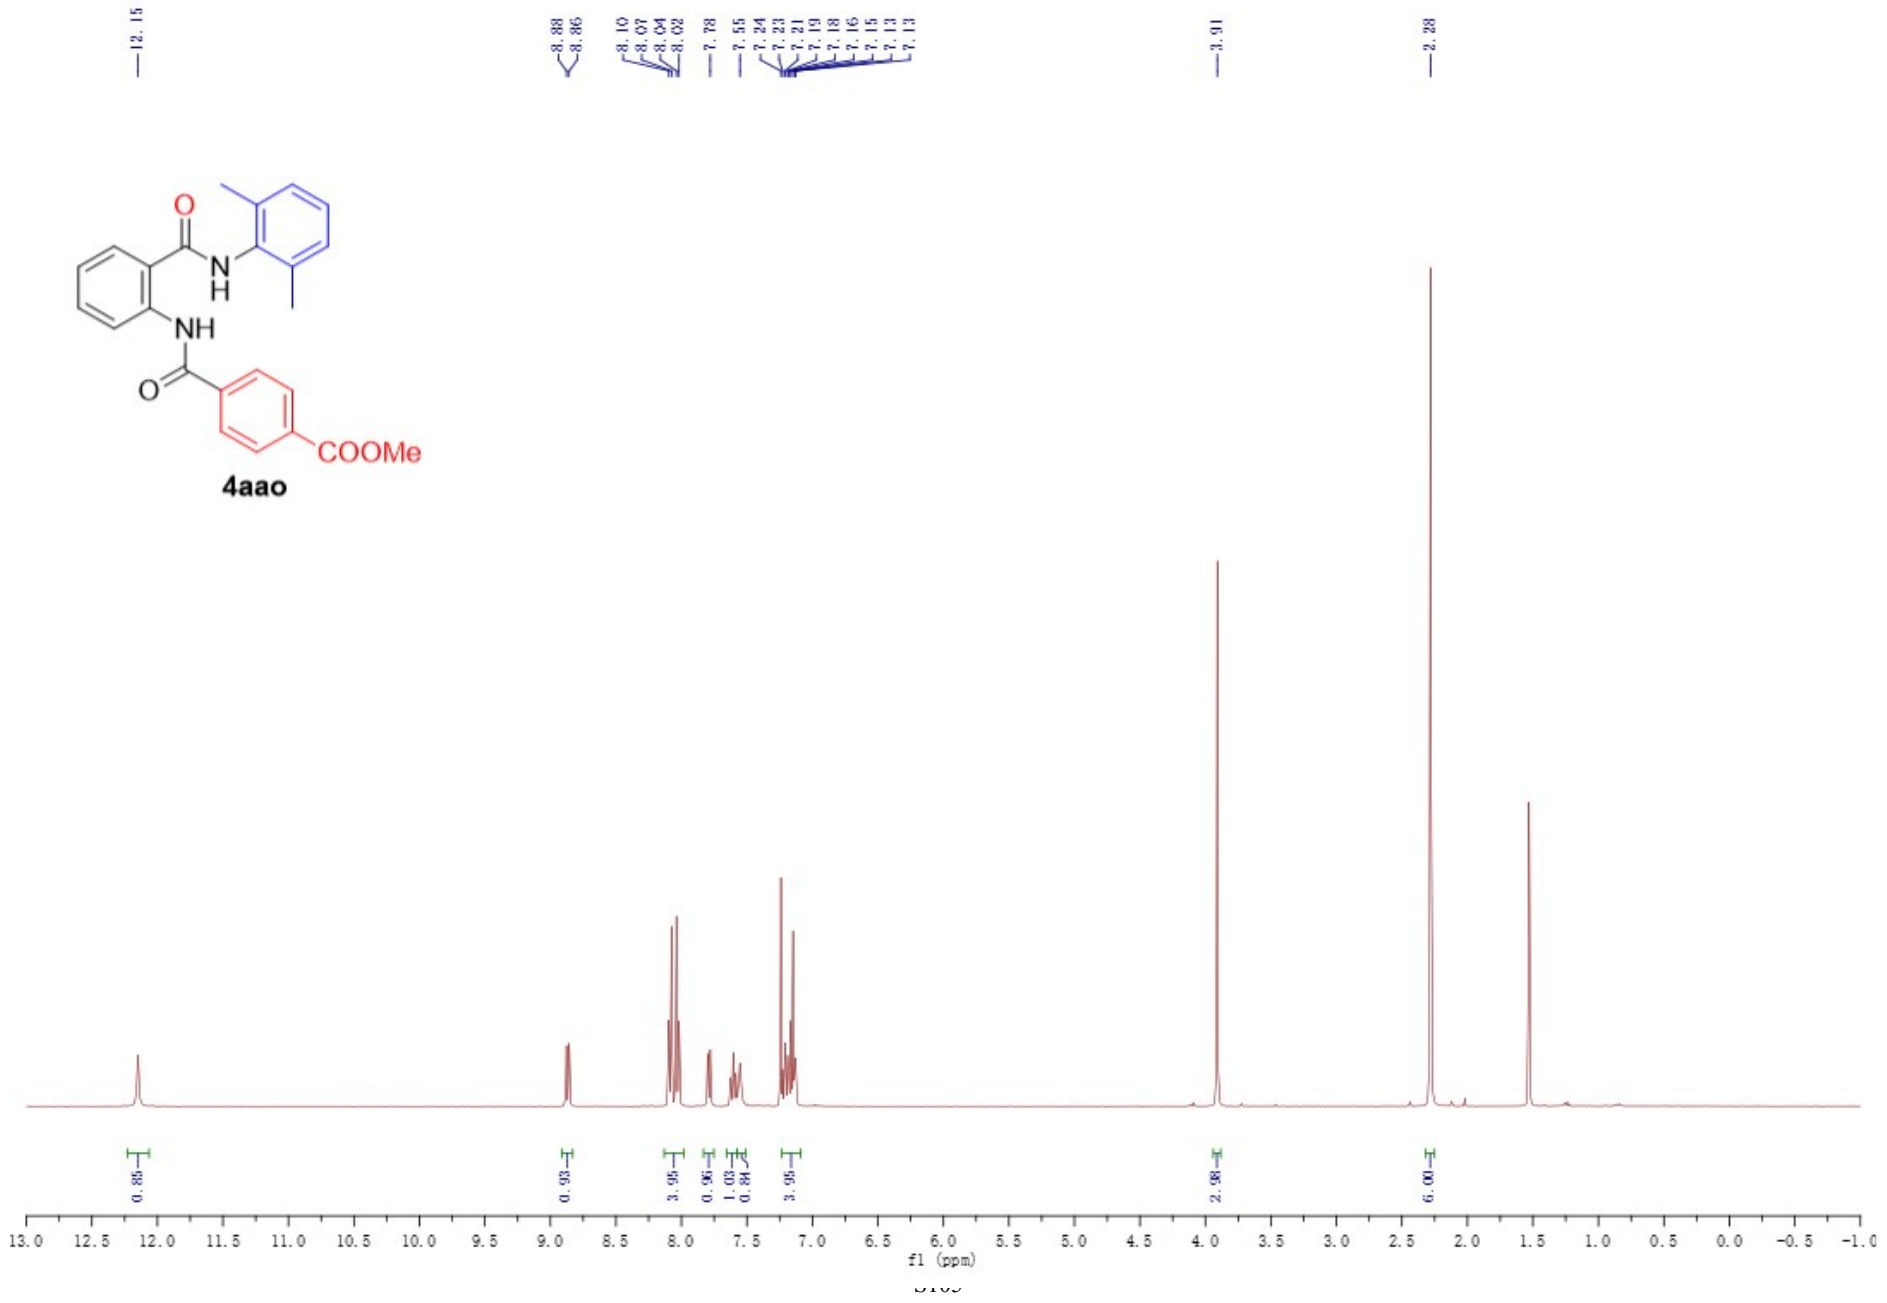

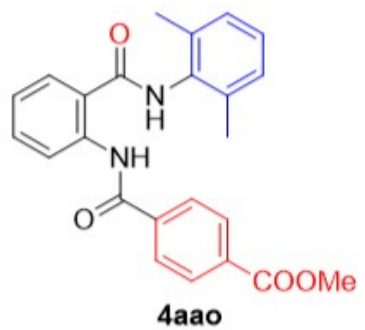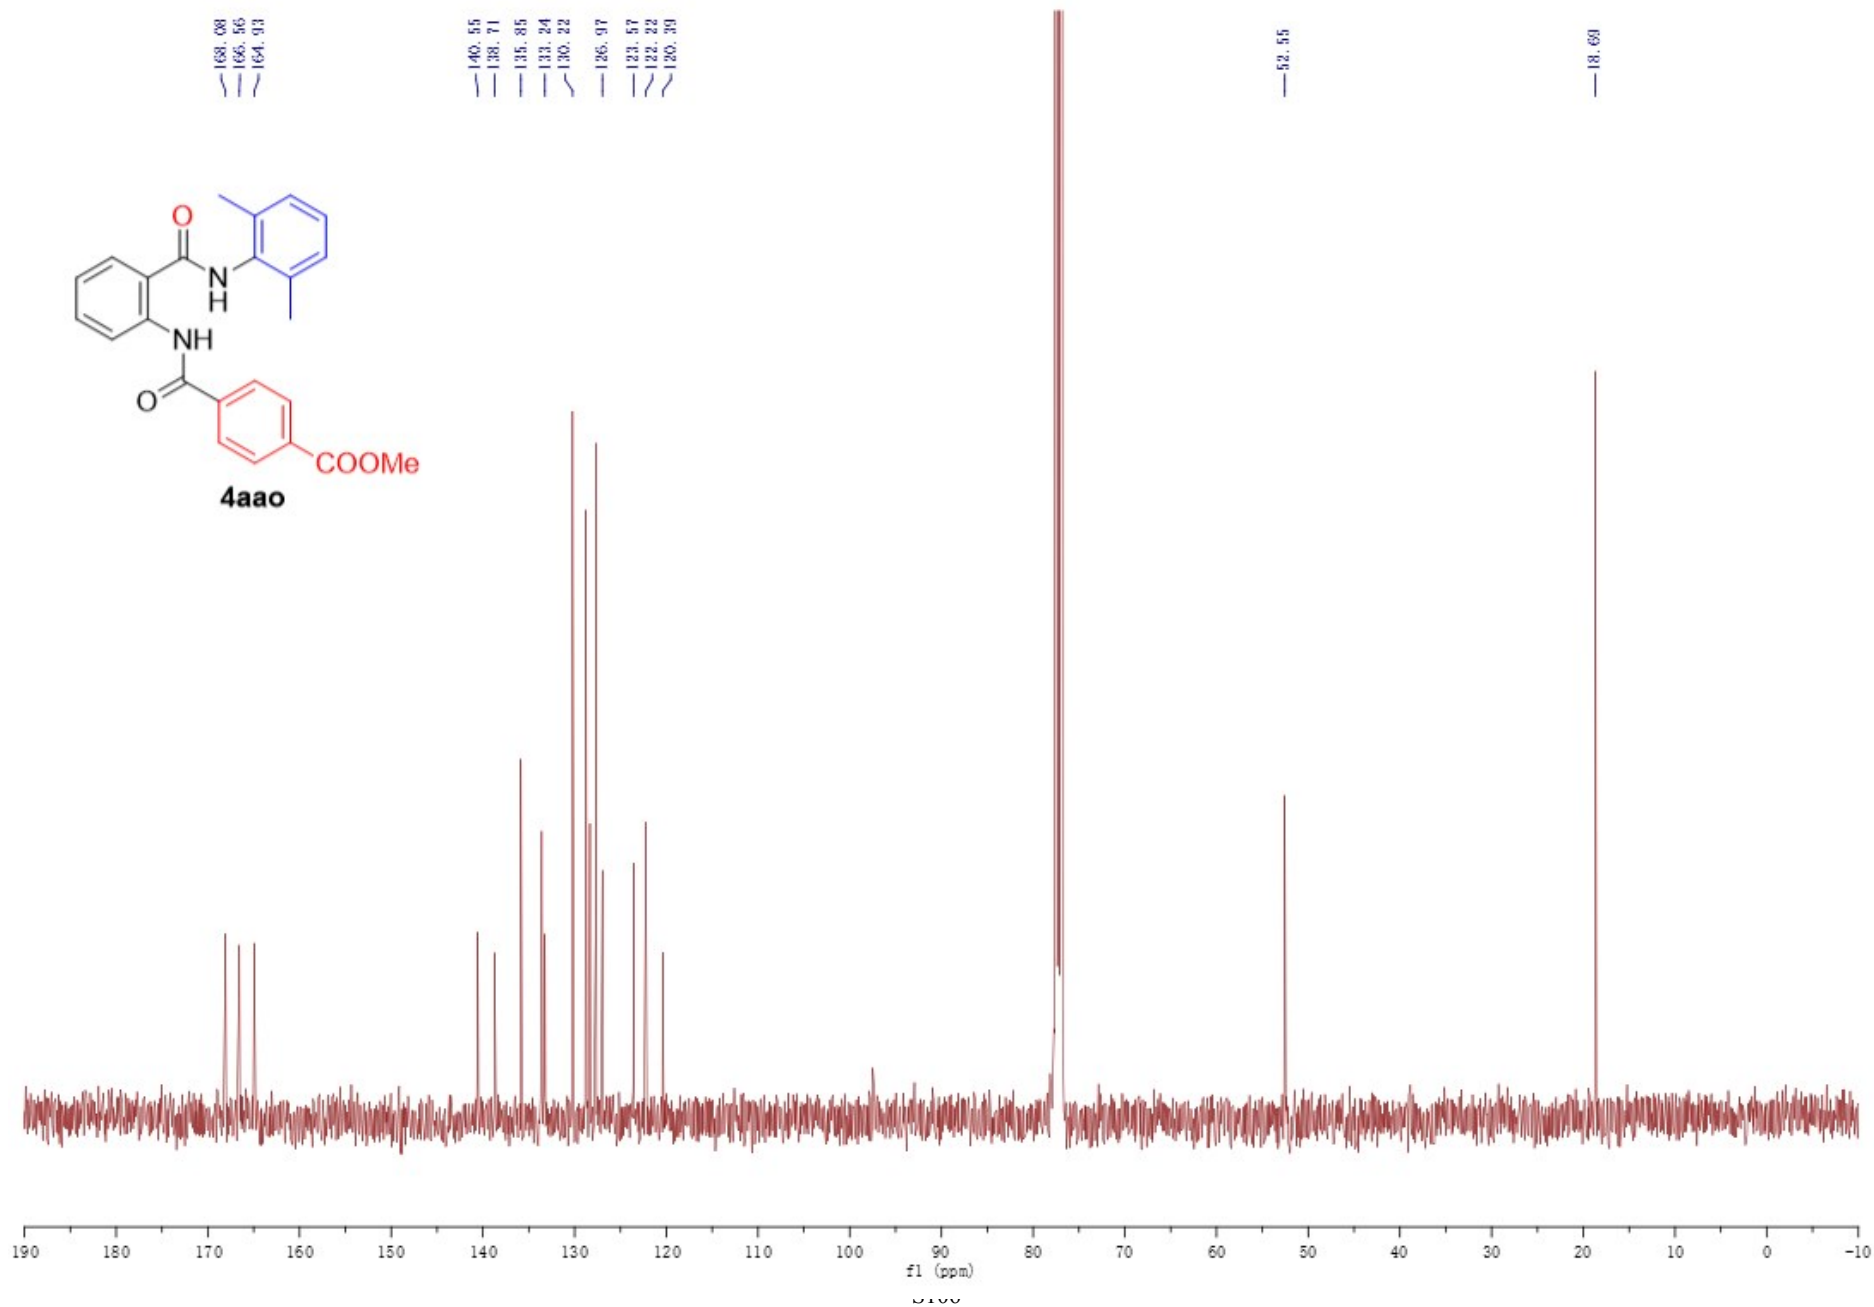

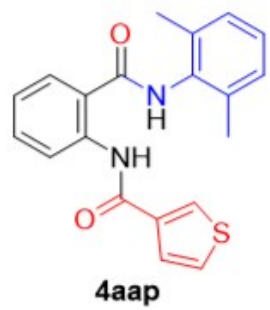

11.93

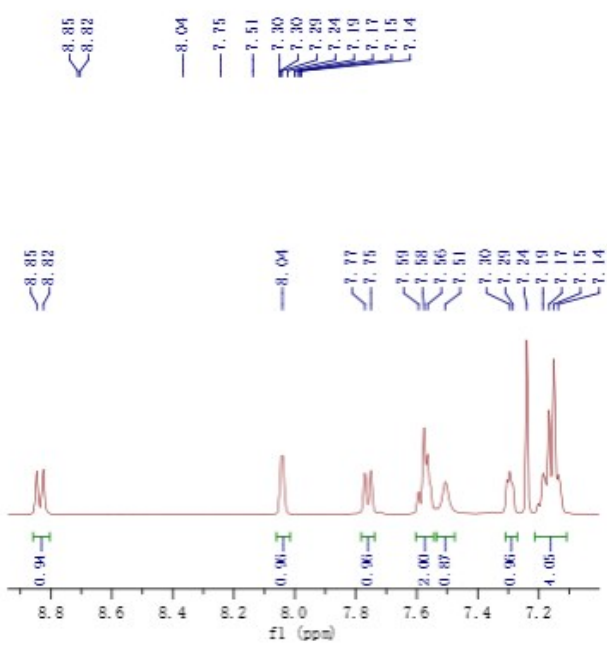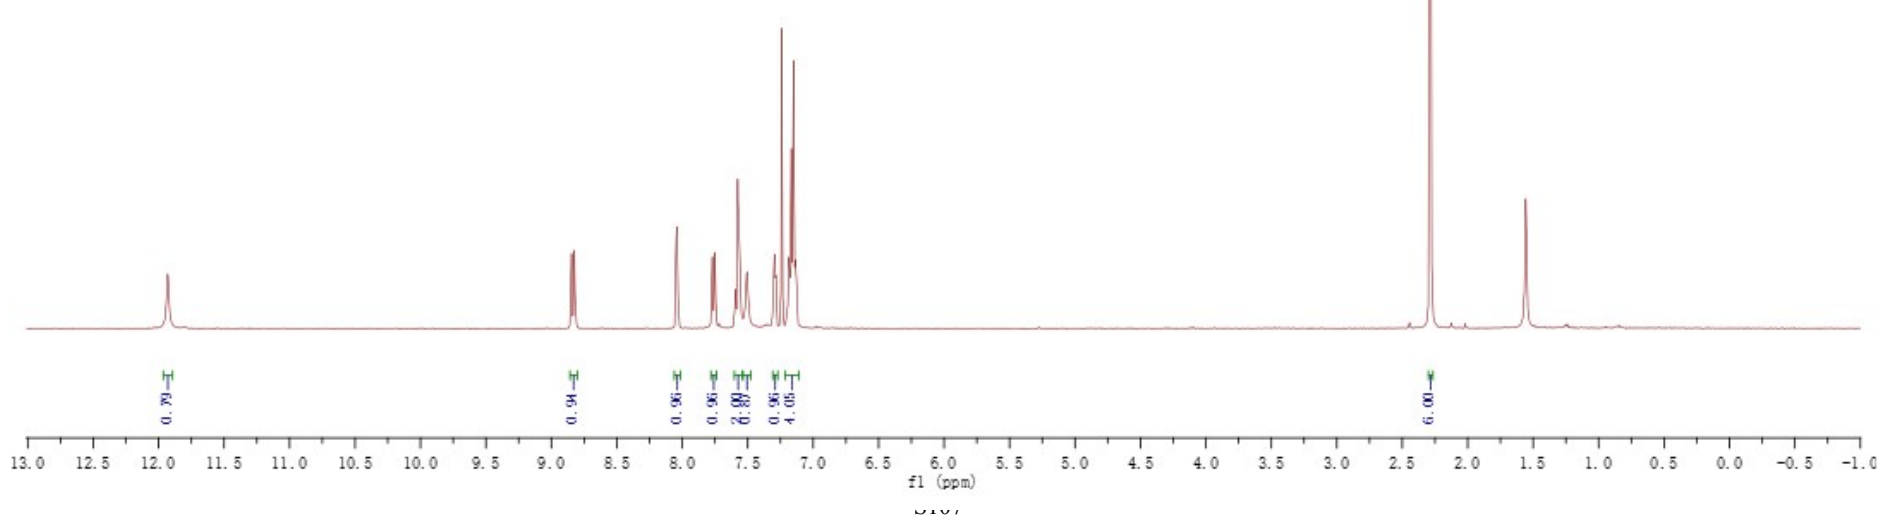

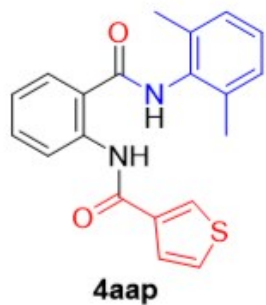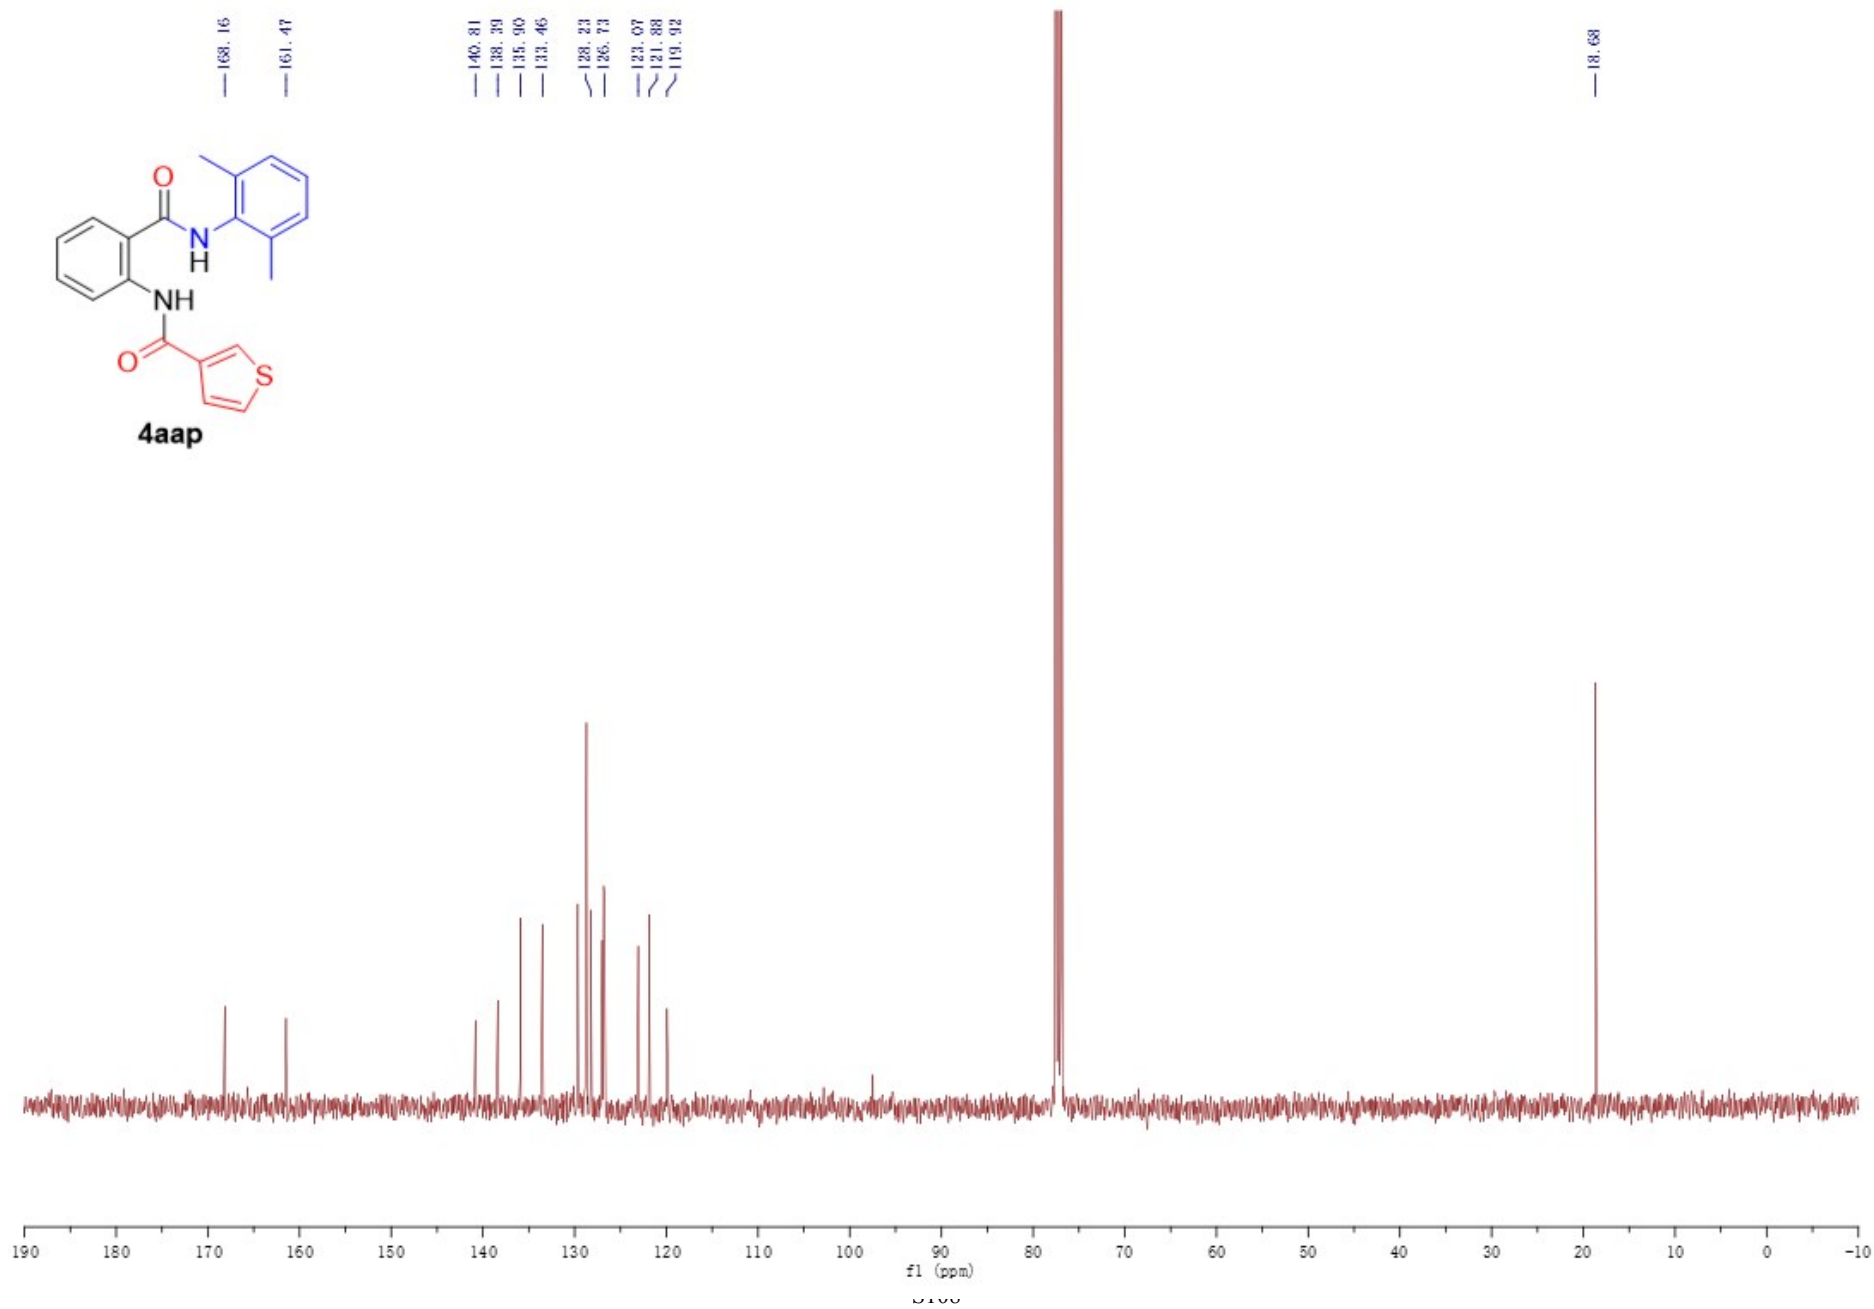

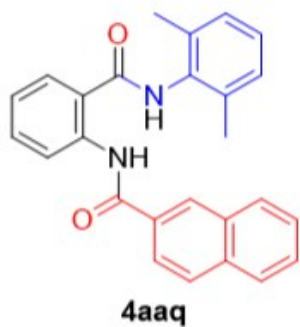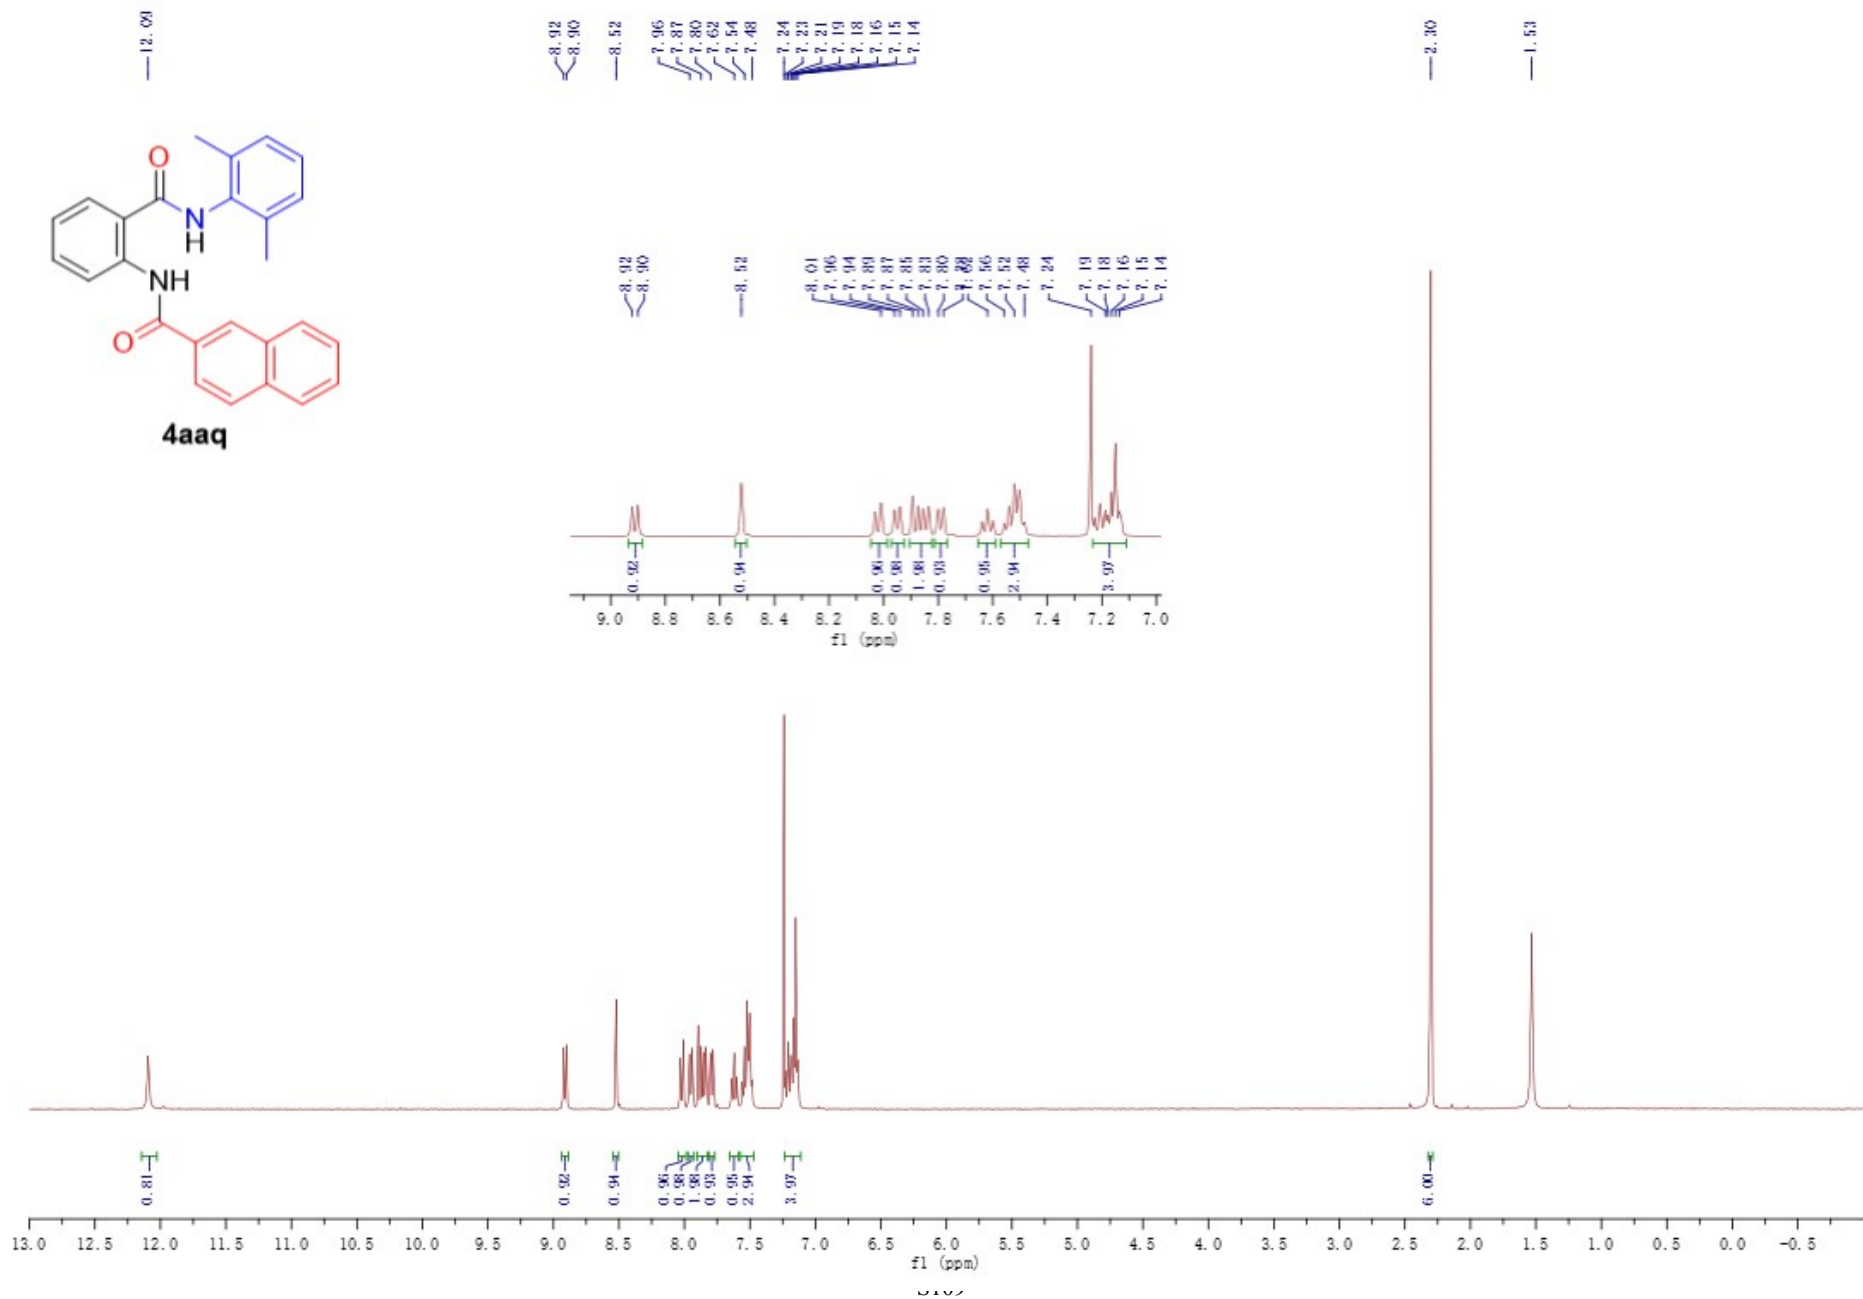

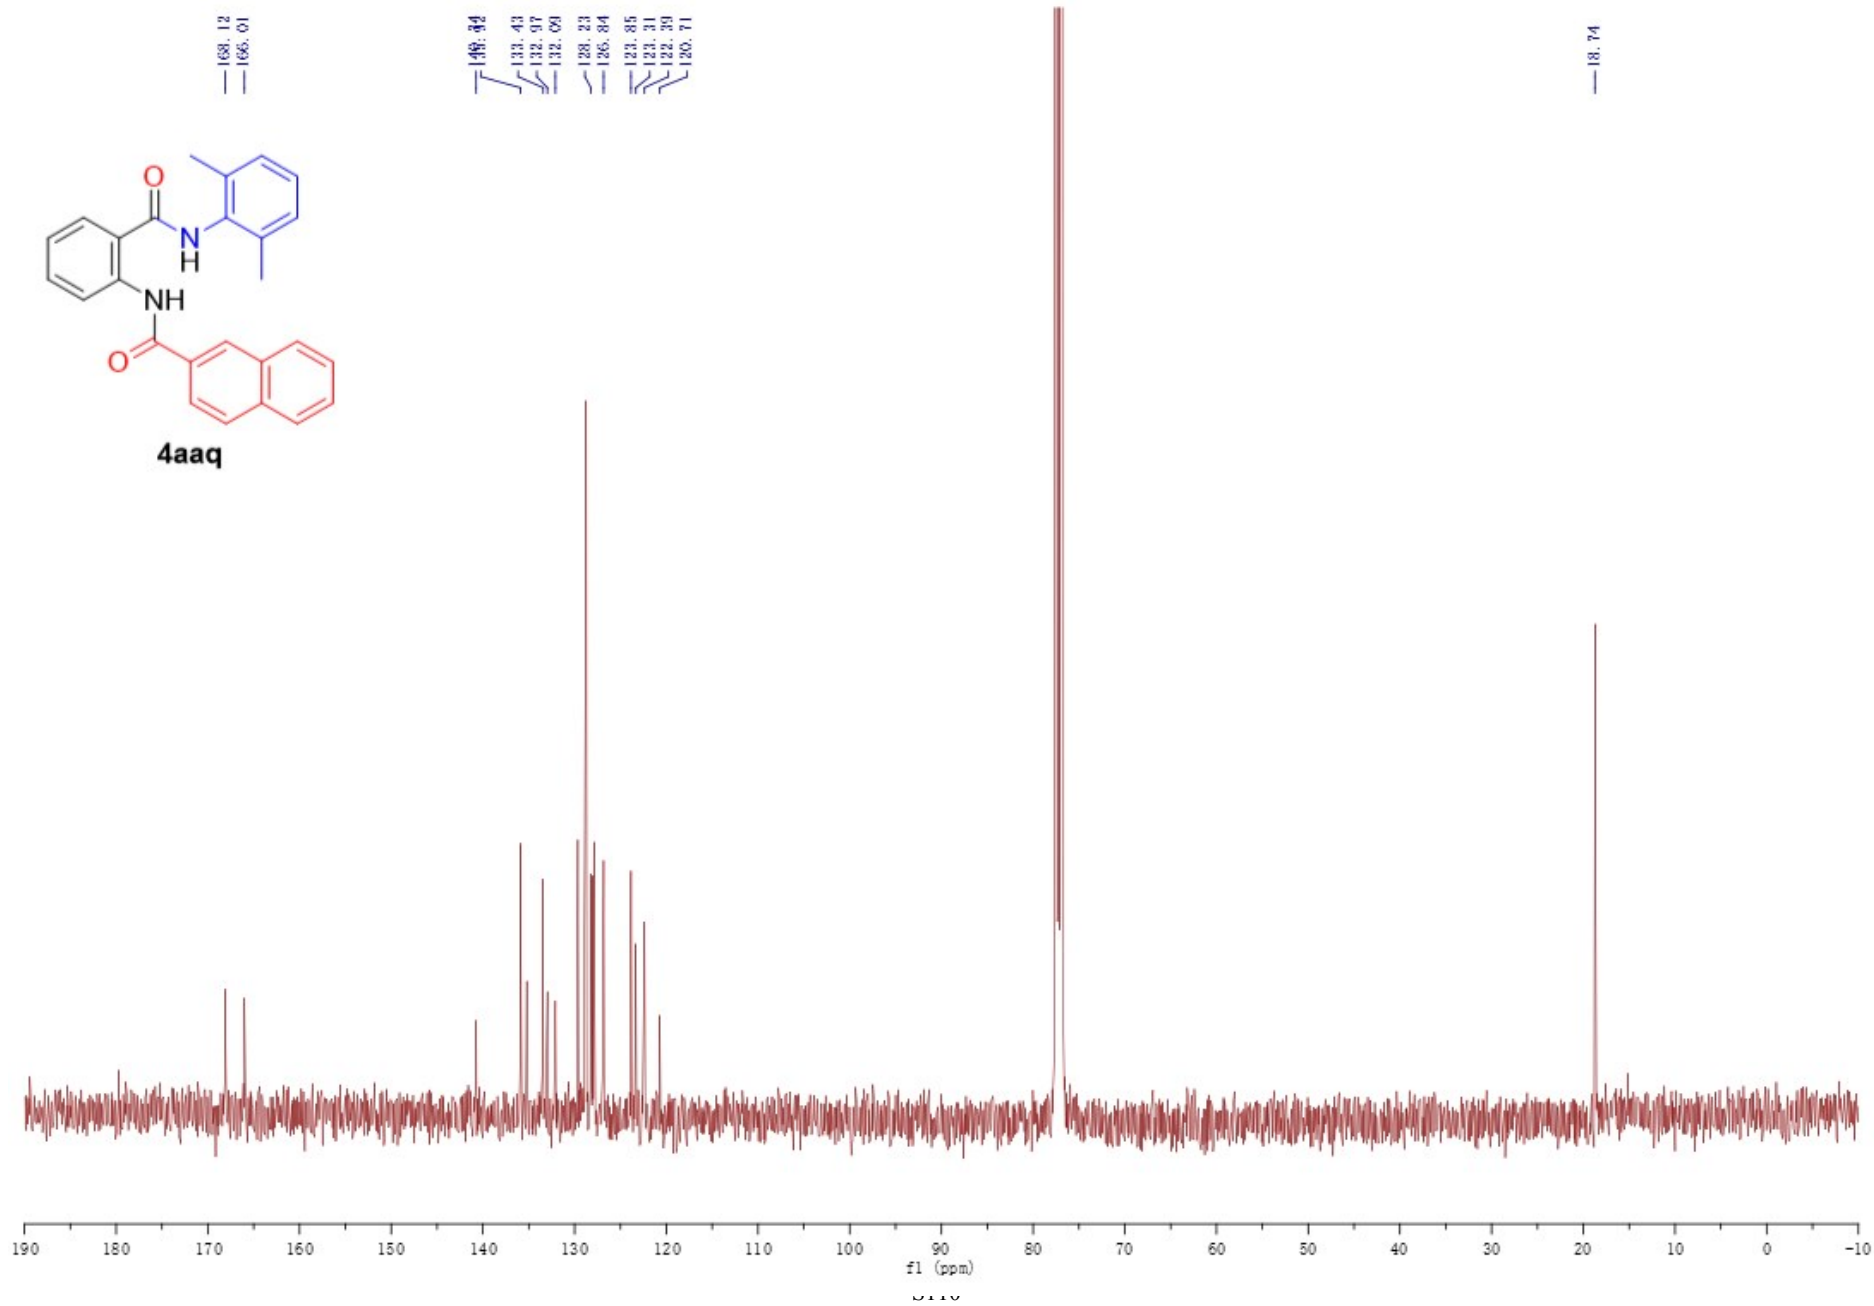

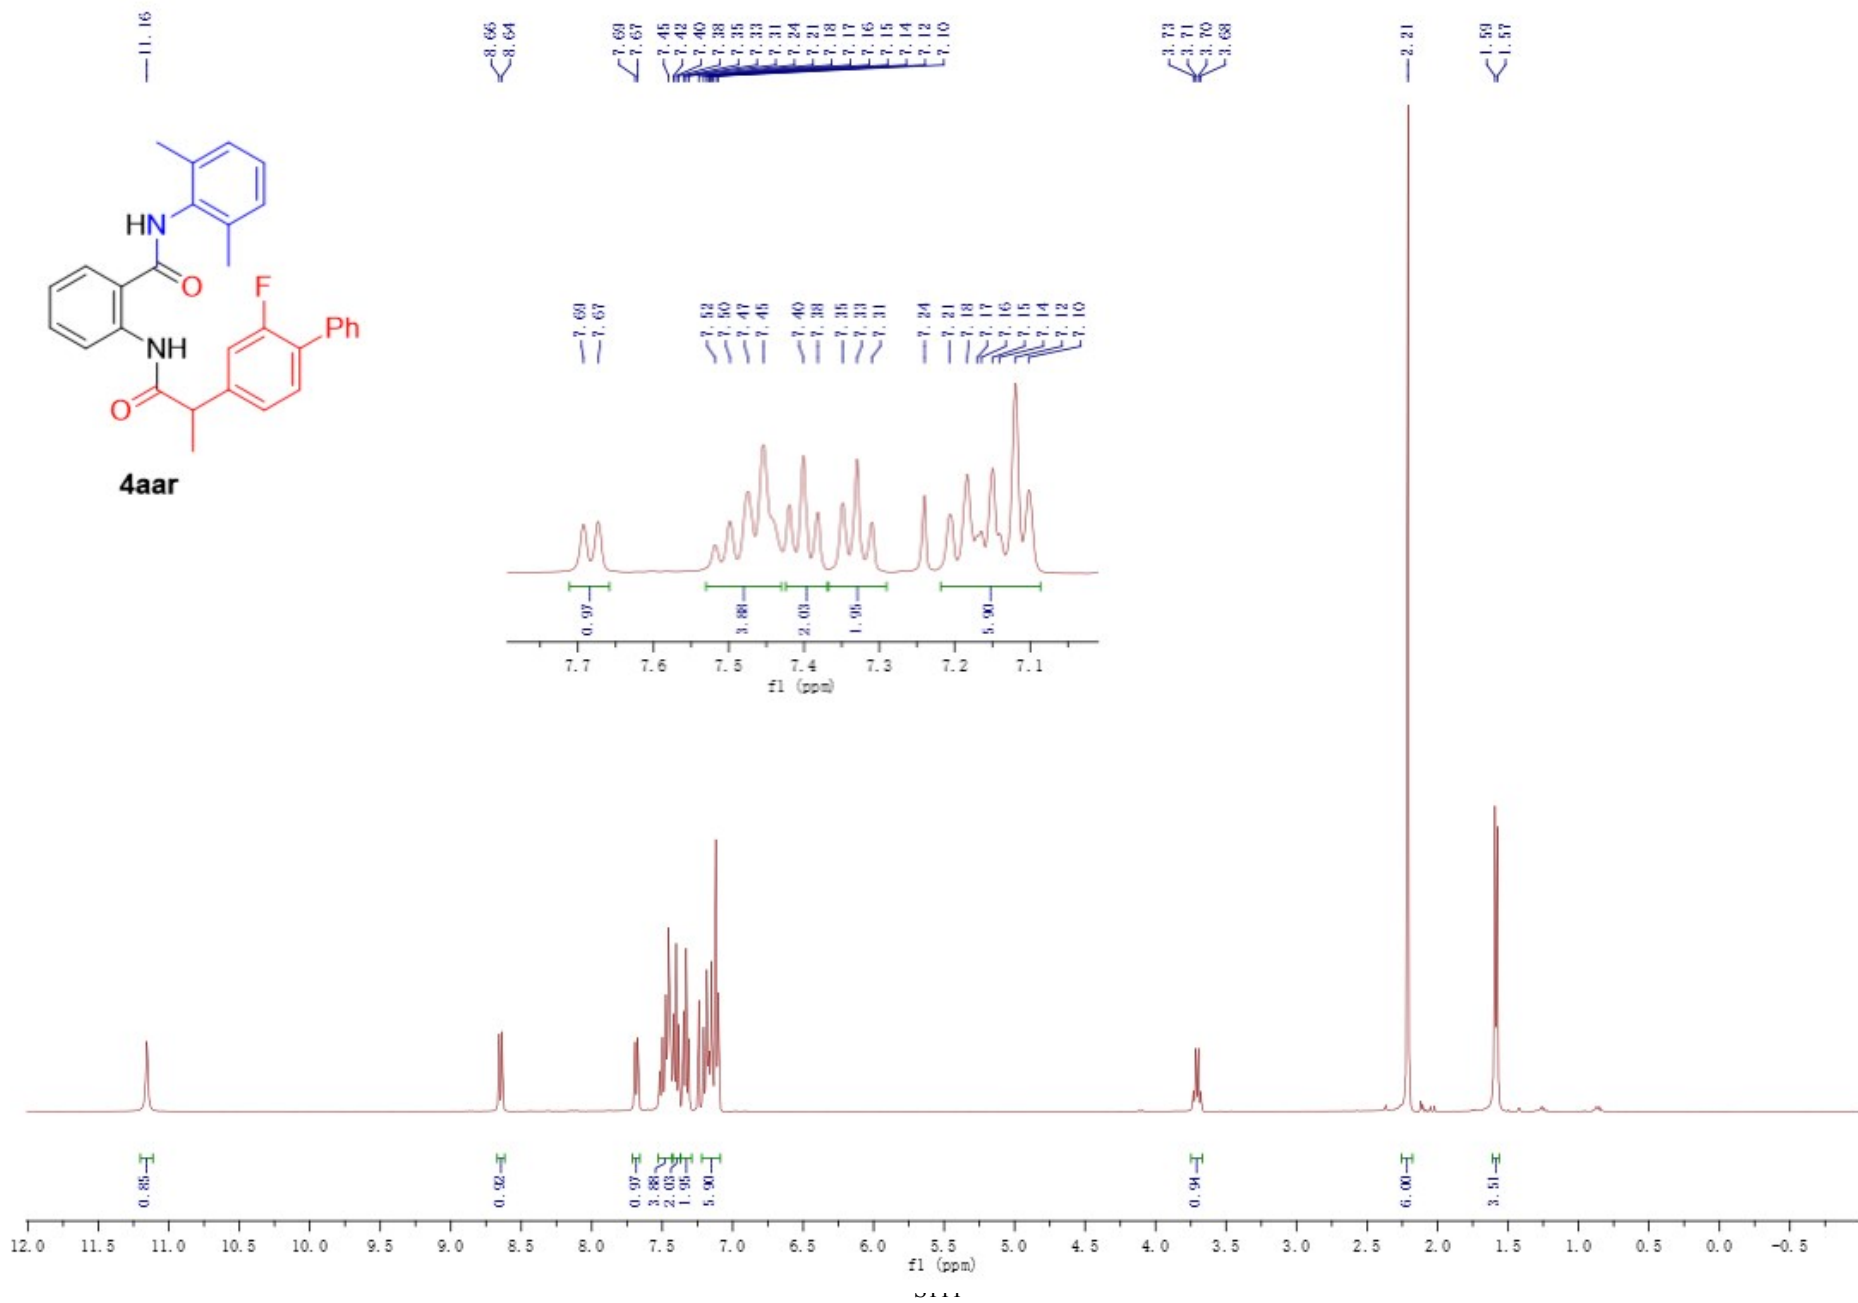

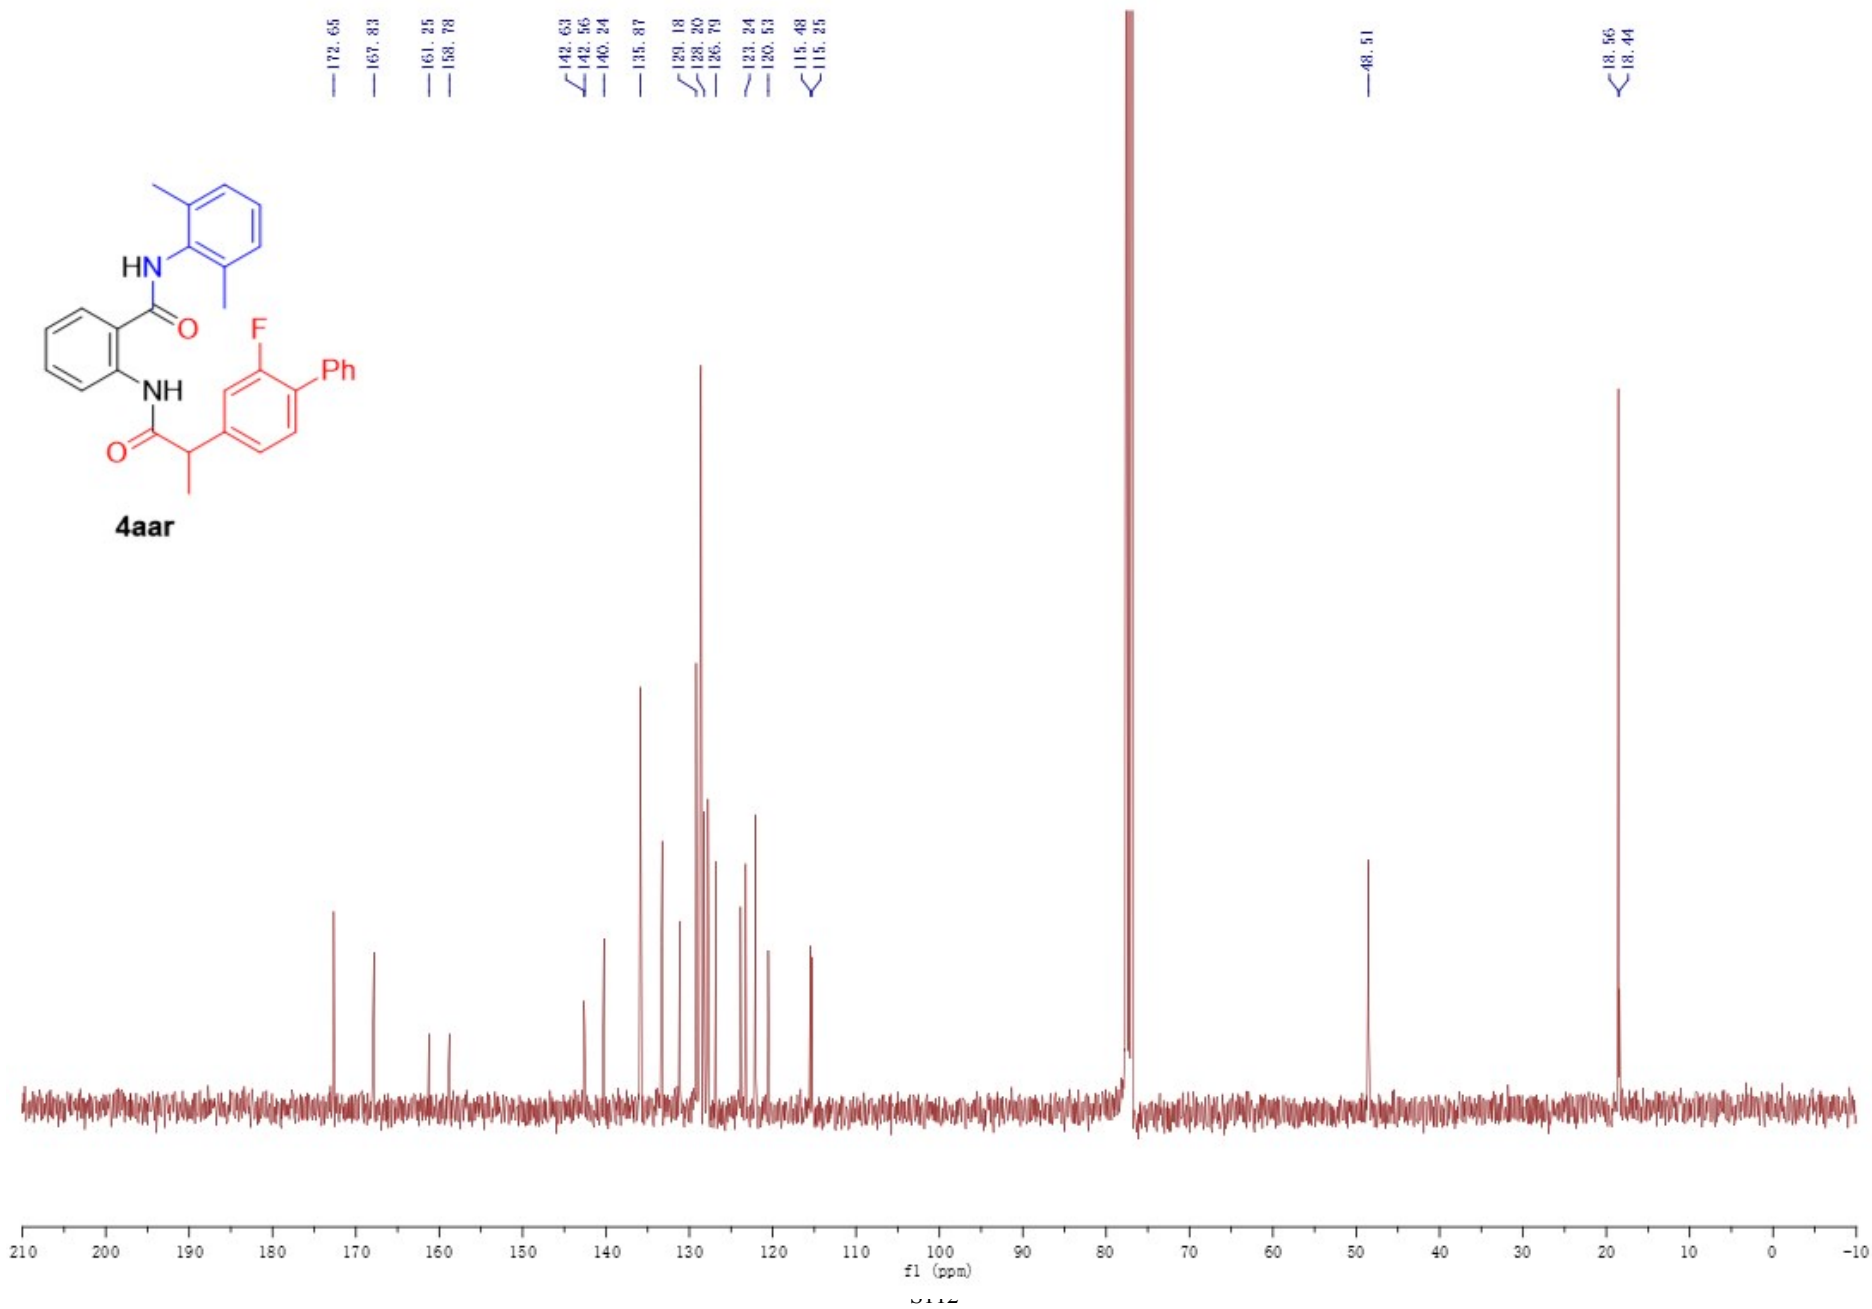



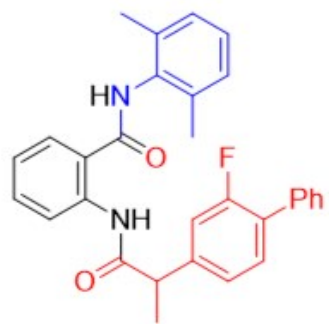

**4aar**

117.32  
117.35  
117.37

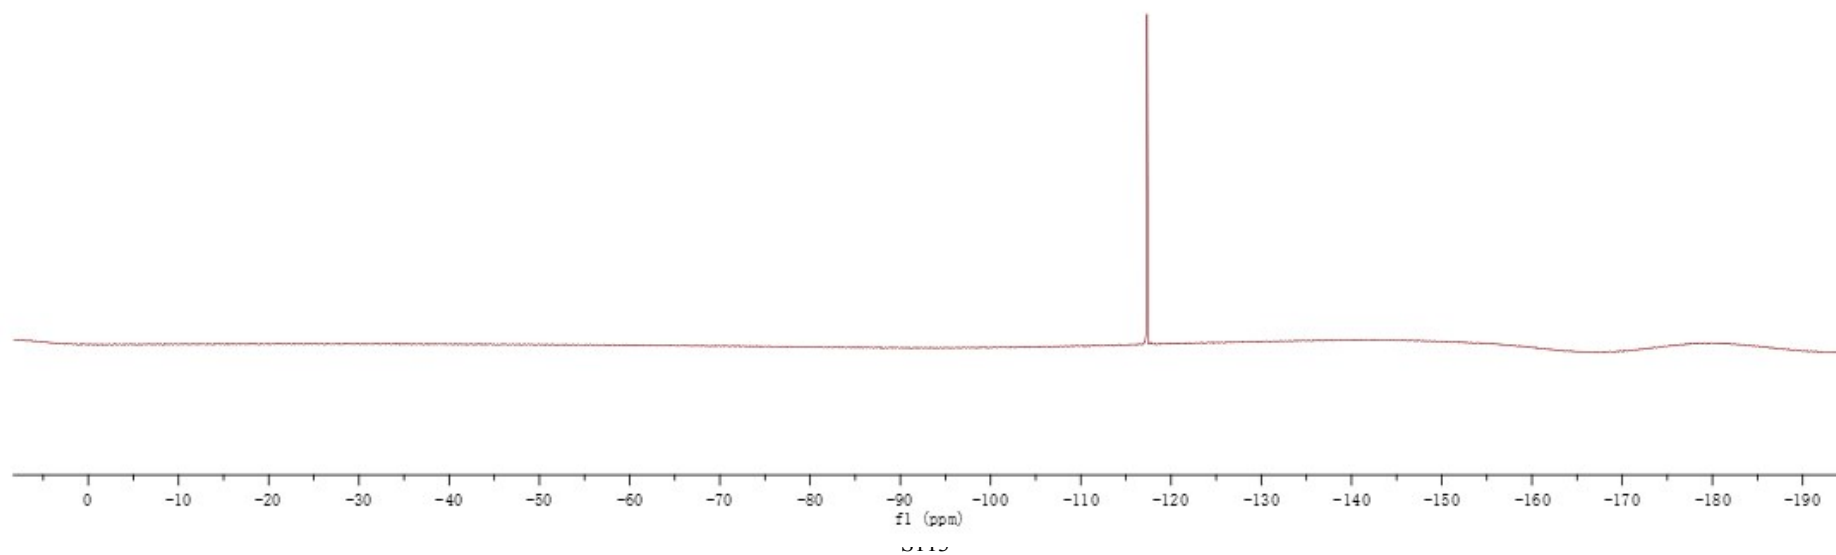

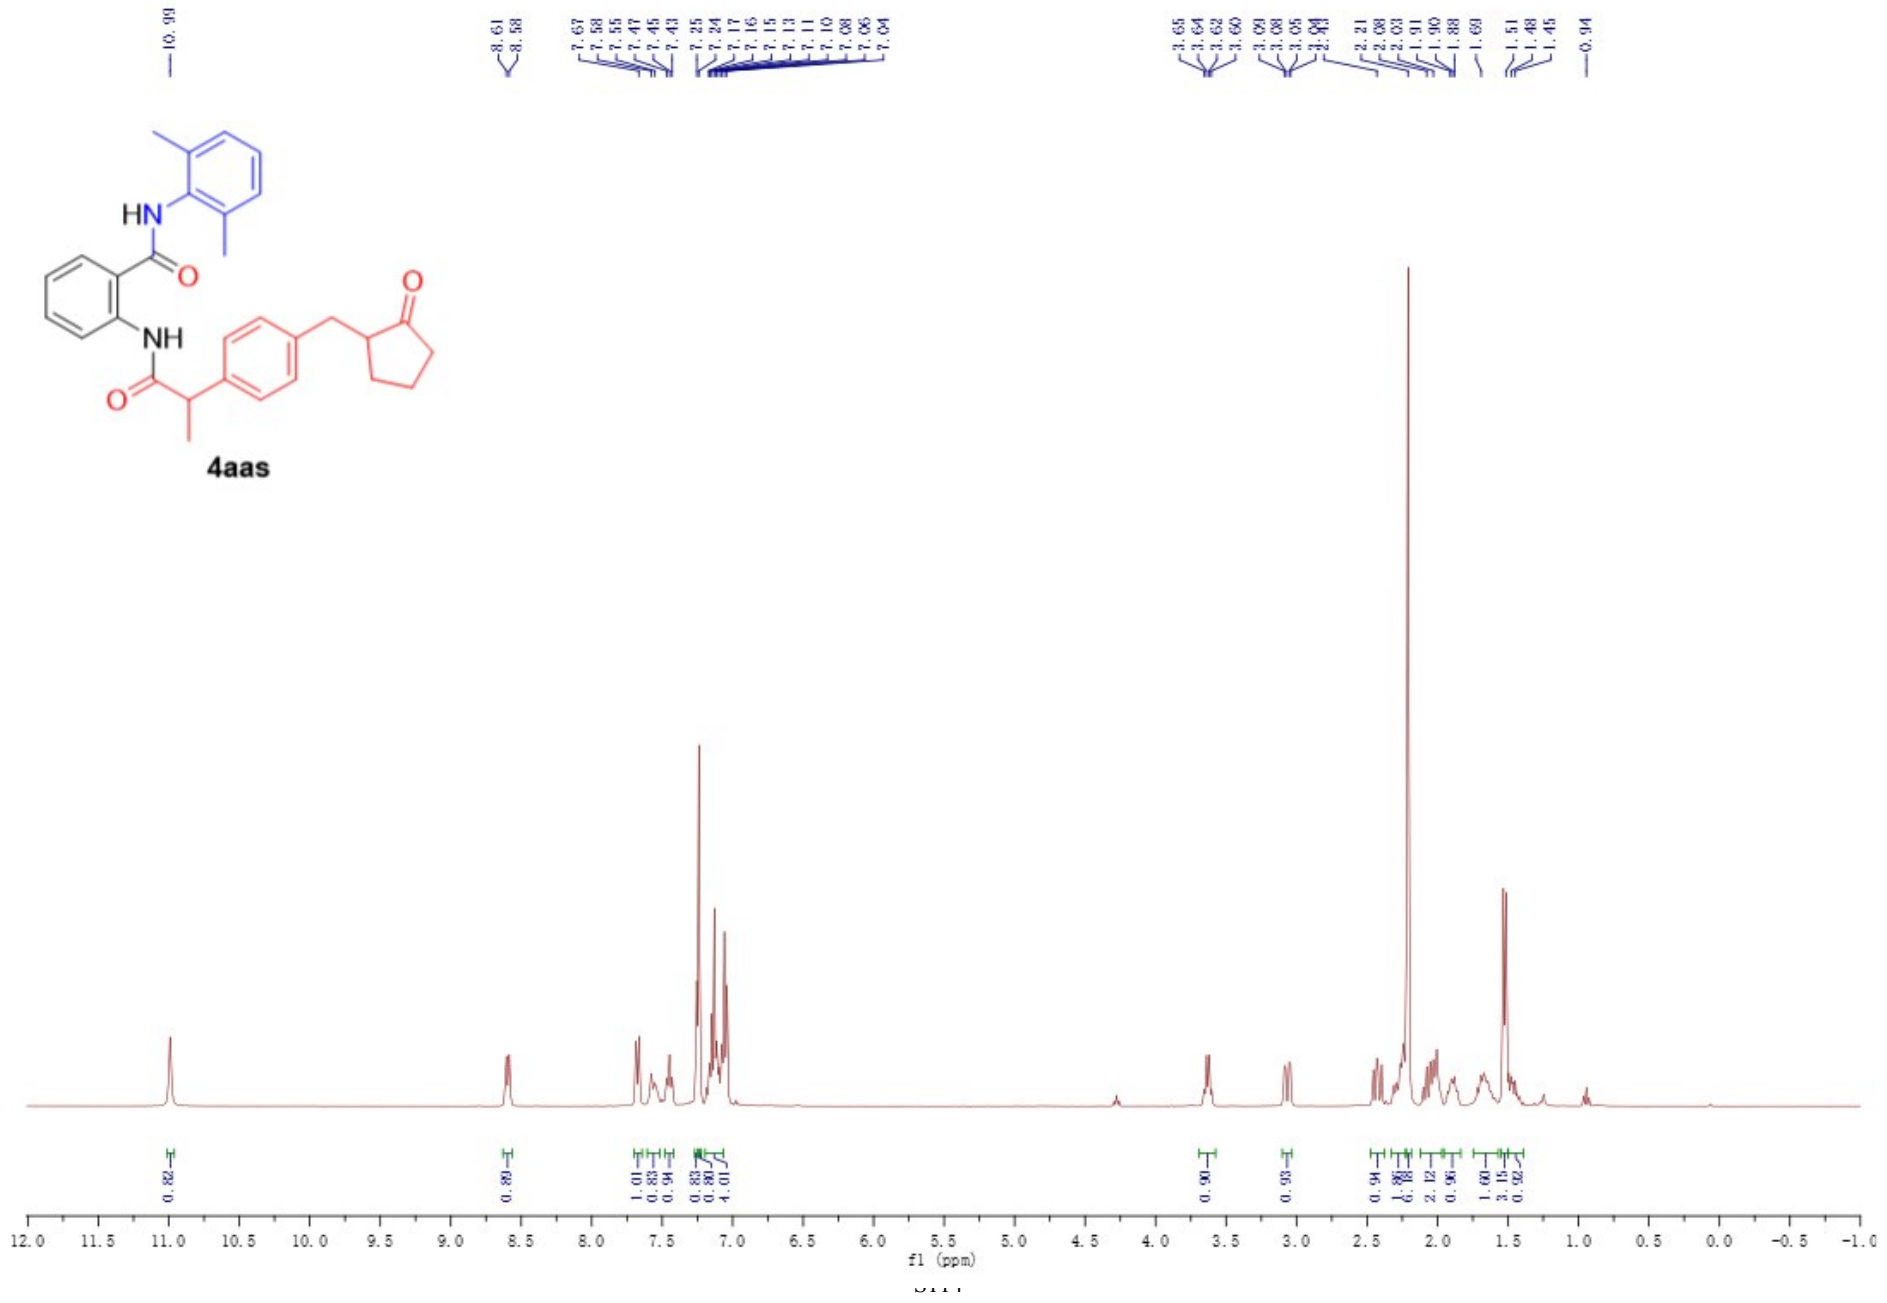

220.42

173.43

167.79

140.20

139.06

138.95

135.89

133.94

133.94

136.85

123.03

121.94

120.68

51.15

48.60

38.33

35.41

29.37

20.67

18.59

18.47

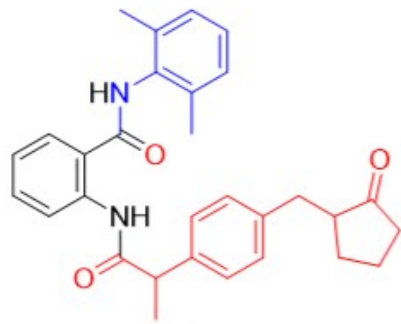

**4aas**

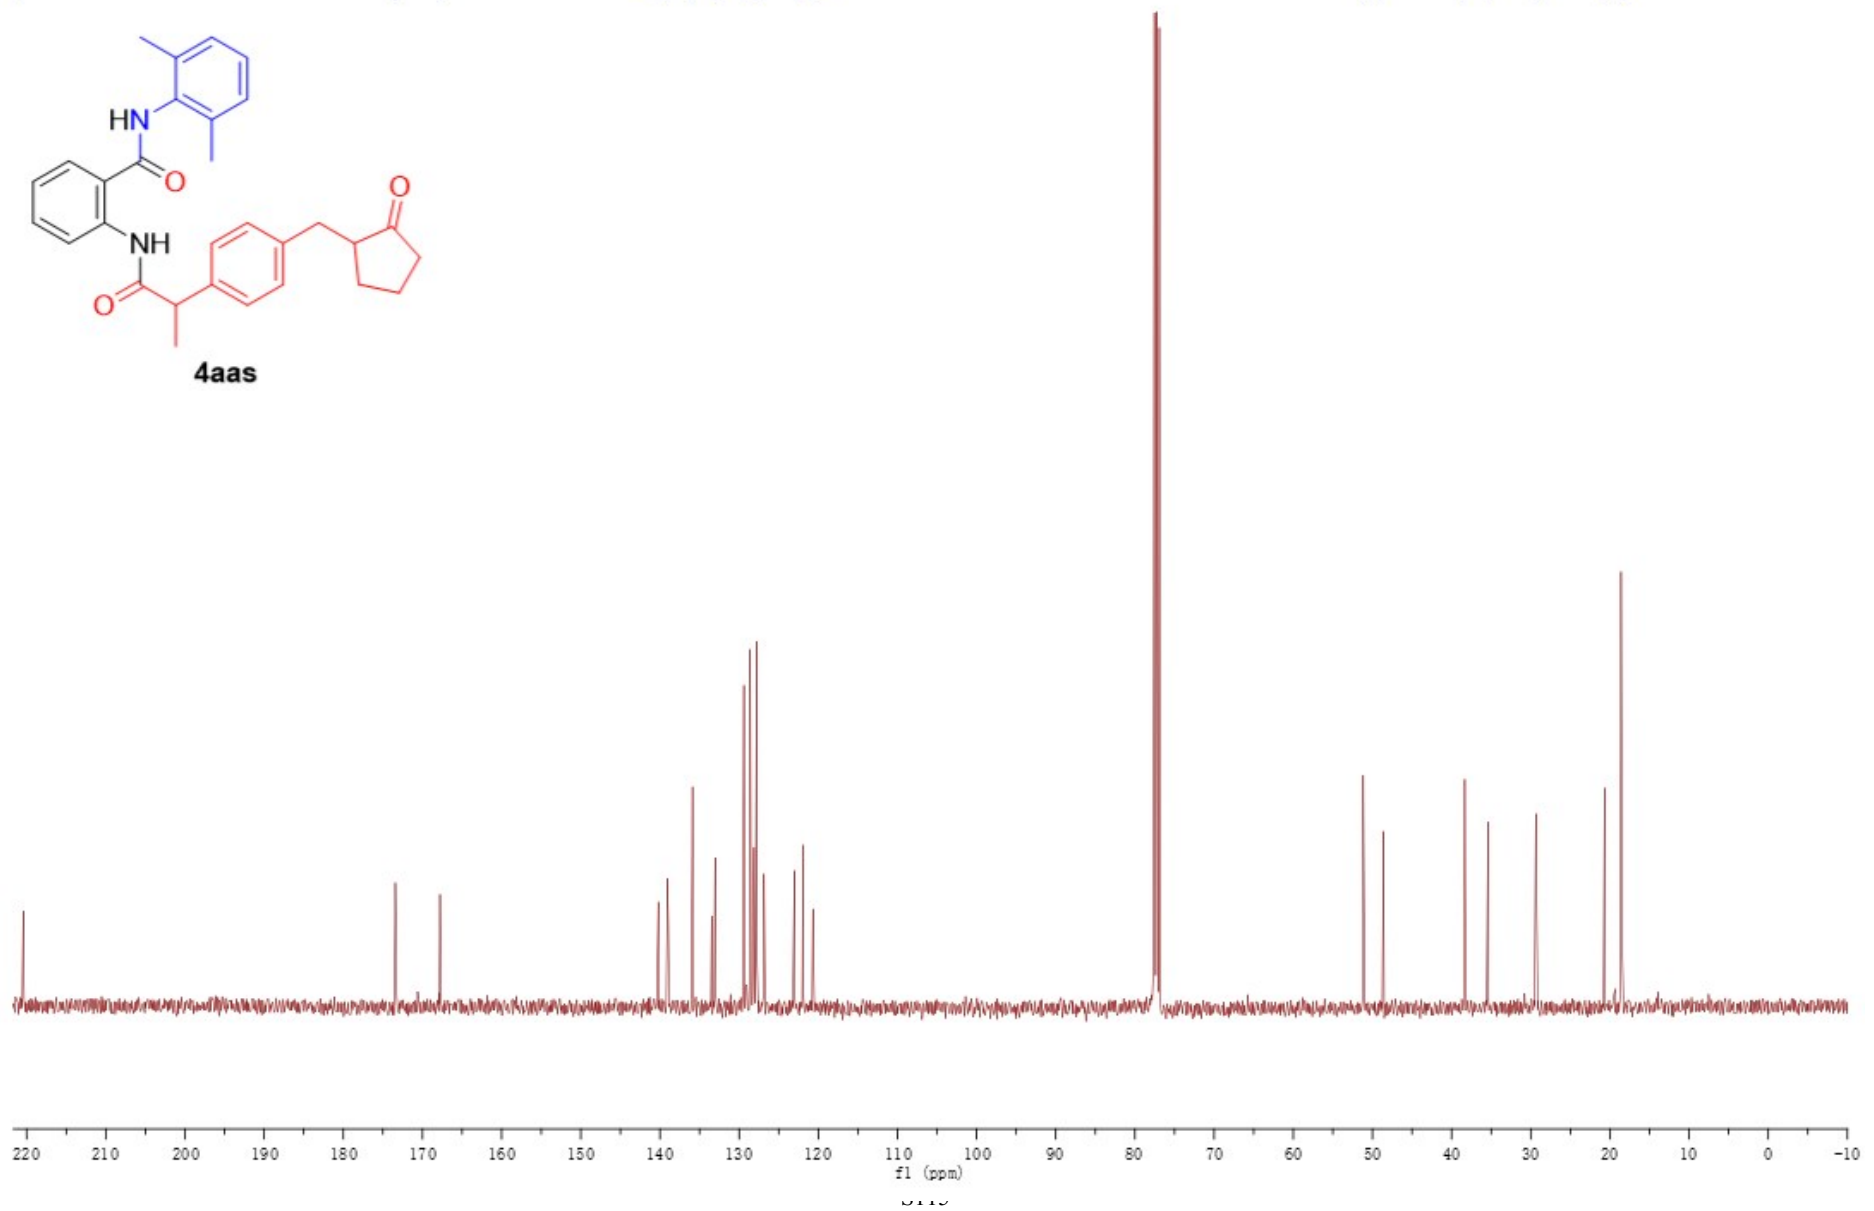

## 6. X-ray of 4aaa

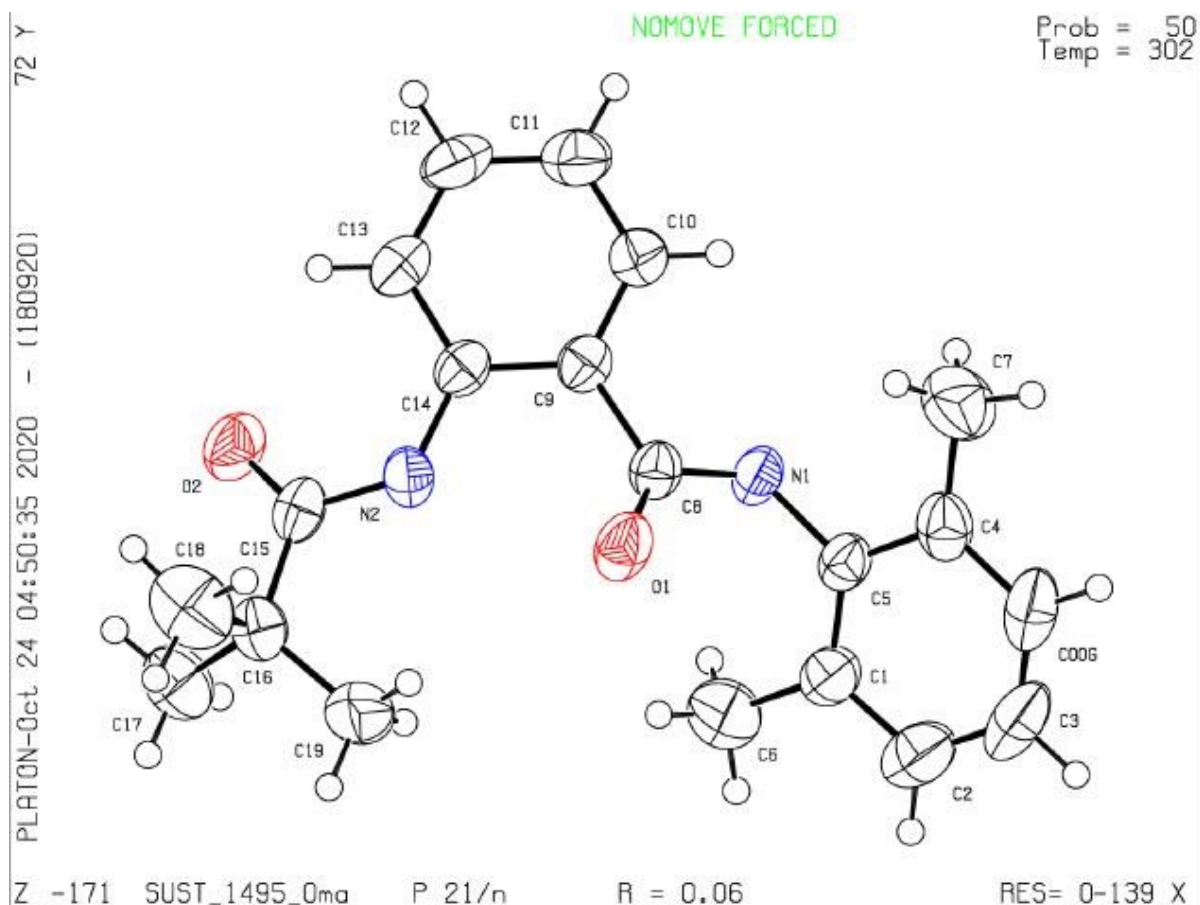

Bond precision: C-C = 0.0042 Å

Wavelength=0.71073

Cell: a=13.135(2) b=10.7195(17) c=13.166(2)  
 alpha=90 beta=102.281(10) gamma=90  
 Temperature: 302 K

|                        | Calculated    | Reported      |
|------------------------|---------------|---------------|
| Volume                 | 1811.4(5)     | 1811.4(5)     |
| Space group            | P 21/n        | P 21/n        |
| Hall group             | -P 2yn        | -P 2yn        |
| Moiety formula         | C20 H22 N2 O2 | ?             |
| Sum formula            | C20 H22 N2 O2 | C20 H22 N2 O2 |
| Mr                     | 322.40        | 322.39        |
| Dx, g cm <sup>-3</sup> | 1.182         | 1.182         |
| Z                      | 4             | 4             |
| Mu (mm <sup>-1</sup> ) | 0.077         | 0.077         |
| F000                   | 688.0         | 688.0         |
| F000'                  | 688.28        |               |
| h,k,lmax               | 17,13,17      | 17,13,17      |
| Nref                   | 4196          | 4138          |
| Tmin,Tmax              | 0.989,0.990   |               |
| Tmin'                  | 0.989         |               |

Correction method= Not given

Data completeness= 0.986

Theta(max)= 27.607

R(reflections)= 0.0621( 1734)

wR2(reflections)= 0.1964( 4138)

S = 1.014

Npar= 223
